# Supplementary material for: ARL3 activation requires the co-GEF BART and effector-mediated turnover
Source: eLife. 2021 Jan 13;10:e64624. doi: 10.7554/eLife.64624 (PMC7817177; doi:10.7554/eLife.64624)
Supplement: Figure 1—source data 1. [file elife-64624-fig1-data1.xlsx]

## Sheet: Sheet1
2uMmntGDP/40uMGDP	%ARL3 - GDP	2uMmntGDP/40uMGTP	%ARL3 - GTP	2uMMntGDP/40uMGppNHp	%ARL3 - GppNHp	2uMmntGDP
2.75159	0.0151134	102.758	0.564409	149.019	0.818503	182.063
4.76433	0.0261686	85.6242	0.4703	156.236	0.858141
12.4586	0.0684302	101.14	0.555523	151.701	0.833232
