# Supplementary material for: ARL3 activation requires the co-GEF BART and effector-mediated turnover
Source: eLife. 2021 Jan 13;10:e64624. doi: 10.7554/eLife.64624 (PMC7817177; doi:10.7554/eLife.64624)
Supplement: Figure 1—source data 2. [file elife-64624-fig1-data2.xlsx]

## Sheet: Sheet1
	2uM Arl3mD		2uM Arl3mD+10uM Arl13B
time	150uM GDP	time	150uM GDP	150uM GppNHp
0	266	0	248	255
14.091	270	9.102	242	256
28.182	274	18.205	254	253
42.271	268	27.31	256	257
56.346	278	36.413	251	255
70.428	284	45.522	263	252
84.506	282	54.62	260	259
98.605	289	63.725	250	249
112.68	276	72.831	251	250
126.778	274	81.945	262	245
140.855	271	91.051	246	253
154.942	283	100.164	253	257
169.009	284	109.264	259	257
183.078	269	118.366	250	255
197.162	275	127.463	257	266
211.25	277	136.571	257	250
225.323	268	145.676	266	257
239.392	272	154.775	255	247
253.468	269	163.882	258	249
267.548	269	172.982	253	252
281.63	285	182.08	256	248
295.711	274	191.181	250	255
309.774	270	200.283	261	237
323.858	278	209.384	250	245
337.94	278	218.485	246	244
352.02	276	227.586	250	254
366.087	277	236.686	257	248
380.176	267	245.792	253	259
394.259	273	254.895	250	257
408.34	264	263.999	256	244
422.411	274	273.106	252	240
436.486	270	282.212	251	245
450.568	265	291.315	241	240
464.652	263	300.424	245	242
478.734	276	309.551	257	246
492.809	264	318.665	246	239
506.896	263	327.781	249	256
520.981	272	336.894	254	245
535.054	265	346	251	246
549.133	273	355.101	248	240
563.208	269	364.212	256	237
577.294	270	373.311	243	247
591.376	259	382.409	263	241
605.462	263	391.509	248	244
619.535	262	400.61	250	230
633.614	268	409.712	257	243
647.708	267	418.809	240	250
661.792	279	427.91	238	246
675.871	269	437.015	235	236
689.952	274	446.121	246	235
704.032	260	455.223	250	239
718.117	270	464.33	251	238
732.186	261	473.438	250	247
746.257	275	482.541	245	251
760.329	273	491.649	254	236
774.406	269	500.748	243	234
788.496	273	509.853	240	238
802.575	267	518.954	254	232
816.657	261	528.066	247	231
830.734	259	537.182	237	234
844.817	262	546.289	247	226
858.902	264	555.393	256	243
872.977	272	564.494	240	236
887.059	267	573.599	245	234
901.142	266	582.704	237	239
915.224	262	591.801	248	234
929.301	269	600.896	243	236
943.373	260	609.995	236	241
957.456	267	619.097	242	234
971.533	272	628.194	241	240
985.602	266	637.296	238	228
999.685	260	646.392	250	231
1013.77	264	655.495	244	235
1027.86	271	664.594	238	226
1041.95	258	673.703	242	236
1056.02	266	682.805	237	243
1070.09	259	691.912	228	237
1084.18	268	701.012	241	225
1098.28	262	710.11	230	239
1112.36	261	719.212	243	235
1126.55	266	728.309	241	230
1140.62	267	737.415	239	232
1154.71	261	746.515	244	226
1168.78	264	755.62	236	223
1182.86	266	764.732	244	232
1196.93	259	773.852	246	239
1211.02	267	782.96	245	224
1225.12	274	792.061	242	237
1239.21	267	801.16	247	225
1253.29	267	810.257	240	237
1267.37	264	819.354	242	230
1281.46	259	828.456	253	234
1295.53	261	837.55	247	228
1309.61	260	846.65	241	231
1323.68	252	855.747	244	231
1337.77	277	864.848	234	231
1351.86	264	873.947	229	226
1365.94	265	883.05	235	237
1380.01	257	892.148	237	239
1394.1	257	901.248	245	233
1408.18	253	910.355	237	238
1422.27	256	919.461	235	227
1436.35	258	928.566	245	240
1450.43	270	937.676	231	231
1464.52	252	946.782	232	233
1478.61	270	955.88	250	231
1492.68	261	964.978	237	238
1506.76	249	974.073	235	223
1520.83	269	983.183	242	222
1534.91	262	992.294	239	236
1549	263	1001.41	230	230
1563.09	268	1010.5	230	229
1577.17	259	1019.61	235	236
1591.25	266	1028.71	242	219
1605.34	264	1037.8	222	231
1619.41	258	1046.9	230	226
1633.49	251	1056	233	231
1647.59	261	1065.1	236	213
1661.67	279	1074.21	231	219
1675.77	278	1083.31	224	221
1689.84	264	1092.41	229	230
1703.92	247	1101.51	239	227
1718	252	1110.62	237	223
1732.08	258	1119.73	236	224
1746.16	268	1128.84	242	223
1760.23	262	1137.95	231	227
1774.31	263	1147.06	233	224
1788.38	258	1156.17	239	227
1802.46	255	1165.28	239	230
1816.53	257	1174.39	241	237
1830.61	270	1183.5	239	222
1844.69	269	1192.6	244	225
1858.77	263	1201.72	244	223
1872.86	267	1210.83	240	223
1886.94	262	1219.95	245	232
1901.02	254	1229.05	230	229
1915.11	257	1238.16	243	222
1929.2	273	1247.27	224	224
1943.27	251	1256.38	234	228
1957.34	261	1265.49	235	226
1971.42	266	1274.59	239	220
1985.5	262	1283.7	246	220
1999.59	251	1292.8	242	231
2013.67	259	1301.91	247	228
2027.75	258	1311.03	231	220
2041.83	259	1320.14	228	233
2055.9	257	1329.26	228	226
2069.98	247	1338.36	244	226
2084.05	254	1347.47	237	232
2098.14	262	1356.58	235	223
2112.23	256	1365.69	242	220
2126.31	260	1374.8	235	225
2140.37	256	1383.92	232	218
2154.44	266	1393.03	227	226
2168.52	252	1402.14	232	224
2182.6	260	1411.25	230	227
2196.67	258	1420.36	235	223
2210.75	264	1429.47	229	231
2224.83	264	1438.58	233	209
2238.92	257	1447.7	237	219
2252.99	265	1456.81	236	223
2267.07	262	1465.92	236	225
2281.16	244	1475.03	234	222
2295.25	260	1484.14	238	218
2309.33	257	1493.24	245	224
2323.41	250	1502.35	232	221
2337.5	261	1511.45	241	223
2351.58	260	1520.56	243	222
2365.67	257	1529.67	238	228
2379.74	256	1538.78	230	238
2393.82	259	1547.88	236	209
2407.9	254	1556.99	223	224
2421.98	273	1566.1	232	219
2436.07	261	1575.2	232	232
2450.15	270	1584.31	239	224
2464.23	261	1593.42	232	225
2478.31	250	1602.52	242	221
2492.4	258	1611.63	243	225
2506.47	265	1620.73	239	219
2520.55	264	1629.84	226	220
2534.64	259	1638.95	227	219
2548.73	256	1648.05	235	225
2562.82	252	1657.16	244	223
2576.9	262	1666.27	231	217
2590.98	262	1675.39	233	215
2605.06	249	1684.49	229	214
2619.14	250	1693.6	240	216
2633.21	256	1702.7	239	221
2647.29	246	1711.8	227	218
2661.37	253	1720.92	234	219
2675.46	252	1730.03	242	227
2689.53	259	1739.14	236	221
2703.61	257	1748.25	245	225
2717.7	266	1757.36	243	213
2731.78	264	1766.47	230	220
2745.88	266	1775.57	233	211
2759.96	262	1784.68	230	225
2774.04	257	1793.81	230	219
2788.13	255	1802.92	224	207
2802.21	251	1812.03	232	221
2816.29	268	1821.14	235	216
2830.36	264	1830.24	230	218
2844.44	248	1839.35	231	218
2858.52	255	1848.45	229	214
2872.61	258	1857.55	238	225
2886.68	253	1866.65	229	214
2900.76	262	1875.77	225	215
2914.85	258	1884.88	230	213
2928.94	250	1893.98	235	220
2943.02	260	1903.09	228	219
2957.09	263	1912.19	230	212
2971.18	264	1921.3	230	227
2985.28	252	1930.4	228	221
2999.37	254	1939.51	237	221
3013.45	255	1948.61	226	215
3027.53	263	1957.73	220	214
3041.6	255	1966.84	227	219
3055.68	250	1975.96	231	210
3069.76	255	1985.06	235	208
3083.84	248	1994.17	222	216
3097.93	251	2003.28	227	228
3112.01	266	2012.39	225	203
3126.08	253	2021.49	232	222
3140.16	255	2030.6	221	222
3154.24	258	2039.71	230	209
3168.33	247	2048.82	225	217
3182.42	249	2057.92	243	214
3196.49	251	2067.03	222	211
3210.58	250	2076.13	227	218
3224.66	262	2085.24	224	219
3238.74	251	2094.35	229	212
3252.82	253	2103.46	226	209
3266.9	245	2112.58	227	210
3280.98	258	2121.69	230	223
3295.07	257	2130.79	233	214
3309.15	256	2139.9	233	211
3323.22	250	2149.01	221	209
3337.31	251	2158.12	229	219
3351.39	249	2167.22	224	219
3365.47	251	2176.32	222	210
3379.54	262	2185.43	224	220
3393.63	252	2194.53	230	221
3407.72	254	2203.64	236	216
3421.8	252	2212.74	219	214
3435.88	252	2221.86	225	215
3449.96	265	2230.95	236	205
3464.04	250	2240.06	231	212
3478.12	259	2249.17	232	207
3492.21	255	2258.27	230	212
3506.29	255	2267.38	219	212
3520.37	270	2276.48	218	213
3534.45	248	2285.59	222	213
3548.53	253	2294.7	224	217
3562.61	254	2303.81	229	210
3576.68	243	2312.93	224	211
3590.76	255	2322.05	221	213
3604.85	255	2331.16	227	223
3618.94	253	2340.28	215	219
3633.01	253	2349.38	229	207
3647.08	258	2358.49	234	221
3661.17	258	2367.59	234	213
3675.24	253	2376.69	232	213
3689.32	257	2385.81	225	210
3703.4	256	2394.93	223	215
3717.48	261	2404.03	223	207
3731.57	248	2413.13	235	218
3745.64	248	2422.24	226	217
3759.71	260	2431.35	225	203
3773.79	249	2440.45	230	210
3787.88	250	2449.56	228	213
3801.96	260	2458.66	214	205
3816.04	255	2467.78	229	199
3830.13	252	2476.88	222	203
3844.22	248	2485.99	230	216
3858.31	261	2495.09	227	211
3872.39	271	2504.2	229	202
3886.47	244	2513.3	232	214
3900.55	249	2522.41	239	218
3914.64	247	2531.53	227	215
3928.73	252	2540.64	224	199
3942.8	249	2549.77	221	205
3956.87	246	2558.87	219	213
3970.96	257	2567.98	218	198
3985.04	243	2577.09	224	214
3999.11	241	2586.19	227	214
4013.2	256	2595.3	218	206
4027.28	239	2604.4	223	206
4041.37	248	2613.5	227	204
4055.45	250	2622.6	221	207
4069.53	254	2631.71	231	217
4083.61	241	2640.81	217	211
4097.79	238	2649.91	234	206
4112.26	245	2659.02	234	203
4126.33	248	2668.13	227	199
4140.41	245	2677.24	231	212
4154.5	260	2686.34	216	210
4168.58	244	2695.44	216	207
4182.66	245	2704.55	220	212
4196.74	253	2713.66	222	209
4210.82	250	2722.76	224	206
4224.9	246	2731.87	234	201
4238.99	249	2740.97	228	226
4253.07	250	2750.08	224	206
4267.17	263	2759.2	220	209
4281.25	247	2768.3	229	199
4295.34	250	2777.41	221	209
4309.42	262	2786.52	227	209
4323.49	245	2795.62	234	212
4337.57	252	2804.73	227	211
4351.66	249	2813.83	219	204
4365.74	254	2822.94	221	208
4379.81	246	2832.04	220	208
4393.89	251	2841.14	215	201
4407.98	252	2850.25	220	214
4422.06	240	2859.36	221	212
4436.14	260	2868.46	221	198
4450.22	248	2877.57	228	209
4464.3	247	2886.67	224	205
4478.4	257	2895.77	212	209
4492.48	236	2904.87	223	204
4506.57	247	2913.97	220	202
4520.65	255	2923.08	228	201
4534.73	245	2932.19	227	200
4548.81	254	2941.3	217	202
4562.88	248	2950.4	211	205
4576.96	259	2959.51	231	215
4591.04	253	2968.6	232	211
4605.12	257	2977.72	224	206
4619.21	246	2986.83	218	207
4633.28	262	2995.93	225	208
4647.37	258	3005.03	212	211
4661.46	246	3014.15	220	201
4675.54	244	3023.25	224	200
4689.62	249	3032.35	218	200
4703.71	253	3041.45	209	198
4717.79	247	3050.56	218	206
4731.88	244	3059.66	223	206
4745.95	258	3068.76	215	190
4760.03	258	3077.86	210	210
4774.11	237	3086.97	222	205
4788.21	249	3096.07	229	209
4802.29	247	3105.17	226	202
4816.36	252	3114.28	210	206
4830.44	245	3123.38	232	208
4844.51	249	3132.49	226	211
4858.59	247	3141.6	223	222
4872.68	250	3150.71	211	201
4886.76	253	3159.82	220	192
4900.85	257	3168.93	213	202
4914.94	253	3178.03	220	219
4929.02	252	3187.14	198	202
4943.11	253	3196.25	212	207
4957.19	250	3205.36	230	219
4971.27	253	3214.48	215	190
4985.35	246	3223.58	225	199
4999.43	247	3232.69	211	207
5013.51	254	3241.79	219	206
5027.59	249	3250.89	227	202
5041.68	257	3260	220	213
5055.76	252	3269.1	234	199
5069.83	233	3278.21	224	195
5083.91	247	3287.31	224	198
5098	248	3296.41	210	194
5112.09	248	3305.52	215	200
5126.16	245	3314.62	220	200
5140.24	243	3323.73	215	198
5154.34	253	3332.84	221	207
5168.42	238	3341.96	205	193
5182.5	256	3351.06	225	191
5196.57	243	3360.18	229	202
5210.66	253	3369.3	219	207
5224.75	248	3378.41	210	199
5238.83	251	3387.51	221	193
5252.91	251	3396.61	211	201
5266.99	237	3405.73	215	204
5281.07	252	3414.84	209	204
5295.14	240	3423.96	214	208
5309.22	250	3433.08	214	197
5323.31	242	3442.19	217	199
5337.4	247	3451.3	212	201
5351.5	237	3460.4	234	193
5365.58	246	3469.51	222	204
5379.66	248	3478.61	225	197
5393.73	249	3487.71	223	186
5407.8	252	3496.81	217	198
5421.88	253	3505.91	202	197
5435.98	245	3515.02	218	194
5450.06	250	3524.12	204	194
5464.14	232	3533.22	218	185
5478.22	252	3542.33	225	199
5492.29	248	3551.44	208	189
5506.37	249	3560.54	216	183
5520.45	254	3569.65	218	200
5534.53	255	3578.75	214	199
5548.62	248	3587.86	212	197
5562.72	239	3596.96	215	194
5576.8	249	3606.06	216	208
5590.88	245	3615.16	215	185
5604.96	235	3624.28	206	198
5619.03	240	3633.39	222	193
5633.1	252	3642.5	219	199
5647.19	255	3651.62	212	202
5661.27	257	3660.74	212	197
5675.36	246	3669.84	218	192
5689.43	248	3678.94	212	199
5703.53	252	3688.04	223	195
5717.62	252	3697.15	216	190
5731.69	247	3706.26	205	195
5745.77	248	3715.36	206	188
5759.87	245	3724.46	205	198
5773.96	238	3733.57	220	189
5788.05	247	3742.66	213	196
5802.12	250	3751.77	203	196
5816.2	245	3760.88	203	192
5830.27	250	3769.98	214	199
5844.36	237	3779.09	219	198
5858.45	240	3788.2	186	191
5872.52	252	3797.3	208	201
5886.58	236	3806.41	215	196
5900.67	236	3815.52	215	198
5914.75	240	3824.63	218	186
5928.82	243	3833.73	214	194
5942.91	241	3842.84	211	195
5956.99	248	3851.96	215	192
5971.07	239	3861.07	206	191
5985.15	237	3870.18	209	194
5999.23	235	3879.28	204	190
6013.31	244	3888.39	197	195
6027.4	245	3897.49	208	189
6041.48	240	3906.6	211	186
6055.56	242	3915.7	195	193
6069.64	243	3924.81	207	194
6083.72	252	3933.92	205	193
6097.81	251	3943.02	211	191
6111.88	238	3952.13	212	191
6125.95	248	3961.23	210	186
6140.03	237	3970.33	212	193
6154.12	240	3979.45	199	192
6168.19	250	3988.55	211	193
6182.27	249	3997.66	201	204
6196.36	237	4006.76	209	193
6210.45	239	4015.87	222	200
6224.53	252	4024.97	214	192
6238.61	241	4034.08	204	190
6252.69	246	4043.2	209	192
6266.77	245	4052.29	204	195
6280.85	245	4061.41	202	205
6294.93	249	4070.52	209	190
6309.01	247	4079.64	198	190
6323.09	240	4088.73	203	192
6337.17	256	4097.84	210	189
6351.25	239	4106.94	206	187
6365.33	252	4116.04	219	186
6379.41	238	4125.15	193	195
6393.5	244	4134.26	219	193
6407.59	234	4143.36	206	178
6421.67	236	4152.45	204	189
6435.75	246	4161.55	217	183
6449.84	249	4170.66	209	191
6463.92	245	4179.77	205	189
6478	238	4188.88	191	190
6492.08	238	4197.98	202	189
6506.16	249	4207.09	200	189
6520.24	246	4216.19	211	199
6534.32	245	4225.3	211	190
6548.4	237	4234.4	211	189
6562.48	240	4243.51	214	194
6576.57	246	4252.61	196	189
6590.65	245	4261.72	214	189
6604.74	247	4270.81	202	198
6618.82	240	4279.93	208	188
6632.9	236	4289.03	205	195
6646.98	242	4298.14	209	192
6661.06	243	4307.26	204	184
6675.14	239	4316.36	203	186
6689.22	251	4325.47	206	185
6703.3	244	4334.57	202	193
6717.39	250	4343.67	205	188
6731.47	244	4352.77	196	198
6745.54	245	4361.88	206	188
6759.62	245	4370.97	202	184
6773.71	244	4380.09	203	179
6787.79	244	4389.19	189	182
6801.86	248	4398.3	199	199
6815.94	250	4407.41	213	186
6830.02	234	4416.5	213	195
6844.12	241	4425.61	195	184
6858.2	235	4434.7	203	186
6872.27	254	4443.81	200	193
6886.35	234	4452.91	203	191
6900.44	243	4462.02	203	191
6914.52	249	4471.13	200	185
6928.59	252	4480.24	202	190
6942.67	246	4489.34	212	175
6956.76	242	4498.46	200	195
6970.84	241	4507.58	197	195
6984.92	248	4516.68	199	181
6998.99	245	4525.8	209	189
7013.08	241	4534.9	212	194
7027.17	240	4544.01	199	190
7041.26	246	4553.11	209	190
7055.34	243	4562.22	206	187
7069.43	243	4571.32	209	180
7083.51	240	4580.42	202	187
7097.6	247	4589.53	191	191
7111.67	251	4598.64	200	194
7125.75	249	4607.73	219	179
7139.83	237	4616.84	193	184
7153.91	238	4625.95	198	179
7167.99	243	4635.06	197	183
7182.07	253	4644.16	191	180
7196.14	237	4653.27	200	194
7210.22	241	4662.38	204	176
7224.28	246	4671.49	202	183
7238.35	244	4680.59	204	182
7252.43	250	4689.7	200	186
7266.51	237	4698.8	200	183
7280.6	238	4707.91	194	180
7294.68	233	4717.02	220	191
7308.76	226	4726.13	195	183
7322.84	237	4735.24	205	186
7336.92	241	4744.35	196	177
7350.98	246	4753.46	201	179
7365.06	239	4762.56	190	179
7379.14	242	4771.66	187	192
7393.23	238	4780.76	192	175
7407.32	248	4789.86	199	187
7421.39	243	4798.97	189	181
7435.47	248	4808.06	207	171
7449.53	249	4817.17	204	183
7463.62	234	4826.27	192	205
7477.71	237	4835.38	197	184
7491.79	252	4844.48	184	188
7505.88	237	4853.59	197	185
7519.96	241	4862.69	192	189
7534.03	246	4871.79	202	185
7548.1	242	4880.9	201	193
7562.19	240	4890.01	208	178
7576.27	245	4899.11	195	187
7590.35	251	4908.21	201	192
7604.44	237	4917.32	190	186
7618.51	235	4926.42	204	181
7632.59	237	4935.53	193	178
7646.68	239	4944.64	190	181
7660.75	241	4953.75	209	186
7674.82	241	4962.85	188	182
7688.91	229	4971.95	204	186
7703	247	4981.05	201	169
7717.1	239	4990.15	193	178
7731.16	245	4999.26	187	187
7745.24	237	5008.37	188	190
7759.32	232	5017.47	203	178
7773.4	239	5026.57	191	175
7787.49	236	5035.67	199	178
7801.57	235	5044.77	189	170
7815.64	236	5053.87	186	186
7829.84	236	5062.97	187	183
7844.32	249	5072.08	207	188
7858.39	250	5081.19	201	187
7872.47	234	5090.3	202	174
7886.54	244	5099.4	193	188
7900.63	247	5108.51	197	178
7914.73	240	5117.61	187	184
7928.81	237	5126.72	197	176
7942.89	236	5135.82	200	179
7956.98	240	5144.92	194	180
7971.06	249	5154.02	202	174
7985.14	251	5163.13	193	180
7999.22	244	5172.24	196	172
8013.3	252	5181.35	193	172
8027.39	238	5190.45	197	173
8041.46	243	5199.55	203	178
8055.55	243	5208.65	186	186
8069.63	233	5217.76	193	171
8083.72	239	5226.86	205	184
8097.8	241	5235.96	197	166
8111.88	237	5245.06	197	183
8125.97	243	5254.17	203	183
8140.05	231	5263.27	191	170
8154.14	241	5272.38	179	173
8168.21	246	5281.48	190	182
8182.28	247	5290.59	189	186
8196.37	241	5299.7	196	177
8210.45	240	5308.8	187	183
8224.53	239	5317.9	183	179
8238.6	236	5327	188	187
8252.68	248	5336.11	185	185
8266.77	242	5345.21	197	187
8280.86	246	5354.32	189	182
8294.94	238	5363.43	190	171
8309.01	244	5372.54	187	176
8323.09	243	5381.65	190	185
8337.18	230	5390.76	181	175
8351.26	233	5399.86	193	171
8365.34	240	5408.95	192	185
8379.42	233	5418.06	200	188
8393.5	238	5427.16	183	183
8407.57	245	5436.26	190	168
8421.65	235	5445.36	183	175
8435.74	231	5454.47	182	168
8449.82	232	5463.57	187	184
8463.92	247	5472.67	204	173
8477.99	235	5481.77	184	174
8492.07	243	5490.87	186	181
8506.15	234	5499.98	190	176
8520.24	247	5509.09	183	158
8534.31	248	5518.2	180	176
8548.39	253	5527.31	190	172
8562.48	233	5536.41	180	181
8576.57	235	5545.52	179	172
8590.66	242	5554.62	190	169
8604.73	236	5563.73	188	172
8618.81	246	5572.83	184	172
8632.9	233	5581.93	176	164
8646.98	225	5591.04	185	180
8661.06	238	5600.15	199	170
8675.14	234	5609.26	193	173
8689.22	234	5618.37	190	168
8703.3	237	5627.48	187	179
8717.38	230	5636.57	188	183
8731.45	242	5645.68	185	171
8745.53	231	5654.78	184	178
8759.61	236	5663.88	186	179
8773.7	233	5672.98	192	185
8787.79	240	5682.09	194	180
8801.87	244	5691.19	178	188
8815.96	250	5700.29	190	172
8830.04	230	5709.4	183	177
8844.11	235	5718.51	193	182
8858.19	245	5727.63	170	181
8872.27	243	5736.73	189	160
8886.35	228	5745.83	183	181
8900.43	239	5754.94	175	177
8914.51	236	5764.05	169	167
8928.58	221	5773.15	187	172
8942.67	235	5782.26	181	182
8956.75	235	5791.37	178	168
8970.83	231	5800.48	174	172
8984.92	245	5809.6	188	181
8999	250	5818.71	179	165
9013.1	245	5827.82	189	168
9027.17	235	5836.92	178	166
9041.24	231	5846.02	179	174
9055.3	241	5855.13	184	166
9069.37	245	5864.23	187	171
9083.45	241	5873.33	189	174
9097.53	235	5882.44	173	173
9111.61	246	5891.54	184	180
9125.69	240	5900.64	184	167
9139.77	225	5909.75	173	168
9153.87	231	5918.85	187	167
9167.94	240	5927.97	173	182
9182.03	244	5937.06	177	171
9196.12	234	5946.17	186	172
9210.22	234	5955.28	175	169
9224.3	222	5964.4	174	166
9238.38	242	5973.51	192	170
9252.46	235	5982.61	178	170
9266.55	238	5991.72	182	180
9280.63	244	6000.82	187	179
9294.7	241	6009.93	176	172
9308.78	236	6019.03	176	169
9322.86	242	6028.14	183	176
9336.95	236	6037.25	170	166
9351.02	245	6046.36	183	172
9365.1	236	6055.47	171	176
9379.19	230	6064.57	180	165
9393.26	242	6073.68	172	187
9407.36	231	6082.78	178	172
9421.43	230	6091.89	181	175
9435.51	232	6100.99	178	167
9449.6	224	6110.1	181	172
9463.67	236	6119.2	181	166
9477.75	227	6128.31	175	171
9491.82	235	6137.42	181	168
9505.92	239	6146.53	182	176
9520	231	6155.65	167	170
9534.08	225	6164.75	189	171
9548.15	236	6173.86	190	181
9562.24	240	6182.97	180	174
9576.32	221	6192.08	183	170
9590.4	236	6201.18	175	182
9604.47	227	6210.28	166	176
9618.56	248	6219.39	179	167
9632.65	239	6228.49	179	176
9646.73	239	6237.6	181	181
9660.8	241	6246.7	176	159
9674.87	230	6255.81	176	181
9688.95	232	6264.92	175	174
9703.04	243	6274.03	180	168
9717.12	242	6283.13	171	166
9731.19	231	6292.24	183	177
9745.27	227	6301.35	172	173
9759.36	239	6310.46	175	182
9773.44	245	6319.57	173	161
9787.51	228	6328.68	177	168
9801.59	232	6337.78	187	181
9815.68	230	6346.87	182	168
9829.77	223	6355.98	180	176
9843.86	234	6365.09	169	167
9857.94	237	6374.2	179	176
9872.02	233	6383.31	180	179
9886.1	234	6392.42	188	181
9900.17	241	6401.53	176	174
9914.25	236	6410.64	175	162
9928.33	235	6419.75	175	162
9942.41	228	6428.85	189	163
9956.49	235	6437.95	170	167
9970.58	228	6447.05	172	173
9984.65	230	6456.17	179	175
9998.74	248	6465.28	166	177
10012.8	237	6474.4	175	166
10026.9	228	6483.51	160	170
10041	235	6492.61	173	178
10055.1	230	6501.72	163	164
10069.1	233	6510.81	163	169
10083.2	229	6519.92	164	170
10097.3	238	6529.03	179	162
10111.4	222	6538.14	172	173
10125.5	232	6547.24	165	161
10139.5	231	6556.35	178	174
10153.6	235	6565.47	164	173
10167.7	231	6574.58	169	174
10181.8	236	6583.69	166	176
10195.9	231	6592.8	169	181
10210	241	6601.9	177	161
10224	230	6611.01	173	176
10238.1	234	6620.11	169	173
10252.2	237	6629.22	177	183
10266.3	227	6638.33	167	176
10280.4	246	6647.43	178	174
10294.4	240	6656.54	174	175
10308.5	233	6665.65	175	162
10322.6	223	6674.76	177	170
10336.7	237	6683.87	159	167
10350.8	226	6692.98	180	162
10364.8	228	6702.08	177	167
10378.9	233	6711.19	159	183
10393	237	6720.29	173	171
10407.1	238	6729.4	178	164
10421.2	239	6738.51	171	178
10435.3	226	6747.62	171	172
10449.4	231	6756.73	172	173
10463.5	227	6765.84	174	172
10477.5	246	6774.94	166	166
10491.6	239	6784.05	173	164
10505.7	232	6793.15	165	173
10519.8	238	6802.25	174	179
10533.9	237	6811.36	170	174
10548	235	6820.47	166	171
10562	230	6829.58	182	181
10576.1	221	6838.69	171	168
10590.2	224	6847.79	166	166
10604.3	239	6856.9	171	177
10618.3	229	6866	176	178
10632.4	228	6875.1	172	180
10646.5	236	6884.21	163	170
10660.6	231	6893.32	176	173
10674.7	224	6902.44	164	170
10688.7	228	6911.56	167	177
10702.8	235	6920.67	176	168
10716.9	237	6929.77	175	164
10731	240	6938.88	170	172
10745.1	240	6947.99	160	163
10759.1	233	6957.09	181	174
10773.2	244	6966.21	174	171
10787.3	229	6975.31	165	174
10801.4	229	6984.42	156	164
10815.5	233	6993.52	167	166
10829.6	223	7002.62	171	172
10843.6	231	7011.74	166	170
10857.7	225	7020.84	164	177
10871.8	215	7029.95	174	168
10885.8	226	7039.05	164	167
10899.9	227	7048.16	170	169
10914	217	7057.26	173	168
10928.1	241	7066.37	167	168
10942.2	227	7075.47	164	169
10956.3	225	7084.57	152	168
10970.3	236	7093.68	166	170
10984.4	245	7102.78	155	173
10998.5	228	7111.89	173	194
11012.6	244	7121	166	176
11026.7	227	7130.11	159	180
11040.7	228	7139.23	151	175
11054.8	229	7148.34	150	159
11068.9	230	7157.45	155	165
11083	235	7166.56	171	171
11097.1	240	7175.67	159	169
11111.1	232	7184.77	164	170
11125.2	230	7193.88	166	172
11139.3	220	7202.99	183	188
11153.4	222	7212.09	158	179
11167.5	228	7221.19	158	176
11181.5	228	7230.29	151	169
11195.6	233	7239.39	161	156
11209.7	225	7248.48	164	177
11223.8	223	7257.59	162	160
11237.9	224	7266.69	166	168
11252	215	7275.8	164	180
11266	240	7284.91	164	161
11280.1	223	7294.02	160	171
11294.2	228	7303.11	157	172
11308.3	225	7312.23	171	169
11322.4	230	7321.32	158	171
11336.5	224	7330.44	172	165
11350.5	230	7339.55	160	164
11364.6	221	7348.66	156	172
11378.7	237	7357.78	151	173
11392.8	224	7366.88	163	161
11406.9	221	7375.98	165	165
11420.9	236	7385.09	151	178
11435	229	7394.19	158	168
11449.1	224	7403.29	162	168
11463.2	229	7412.39	159	169
11477.3	229	7421.5	148	168
11491.3	231	7430.6	160	163
11505.4	231	7439.71	151	173
11519.5	240	7448.81	159	171
11533.6	237	7457.92	160	175
11547.7	232	7467.02	155	178
11561.8	239	7476.13	171	167
11575.8	235	7485.23	169	167
11589.9	229	7494.33	160	165
11604	230	7503.43	169	172
11618.1	218	7512.53	158	158
11632.2	236	7521.64	153	171
11646.3	237	7530.74	167	177
11660.3	229	7539.86	162	168
11674.4	226	7548.97	141	165
11688.5	235	7558.09	157	168
11702.6	231	7567.2	164	177
11716.6	223	7576.31	160	170
11730.7	230	7585.41	174	169
11744.8	227	7594.52	163	167
11758.9	231	7603.63	155	169
11773	226	7612.73	163	170
11787.1	227	7621.83	161	174
11801.1	222	7630.94	167	176
11815.2	231	7640.03	166	171
11829.3	235	7649.13	163	163
11843.4	226	7658.24	168	160
11857.5	238	7667.34	162	156
11871.5	232	7676.44	161	169
11885.6	234	7685.55	158	178
11899.7	231	7694.66	154	172
11913.8	225	7703.76	153	170
11927.9	229	7712.86	166	174
11942	229	7721.97	164	164
11956	234	7731.07	164	171
11970.1	241	7740.17	154	171
11984.2	224	7749.27	161	182
11998.3	235	7758.37	160	171
12012.4	225	7767.49	173	172
12026.5	218	7776.61	148	174
12040.5	215	7785.71	165	169
12054.6	226	7794.82	158	174
12068.7	243	7803.91	159	176
12082.8	227	7813.02	170	165
12096.8	233	7822.11	152	167
12110.9	222	7831.22	161	163
12125	236	7840.32	161	161
12139.1	220	7849.41	147	169
12153.2	238	7858.52	165	170
12167.3	240	7867.62	164	169
12181.3	233	7876.73	154	167
12195.4	238	7885.84	158	180
12209.5	239	7894.94	160	157
12223.6	232	7904.04	162	170
12237.7	230	7913.15	148	169
12251.8	241	7922.25	145	174
12265.8	220	7931.36	148	178
12279.9	232	7940.46	165	174
12294	230	7949.57	151	171
12308.1	235	7958.67	146	163
12322.2	242	7967.78	152	164
12336.3	234	7976.9	164	164
12350.3	224	7986.02	159	170
12364.4	230	7995.13	149	174
12378.5	217	8004.23	158	180
12392.6	236	8013.33	168	171
12406.7	226	8022.44	157	185
12420.7	238	8031.55	144	185
12434.8	225	8040.65	149	181
12448.9	243	8049.76	146	178
12463	217	8058.86	148	161
12477.1	233	8067.96	151	171
12491.2	233	8077.06	158	186
12505.2	228	8086.16	157	152
12519.3	218	8095.27	155	173
12533.4	217	8104.37	152	168
12547.5	236	8113.48	153	180
12561.5	230	8122.58	164	172
12575.6	232	8131.68	153	158
12589.7	226	8140.79	154	161
12603.8	233	8149.89	141	176
12617.9	219	8159	159	183
12632	230	8168.1	154	162
12646	223	8177.2	154	178
12660.1	215	8186.32	162	180
12674.2	222	8195.43	154	176
12688.3	224	8204.55	143	176
12702.4	232	8213.66	146	171
12716.4	231	8222.76	161	174
12730.5	225	8231.86	159	154
12744.6	227	8240.96	167	169
12758.6	241	8250.07	152	164
12772.7	219	8259.17	166	180
12786.8	226	8268.26	144	164
12800.9	229	8277.36	158	165
12815	225	8286.47	164	169
12829	225	8295.57	148	175
12843.1	232	8304.67	149	155
12857.2	232	8313.77	157	179
12871.3	224	8322.88	161	169
12885.4	222	8331.98	150	168
12899.5	234	8341.08	138	182
12913.5	223	8350.19	149	185
12927.6	235	8359.29	160	170
12941.7	219	8368.4	142	162
12955.8	228	8377.5	145	170
12969.9	229	8386.6	141	180
12983.9	242	8395.71	148	166
12998	233	8404.82	152	169
13012.1	230	8413.93	150	175
13026.2	223	8423.03	147	181
13040.3	223	8432.14	153	153
13054.3	216	8441.25	140	178
13068.4	218	8450.35	140	162
13082.5	225	8459.45	148	173
13096.6	232	8468.56	162	161
13110.7	234	8477.66	154	169
13124.8	227	8486.76	160	170
13138.8	234	8495.86	134	171
13152.9	236	8504.96	148	175
13167	232	8514.07	153	174
13181.1	212	8523.16	150	180
13195.2	235	8532.27	158	164
13209.2	226	8541.37	152	183
13223.3	228	8550.48	153	173
13237.4	231	8559.58	147	162
13251.5	227	8568.69	153	172
13265.6	234	8577.8	147	165
13279.6	231	8586.9	154	172
13293.7	228	8596	147	178
13307.8	228	8605.11	144	157
13321.9	223	8614.22	148	171
13336	225	8623.32	148	165
13350	222	8632.45	153	182
13364.1	223	8641.56	155	170
13378.2	235	8650.67	149	172
13392.3	229	8659.77	141	166
13406.4	228	8668.87	140	176
13420.4	228	8677.97	153	170
13434.5	229	8687.07	155	165
13448.6	235	8696.17	142	172
13462.7	228	8705.26	140	173
13476.8	233	8714.37	154	172
13490.9	237	8723.47	152	175
13505	235	8732.58	138	167
13519	233	8741.68	142	178
13533.1	223	8750.78	144	168
13547.2	223	8759.89	143	171
13561.3	230	8768.99	145	158
13575.3	224	8778.11	138	167
13589.4	218	8787.21	155	167
13603.5	237	8796.33	152	162
13617.6	225	8805.43	153	168
13631.7	218	8814.54	158	174
13645.7	228	8823.64	134	175
13659.8	231	8832.75	138	173
13673.9	228	8841.86	147	171
13688	224	8850.97	138	175
13702.1	240	8860.08	150	172
13716.2	228	8869.19	150	170
13730.3	226	8878.29	149	168
13744.3	220	8887.38	144	183
13758.4	227	8896.49	140	176
13772.5	226	8905.59	141	166
13786.6	225	8914.7	152	163
13800.7	239	8923.8	141	175
13814.7	219	8932.9	143	174
13828.8	232	8942	147	166
13842.9	217	8951.09	157	181
13857	231	8960.19	142	162
13871.1	225	8969.29	152	186
13885.1	230	8978.39	131	166
13899.2	222	8987.5	142	162
13913.3	219	8996.6	152	164
13927.4	219	9005.71	169	168
13941.5	211	9014.81	152	171
13955.6	227	9023.91	141	182
13969.6	229	9033.01	146	160
13983.7	231	9042.12	138	174
13997.8	223	9051.23	160	168
14011.9	228	9060.34	140	167
14026	236	9069.45	153	171
14040	229	9078.56	140	173
14054.1	217	9087.66	155	185
14068.2	229	9096.76	153	166
14082.3	228	9105.85	147	177
14096.4	224	9114.95	148	168
14110.5	246	9124.05	151	166
14124.5	228	9133.15	141	175
14138.6	219	9142.26	142	179
14152.7	217	9151.35	144	165
14166.8	234	9160.46	151	179
14180.9	231	9169.57	154	175
14195	238	9178.67	147	175
14209	228	9187.78	146	165
14223.1	233	9196.88	148	162
14237.2	230	9205.99	148	173
14251.3	216	9215.09	145	180
14265.4	231	9224.2	131	162
14279.4	237	9233.3	130	177
14293.5	219	9242.41	136	162
14307.6	222	9251.51	141	168
14321.7	235	9260.61	144	157
14335.8	223	9269.72	138	168
14349.8	216	9278.83	152	167
14363.9	225	9287.94	140	170
14378	216	9297.05	136	182
14392.1	226	9306.15	149	171
14406.2	220	9315.24	136	164
14420.3	246	9324.34	141	167
14434.3	241	9333.44	140	161
14448.4	228	9342.55	149	165
14462.5	225	9351.66	137	174
14476.6	225	9360.77	135	168
14490.7	218	9369.87	152	176
14504.8	213	9378.98	145	157
14518.9	224	9388.08	134	154
14532.9	222	9397.18	139	156
14547	232	9406.29	149	186
14561.1	219	9415.39	134	169
14575.2	223	9424.5	134	179
14589.2	215	9433.6	146	169
14603.3	224	9442.71	134	164
14617.3	223	9451.81	141	172
14631.4	232	9460.91	148	178
14645.5	240	9470.01	138	171
14659.6	217	9479.11	133	174
14673.7	219	9488.22	146	174
14687.7	219	9497.33	132	185
14701.8	229	9506.45	145	176
14715.9	232	9515.55	141	167
14730	229	9524.66	138	170
14744.1	225	9533.75	147	169
14758.2	224	9542.86	145	177
14772.2	221	9551.96	140	159
14786.3	223	9561.06	138	166
14800.4	236	9570.17	146	171
14814.5	226	9579.27	147	173
14828.6	223	9588.38	134	167
14842.7	224	9597.48	139	168
14856.7	220	9606.59	142	164
14870.8	225	9615.7	145	177
14884.9	227	9624.8	135	181
14899	210	9633.91	132	168
14913.1	219	9643.02	131	170
14927.1	223	9652.12	131	173
14941.2	226	9661.22	135	149
14955.3	231	9670.33	137	164
14969.4	236	9679.43	147	170
14983.5	223	9688.54	136	178
14997.5	219	9697.64	140	166
15011.6	214	9706.76	125	166
15025.7	221	9715.87	141	162
15039.8	227	9724.98	137	169
15053.9	236	9734.08	151	181
15068	219	9743.18	145	169
15082.5	211	9752.29	127	177
15096.6	221	9761.39	136	177
15110.7	219	9770.49	115	169
15124.8	219	9779.59	133	168
15138.8	228	9788.7	156	165
15152.9	227	9797.81	146	173
15167	225	9806.92	135	168
15181.1	225	9816.02	135	170
15195.2	216	9825.12	149	173
15209.3	221	9834.23	134	176
15223.3	222	9843.33	138	167
15237.4	217	9852.43	133	165
15251.5	224	9861.54	144	180
15265.6	221	9870.64	141	166
15279.7	223	9879.74	142	164
15293.7	231	9888.84	140	184
15307.8	219	9897.94	136	159
15321.9	221	9907.03	141	180
15336	235	9916.14	128	166
15350.1	215	9925.25	135	167
15364.1	217	9934.36	136	159
15378.2	225	9943.48	130	165
15392.3	217	9952.58	126	168
15406.4	218	9961.68	128	164
15420.5	221	9970.78	136	169
15434.6	230	9979.89	134	166
15448.6	228	9988.99	142	169
15462.7	227	9998.09	140	171
15476.8	220	10007.2	128	171
15490.9	225	10016.3	120	172
15505	209	10025.4	141	165
15519.1	206	10034.5	137	170
15533.1	224	10043.6	123	165
15547.2	222	10052.7	133	172
15561.3	215	10061.8	136	177
15575.4	212	10070.9	135	171
15589.4	218	10080	143	168
15603.5	219	10089.1	143	178
15617.6	221	10098.2	131	182
15631.7	231	10107.3	137	153
15645.8	213	10116.4	126	182
15659.8	225	10125.5	120	160
15673.9	226	10134.6	137	172
15688	220	10143.8	133	166
15702.1	215	10152.9	135	170
15716.2	224	10162	117	169
15730.3	218	10171.1	131	168
15744.3	227	10180.2	139	156
15758.4	223	10189.3	136	166
15772.5	225	10198.4	142	175
15786.6	229	10207.5	125	172
15800.7	224	10216.6	134	176
15814.7	225	10225.7	132	174
15828.8	222	10234.8	126	175
15842.9	224	10243.9	132	176
15857	224	10253	132	162
15871.1	218	10262.1	122	157
15885.1	217	10271.2	139	156
15899.2	219	10280.3	121	177
15913.3	227	10289.4	142	163
15927.4	228	10298.5	139	186
15941.5	225	10307.6	132	171
15955.6	211	10316.7	135	165
15969.6	216	10325.8	146	168
15983.7	214	10334.9	137	169
15997.8	228	10344	121	167
16011.9	225	10353.2	140	172
16026	221	10362.3	135	161
16040	236	10371.4	121	172
16054.1	221	10380.5	134	180
16068.2	211	10389.6	129	168
16082.3	226	10398.7	131	174
16096.4	245	10407.8	135	166
16110.5	225	10416.9	138	164
16124.5	223	10426	139	171
16138.6	223	10435.1	125	165
16152.7	213	10444.2	137	165
16166.8	232	10453.3	124	172
16180.9	217	10462.4	139	173
16194.9	228	10471.5	138	178
16209	224	10480.6	124	174
16223.1	230	10489.7	133	172
16237.2	224	10498.8	128	177
16251.3	226	10507.9	113	164
16265.3	220	10517	132	166
16279.4	225	10526.1	133	174
16293.5	217	10535.2	141	161
16307.6	227	10544.3	121	149
16321.7	226	10553.4	128	162
16335.8	202	10562.5	137	175
16349.8	225	10571.7	121	182
16363.9	228	10580.8	142	170
16378	232	10589.9	134	174
16392.1	215	10599	135	170
16406.1	224	10608.1	133	164
16420.2	217	10617.2	135	168
16434.3	234	10626.3	126	172
16448.4	226	10635.4	128	163
16462.5	222	10644.5	124	161
16476.5	223	10653.6	138	173
16490.6	224	10662.7	128	151
16504.7	224	10671.8	138	178
16518.7	226	10680.9	139	175
16532.8	225	10690	129	183
16546.9	225	10699.1	142	179
16560.9	215	10708.2	134	162
16575	219	10717.3	126	166
16589.1	224	10726.4	120	169
16603.2	217	10735.5	140	161
16617.3	212	10744.6	114	179
16631.3	225	10753.7	125	170
16645.4	220	10762.8	129	179
16659.5	216	10771.9	127	171
16673.6	218	10781.1	129	159
16687.7	216	10790.2	128	173
16701.8	230	10799.3	131	158
16715.9	229	10808.4	130	171
16729.9	214	10817.5	124	156
16744	219	10826.6	131	162
16758.1	227	10835.7	122	161
16772.2	227	10844.8	127	182
16786.3	213	10853.9	129	179
16800.3	216	10863	139	177
16814.4	223	10872.1	129	153
16828.5	215	10881.2	123	178
16842.6	218	10890.3	126	168
16856.7	223	10899.4	123	174
16870.8	220	10908.5	123	169
16884.8	229	10917.6	128	160
16898.9	217	10926.7	110	166
16913	221	10935.8	120	171
16927.1	214	10944.9	122	171
16941.2	228	10954	116	166
16955.2	223	10963.1	129	177
16969.3	218	10972.2	129	172
16983.4	231	10981.3	134	165
16997.5	221	10990.4	120	168
17011.6	216	10999.5	118	168
17025.7	220	11008.6	121	165
17039.7	231	11017.7	130	169
17053.8	221	11026.8	140	168
17067.9	222	11036	124	168
17082	222	11045.1	126	182
17096.1	223	11054.2	118	167
17110.1	221	11063.3	120	165
17124.2	219	11072.4	148	180
17138.3	224	11081.5	129	163
17152.4	224	11090.6	114	181
17166.5	217	11099.7	128	170
17180.5	226	11108.8	121	167
17194.6	216	11117.9	126	174
17208.7	222	11127	117	162
17222.8	210	11136.1	123	164
17236.9	210	11145.2	127	171
17250.9	217	11154.3	130	162
17265	221	11163.4	133	168
17279.1	206	11172.5	123	162
17293.2	225	11181.6	124	162
17307.3	221	11190.7	119	166
17321.4	213	11199.8	121	165
17335.4	220	11208.9	121	169
17349.5	221	11218	129	168
17363.6	221	11227.1	118	154
17377.7	210	11236.2	117	163
17391.8	220	11245.3	138	167
17405.8	223	11254.5	116	171
17419.9	228	11263.6	126	166
17434	221	11272.7	127	166
17448.1	223	11281.8	125	162
17462.2	227	11290.9	129	166
17476.2	221	11300	123	175
17490.3	229	11309.1	121	174
17504.4	221	11318.2	132	166
17518.5	231	11327.3	130	162
17532.6	223	11336.4	121	172
17546.7	233	11345.5	127	165
17560.8	220	11354.6	118	182
17574.8	218	11363.7	127	161
17588.9	216	11372.8	124	172
17603	215	11381.9	125	162
17617.1	217	11391	129	178
17631.2	226	11400.1	123	172
17645.3	211	11409.2	121	162
17659.3	221	11418.3	127	176
17673.4	215	11427.4	124	165
17687.5	217	11436.6	115	171
17701.6	224	11445.7	111	151
17715.6	227	11454.8	118	164
17729.7	221	11463.9	128	182
17743.8	212	11473	117	159
17757.9	216	11482.1	124	183
17772	215	11491.2	130	168
17786	215	11500.3	122	172
17800.1	202	11509.4	114	168
17814.2	215	11518.5	135	170
17828.3	208	11527.6	131	171
17842.4	215	11536.7	120	166
17856.4	213	11545.8	117	160
17870.5	221	11554.9	114	184
17884.6	207	11564	121	165
17898.7	208	11573.1	124	183
17912.8	221	11582.2	127	174
17926.8	222	11591.3	120	164
17940.9	218	11600.4	115	171
17955	216	11609.5	118	175
17969.1	217	11618.6	135	186
17983.2	216	11627.7	126	183
17997.3	206	11636.8	104	168
18011.3	219	11645.9	116	174
18025.4	221	11655.1	139	175
18039.5	216	11664.2	124	168
18053.6	208	11673.3	122	171
18067.7	217	11682.4	117	162
18081.8	220	11691.5	138	173
18095.8	206	11700.6	114	168
18109.9	213	11709.7	118	174
18124	203	11718.8	119	163
18138.1	206	11727.9	138	169
18152.2	208	11737	121	155
18166.2	214	11746.1	123	174
18180.3	211	11755.2	110	163
18194.4	223	11764.3	131	164
18208.5	237	11773.4	130	166
18222.6	224	11782.5	118	172
18236.6	232	11791.6	123	166
18250.7	210	11800.7	107	158
18264.8	231	11809.8	120	166
18278.9	207	11818.9	118	161
18293	223	11828	124	161
18307	214	11837.1	119	171
18321.1	209	11846.2	128	167
18335.2	213	11855.4	123	169
18349.3	221	11864.5	118	165
18363.3	206	11873.6	123	175
18377.4	217	11882.7	119	173
18391.4	211	11891.8	118	168
18405.5	222	11900.9	110	163
18419.6	209	11910	119	170
18433.6	224	11919.1	120	159
18447.7	217	11928.2	112	163
18461.8	221	11937.3	134	163
18475.9	220	11946.4	111	169
18489.9	220	11955.5	125	181
18504	215	11964.6	120	167
18518.1	221	11973.7	117	174
18532.2	211	11982.8	125	167
18546.3	220	11991.9	122	171
18560.4	216	12001	123	179
18574.4	216	12010.1	128	162
18588.5	222	12019.2	116	180
18602.6	205	12028.4	122	159
18616.7	213	12037.5	125	162
18630.8	219	12046.6	104	177
18644.9	222	12055.7	111	171
18658.9	212	12064.8	120	153
18673	214	12073.9	117	168
18687.1	214	12083	111	173
18701.2	220	12092.1	111	158
18715.3	216	12101.2	112	172
18729.3	225	12110.3	118	180
18743.4	210	12119.4	118	164
18757.5	216	12128.5	116	165
18771.6	233	12137.6	125	167
18785.7	220	12146.7	119	168
18799.7	224	12155.8	107	173
18813.8	214	12164.9	121	166
18827.9	214	12174	114	175
18842	211	12183.1	129	169
18856.1	208	12192.2	132	161
18870.2	225	12201.3	127	176
18884.2	209	12210.4	113	161
18898.3	209	12219.5	117	178
18912.4	214	12228.6	96	169
18926.5	206	12237.7	126	172
18940.5	212	12246.8	110	169
18954.6	215	12255.9	124	155
18968.7	216	12265	110	161
18982.8	204	12274.1	114	159
18996.9	216	12283.2	108	171
19011	210	12292.4	115	169
19025.1	214	12301.5	121	179
19039.2	213	12310.6	111	157
19053.2	224	12319.7	122	168
19067.3	218	12328.8	109	163
19081.4	221	12337.9	117	170
19095.5	212	12347	110	162
19109.5	225	12356.1	112	169
19123.6	205	12365.2	117	167
19137.7	227	12374.3	114	170
19151.8	224	12383.4	116	165
19165.9	206	12392.5	101	169
19179.9	218	12401.6	120	175
19194	219	12410.7	123	169
19208.1	216	12419.8	117	171
19222.2	227	12428.9	104	170
19236.3	204	12438	115	163
19250.4	217	12447.1	118	165
19264.4	208	12456.2	117	162
19278.5	202	12465.3	113	177
19292.6	211	12474.4	106	165
19306.7	210	12483.5	117	164
19320.8	211	12492.6	111	168
19334.8	204	12501.7	119	169
19348.9	223	12510.8	113	168
19363	219	12520	121	175
19377.1	205	12529.1	104	174
19391.2	227	12538.2	115	163
19405.2	206	12547.3	113	170
19419.3	200	12556.4	109	186
19433.4	226	12565.5	118	179
19447.5	217	12574.6	119	156
19461.6	212	12583.7	110	179
19475.7	202	12592.8	99	166
19489.7	217	12601.9	109	160
19503.8	217	12611	122	164
19517.9	207	12620.1	114	181
19532	219	12629.2	112	171
19546	233	12638.3	119	169
19560.1	225	12647.4	115	174
19574.2	214	12656.5	121	169
19588.3	213	12665.6	109	166
19602.4	220	12674.7	116	170
19616.4	213	12683.8	112	154
19630.5	218	12692.9	120	165
19644.6	218	12702	126	166
19658.7	220	12711.1	118	166
19672.8	226	12720.2	105	171
19686.9	206	12729.3	123	169
19701	215	12738.4	112	163
19715	209	12747.5	100	171
19729.1	215	12756.6	118	179
19743.2	212	12765.7	106	169
19757.3	209	12774.8	103	157
19771.4	213	12783.9	107	175
19785.4	223	12793	109	164
19799.5	213	12802.1	113	171
19813.6	226	12811.2	113	163
19827.7	213	12820.3	103	170
19841.8	207	12829.4	110	164
19855.9	210	12838.5	101	172
19869.9	206	12847.6	123	165
19884	219	12856.7	98	173
19898.1	215	12865.8	103	161
19912.2	214	12874.9	122	165
19926.3	217	12884	113	176
19940.4	214	12893.1	116	164
19954.4	221	12902.2	111	170
19968.5	208	12911.3	103	169
19982.6	215	12920.4	109	176
19996.7	222	12929.5	101	168
20010.8	216	12938.6	110	169
20024.8	223	12947.8	111	172
20038.9	221	12956.9	113	169
20052.9	221	12966	111	167
20067	212	12975.1	96	174
20081.1	215	12984.2	120	162
20095.2	215	12993.3	110	157
20109.2	213	13002.4	101	171
20123.3	216	13011.4	111	176
20137.4	225	13020.6	113	169
20151.5	212	13029.7	112	172
20165.5	209	13038.8	110	174
20179.6	209	13047.9	124	171
20193.7	210	13057	124	164
20207.8	204	13066.1	105	160
20221.9	207	13075.2	105	163
20235.9	214	13084.3	107	161
20250	216	13093.4	113	166
20264.1	230	13102.5	102	175
20278.2	204	13111.6	113	171
20292.2	223	13120.7	106	170
20306.3	210	13129.8	118	170
20320.3	217	13138.9	121	157
20334.4	216	13148	113	168
20348.5	209	13157.1	108	153
20362.5	216	13166.2	106	167
20376.6	213	13175.3	113	158
20390.7	212	13184.4	92	168
20404.8	231	13193.5	116	167
20418.9	222	13202.6	101	163
20432.9	197	13211.7	102	175
20447	213	13220.8	120	163
20461.1	212	13229.9	115	175
20475.2	225	13239	100	163
20489.3	200	13248.1	106	170
20503.4	215	13257.2	123	169
20517.4	212	13266.3	98	158
20531.5	212	13275.4	112	170
20545.6	217	13284.5	97	173
20559.7	203	13293.6	103	159
20573.8	201	13302.7	109	166
20587.8	222	13311.8	112	166
20601.9	213	13320.9	117	169
20616	227	13330	97	173
20630.1	213	13339.1	101	169
20644.2	216	13348.2	103	171
20658.3	218	13357.3	120	172
20672.3	231	13366.4	114	179
20686.4	220	13375.5	117	167
20700.5	219	13384.7	96	167
20714.6	220	13393.8	111	166
20728.7	233	13402.9	104	166
20742.7	218	13412	118	172
20756.8	214	13421.1	109	159
20770.9	225	13430.2	115	167
20785	208	13439.3	102	171
20799.1	203	13448.4	107	173
20813.1	213	13457.5	106	168
20827.2	216	13466.6	103	163
20841.3	208	13475.7	113	175
20855.4	211	13484.8	106	162
20869.5	216	13493.9	102	173
20883.6	212	13503	102	168
20897.6	204	13512.1	110	162
20911.7	222	13521.2	110	170
20925.8	216	13530.3	104	170
20939.9	211	13539.4	92	173
20954	228	13548.5	105	159
20968	213	13557.6	107	172
20982.1	199	13566.7	117	177
20996.2	212	13575.8	105	158
21010.3	221	13584.9	112	173
21024.4	207	13594	112	171
21038.5	219	13603.1	121	166
21052.5	224	13612.2	115	176
21066.6	210	13621.3	103	164
21080.7	223	13630.4	99	164
21094.8	189	13639.5	108	168
21108.9	202	13648.6	110	181
21122.9	210	13657.7	100	169
21137	208	13666.8	98	172
21151.1	229	13675.9	107	164
21165.2	216	13685	105	179
21179.3	228	13694.1	107	156
21193.4	203	13703.2	109	166
21207.4	205	13712.3	118	170
21221.5	223	13721.4	99	171
21235.6	221	13730.5	111	175
21249.7	220	13739.6	103	150
21263.8	216	13748.8	101	164
21277.8	207	13757.9	116	176
21291.9	219	13767	103	181
21306	224	13776.1	95	171
21320.1	219	13785.2	118	179
21334.2	211	13794.3	106	169
21348.2	203	13803.4	104	156
21362.3	223	13812.5	102	174
21376.4	212	13821.6	101	171
21390.5	210	13830.7	92	161
21404.6	228	13839.8	100	172
21418.7	214	13848.9	101	182
21432.7	193	13858	107	174
21446.8	202	13867.1	99	170
21460.9	203	13876.2	117	170
21475	216	13885.3	102	158
21489.1	212	13894.4	101	175
21503.1	205	13903.5	118	167
21517.2	210	13912.6	96	161
21531.3	211	13921.7	110	158
21545.4	222	13930.8	120	149
21559.5	216	13939.9	98	154
21573.5	207	13949	103	167
21587.6	208	13958.1	110	173
21601.7	221	13967.2	99	165
21615.8	219	13976.3	108	180
21629.9	215	13985.4	99	157
21643.9	210	13994.5	115	177
21658	192	14003.6	87	178
21672.1	216	14012.8	111	156
21686.2	209	14021.9	98	162
21700.3	213	14031	106	168
21714.4	214	14040.1	116	160
21728.4	218	14049.2	106	173
21742.5	211	14058.3	90	157
21756.6	207	14067.4	104	175
21770.7	210	14076.5	102	176
21784.8	207	14085.6	106	167
21798.8	199	14094.7	105	174
21812.9	219	14103.8	114	168
21827	207	14112.9	94	161
21841.1	214	14122	117	172
21855.2	204	14131.1	98	174
21869.2	212	14140.2	102	176
21883.3	222	14149.3	101	169
21897.4	214	14158.4	96	165
21911.5	210	14167.5	106	167
21925.6	226	14176.6	95	163
21939.6	229	14185.7	99	171
21953.7	206	14194.8	106	166
21967.8	201	14203.9	116	173
21981.9	201	14213	109	160
21996	212	14222.1	106	162
22010.1	206	14231.2	107	176
22024.1	213	14240.3	98	176
22038.2	203	14249.5	106	164
22052.3	209	14258.6	94	163
22066.4	200	14267.7	98	172
22080.5	225	14276.8	101	178
22094.5	208	14285.9	105	172
22108.6	228	14295	112	167
22122.7	200	14304.1	107	161
22136.8	221	14313.2	99	176
22150.9	217	14322.3	93	165
22165	205	14331.4	104	174
22179	217	14340.5	96	182
22193.1	220	14349.6	105	175
22207.2	208	14358.7	98	170
22221.2	209	14367.8	98	178
22235.3	214	14376.9	110	168
22249.4	213	14386	104	179
22263.4	210	14395.1	99	168
22277.5	208	14404.2	88	172
22291.5	216	14413.3	106	167
22305.6	210	14422.4	105	165
22319.7	204	14431.5	112	161
22333.7	215	14440.6	105	174
22347.8	206	14449.7	86	165
22361.9	211	14458.8	113	180
22376	197	14468	108	165
22390.1	208	14477.1	105	156
22404.1	203	14486.2	98	169
22418.2	211	14495.3	114	165
22432.3	218	14504.4	97	161
		14513.5	98	158
		14522.6	103	171
		14531.7	107	170
		14540.8	105	164
		14549.9	118	170
		14559	99	151
		14568.1	98	151
		14577.2	96	166
		14586.3	99	166
		14595.4	116	177
		14604.5	105	160
		14613.6	99	162
		14622.7	98	178
		14631.8	90	168
		14640.9	92	158
		14650	95	173
		14659.1	94	176
		14668.2	98	168
		14677.3	97	182
		14686.4	100	162
		14695.5	106	169
		14704.6	107	162
		14713.7	110	167
		14722.8	98	171
		14731.9	112	158
		14741	103	173
		14750.1	109	174
		14759.2	98	169
		14768.3	101	162
		14777.4	85	165
		14786.5	105	177
		14795.6	95	173
		14804.7	87	176
		14813.8	98	166
		14823	85	177
		14832.1	104	173
		14841.2	98	160
		14850.3	96	168
		14859.4	99	170
		14868.5	94	164
		14877.6	106	172
		14886.7	88	160
		14895.8	99	163
		14904.9	90	165
		14914	111	166
		14923.1	94	162
		14932.2	92	164
		14941.3	107	168
		14950.4	104	160
		14959.5	97	182
		14968.6	95	166
		14977.7	98	154
		14986.8	111	171
		14995.9	91	164
		15005	111	166
		15014.1	92	169
		15023.2	98	167
		15032.3	94	169
		15041.4	109	172
		15050.6	94	167
		15059.7	111	158
		15068.8	101	157
		15077.9	114	168
		15087	93	160
		15096.1	100	171
		15105.2	95	168
		15114.3	113	170
		15123.4	101	161
		15132.5	105	158
		15141.6	108	174
		15150.7	105	169
		15159.8	103	161
		15168.9	108	165
		15178	106	160
		15187.1	91	172
		15196.2	102	163
		15205.3	119	160
		15214.4	107	169
		15223.5	92	175
		15232.6	98	179
		15241.8	99	159
		15250.9	97	168
		15260	87	162
		15269.1	91	183
		15278.2	113	175
		15287.3	98	173
		15296.4	102	148
		15305.5	101	175
		15314.6	99	180
		15323.7	98	166
		15332.8	85	165
		15341.9	87	151
		15351	104	180
		15360.1	110	174
		15369.2	83	168
		15378.3	88	175
		15387.5	97	179
		15396.5	91	172
		15405.7	107	178
		15414.8	93	170
		15423.9	88	168
		15433	104	161
		15442.1	105	168
		15451.2	110	171
		15460.3	98	154
		15469.4	97	165
		15478.5	97	183
		15487.6	88	160
		15496.7	106	161
		15505.8	93	175
		15514.9	93	169
		15524	76	173
		15533.1	107	171
		15542.2	82	171
		15551.3	96	168
		15560.4	104	168
		15569.5	100	166
		15578.6	96	158
		15587.7	97	163
		15596.8	107	175
		15605.9	89	161
		15615	99	158
		15624.1	91	173
		15633.2	83	170
		15642.3	95	180
		15651.5	101	170
		15660.6	83	165
		15669.7	96	172
		15678.8	81	166
		15687.9	85	169
		15697	89	172
		15706.1	93	167
		15715.2	86	171
		15724.3	92	170
		15733.4	98	168
		15742.5	93	169
		15751.6	79	178
		15760.7	88	168
		15769.8	107	178
		15778.9	103	177
		15788	89	170
		15797.2	88	164
		15806.3	103	166
		15815.4	88	166
		15824.5	79	172
		15833.6	85	174
		15842.7	94	159
		15851.8	95	170
		15860.9	95	162
		15870	88	163
		15879.1	94	169
		15888.2	84	163
		15897.3	102	159
		15906.4	99	174
		15915.5	77	178
		15924.6	101	182
		15933.7	102	173
		15942.8	96	171
		15952	90	161
		15961.1	95	160
		15970.2	84	158
		15979.3	73	176
		15988.4	95	172
		15997.5	94	177
		16006.6	82	168
		16015.7	106	147
		16024.8	95	172
		16033.9	99	155
		16043	94	176
		16052.1	111	164
		16061.2	96	163
		16070.3	78	160
		16079.4	88	165
		16088.5	101	169
		16097.6	82	160
		16106.7	91	161
		16115.8	87	169
		16124.9	96	167
		16134	96	175
		16143.1	105	174
		16152.2	104	174
		16161.3	88	163
		16170.4	90	159
		16179.5	95	164
		16188.6	88	171
		16197.8	94	169
		16206.9	95	163
		16216	94	160
		16225.1	98	169
		16234.2	107	168
		16243.3	92	167
		16252.4	95	164
		16261.5	90	159
		16270.6	91	166
		16279.7	98	168
		16288.8	106	157
		16297.9	103	171
		16307	90	161
		16316.1	83	161
		16325.2	91	160
		16334.3	97	177
		16343.4	89	174
		16352.5	96	174
		16361.6	88	166
		16370.7	77	165
		16379.8	92	181
		16388.9	89	176
		16398	86	163
		16407.1	84	165
		16416.2	88	166
		16425.3	110	165
		16434.4	75	170
		16443.5	102	165
		16452.6	104	160
		16461.7	98	171
		16470.8	92	170
		16479.9	68	171
		16489	84	177
		16498.1	89	162
		16507.2	110	168
		16516.3	86	171
		16525.4	97	171
		16534.5	98	169
		16543.6	87	178
		16552.7	85	176
		16561.8	89	167
		16570.9	84	172
		16580	93	169
		16589.1	101	174
		16598.3	80	161
		16607.4	100	170
		16616.5	75	170
		16625.6	86	170
		16634.7	101	178
		16643.8	101	166
		16652.9	97	162
		16662	90	160
		16671.1	89	180
		16680.2	86	164
		16689.3	100	157
		16698.4	93	174
		16707.5	83	164
		16716.6	74	158
		16725.7	83	176
		16734.8	97	163
		16743.9	97	164
		16753	93	155
		16762.1	105	158
		16771.2	85	166
		16780.3	69	178
		16789.4	75	175
		16798.5	93	167
		16807.6	94	166
		16816.7	99	173
		16825.8	99	182
		16834.9	96	164
		16844	94	176
		16853.1	94	175
		16862.2	95	159
		16871.3	83	164
		16880.4	73	163
		16889.5	81	166
		16898.6	80	165
		16907.7	87	167
		16916.8	101	156
		16925.9	89	157
		16935	86	169
		16944.1	90	157
		16953.2	97	165
		16962.3	102	168
		16971.4	91	182
		16980.5	95	166
		16989.6	92	167
		16998.7	94	178
		17007.8	84	179
		17016.9	70	168
		17026.1	74	162
		17035.2	74	152
		17044.3	80	179
		17053.4	86	155
		17062.5	83	176
		17071.6	83	165
		17080.7	88	173
		17089.8	101	164
		17098.9	81	168
		17108	95	165
		17117.1	80	158
		17126.2	82	158
		17135.3	87	168
		17144.4	88	167
		17153.5	83	172
		17162.6	81	170
		17171.7	77	168
		17180.8	82	172
		17189.9	75	163
		17199	76	165
		17208.1	91	164
		17217.2	94	161
		17226.3	83	173
		17235.4	92	165
		17244.5	82	148
		17253.6	78	171
		17262.7	88	166
		17271.8	101	168
		17280.9	87	163
		17290	78	167
		17299.1	84	171
		17308.2	88	158
		17317.3	86	168
		17326.4	77	169
		17335.5	66	158
		17344.6	97	166
		17353.7	89	169
		17362.8	85	161
		17371.9	91	156
		17381	98	164
		17390.1	77	172
		17399.2	90	173
		17408.3	86	172
		17417.4	95	181
		17426.5	89	166
		17435.6	87	167
		17444.7	83	165
		17453.8	87	156
		17462.9	76	171
		17472	83	158
		17481.2	93	175
		17490.3	74	167
		17499.4	74	164
		17508.5	91	173
		17517.6	81	176
		17526.7	77	172
		17535.8	91	172
		17544.9	104	165
		17554	85	160
		17563.1	79	174
		17572.2	88	171
		17581.3	80	176
		17590.4	85	172
		17599.5	77	176
		17608.6	97	161
		17617.7	88	162
		17626.8	88	159
		17635.9	89	170
		17645	88	164
		17654.1	90	165
		17663.2	86	170
		17672.3	79	162
		17681.4	90	170
		17690.5	75	163
		17699.6	75	164
		17708.7	83	160
		17717.8	94	158
		17726.9	78	166
		17736	83	161
		17745.1	70	165
		17754.2	85	165
		17763.3	86	162
		17772.4	95	167
		17781.5	80	170
		17790.6	86	172
		17799.7	85	175
		17808.8	82	171
		17817.9	98	179
		17827	92	162
		17836.1	94	180
		17845.2	91	166
		17854.3	90	170
		17863.4	91	178
		17872.5	92	159
		17881.6	92	162
		17890.7	86	177
		17899.8	72	155
		17909	87	168
		17918	88	161
		17927.2	74	176
		17936.2	91	167
		17945.4	90	169
		17954.5	82	151
		17963.6	71	181
		17972.7	70	169
		17981.7	84	176
		17990.8	97	168
		17999.9	82	171
		18009.1	78	167
		18018.2	87	170
		18027.3	84	162
		18036.4	83	168
		18045.5	92	164
		18054.6	83	168
		18063.7	86	174
		18072.8	86	168
		18081.9	80	156
		18091	83	167
		18100.1	80	173
		18109.2	85	178
		18118.3	77	166
		18127.5	85	176
		18136.6	84	161
		18145.7	89	166
		18154.8	85	168
		18163.9	80	171
		18173	83	168
		18182.1	82	165
[truncated: 447 more rows]
