# Supplementary material for: ARL3 activation requires the co-GEF BART and effector-mediated turnover
Source: eLife. 2021 Jan 13;10:e64624. doi: 10.7554/eLife.64624 (PMC7817177; doi:10.7554/eLife.64624)
Supplement: Figure 2—source data 1. [file elife-64624-fig2-data1.xlsx]

## Sheet: Sheet1
	2uM truncArl3mD +150uM GppNHp
time	intrinsic	time	+2uM 13B
0	258	0	219
7.495	255	5.856	215
14.995	259	11.701	203
22.499	254	17.547	172
30.01	255	23.388	148
37.518	263	29.227	136
45.021	258	35.073	120
52.529	258	40.925	111
60.031	258	46.786	112
67.546	259	52.622	87
75.061	255	58.49	90
82.557	254	64.357	82
90.05	255	70.223	87
97.544	259	76.083	84
105.044	252	81.947	71
112.545	249	87.786	72
120.044	253	93.634	78
127.54	257	99.479	79
135.035	252	105.329	65
142.528	253	111.174	64
150.032	251	117.012	65
157.532	254	122.862	62
165.029	258	128.713	66
172.525	248	134.567	54
180.029	249	140.424	65
187.543	255	146.276	64
195.048	247	152.124	67
202.539	253	157.976	67
210.051	257	163.828	59
217.543	252	169.671	65
225.046	247	175.515	64
232.547	243	181.356	66
240.065	253	187.201	58
247.56	251	193.047	56
255.066	248	198.897	58
262.57	244	204.758	55
270.085	256	210.624	55
277.584	250	216.482	57
285.086	253	222.331	60
292.58	253	228.186	56
300.074	247	234.035	52
307.573	252	239.885	53
315.072	252	245.73	50
322.562	251	251.58	66
330.061	249	257.421	58
337.563	252	263.277	70
345.071	251	269.116	64
352.57	246	274.974	61
360.079	245	280.838	59
367.587	245	286.699	63
375.08	250	292.569	60
382.583	243	298.434	54
390.077	246	304.294	69
397.577	252	310.145	56
405.076	239	315.996	52
412.568	242	321.85	53
420.072	248	327.693	59
427.57	244	333.546	59
435.075	250	339.398	53
442.568	246	345.242	56
450.05	249	351.085	52
457.544	244	356.939	58
465.053	245	362.791	56
472.564	240	368.648	62
480.078	241	374.504	57
487.593	245	380.357	54
495.105	245	386.202	57
502.603	240	392.055	56
510.126	243	397.913	58
517.643	245	403.762	53
525.143	243	409.612	61
532.642	239	415.455	59
540.143	235	421.307	52
547.638	239	427.148	51
555.131	235	432.998	53
562.619	239	438.848	51
570.116	246	444.709	61
577.61	239	450.561	60
585.114	236	456.427	61
592.617	239	462.282	58
600.127	238	468.131	59
607.626	244	473.982	63
615.117	240	479.83	53
622.611	237	485.685	59
630.115	238	491.525	58
637.622	235	497.378	64
645.121	230	503.216	44
652.611	231	509.077	53
660.107	227	514.931	56
667.611	237	520.809	47
675.111	240	526.68	57
682.607	230	532.54	58
690.104	240	538.389	50
697.607	235	544.24	54
705.112	238	550.101	52
712.615	236	555.963	61
720.131	229	561.825	50
727.638	237	567.672	58
735.14	240	573.519	53
742.634	236	579.359	56
750.152	229	585.21	51
757.658	236	591.052	52
765.16	238	596.904	57
772.657	234	602.752	52
780.157	234	608.609	55
787.659	225	614.475	58
795.166	237	620.332	67
802.66	229	626.175	60
		632.026	60
		637.872	47
		643.731	60
		649.575	43
		655.426	61
		661.266	49
		667.105	49
		672.957	60
		678.819	54
		684.686	50
		690.542	55
		696.397	53
		702.25	57
		708.116	54
		713.965	50
		719.821	47
		725.662	48
		731.509	46
		737.363	61
		743.215	49
		749.069	47
		754.91	52
		760.768	50
		766.625	53
		772.493	58
		778.347	53
		784.199	49
		790.046	59
		795.894	58
		801.757	50
		807.601	46
		813.454	60
		819.296	62
		825.149	54
