# Supplementary material for: ARL3 activation requires the co-GEF BART and effector-mediated turnover
Source: eLife. 2021 Jan 13;10:e64624. doi: 10.7554/eLife.64624 (PMC7817177; doi:10.7554/eLife.64624)
Supplement: Figure 2—source data 2. [file elife-64624-fig2-data2.xlsx]

## Sheet: Sheet1
			Pellet				Supernatant
	[LUVs]
ARL3GDP	0	0	0	0		100	100	100
ARL3GDP	1mM	3.73286	1.23833	1.57492		96.2671	98.7617	98.4251
ARL3GppNHp	0	0	0	0		100	100	100
ARL3GppNHp	1mM	18.7591	34.8414	18.572		81.2409	65.1586	81.428
