# Supplementary material for: ARL3 activation requires the co-GEF BART and effector-mediated turnover
Source: eLife. 2021 Jan 13;10:e64624. doi: 10.7554/eLife.64624 (PMC7817177; doi:10.7554/eLife.64624)
Supplement: Figure 2—source data 3. [file elife-64624-fig2-data3.xlsx]

## Sheet: Sheet1
	no LUVs	264	1 mM	244		3mM	264
0	252	0.954545	235	0.963115	0	260	0.984848
6.006	238	0.901515	239	0.979508	5.998	249	0.943182
12.012	248	0.939394	235	0.963115	12.038	263	0.996212
18.023	260	0.984848	240	0.983607	18.088	264	1
24.031	251	0.950758	238	0.97541	24.138	264	1
30.053	237	0.897727	237	0.971311	30.178	252	0.954545
36.056	251	0.950758	243	0.995902	36.214	259	0.981061
42.07	244	0.924242	242	0.991803	42.252	250	0.94697
48.083	253	0.958333	235	0.963115	48.287	259	0.981061
54.105	237	0.897727	235	0.963115	54.322	253	0.958333
60.114	242	0.916667	237	0.971311	60.353	248	0.939394
66.128	249	0.943182	240	0.983607	66.386	247	0.935606
72.152	238	0.901515	233	0.954918	72.424	255	0.965909
78.172	241	0.912879	230	0.942623	78.463	252	0.954545
84.198	245	0.92803	239	0.979508	84.506	259	0.981061
90.213	256	0.969697	232	0.95082	90.55	253	0.958333
96.239	242	0.916667	239	0.979508	96.587	247	0.935606
102.254	248	0.939394	234	0.959016	102.618	248	0.939394
108.262	247	0.935606	244	1	108.648	252	0.954545
114.274	245	0.92803	234	0.959016	114.677	250	0.94697
120.279	252	0.954545	233	0.954918	120.707	252	0.954545
126.286	248	0.939394	234	0.959016	126.74	253	0.958333
132.298	244	0.924242	231	0.946721	132.769	243	0.920455
138.318	233	0.882576	235	0.963115	138.809	252	0.954545
144.32	253	0.958333	229	0.938525	144.849	258	0.977273
150.335	246	0.931818	229	0.938525	150.893	247	0.935606
156.351	253	0.958333	230	0.942623	156.937	250	0.94697
162.368	264	1	223	0.913934	162.976	247	0.935606
168.37	247	0.935606	232	0.95082	169.023	257	0.973485
174.393	237	0.897727	239	0.979508	175.066	245	0.92803
180.409	237	0.897727	229	0.938525	181.104	246	0.931818
186.43	248	0.939394	227	0.930328	187.145	246	0.931818
192.446	240	0.909091	225	0.922131	193.19	250	0.94697
198.467	256	0.969697	234	0.959016	199.234	247	0.935606
204.49	252	0.954545	223	0.913934	205.27	236	0.893939
210.516	243	0.920455	221	0.905738	211.305	245	0.92803
216.531	239	0.905303	217	0.889344	217.341	251	0.950758
222.551	258	0.977273	229	0.938525	223.378	249	0.943182
228.563	244	0.924242	231	0.946721	229.412	249	0.943182
234.58	247	0.935606	226	0.92623	235.452	252	0.954545
240.598	240	0.909091	231	0.946721	241.483	240	0.909091
246.611	252	0.954545	217	0.889344	247.521	252	0.954545
252.624	243	0.920455	227	0.930328	253.556	240	0.909091
258.634	251	0.950758	231	0.946721	259.595	245	0.92803
264.65	244	0.924242	230	0.942623	265.638	249	0.943182
270.67	245	0.92803	232	0.95082	271.688	247	0.935606
276.685	239	0.905303	227	0.930328	277.724	252	0.954545
282.703	252	0.954545	223	0.913934	283.757	248	0.939394
288.722	239	0.905303	226	0.92623	289.81	242	0.916667
294.752	242	0.916667	227	0.930328	295.863	250	0.94697
300.777	252	0.954545	237	0.971311	301.928	241	0.912879
306.801	247	0.935606	232	0.95082	307.976	239	0.905303
312.831	249	0.943182	235	0.963115	314.019	251	0.950758
318.844	245	0.92803	214	0.877049	320.063	244	0.924242
324.859	247	0.935606	226	0.92623	326.099	237	0.897727
330.882	251	0.950758	229	0.938525	332.146	243	0.920455
336.898	243	0.920455	233	0.954918	338.183	239	0.905303
342.911	247	0.935606	234	0.959016	344.214	239	0.905303
348.929	253	0.958333	230	0.942623	350.242	240	0.909091
354.947	248	0.939394	226	0.92623	356.27	246	0.931818
360.956	242	0.916667	236	0.967213	362.295	242	0.916667
366.963	244	0.924242	218	0.893443	368.321	244	0.924242
372.975	254	0.962121	227	0.930328	374.352	239	0.905303
378.984	254	0.962121	226	0.92623	380.382	240	0.909091
384.996	240	0.909091	228	0.934426	386.41	234	0.886364
391.01	242	0.916667	228	0.934426	392.441	245	0.92803
397.022	245	0.92803	227	0.930328	398.473	246	0.931818
403.037	247	0.935606	228	0.934426	404.508	237	0.897727
409.053	240	0.909091	229	0.938525	410.538	236	0.893939
415.07	245	0.92803	228	0.934426	416.568	239	0.905303
421.082	247	0.935606	235	0.963115	422.601	243	0.920455
427.103	248	0.939394	221	0.905738	428.633	248	0.939394
433.117	242	0.916667	231	0.946721	434.662	247	0.935606
439.137	243	0.920455	235	0.963115	440.694	237	0.897727
445.155	259	0.981061	229	0.938525	446.732	241	0.912879
451.173	242	0.916667	226	0.92623	452.763	230	0.871212
457.196	250	0.94697	231	0.946721	458.794	242	0.916667
463.212	252	0.954545	233	0.954918	464.834	233	0.882576
469.217	246	0.931818	225	0.922131	470.871	245	0.92803
475.225	244	0.924242	222	0.909836	476.913	238	0.901515
481.235	244	0.924242	215	0.881148	482.951	239	0.905303
487.254	250	0.94697	224	0.918033	488.999	234	0.886364
493.279	250	0.94697	225	0.922131	495.045	230	0.871212
499.297	233	0.882576	231	0.946721	501.092	236	0.893939
505.318	240	0.909091	226	0.92623	507.138	235	0.890152
511.326	241	0.912879	232	0.95082	513.179	234	0.886364
517.326	242	0.916667	235	0.963115	519.215	235	0.890152
523.344	249	0.943182	225	0.922131	525.24	231	0.875
529.383	242	0.916667	228	0.934426	531.275	241	0.912879
535.401	239	0.905303	223	0.913934	537.304	242	0.916667
541.418	244	0.924242	235	0.963115	543.351	243	0.920455
547.432	235	0.890152	225	0.922131	549.39	229	0.867424
553.459	239	0.905303	225	0.922131	555.419	241	0.912879
559.473	246	0.931818	219	0.897541	561.46	233	0.882576
565.497	249	0.943182	229	0.938525	567.501	225	0.852273
571.507	252	0.954545	224	0.918033	573.54	234	0.886364
577.523	246	0.931818	223	0.913934	579.578	237	0.897727
583.538	244	0.924242	234	0.959016	585.61	237	0.897727
589.554	228	0.863636	223	0.913934	591.643	226	0.856061
595.563	246	0.931818	228	0.934426	597.679	226	0.856061
601.583	234	0.886364	233	0.954918	603.71	227	0.859848
607.594	244	0.924242	236	0.967213	609.748	233	0.882576
613.602	245	0.92803	223	0.913934	615.786	229	0.867424
619.609	242	0.916667	222	0.909836	621.827	242	0.916667
625.623	246	0.931818	231	0.946721	627.861	236	0.893939
631.644	241	0.912879	222	0.909836	633.898	227	0.859848
637.66	252	0.954545	233	0.954918	639.94	226	0.856061
643.672	240	0.909091	228	0.934426	645.977	226	0.856061
649.684	238	0.901515	237	0.971311	652.007	242	0.916667
655.695	236	0.893939	215	0.881148	658.046	235	0.890152
661.709	249	0.943182	218	0.893443	664.087	230	0.871212
667.724	252	0.954545	232	0.95082	670.133	238	0.901515
673.746	248	0.939394	222	0.909836	676.168	229	0.867424
679.755	239	0.905303	228	0.934426	682.191	229	0.867424
685.771	238	0.901515	221	0.905738	688.235	241	0.912879
691.788	235	0.890152	227	0.930328	694.27	227	0.859848
697.811	250	0.94697	229	0.938525	700.303	219	0.829545
703.827	240	0.909091	238	0.97541	706.341	234	0.886364
709.846	243	0.920455	217	0.889344	712.374	222	0.840909
715.858	250	0.94697	216	0.885246	718.415	224	0.848485
721.861	235	0.890152	220	0.901639	724.456	225	0.852273
727.865	237	0.897727	226	0.92623	730.483	230	0.871212
733.874	248	0.939394	221	0.905738	736.513	220	0.833333
739.886	249	0.943182	229	0.938525	742.54	227	0.859848
745.894	227	0.859848	229	0.938525	748.57	229	0.867424
751.899	245	0.92803	226	0.92623	754.604	222	0.840909
757.9	250	0.94697	221	0.905738	760.634	223	0.844697
763.898	246	0.931818	227	0.930328	766.662	226	0.856061
769.914	238	0.901515	230	0.942623	772.695	224	0.848485
775.92	238	0.901515	237	0.971311	778.725	230	0.871212
781.931	246	0.931818	235	0.963115	784.758	224	0.848485
787.935	235	0.890152	227	0.930328	790.804	231	0.875
793.94	235	0.890152	241	0.987705	796.851	224	0.848485
799.948	247	0.935606	221	0.905738	802.892	234	0.886364
805.96	240	0.909091	222	0.909836	808.932	225	0.852273
811.976	239	0.905303	212	0.868852	814.976	232	0.878788
817.98	254	0.962121	225	0.922131	821.021	233	0.882576
823.987	244	0.924242	241	0.987705	827.061	227	0.859848
829.995	241	0.912879	235	0.963115	833.104	224	0.848485
835.996	249	0.943182	223	0.913934	839.146	227	0.859848
842.008	252	0.954545	219	0.897541	845.18	231	0.875
848.015	242	0.916667	229	0.938525	851.211	228	0.863636
854.025	243	0.920455	226	0.92623	857.247	237	0.897727
860.028	234	0.886364	229	0.938525	863.284	223	0.844697
866.032	237	0.897727	224	0.918033	869.314	221	0.837121
872.041	243	0.920455	229	0.938525	875.35	221	0.837121
878.043	240	0.909091	223	0.913934	881.385	230	0.871212
884.051	238	0.901515	218	0.893443	887.414	233	0.882576
890.068	240	0.909091	222	0.909836	893.441	221	0.837121
896.092	254	0.962121	220	0.901639	899.484	217	0.82197
902.112	242	0.916667	231	0.946721	905.515	219	0.829545
908.123	244	0.924242	233	0.954918	911.564	221	0.837121
914.141	244	0.924242	231	0.946721	917.614	230	0.871212
920.154	239	0.905303	224	0.918033	923.648	230	0.871212
926.171	239	0.905303	219	0.897541	929.684	224	0.848485
932.182	243	0.920455	229	0.938525	935.739	229	0.867424
938.192	242	0.916667	216	0.885246	941.772	225	0.852273
944.206	238	0.901515	217	0.889344	947.817	223	0.844697
950.213	243	0.920455	217	0.889344	953.856	219	0.829545
956.229	238	0.901515	231	0.946721	959.902	229	0.867424
962.246	246	0.931818	221	0.905738	965.94	229	0.867424
968.252	242	0.916667	231	0.946721	971.972	226	0.856061
974.255	247	0.935606	226	0.92623	978.005	224	0.848485
980.257	239	0.905303	216	0.885246	984.038	228	0.863636
986.258	234	0.886364	222	0.909836	990.07	216	0.818182
992.268	241	0.912879	225	0.922131	996.104	222	0.840909
998.283	250	0.94697	227	0.930328	1002.14	232	0.878788
1004.29	241	0.912879	216	0.885246	1008.17	222	0.840909
1010.3	228	0.863636	222	0.909836	1014.2	223	0.844697
1016.32	253	0.958333	206	0.844262	1020.23	226	0.856061
1022.33	237	0.897727	221	0.905738	1026.27	220	0.833333
1028.35	244	0.924242	218	0.893443	1032.3	219	0.829545
1034.38	250	0.94697	228	0.934426	1038.33	219	0.829545
1040.39	237	0.897727	223	0.913934	1044.36	226	0.856061
1046.4	239	0.905303	225	0.922131	1050.39	226	0.856061
1052.42	248	0.939394	236	0.967213	1056.43	220	0.833333
1058.43	235	0.890152	227	0.930328	1062.46	221	0.837121
1064.44	259	0.981061	230	0.942623	1068.5	223	0.844697
1070.46	246	0.931818	215	0.881148	1074.54	222	0.840909
1076.47	243	0.920455	230	0.942623	1080.57	223	0.844697
1082.48	239	0.905303	224	0.918033	1086.61	219	0.829545
1088.48	233	0.882576	220	0.901639	1092.64	222	0.840909
1094.49	239	0.905303	222	0.909836	1098.66	224	0.848485
1100.49	234	0.886364	219	0.897541	1104.69	223	0.844697
1106.52	242	0.916667	232	0.95082	1110.72	231	0.875
1112.53	245	0.92803	227	0.930328	1116.76	214	0.810606
1118.55	247	0.935606	221	0.905738	1122.8	213	0.806818
1124.57	239	0.905303	225	0.922131	1128.84	232	0.878788
1130.59	249	0.943182	219	0.897541	1134.88	219	0.829545
1136.61	240	0.909091	218	0.893443	1140.9	220	0.833333
1142.63	243	0.920455	211	0.864754	1146.94	216	0.818182
1148.65	228	0.863636	223	0.913934	1152.97	225	0.852273
1154.66	247	0.935606	224	0.918033	1159	219	0.829545
1160.68	236	0.893939	226	0.92623	1165.04	226	0.856061
1166.69	242	0.916667	217	0.889344	1171.07	213	0.806818
1172.7	242	0.916667	221	0.905738	1177.1	225	0.852273
1178.72	244	0.924242	224	0.918033	1183.13	219	0.829545
1184.73	231	0.875	226	0.92623	1189.16	226	0.856061
1190.74	250	0.94697	216	0.885246	1195.2	228	0.863636
1196.75	245	0.92803	222	0.909836	1201.23	217	0.82197
1202.77	241	0.912879	223	0.913934	1207.28	217	0.82197
1208.77	240	0.909091	224	0.918033	1213.33	232	0.878788
1214.78	245	0.92803	217	0.889344	1219.36	220	0.833333
1220.79	238	0.901515	220	0.901639	1225.4	226	0.856061
1226.81	241	0.912879	215	0.881148	1231.43	219	0.829545
1232.82	232	0.878788	222	0.909836	1237.47	215	0.814394
1238.84	241	0.912879	220	0.901639	1243.5	228	0.863636
1244.85	239	0.905303	224	0.918033	1249.54	214	0.810606
1250.88	235	0.890152	224	0.918033	1255.57	220	0.833333
1256.89	245	0.92803	228	0.934426	1261.61	219	0.829545
1262.91	239	0.905303	229	0.938525	1267.64	214	0.810606
1268.93	244	0.924242	223	0.913934	1273.67	221	0.837121
1274.95	234	0.886364	214	0.877049	1279.71	223	0.844697
1280.97	231	0.875	217	0.889344	1285.76	217	0.82197
1286.98	238	0.901515	223	0.913934	1291.79	220	0.833333
1293	241	0.912879	217	0.889344	1297.83	223	0.844697
1299.01	252	0.954545	225	0.922131	1303.87	211	0.799242
1305.03	236	0.893939	229	0.938525	1309.91	214	0.810606
1311.06	242	0.916667	230	0.942623	1315.97	214	0.810606
1317.09	243	0.920455	228	0.934426	1322.02	216	0.818182
1323.12	246	0.931818	220	0.901639	1328.07	217	0.82197
1329.14	229	0.867424	229	0.938525	1334.12	205	0.776515
1335.15	255	0.965909	221	0.905738	1340.17	223	0.844697
1341.16	230	0.871212	221	0.905738	1346.22	219	0.829545
1347.16	253	0.958333	232	0.95082	1352.26	213	0.806818
1353.18	236	0.893939	220	0.901639	1358.29	225	0.852273
1359.19	241	0.912879	221	0.905738	1364.32	216	0.818182
1365.21	244	0.924242	225	0.922131	1370.35	219	0.829545
1371.22	239	0.905303	224	0.918033	1376.38	220	0.833333
1377.23	242	0.916667	223	0.913934	1382.41	216	0.818182
1383.23	231	0.875	222	0.909836	1388.44	219	0.829545
1389.24	236	0.893939	217	0.889344	1394.47	220	0.833333
1395.25	242	0.916667	213	0.872951	1400.5	220	0.833333
1401.26	236	0.893939	223	0.913934	1406.53	223	0.844697
1407.27	242	0.916667	222	0.909836	1412.56	224	0.848485
1413.27	245	0.92803	219	0.897541	1418.59	220	0.833333
1419.28	236	0.893939	228	0.934426	1424.62	220	0.833333
1425.3	240	0.909091	224	0.918033	1430.66	230	0.871212
1431.31	237	0.897727	226	0.92623	1436.7	212	0.80303
