# Supplementary material for: ARL3 activation requires the co-GEF BART and effector-mediated turnover
Source: eLife. 2021 Jan 13;10:e64624. doi: 10.7554/eLife.64624 (PMC7817177; doi:10.7554/eLife.64624)
Supplement: Figure 2—source data 4. [file elife-64624-fig2-data4.xlsx]

## Sheet: LUVs
	3mM	291	3mM+13B	264
0	291	1	260	0.984848
5.998	286	0.982818	249	0.943182
12.038	278	0.955326	263	0.996212
18.088	278	0.955326	264	1
24.138	283	0.972509	264	1
30.178	287	0.986254	252	0.954545
36.214	284	0.975945	259	0.981061
42.252	286	0.982818	250	0.94697
48.287	285	0.979381	259	0.981061
54.322	282	0.969072	253	0.958333
60.353	287	0.986254	248	0.939394
66.386	281	0.965636	247	0.935606
72.424	277	0.95189	255	0.965909
78.463	278	0.955326	252	0.954545
84.506	291	1	259	0.981061
90.55	283	0.972509	253	0.958333
96.587	276	0.948454	247	0.935606
102.618	284	0.975945	248	0.939394
108.648	289	0.993127	252	0.954545
114.677	286	0.982818	250	0.94697
120.707	276	0.948454	252	0.954545
126.74	270	0.927835	253	0.958333
132.769	277	0.95189	243	0.920455
138.809	273	0.938144	252	0.954545
144.849	271	0.931271	258	0.977273
150.893	280	0.962199	247	0.935606
156.937	271	0.931271	250	0.94697
162.976	277	0.95189	247	0.935606
169.023	279	0.958763	257	0.973485
175.066	269	0.924399	245	0.92803
181.104	280	0.962199	246	0.931818
187.145	275	0.945017	246	0.931818
193.19	270	0.927835	250	0.94697
199.234	267	0.917526	247	0.935606
205.27	273	0.938144	236	0.893939
211.305	270	0.927835	245	0.92803
217.341	275	0.945017	251	0.950758
223.378	262	0.900344	249	0.943182
229.412	266	0.914089	249	0.943182
235.452	265	0.910653	252	0.954545
241.483	265	0.910653	240	0.909091
247.521	270	0.927835	252	0.954545
253.556	272	0.934708	240	0.909091
259.595	265	0.910653	245	0.92803
265.638	271	0.931271	249	0.943182
271.688	259	0.890034	247	0.935606
277.724	266	0.914089	252	0.954545
283.757	263	0.90378	248	0.939394
289.81	258	0.886598	242	0.916667
295.863	264	0.907216	250	0.94697
301.928	263	0.90378	241	0.912879
307.976	253	0.869416	239	0.905303
314.019	272	0.934708	251	0.950758
320.063	260	0.893471	244	0.924242
326.099	257	0.883162	237	0.897727
332.146	264	0.907216	243	0.920455
338.183	264	0.907216	239	0.905303
344.214	258	0.886598	239	0.905303
350.242	263	0.90378	240	0.909091
356.27	261	0.896907	246	0.931818
362.295	258	0.886598	242	0.916667
368.321	261	0.896907	244	0.924242
374.352	252	0.865979	239	0.905303
380.382	257	0.883162	240	0.909091
386.41	255	0.876289	234	0.886364
392.441	256	0.879725	245	0.92803
398.473	263	0.90378	246	0.931818
404.508	262	0.900344	237	0.897727
410.538	261	0.896907	236	0.893939
416.568	267	0.917526	239	0.905303
422.601	255	0.876289	243	0.920455
428.633	263	0.90378	248	0.939394
434.662	255	0.876289	247	0.935606
440.694	249	0.85567	237	0.897727
446.732	253	0.869416	241	0.912879
452.763	259	0.890034	230	0.871212
458.794	255	0.876289	242	0.916667
464.834	258	0.886598	233	0.882576
470.871	252	0.865979	245	0.92803
476.913	254	0.872852	238	0.901515
482.951	250	0.859107	239	0.905303
488.999	250	0.859107	234	0.886364
495.045	259	0.890034	230	0.871212
501.092	251	0.862543	236	0.893939
507.138	249	0.85567	235	0.890152
513.179	248	0.852234	234	0.886364
519.215	251	0.862543	235	0.890152
525.24	256	0.879725	231	0.875
531.275	253	0.869416	241	0.912879
537.304	256	0.879725	242	0.916667
543.351	248	0.852234	243	0.920455
549.39	254	0.872852	229	0.867424
555.419	255	0.876289	241	0.912879
561.46	260	0.893471	233	0.882576
567.501	257	0.883162	225	0.852273
573.54	256	0.879725	234	0.886364
579.578	255	0.876289	237	0.897727
585.61	258	0.886598	237	0.897727
591.643	255	0.876289	226	0.856061
597.679	254	0.872852	226	0.856061
603.71	249	0.85567	227	0.859848
609.748	259	0.890034	233	0.882576
615.786	256	0.879725	229	0.867424
621.827	244	0.838488	242	0.916667
627.861	257	0.883162	236	0.893939
633.898	254	0.872852	227	0.859848
639.94	253	0.869416	226	0.856061
645.977	252	0.865979	226	0.856061
652.007	251	0.862543	242	0.916667
658.046	253	0.869416	235	0.890152
664.087	259	0.890034	230	0.871212
670.133	240	0.824742	238	0.901515
676.168	259	0.890034	229	0.867424
682.191	260	0.893471	229	0.867424
688.235	254	0.872852	241	0.912879
694.27	259	0.890034	227	0.859848
700.303	258	0.886598	219	0.829545
706.341	245	0.841924	234	0.886364
712.374	251	0.862543	222	0.840909
718.415	260	0.893471	224	0.848485
724.456	245	0.841924	225	0.852273
730.483	251	0.862543	230	0.871212
736.513	252	0.865979	220	0.833333
742.54	251	0.862543	227	0.859848
748.57	248	0.852234	229	0.867424
754.604	247	0.848797	222	0.840909
760.634	247	0.848797	223	0.844697
766.662	247	0.848797	226	0.856061
772.695	251	0.862543	224	0.848485
778.725	245	0.841924	230	0.871212
784.758	246	0.845361	224	0.848485
790.804	251	0.862543	231	0.875
796.851	241	0.828179	224	0.848485
802.892	258	0.886598	234	0.886364
808.932	248	0.852234	225	0.852273
814.976	241	0.828179	232	0.878788
821.021	245	0.841924	233	0.882576
827.061	247	0.848797	227	0.859848
833.104	244	0.838488	224	0.848485
839.146	248	0.852234	227	0.859848
845.18	249	0.85567	231	0.875
851.211	249	0.85567	228	0.863636
857.247	258	0.886598	237	0.897727
863.284	247	0.848797	223	0.844697
869.314	249	0.85567	221	0.837121
875.35	245	0.841924	221	0.837121
881.385	242	0.831615	230	0.871212
887.414	243	0.835052	233	0.882576
893.441	242	0.831615	221	0.837121
899.484	244	0.838488	217	0.82197
905.515	250	0.859107	219	0.829545
911.564	239	0.821306	221	0.837121
917.614	243	0.835052	230	0.871212
923.648	240	0.824742	230	0.871212
929.684	254	0.872852	224	0.848485
935.739	238	0.817869	229	0.867424
941.772	243	0.835052	225	0.852273
947.817	246	0.845361	223	0.844697
953.856	237	0.814433	219	0.829545
959.902	246	0.845361	229	0.867424
965.94	235	0.80756	229	0.867424
971.972	253	0.869416	226	0.856061
978.005	240	0.824742	224	0.848485
984.038	242	0.831615	228	0.863636
990.07	238	0.817869	216	0.818182
996.104	238	0.817869	222	0.840909
1002.14	246	0.845361	232	0.878788
1008.17	245	0.841924	222	0.840909
1014.2	241	0.828179	223	0.844697
1020.23	245	0.841924	226	0.856061
1026.27	243	0.835052	220	0.833333
1032.3	243	0.835052	219	0.829545
1038.33	243	0.835052	219	0.829545
1044.36	236	0.810997	226	0.856061
1050.39	236	0.810997	226	0.856061
1056.43	241	0.828179	220	0.833333
1062.46	244	0.838488	221	0.837121
1068.5	238	0.817869	223	0.844697
1074.54	243	0.835052	222	0.840909
1080.57	235	0.80756	223	0.844697
1086.61	245	0.841924	219	0.829545
1092.64	247	0.848797	222	0.840909
1098.66	243	0.835052	224	0.848485
1104.69	232	0.797251	223	0.844697
1110.72	241	0.828179	231	0.875
1116.76	232	0.797251	214	0.810606
1122.8	237	0.814433	213	0.806818
1128.84	232	0.797251	232	0.878788
1134.88	234	0.804124	219	0.829545
1140.9	237	0.814433	220	0.833333
1146.94	243	0.835052	216	0.818182
1152.97	239	0.821306	225	0.852273
1159	239	0.821306	219	0.829545
1165.04	239	0.821306	226	0.856061
1171.07	237	0.814433	213	0.806818
1177.1	241	0.828179	225	0.852273
1183.13	236	0.810997	219	0.829545
1189.16	237	0.814433	226	0.856061
1195.2	234	0.804124	228	0.863636
1201.23	241	0.828179	217	0.82197
1207.28	243	0.835052	217	0.82197
1213.33	244	0.838488	232	0.878788
1219.36	237	0.814433	220	0.833333
1225.4	239	0.821306	226	0.856061
1231.43	237	0.814433	219	0.829545
1237.47	235	0.80756	215	0.814394
1243.5	238	0.817869	228	0.863636
1249.54	243	0.835052	214	0.810606
1255.57	236	0.810997	220	0.833333
1261.61	231	0.793814	219	0.829545
1267.64	242	0.831615	214	0.810606
1273.67	231	0.793814	221	0.837121
1279.71	242	0.831615	223	0.844697
1285.76	240	0.824742	217	0.82197
1291.79	235	0.80756	220	0.833333
1297.83	242	0.831615	223	0.844697
1303.87	240	0.824742	211	0.799242
1309.91	239	0.821306	214	0.810606
1315.97	242	0.831615	214	0.810606
1322.02	242	0.831615	216	0.818182
1328.07	234	0.804124	217	0.82197
1334.12	233	0.800687	205	0.776515
1340.17	234	0.804124	223	0.844697
1346.22	245	0.841924	219	0.829545
1352.26	237	0.814433	213	0.806818
1358.29	235	0.80756	225	0.852273
1364.32	241	0.828179	216	0.818182
1370.35	240	0.824742	219	0.829545
1376.38	238	0.817869	220	0.833333
1382.41	234	0.804124	216	0.818182
1388.44	238	0.817869	219	0.829545
1394.47	240	0.824742	220	0.833333
1400.5	239	0.821306	220	0.833333
1406.53	245	0.841924	223	0.844697
1412.56	237	0.814433	224	0.848485
1418.59	233	0.800687	220	0.833333
1424.62	238	0.817869	220	0.833333
1430.66	236	0.810997	230	0.871212
1436.7	241	0.828179	212	0.80303
1442.74	241	0.828179	215	0.814394
1448.78	238	0.817869	216	0.818182
1454.81	234	0.804124	215	0.814394
1460.85	233	0.800687	219	0.829545
1466.88	230	0.790378	225	0.852273
1472.92	233	0.800687	217	0.82197
1478.95	234	0.804124	219	0.829545
1484.98	240	0.824742	218	0.825758
1491.02	236	0.810997	221	0.837121
1497.06	234	0.804124	210	0.795455
1503.09	239	0.821306	217	0.82197
1509.12	230	0.790378	210	0.795455
1515.16	236	0.810997	209	0.791667
1521.21	237	0.814433	221	0.837121
1527.25	242	0.831615	215	0.814394
1533.29	244	0.838488	220	0.833333
1539.33	238	0.817869	217	0.82197
1545.36	238	0.817869	217	0.82197
1551.4	230	0.790378	215	0.814394
1557.45	235	0.80756	207	0.784091
1563.48	244	0.838488	224	0.848485
1569.53	230	0.790378	210	0.795455
1575.57	241	0.828179	213	0.806818
1581.61	245	0.841924	222	0.840909
1587.66	243	0.835052	221	0.837121
1593.7	236	0.810997	214	0.810606
1599.74	252	0.865979	223	0.844697
1605.77	241	0.828179	218	0.825758
1611.81	231	0.793814	221	0.837121
1617.84	238	0.817869	214	0.810606
1623.88	242	0.831615	222	0.840909
1629.91	238	0.817869	218	0.825758
1635.95	230	0.790378	210	0.795455
1641.98	228	0.783505	216	0.818182
1648.02	237	0.814433	212	0.80303
1654.06	233	0.800687	213	0.806818
1660.1	236	0.810997	211	0.799242
1666.14	234	0.804124	217	0.82197
1672.17	240	0.824742	219	0.829545
1678.2	243	0.835052	226	0.856061
1684.23	241	0.828179	215	0.814394
1690.27	236	0.810997	223	0.844697
1696.31	230	0.790378	213	0.806818
1702.35	235	0.80756	213	0.806818
1708.38	233	0.800687	214	0.810606
1714.41	233	0.800687	213	0.806818
1720.45	231	0.793814	219	0.829545
1726.48	231	0.793814	215	0.814394
1732.52	232	0.797251	216	0.818182
1738.55	235	0.80756	222	0.840909
1744.58	239	0.821306	211	0.799242
1750.61	243	0.835052	210	0.795455
1756.64	254	0.872852	210	0.795455
1762.67	236	0.810997	217	0.82197
1768.7	232	0.797251	211	0.799242
1774.74	239	0.821306	211	0.799242
1780.77	237	0.814433	207	0.784091
1786.8	243	0.835052	212	0.80303
1792.82	233	0.800687	212	0.80303
