# Supplementary material for: ARL3 activation requires the co-GEF BART and effector-mediated turnover
Source: eLife. 2021 Jan 13;10:e64624. doi: 10.7554/eLife.64624 (PMC7817177; doi:10.7554/eLife.64624)
Supplement: Figure 2—source data 5. [file elife-64624-fig2-data5.xlsx]

## Sheet: Sheet1
	intrinsic	264	13B	254	13B+Ni-NTA	258
0	250	0.94697	252	0.992126	247	0.957364
7.279	254	0.962121	254	1	244	0.945736
14.568	264	1	251	0.988189	243	0.94186
21.848	252	0.954545	253	0.996063	258	1
29.119	248	0.939394	252	0.992126	242	0.937984
36.403	258	0.977273	241	0.948819	245	0.949612
43.691	250	0.94697	247	0.972441	252	0.976744
50.982	256	0.969697	245	0.964567	242	0.937984
58.272	258	0.977273	232	0.913386	242	0.937984
65.549	258	0.977273	242	0.952756	236	0.914729
72.833	257	0.973485	234	0.92126	238	0.922481
80.106	250	0.94697	234	0.92126	239	0.926357
87.382	250	0.94697	242	0.952756	234	0.906977
94.674	254	0.962121	233	0.917323	240	0.930233
101.959	248	0.939394	233	0.917323	230	0.891473
109.24	262	0.992424	229	0.901575	227	0.879845
116.53	261	0.988636	234	0.92126	242	0.937984
123.811	247	0.935606	231	0.909449	240	0.930233
131.095	250	0.94697	231	0.909449	240	0.930233
138.385	250	0.94697	225	0.885827	242	0.937984
145.673	255	0.965909	223	0.877953	241	0.934109
152.97	252	0.954545	219	0.862205	229	0.887597
160.259	255	0.965909	224	0.88189	232	0.899225
167.533	255	0.965909	219	0.862205	233	0.903101
174.814	253	0.958333	222	0.874016	231	0.895349
182.096	254	0.962121	225	0.885827	232	0.899225
189.38	251	0.950758	229	0.901575	240	0.930233
196.67	257	0.973485	227	0.893701	236	0.914729
203.96	254	0.962121	217	0.854331	231	0.895349
211.232	253	0.958333	220	0.866142	232	0.899225
218.517	252	0.954545	226	0.889764	230	0.891473
225.793	251	0.950758	219	0.862205	228	0.883721
233.067	254	0.962121	215	0.846457	224	0.868217
240.355	256	0.969697	216	0.850394	234	0.906977
247.642	256	0.969697	200	0.787402	219	0.848837
254.927	252	0.954545	219	0.862205	226	0.875969
262.209	257	0.973485	213	0.838583	227	0.879845
269.488	251	0.950758	215	0.846457	228	0.883721
276.77	251	0.950758	201	0.791339	219	0.848837
284.056	255	0.965909	208	0.818898	219	0.848837
291.336	255	0.965909	203	0.799213	230	0.891473
298.625	261	0.988636	206	0.811024	228	0.883721
305.912	247	0.935606	214	0.84252	231	0.895349
313.19	246	0.931818	204	0.80315	231	0.895349
320.469	253	0.958333	201	0.791339	220	0.852713
327.749	263	0.996212	210	0.826772	224	0.868217
335.035	263	0.996212	214	0.84252	219	0.848837
342.318	245	0.92803	209	0.822835	219	0.848837
349.601	256	0.969697	221	0.870079	222	0.860465
356.885	253	0.958333	212	0.834646	215	0.833333
364.152	251	0.950758	203	0.799213	226	0.875969
371.42	258	0.977273	196	0.771654	217	0.841085
378.716	254	0.962121	211	0.830709	225	0.872093
386.014	250	0.94697	196	0.771654	223	0.864341
393.301	251	0.950758	204	0.80315	233	0.903101
400.598	251	0.950758	203	0.799213	217	0.841085
407.866	242	0.916667	206	0.811024	231	0.895349
415.137	252	0.954545	200	0.787402	216	0.837209
422.415	249	0.943182	205	0.807087	221	0.856589
429.695	246	0.931818	205	0.807087	214	0.829457
436.973	255	0.965909	198	0.779528	221	0.856589
444.253	246	0.931818	192	0.755906	223	0.864341
451.523	250	0.94697	199	0.783465	226	0.875969
458.809	251	0.950758	204	0.80315	225	0.872093
466.078	251	0.950758	193	0.759843	227	0.879845
473.356	243	0.920455	194	0.76378	219	0.848837
480.64	251	0.950758	208	0.818898	219	0.848837
487.924	257	0.973485	200	0.787402	226	0.875969
495.2	256	0.969697	199	0.783465	214	0.829457
502.482	249	0.943182	199	0.783465	219	0.848837
509.767	244	0.924242	197	0.775591	220	0.852713
517.049	246	0.931818	198	0.779528	222	0.860465
524.328	247	0.935606	190	0.748031	212	0.821705
531.609	248	0.939394	200	0.787402	224	0.868217
538.895	250	0.94697	199	0.783465	215	0.833333
546.183	238	0.901515	190	0.748031	217	0.841085
553.459	249	0.943182	200	0.787402	213	0.825581
560.744	245	0.92803	194	0.76378	213	0.825581
568.022	248	0.939394	203	0.799213	213	0.825581
575.294	252	0.954545	188	0.740157	214	0.829457
582.578	250	0.94697	191	0.751969	221	0.856589
589.856	253	0.958333	198	0.779528	216	0.837209
597.138	244	0.924242	185	0.728346	214	0.829457
604.426	246	0.931818	192	0.755906	214	0.829457
611.717	241	0.912879	190	0.748031	212	0.821705
619.001	252	0.954545	196	0.771654	218	0.844961
626.303	250	0.94697	191	0.751969	218	0.844961
633.581	242	0.916667	197	0.775591	224	0.868217
640.871	246	0.931818	194	0.76378	213	0.825581
648.155	254	0.962121	187	0.73622	213	0.825581
655.436	237	0.897727	188	0.740157	213	0.825581
662.72	243	0.920455	198	0.779528	205	0.794574
669.996	259	0.981061	188	0.740157	209	0.810078
677.272	252	0.954545	200	0.787402	211	0.817829
684.559	244	0.924242	186	0.732283	204	0.790698
691.842	250	0.94697	202	0.795276	211	0.817829
699.122	245	0.92803	181	0.712598	215	0.833333
706.403	249	0.943182	190	0.748031	205	0.794574
713.681	245	0.92803	199	0.783465	202	0.782946
720.963	244	0.924242	196	0.771654	200	0.775194
728.247	250	0.94697	187	0.73622	207	0.802326
735.515	251	0.950758	191	0.751969	207	0.802326
742.811	250	0.94697	198	0.779528	203	0.786822
750.097	244	0.924242	198	0.779528	196	0.75969
757.374	243	0.920455	187	0.73622	207	0.802326
764.65	248	0.939394	200	0.787402	192	0.744186
771.93	248	0.939394	190	0.748031	205	0.794574
779.213	242	0.916667	198	0.779528	203	0.786822
786.498	239	0.905303	192	0.755906	206	0.79845
793.79	239	0.905303	196	0.771654	204	0.790698
801.078	251	0.950758	190	0.748031	205	0.794574
808.349	240	0.909091	192	0.755906	221	0.856589
815.621	251	0.950758	193	0.759843	199	0.771318
822.901	253	0.958333	194	0.76378	202	0.782946
830.188	241	0.912879	181	0.712598	205	0.794574
837.475	246	0.931818	189	0.744094	211	0.817829
844.773	246	0.931818	189	0.744094	207	0.802326
852.046	236	0.893939	183	0.720472	201	0.77907
859.318	246	0.931818	182	0.716535	197	0.763566
866.604	243	0.920455	203	0.799213	202	0.782946
873.882	253	0.958333	191	0.751969	201	0.77907
881.158	247	0.935606	189	0.744094	207	0.802326
888.45	244	0.924242	189	0.744094	202	0.782946
895.728	246	0.931818	179	0.704724	200	0.775194
903.013	243	0.920455	189	0.744094	201	0.77907
910.295	243	0.920455	185	0.728346	204	0.790698
917.571	247	0.935606	185	0.728346	207	0.802326
924.864	250	0.94697	195	0.767717	193	0.748062
932.125	256	0.969697	191	0.751969	197	0.763566
939.403	247	0.935606	183	0.720472	206	0.79845
946.67	239	0.905303	186	0.732283	196	0.75969
953.946	246	0.931818	190	0.748031	205	0.794574
961.221	235	0.890152	183	0.720472	196	0.75969
968.504	242	0.916667	189	0.744094	206	0.79845
975.787	249	0.943182	194	0.76378	201	0.77907
983.076	251	0.950758	180	0.708661	202	0.782946
990.362	248	0.939394	192	0.755906	186	0.72093
997.641	251	0.950758	184	0.724409	197	0.763566
1004.92	237	0.897727	194	0.76378	196	0.75969
1012.2	247	0.935606	180	0.708661	198	0.767442
1019.49	244	0.924242	181	0.712598	196	0.75969
1026.77	245	0.92803	190	0.748031	201	0.77907
1034.06	245	0.92803	194	0.76378	201	0.77907
1041.34	242	0.916667	180	0.708661	200	0.775194
1048.63	247	0.935606	192	0.755906	202	0.782946
1055.92	243	0.920455	181	0.712598	193	0.748062
1063.21	248	0.939394	196	0.771654	189	0.732558
1070.5	248	0.939394	189	0.744094	197	0.763566
1077.78	244	0.924242	187	0.73622	205	0.794574
1085.07	249	0.943182	187	0.73622	190	0.736434
1092.36	240	0.909091	183	0.720472	198	0.767442
1099.63	252	0.954545	185	0.728346	189	0.732558
1106.91	246	0.931818	191	0.751969	200	0.775194
1114.18	236	0.893939	180	0.708661	196	0.75969
1121.46	241	0.912879	171	0.673228	190	0.736434
1128.74	237	0.897727	182	0.716535	191	0.74031
1136.02	236	0.893939	170	0.669291	193	0.748062
1143.29	247	0.935606	183	0.720472	203	0.786822
1150.58	258	0.977273	177	0.69685	192	0.744186
1157.86	245	0.92803	182	0.716535	204	0.790698
