# Supplementary material for: ARL3 activation requires the co-GEF BART and effector-mediated turnover
Source: eLife. 2021 Jan 13;10:e64624. doi: 10.7554/eLife.64624 (PMC7817177; doi:10.7554/eLife.64624)
Supplement: Figure 3—source data 1. [file elife-64624-fig3-data1.xlsx]

## Sheet: Sheet1
#1
		GST	ARL3	ARL3/GST
	AP	157000	49500	0.315287	0.144621
BART	GDP	224000	7010	0.0312946	0.0143547
	GppNHp	211000	460000	2.18009	1
	AP	433000	5650	0.0130485	0.0163106				AP	GDP	GppNHp	AP	GDP	GppNHp
UNC119A	GDP	589000	6650	0.0112903	0.0141129				0.144621	0.014355	1	0.016311	0.014113	1
	GppNHp	580000	464000	0.8	1				0.128159	0.01966	1	0.016497	0.000952	1
									0.080108	0.007897	1	0.003136	0.004347	1
#2
		GST	ARL3	ARL3/GST
	AP	492000	55700	0.113211	0.128159
BART	GDP	490000	8510	0.0173673	0.0196604
	GppNHp	463000	409000	0.883369	1
	AP	534000	7930	0.0148502	0.0164971
UNC119A	GDP	621000	532	0.000856683	0.000951688
	GppNHp	581000	523000	0.900172	1
#3
		GST	ARL3	ARL3/GST
	AP	185000	55200	0.298378	0.0801076
BART	GDP	188000	5530	0.0294149	0.00789721
	GppNHp	178000	663000	3.72472	1
	AP	550000	1420	0.00258182	0.00313627
UNC119A	GDP	707000	2530	0.0035785	0.004347
	GppNHp	741000	610000	0.823212	1
