# Supplementary material for: ARL3 activation requires the co-GEF BART and effector-mediated turnover
Source: eLife. 2021 Jan 13;10:e64624. doi: 10.7554/eLife.64624 (PMC7817177; doi:10.7554/eLife.64624)
Supplement: Figure 3—source data 2. [file elife-64624-fig3-data2.xlsx]

## Sheet: Sheet1
	150uM GDP			150uM GppNHp			2uM Arl3mD+10uM Arl13B+20uM BART
time	10uM ARL13B		time	10uM Arl13B		time	150uM GDP	150uM GppNHp
0	278		0	252		0	227	212
14.091	268		11.201	256		5.798	228	204
28.182	277		22.404	255		11.599	223	185
42.271	273		33.627	245		17.397	215	172
56.346	261		44.837	254		23.198	204	151
70.428	276		56.037	245		28.997	186	149
84.506	261		67.239	241		34.794	204	141
98.605	267		78.446	239		40.588	194	140
112.68	274		89.66	244		46.381	191	123
126.778	252		100.866	243		52.177	182	117
140.855	263		112.078	236		57.966	181	111
154.942	265		123.277	234		63.754	179	103
169.009	264		134.489	239		69.544	168	110
183.078	267		145.691	231		75.343	170	97
197.162	268		156.896	234		81.147	161	86
211.25	267		168.099	227		86.96	172	86
225.323	263		179.302	221		92.768	160	89
239.392	266		190.505	235		98.57	164	83
253.468	264		201.711	243		104.376	142	75
267.548	250		212.904	226		110.165	138	91
281.63	253		224.115	225		115.957	153	84
295.711	256		235.32	231		121.75	149	81
309.774	249		246.533	225		127.546	152	77
323.858	265		257.733	229		133.339	126	81
337.94	253		268.93	228		139.131	135	78
352.02	260		280.146	223		144.925	121	78
366.087	249		291.35	219		150.718	122	78
380.176	254		302.549	220		156.51	137	71
394.259	254		313.756	215		162.302	127	79
408.34	262		324.961	224		168.102	130	73
422.411	252		336.186	216		173.892	124	67
436.486	251		347.39	209		179.683	134	59
450.568	255		358.587	235		185.48	120	67
464.652	260		369.802	220		191.276	107	72
478.734	260		381.009	226		197.071	109	83
492.809	255		392.211	223		202.867	110	77
506.896	251		403.408	211		208.665	108	65
520.981	245		414.609	210		214.46	117	75
535.054	249		425.817	217		220.254	103	74
549.133	253		437.011	213		226.05	104	69
563.208	241		448.218	217		231.842	108	60
577.294	246		459.414	215		237.646	119	66
591.376	252		470.616	215		243.449	94	71
605.462	249		481.827	219		249.243	108	64
619.535	243		493.025	213		255.036	96	60
633.614	251		504.24	213		260.834	105	67
647.708	252		515.433	219		266.627	111	66
661.792	248		526.634	217		272.423	106	62
675.871	237		537.846	207		278.215	102	63
689.952	249		549.057	197		284.008	93	82
704.032	263		560.254	213		289.804	97	56
718.117	245		571.468	214		295.601	93	68
732.186	249		582.669	200		301.408	89	76
746.257	251		593.873	211		307.219	89	63
760.329	246		605.065	208		313.023	91	72
774.406	247		616.283	219		318.828	86	67
788.496	243		627.482	217		324.636	95	53
802.575	235		638.688	216		330.433	101	72
816.657	247		649.887	212		336.235	94	65
830.734	241		661.084	219		342.029	93	60
844.817	250		672.309	211		347.818	92	53
858.902	242		683.515	213		353.616	95	69
872.977	248		694.714	213		359.409	101	57
887.059	250		705.921	206		365.203	98	49
901.142	240		717.124	203		370.997	82	54
915.224	256		728.332	200		376.797	90	48
929.301	259		739.534	207		382.591	82	56
943.373	244		750.728	210		388.382	91	73
957.456	242		761.946	207		394.177	98	71
971.533	240		773.151	218		399.975	82	57
985.602	244		784.367	200		405.772	79	72
999.685	238		795.566	201		411.572	83	64
1013.77	241		806.757	198		417.368	78	60
1027.86	249		817.966	204		423.159	90	63
1041.95	249		829.164	197		428.949	87	66
1056.02	245		840.363	217		434.738	82	66
1070.09	241		851.556	218		440.533	94	63
1084.18	239		862.753	212		446.329	85	55
1098.28	250		873.958	205		452.122	87	57
1112.36	238		885.166	206		457.914	79	58
1126.55	242		896.365	213		463.711	82	63
1140.62	230		907.568	211		469.506	89	65
1154.71	245		918.772	208		475.304	81	64
1168.78	248		929.976	211		481.1	79	57
1182.86	240		941.172	203		486.898	74	46
1196.93	229		952.388	208		492.697	83	60
1211.02	244		963.581	213		498.497	77	47
1225.12	229		974.773	200		504.297	71	68
1239.21	222		985.982	197		510.095	89	61
1253.29	236		997.181	199		515.894	85	57
1267.37	233		1008.4	195		521.682	86	62
1281.46	241		1019.6	200		527.479	86	67
1295.53	239		1030.81	202		533.285	79	48
1309.61	242		1042.02	203		539.084	79	49
1323.68	236		1053.22	204		544.884	80	60
1337.77	245		1064.42	198		550.686	87	52
1351.86	248		1075.62	201		556.485	89	62
1365.94	235		1086.82	202		562.285	79	67
1380.01	242		1098.02	211		568.074	75	63
1394.1	232		1109.22	192		573.867	82	65
1408.18	247		1120.42	209		579.658	87	53
1422.27	233		1131.62	211		585.456	91	60
1436.35	240		1142.82	195		591.255	72	61
1450.43	247		1154.02	198		597.051	81	58
1464.52	248		1165.23	218		602.842	72	55
1478.61	225		1176.44	201		608.636	82	60
1492.68	239		1187.64	180		614.434	83	60
1506.76	241		1198.83	197		620.229	82	52
1520.83	220		1210.05	199		626.021	78	52
1534.91	232		1221.26	190		631.816	82	53
1549	246		1232.46	205		637.617	87	47
1563.09	228		1243.66	196		643.416	90	57
1577.17	228		1254.86	210		649.22	70	66
1591.25	251		1266.06	208		655.012	76	48
1605.34	238		1277.25	204		660.805	78	46
1619.41	236		1288.45	200		666.601	72	62
1633.49	236		1299.65	201		672.396	89	56
1647.59	244		1310.84	201		678.192	82	60
1661.67	233		1322.04	183		683.987	78	61
1675.77	234		1333.24	200		689.779	79	52
1689.84	230		1344.45	195		695.576	78	60
1703.92	220		1355.66	210		701.37	83	44
1718	228		1366.86	191		707.173	73	49
1732.08	226		1378.07	189		712.968	86	61
1746.16	235		1389.28	203		718.762	87	49
1760.23	239		1400.48	198		724.551	85	57
1774.31	227		1411.69	192		730.345	82	55
1788.38	223		1422.89	206		736.134	73	56
1802.46	214		1434.09	200		741.924	79	67
1816.53	241		1445.3	197		747.713	83	58
1830.61	226		1456.51	194		753.507	87	56
1844.69	228		1467.72	195		759.299	69	58
1858.77	229		1478.91	187		765.098	72	68
1872.86	229		1490.12	192		770.901	87	53
1886.94	237		1501.33	200		776.702	73	52
1901.02	235		1512.54	196		782.506	76	43
1915.11	225		1523.74	202		788.297	81	58
1929.2	223		1534.94	197		794.091	81	55
1943.27	225		1546.15	203		799.884	87	66
1957.34	224		1557.36	198		805.678	75	53
1971.42	227		1568.56	196		811.47	75	60
1985.5	238		1579.75	199		817.257	90	56
1999.59	240		1590.95	195		823.051	85	60
2013.67	231		1602.16	196		828.838	80	60
2027.75	230		1613.37	185		834.63	88	61
2041.83	229		1624.57	199		840.42	74	45
2055.9	234		1635.79	201		846.216	64	47
2069.98	223		1647	201		852.007	63	61
2084.05	221		1658.21	194		857.799	81	57
2098.14	238		1669.42	199		863.593	93	68
2112.23	226		1680.62	196		869.388	67	57
2126.31	231		1691.82	207		875.183	69	64
2140.37	223		1703.02	208		880.981	77	59
2154.44	229		1714.22	193		886.773	82	65
2168.52	219		1725.42	194		892.57	80	58
2182.6	227		1736.62	207		898.37	77	53
2196.67	222		1747.82	192		904.16	72	51
2210.75	232		1759.01	199		909.956	82	47
2224.83	225		1770.21	198		915.746	71	55
2238.92	222		1781.41	198		921.539	69	49
2252.99	226		1792.64	184		927.341	70	48
2267.07	228		1803.85	187		933.144	75	47
2281.16	233		1815.05	195		938.937	67	55
2295.25	215		1826.26	195		944.729	80	63
2309.33	224		1837.47	187		950.529	79	51
2323.41	221		1848.67	194		956.328	76	67
2337.5	230		1859.89	192		962.128	73	43
2351.58	219		1871.08	190		967.919	82	62
2365.67	230		1882.3	173		973.708	65	57
2379.74	232		1893.51	193		979.506	71	62
2393.82	224		1904.71	201		985.311	70	56
2407.9	229		1915.92	205		991.109	77	50
2421.98	218		1927.12	200		996.912	71	60
2436.07	221		1938.32	176		1002.71	79	59
2450.15	232		1949.52	185		1008.51	79	46
2464.23	228		1960.72	187		1014.3	80	50
2478.31	222		1971.93	195		1020.08	65	57
2492.4	227		1983.12	197		1025.87	80	55
2506.47	225		1994.34	189		1031.67	67	65
2520.55	219		2005.54	196		1037.45	71	56
2534.64	217		2016.74	174		1043.25	72	54
2548.73	229		2027.94	194		1049.05	68	46
2562.82	220		2039.14	196		1054.84	63	49
2576.9	232		2050.35	190		1060.64	72	60
2590.98	229		2061.54	184		1066.43	74	57
2605.06	230		2072.74	190		1072.22	75	65
2619.14	217		2083.96	171		1078.02	65	53
2633.21	227		2095.17	201		1083.81	80	50
2647.29	233		2106.37	186		1089.6	73	55
2661.37	227		2117.57	194		1095.4	77	56
2675.46	223		2128.77	195		1101.2	71	53
2689.53	227		2139.98	191		1106.99	81	67
2703.61	224		2151.17	187		1112.78	76	52
2717.7	218		2162.37	189		1118.58	76	43
2731.78	220		2173.57	191		1124.38	75	51
2745.88	223		2184.77	174		1130.16	72	46
2759.96	212		2195.97	189		1135.95	74	52
2774.04	236		2207.17	192		1141.75	80	54
2788.13	216		2218.37	193		1147.55	75	55
2802.21	219		2229.58	193		1153.35	73	52
2816.29	214		2240.78	184		1159.14	77	70
2830.36	221		2251.99	187		1164.93	72	58
2844.44	223		2263.19	181		1170.73	79	54
2858.52	221		2274.39	194		1176.53	75	60
2872.61	216		2285.6	187		1182.32	70	46
2886.68	223		2296.8	198
2900.76	228		2308.01	196
2914.85	221		2319.2	180
2928.94	219		2330.41	194
2943.02	219		2341.62	187
2957.09	220		2352.81	181
2971.18	218		2364.01	199
2985.28	219		2375.2	189
2999.37	219		2386.41	183
3013.45	224		2397.61	180
3027.53	221		2408.8	195
3041.6	216		2420.02	184
3055.68	224		2431.22	186
3069.76	211		2442.43	192
3083.84	225		2453.63	188
3097.93	227		2464.83	190
3112.01	207		2476.03	188
3126.08	218		2487.23	191
3140.16	215		2498.43	177
3154.24	215		2509.63	189
3168.33	222		2520.83	185
3182.42	212		2532.05	198
3196.49	226		2543.24	184
3210.58	222		2554.44	187
3224.66	217		2565.64	185
3238.74	219		2576.85	182
3252.82	210		2588.06	195
3266.9	218		2599.25	200
3280.98	214		2610.45	195
3295.07	209		2621.66	183
3309.15	211		2632.85	182
3323.22	211		2644.05	175
3337.31	215		2655.24	194
3351.39	218		2666.45	187
3365.47	209		2677.67	185
3379.54	211		2688.86	184
3393.63	229		2700.06	183
3407.72	208		2711.25	188
3421.8	218		2722.46	177
3435.88	216		2733.67	194
3449.96	222		2744.87	189
3464.04	219		2756.07	181
3478.12	223		2767.26	191
3492.21	215		2778.47	194
3506.29	216		2789.67	184
3520.37	221		2800.86	189
3534.45	214		2812.07	184
3548.53	209		2823.26	190
3562.61	219		2834.47	180
3576.68	222		2845.67	186
3590.76	214		2856.87	186
3604.85	212		2868.07	184
3618.94	210		2879.27	180
3633.01	215		2890.47	183
3647.08	227		2901.67	181
3661.17	212		2912.87	198
3675.24	212		2924.08	193
3689.32	219		2935.27	180
3703.4	217		2946.47	198
3717.48	207		2957.68	189
3731.57	211		2968.89	180
3745.64	209		2980.09	177
3759.71	217		2991.29	180
3773.79	209		3002.49	179
3787.88	216		3013.7	173
3801.96	208		3024.89	185
3816.04	217		3036.09	193
3830.13	210		3047.28	182
3844.22	218		3058.49	174
3858.31	211		3069.69	181
3872.39	216		3080.89	189
3886.47	212		3092.08	181
3900.55	209		3103.28	185
3914.64	214		3114.49	173
3928.73	210		3125.69	191
3942.8	206		3136.88	187
3956.87	211		3148.08	181
3970.96	202		3159.28	181
3985.04	206		3170.5	183
3999.11	216		3181.71	174
4013.2	213		3192.9	184
4027.28	196		3204.1	183
4041.37	209		3215.29	174
4055.45	210		3226.49	181
4069.53	211		3237.69	189
4083.61	210		3248.88	179
4097.79	211		3260.09	167
4112.26	208		3271.28	174
4126.33	214		3282.48	178
4140.41	195		3293.69	182
4154.5	213		3304.89	177
4168.58	219		3316.09	192
4182.66	222		3327.28	185
4196.74	212		3338.49	177
4210.82	207		3349.7	182
4224.9	209		3360.91	184
4238.99	215		3372.11	183
4253.07	221		3383.3	180
4267.17	215		3394.51	180
4281.25	214		3405.72	182
4295.34	214		3416.93	182
4309.42	208		3428.13	190
4323.49	206		3439.32	190
4337.57	213		3450.53	186
4351.66	207		3461.73	183
4365.74	207		3472.92	191
4379.81	210		3484.12	177
4393.89	210		3495.32	188
4407.98	208		3506.54	177
4422.06	202		3517.74	182
4436.14	216		3528.94	191
4450.22	208		3540.14	184
4464.3	216		3551.34	176
4478.4	200		3562.54	176
4492.48	204		3573.74	184
4506.57	197		3584.93	180
4520.65	203		3596.12	178
4534.73	210		3607.32	187
4548.81	205		3618.55	187
4562.88	212		3629.75	172
4576.96	195		3640.94	178
4591.04	199		3652.15	183
4605.12	201		3663.35	184
4619.21	211		3674.54	177
4633.28	203		3685.75	186
4647.37	202		3696.95	186
4661.46	204		3708.15	178
4675.54	197		3719.35	186
4689.62	210		3730.55	173
4703.71	210		3741.75	179
4717.79	203		3752.95	184
4731.88	215		3764.15	177
4745.95	211		3775.35	181
4760.03	204		3786.56	182
4774.11	195		3797.77	190
4788.21	212		3808.98	176
4802.29	199		3820.18	178
4816.36	193		3831.38	174
4830.44	199		3842.6	180
4844.51	200		3853.8	175
4858.59	202		3865	177
4872.68	202		3876.2	175
4886.76	205		3887.39	177
4900.85	212		3898.6	178
4914.94	200		3909.8	173
4929.02	202		3921	167
4943.11	203		3932.2	175
4957.19	214		3943.4	171
4971.27	205		3954.62	181
4985.35	195		3965.83	184
4999.43	201		3977.02	183
5013.51	203		3988.22	177
5027.59	192		3999.43	178
5041.68	211		4010.63	183
5055.76	202		4021.82	180
5069.83	205		4033.04	161
5083.91	201		4044.25	180
5098	198		4055.45	173
5112.09	198		4066.65	175
5126.16	191		4077.85	179
5140.24	202		4089.05	175
5154.34	199		4100.25	176
5168.42	191		4111.44	186
5182.5	205		4122.66	179
5196.57	184		4133.87	170
5210.66	203		4145.06	173
5224.75	205		4156.26	180
5238.83	208		4167.46	175
5252.91	205		4178.66	170
5266.99	205		4189.86	172
5281.07	203		4201.07	175
5295.14	196		4212.27	178
5309.22	188		4223.46	181
5323.31	205		4234.67	190
5337.4	201		4245.88	171
5351.5	193		4257.07	181
5365.58	208		4268.28	169
5379.66	198		4279.48	175
5393.73	202		4290.69	179
5407.8	194		4301.89	171
5421.88	201		4313.08	179
5435.98	206		4324.29	173
5450.06	208		4335.48	168
5464.14	198		4346.68	191
5478.22	197		4357.88	177
5492.29	190		4369.09	177
5506.37	191		4380.29	167
5520.45	190		4391.48	168
5534.53	193		4402.68	173
5548.62	193		4413.89	178
5562.72	192		4425.09	172
5576.8	187		4436.29	170
5590.88	209		4447.48	171
5604.96	196		4458.69	170
5619.03	193		4469.9	179
5633.1	195		4481.1	174
5647.19	192		4492.31	177
5661.27	203		4503.5	184
5675.36	183		4514.71	179
5689.43	193		4525.92	180
5703.53	192		4537.11	179
5717.62	185		4548.31	169
5731.69	187		4559.51	173
5745.77	195		4570.71	173
5759.87	189		4581.91	169
5773.96	194		4593.11	174
5788.05	204		4604.32	172
5802.12	197		4615.51	180
5816.2	191		4626.72	176
5830.27	189		4637.92	172
5844.36	185		4649.12	176
5858.45	189		4660.32	166
5872.52	194		4671.52	175
5886.58	195		4682.73	172
5900.67	191		4693.94	167
5914.75	198		4705.14	181
5928.82	191		4716.35	176
5942.91	191		4727.54	178
5956.99	191		4738.74	164
5971.07	190		4749.94	168
5985.15	182		4761.14	177
5999.23	198		4772.35	175
6013.31	189		4783.55	173
6027.4	196		4794.75	173
6041.48	198		4805.95	172
6055.56	194		4817.14	176
6069.64	186		4828.35	175
6083.72	184		4839.54	165
6097.81	192		4850.74	178
6111.88	186		4861.94	177
6125.95	185		4873.13	170
6140.03	192		4884.33	173
6154.12	187		4895.52	164
6168.19	197		4906.73	166
6182.27	179		4917.94	178
6196.36	182		4929.15	170
6210.45	188		4940.36	173
6224.53	198		4951.55	174
6238.61	177		4962.75	181
6252.69	185		4973.95	174
6266.77	188		4985.14	167
6280.85	186		4996.34	171
6294.93	190		5007.54	181
6309.01	182		5018.74	162
6323.09	190		5029.94	175
6337.17	189		5041.14	175
6351.25	176		5052.35	174
6365.33	190		5063.55	172
6379.41	184		5074.75	163
6393.5	186		5085.94	174
6407.59	186		5097.14	175
6421.67	179		5108.35	162
6435.75	178		5119.56	173
6449.84	186		5130.76	171
6463.92	190		5141.96	179
6478	186		5153.17	169
6492.08	176		5164.38	175
6506.16	169		5175.57	167
6520.24	191		5186.77	175
6534.32	182		5197.98	177
6548.4	180		5209.17	172
6562.48	190		5220.38	172
6576.57	189		5231.57	164
6590.65	182		5242.77	182
6604.74	176		5253.98	175
6618.82	188		5265.17	163
6632.9	171		5276.38	171
6646.98	176		5287.58	178
6661.06	182		5298.78	170
6675.14	172		5309.99	177
6689.22	168		5321.19	172
6703.3	174		5332.38	165
6717.39	179		5343.59	169
6731.47	177		5354.81	168
6745.54	182		5366.01	166
6759.62	174		5377.21	183
6773.71	172		5388.42	174
6787.79	174		5399.61	173
6801.86	180		5410.8	169
6815.94	176		5422	169
6830.02	178		5433.2	174
6844.12	170		5444.41	159
6858.2	175		5455.6	175
6872.27	165		5466.8	174
6886.35	178		5478	169
6900.44	179		5489.19	163
6914.52	181		5500.4	159
6928.59	176		5511.61	168
6942.67	173		5522.81	164
6956.76	171		5534.01	166
6970.84	179		5545.21	165
6984.92	174		5556.42	176
6998.99	174		5567.62	165
7013.08	163		5578.81	166
7027.17	184		5590.01	163
7041.26	171		5601.21	177
7055.34	176		5612.42	171
7069.43	185		5623.61	178
7083.51	176		5634.81	166
7097.6	175		5646.02	179
7111.67	179		5657.21	160
7125.75	176		5668.41	165
7139.83	158		5679.61	168
7153.91	171		5690.82	172
7167.99	176		5702.02	157
7182.07	167		5713.21	156
7196.14	164		5724.41	167
7210.22	166		5735.61	170
7224.28	163		5746.81	163
7238.35	180		5758.01	163
7252.43	161		5769.2	162
7266.51	170		5780.43	175
7280.6	168		5791.62	165
7294.68	168		5802.83	166
7308.76	182		5814.03	164
7322.84	168		5825.23	166
7336.92	165		5836.43	174
7350.98	169		5847.64	165
7365.06	162		5858.84	159
7379.14	163		5870.04	157
7393.23	160		5881.24	160
7407.32	158		5892.44	168
7421.39	170		5903.64	172
7435.47	160		5914.84	173
7449.53	167		5926.04	163
7463.62	179		5937.24	170
7477.71	174		5948.44	163
7491.79	167		5959.63	167
7505.88	169		5970.83	164
7519.96	172		5982.05	162
7534.03	155		5993.25	159
7548.1	174		6004.46	161
7562.19	183		6015.66	160
7576.27	161		6026.87	166
7590.35	163		6038.07	156
7604.44	165		6049.27	164
7618.51	174		6060.47	178
7632.59	176		6071.66	181
7646.68	166		6082.86	175
7660.75	171		6094.06	162
7674.82	175		6105.25	178
7688.91	167		6116.45	158
7703	160		6127.65	165
7717.1	160		6138.85	158
7731.16	155		6150.05	154
7745.24	165		6161.25	167
7759.32	163		6172.45	156
7773.4	165		6183.66	181
7787.49	172		6194.87	159
7801.57	170		6206.07	165
7815.64	160		6217.28	163
7829.84	154		6228.49	156
7844.32	160		6239.69	170
7858.39	178		6250.89	162
7872.47	164		6262.09	176
7886.54	163		6273.28	162
7900.63	160		6284.48	159
7914.73	164		6295.67	168
7928.81	158		6306.88	152
7942.89	162		6318.07	161
7956.98	158		6329.27	164
7971.06	164		6340.47	165
7985.14	152		6351.66	160
7999.22	163		6362.88	164
8013.3	157		6374.08	154
8027.39	156		6385.27	158
8041.46	166		6396.47	159
8055.55	169		6407.68	166
8069.63	155		6418.9	163
8083.72	165		6430.11	155
8097.8	171		6441.3	159
8111.88	157		6452.5	160
8125.97	148		6463.7	159
8140.05	163		6474.9	160
8154.14	160		6486.1	169
8168.21	152		6497.29	160
8182.28	146		6508.5	165
8196.37	151		6519.69	157
8210.45	156		6530.9	164
8224.53	164		6542.09	181
8238.6	161		6553.29	169
8252.68	154		6564.5	164
8266.77	154		6575.7	168
8280.86	157		6586.9	156
8294.94	148		6598.1	152
8309.01	155		6609.3	158
8323.09	161		6620.51	170
8337.18	152		6631.7	161
8351.26	159		6642.91	171
8365.34	150		6654.11	156
8379.42	145		6665.31	163
8393.5	157		6676.51	164
8407.57	158		6687.7	164
8421.65	159		6698.91	167
8435.74	166		6710.11	163
8449.82	154		6721.31	160
8463.92	150		6732.51	174
8477.99	155		6743.7	156
8492.07	142		6754.91	161
8506.15	162		6766.11	161
8520.24	158		6777.31	168
8534.31	167		6788.51	156
8548.39	152		6799.71	162
8562.48	160		6810.91	165
8576.57	145		6822.11	158
8590.66	154		6833.3	160
8604.73	166		6844.52	144
8618.81	150		6855.72	157
8632.9	146		6866.92	153
8646.98	167		6878.12	163
8661.06	163		6889.31	149
8675.14	151		6900.52	165
8689.22	148		6911.72	156
8703.3	149		6922.93	154
8717.38	159		6934.13	143
8731.45	158		6945.32	149
8745.53	157		6956.53	155
8759.61	152		6967.72	161
8773.7	157		6978.93	158
8787.79	146		6990.14	146
8801.87	135		7001.33	172
8815.96	151		7012.53	156
8830.04	159		7023.73	158
8844.11	144		7034.94	164
8858.19	150		7046.15	155
8872.27	147		7057.34	157
8886.35	144		7068.55	155
8900.43	148		7079.76	172
8914.51	159		7090.97	171
8928.58	149		7102.17	161
8942.67	147		7113.37	166
8956.75	152		7124.58	159
8970.83	150		7135.77	169
8984.92	149		7146.98	163
8999	160		7158.17	156
9013.1	145		7169.36	166
9027.17	152		7180.57	172
9041.24	142		7191.76	170
9055.3	146		7202.96	175
9069.37	159		7214.15	166
9083.45	143		7225.34	160
9097.53	145		7236.54	168
9111.61	146		7247.74	153
9125.69	151		7258.93	171
9139.77	132		7270.14	164
9153.87	131		7281.34	155
9167.94	141		7292.55	157
9182.03	160		7303.75	152
9196.12	143		7314.95	158
9210.22	151		7326.15	161
9224.3	143		7337.35	149
9238.38	149		7348.55	163
9252.46	146		7359.74	168
9266.55	142		7370.95	147
9280.63	135		7382.15	167
9294.7	154		7393.34	153
9308.78	146		7404.54	154
9322.86	152		7415.74	163
9336.95	146		7426.96	155
9351.02	152		7438.16	154
9365.1	151		7449.35	157
9379.19	137		7460.55	171
9393.26	143		7471.74	173
9407.36	144		7482.94	153
9421.43	154		7494.15	156
9435.51	145		7505.34	170
9449.6	145		7516.55	155
9463.67	137		7527.74	172
9477.75	140		7538.95	151
9491.82	145		7550.15	147
9505.92	136		7561.35	150
9520	137		7572.56	147
9534.08	140		7583.76	150
9548.15	144		7594.96	153
9562.24	146		7606.16	161
9576.32	147		7617.37	157
9590.4	135		7628.57	159
9604.47	156		7639.77	156
9618.56	141		7650.98	155
9632.65	150		7662.18	164
9646.73	149		7673.38	170
9660.8	139		7684.58	167
9674.87	153		7695.76	161
9688.95	142		7706.98	153
9703.04	146		7718.19	154
9717.12	146		7729.39	154
9731.19	147		7740.59	140
9745.27	152		7751.79	176
9759.36	146		7763	154
9773.44	145		7774.21	140
9787.51	135		7785.4	163
9801.59	132		7796.6	145
9815.68	136		7807.79	144
9829.77	140		7819	155
9843.86	154		7830.2	150
9857.94	135		7841.4	164
9872.02	140		7852.6	139
9886.1	131		7863.79	159
9900.17	135		7875.01	150
9914.25	140		7886.21	144
9928.33	146		7897.4	166
9942.41	145		7908.61	155
9956.49	126		7919.81	156
9970.58	142		7931.02	153
9984.65	144		7942.22	146
9998.74	140		7953.42	147
10012.8	140		7964.62	155
10026.9	137		7975.82	150
10041	138		7987.02	154
10055.1	141		7998.22	165
10069.1	130		8009.41	145
10083.2	132		8020.61	150
10097.3	135		8031.8	155
10111.4	140		8043.01	149
10125.5	128		8054.22	153
10139.5	137		8065.41	156
10153.6	135		8076.61	155
10167.7	138		8087.81	154
10181.8	133		8099.02	147
10195.9	139		8110.23	147
10210	130		8121.42	140
10224	141		8132.61	155
10238.1	131		8143.81	153
10252.2	142		8155.03	162
10266.3	128		8166.23	151
10280.4	131		8177.42	153
10294.4	138		8188.62	158
10308.5	141		8199.82	157
10322.6	132		8211.02	157
10336.7	127		8222.22	155
10350.8	142		8233.41	148
10364.8	139		8244.63	153
10378.9	125		8255.82	150
10393	130		8267.03	157
10407.1	134		8278.23	158
10421.2	127		8289.42	161
10435.3	133		8300.63	155
10449.4	133		8311.82	148
10463.5	132		8323.02	151
10477.5	141		8334.23	154
10491.6	139		8345.43	151
10505.7	131		8356.64	144
10519.8	131		8367.83	148
10533.9	132		8379.05	147
10548	136		8390.25	149
10562	128		8401.45	152
10576.1	134		8412.66	155
10590.2	143		8423.86	152
10604.3	127		8435.06	153
10618.3	131		8446.26	153
10632.4	147		8457.46	154
10646.5	135		8468.66	144
10660.6	139		8479.85	155
10674.7	134		8491.06	145
10688.7	122		8502.27	144
10702.8	126		8513.46	153
10716.9	139		8524.66	150
10731	123		8535.85	163
10745.1	124		8547.06	148
10759.1	130		8558.25	156
10773.2	132		8569.45	145
10787.3	131		8580.67	145
10801.4	126		8591.87	151
10815.5	132		8603.07	151
10829.6	127		8614.27	153
10843.6	134		8625.47	150
10857.7	132		8636.67	154
10871.8	137		8647.86	151
10885.8	151		8659.06	151
10899.9	139		8670.27	152
10914	120		8681.47	146
10928.1	134		8692.66	148
10942.2	138		8703.85	152
10956.3	124		8715.07	152
10970.3	130		8726.27	148
10984.4	137		8737.47	150
10998.5	134		8748.68	145
11012.6	128		8759.87	153
11026.7	125		8771.08	150
11040.7	137		8782.29	153
11054.8	134		8793.49	150
11068.9	130		8804.7	145
11083	132		8815.89	144
11097.1	117		8827.09	152
11111.1	133		8838.3	155
11125.2	132		8849.49	156
11139.3	134		8860.69	154
11153.4	118		8871.89	154
11167.5	126		8883.09	154
11181.5	126		8894.29	141
11195.6	116		8905.49	146
11209.7	127		8916.7	145
11223.8	113		8927.89	153
11237.9	127		8939.1	153
11252	125		8950.3	144
11266	132		8961.5	141
11280.1	126		8972.7	143
11294.2	114		8983.89	143
11308.3	133		8995.1	148
11322.4	127		9006.31	142
11336.5	126		9017.53	152
11350.5	125		9028.73	155
11364.6	122		9039.96	157
11378.7	122		9051.15	156
11392.8	125		9062.34	138
11406.9	116		9073.53	143
11420.9	139		9084.73	145
11435	128		9095.92	164
11449.1	121		9107.13	156
11463.2	140		9118.34	157
11477.3	128		9129.53	153
11491.3	126		9140.73	161
11505.4	114		9151.93	144
11519.5	116		9163.13	146
11533.6	121		9174.32	154
11547.7	125		9185.52	156
11561.8	121		9196.73	150
11575.8	119		9207.93	146
11589.9	127		9219.14	162
11604	131		9230.34	152
11618.1	122		9241.54	136
11632.2	119		9252.75	153
11646.3	109		9263.93	148
11660.3	113		9275.13	150
11674.4	134		9286.33	152
11688.5	136		9297.53	145
11702.6	128		9308.73	146
11716.6	130		9319.92	143
11730.7	126		9331.13	151
11744.8	128		9342.33	145
11758.9	116		9353.52	142
11773	123		9364.73	137
11787.1	128		9375.93	153
11801.1	130		9387.13	149
11815.2	123		9398.33	153
11829.3	113		9409.52	149
11843.4	122		9420.71	163
11857.5	123		9431.91	149
11871.5	122		9443.13	141
11885.6	119		9454.33	144
11899.7	117		9465.53	146
11913.8	136		9476.73	151
11927.9	120		9487.93	149
11942	123		9499.14	146
11956	116		9510.33	150
11970.1	126		9521.52	150
11984.2	111		9532.73	144
11998.3	118		9543.92	151
12012.4	113		9555.12	135
12026.5	128		9566.32	153
12040.5	110		9577.51	144
12054.6	119		9588.72	144
12068.7	131		9599.91	150
12082.8	124		9611.11	149
12096.8	117		9622.31	158
12110.9	119		9633.51	157
12125	116		9644.72	144
12139.1	127		9655.91	145
12153.2	126		9667.12	156
12167.3	118		9678.32	143
12181.3	113		9689.52	148
12195.4	125		9700.73	145
12209.5	127		9711.93	146
12223.6	122		9723.13	144
12237.7	123		9734.33	150
12251.8	126		9745.52	136
12265.8	128		9756.73	148
12279.9	111		9767.92	140
12294	121		9779.13	158
12308.1	123		9790.33	138
12322.2	112		9801.52	145
12336.3	121		9812.72	146
12350.3	118		9823.92	157
12364.4	118		9835.13	153
12378.5	116		9846.32	149
12392.6	121		9857.52	133
12406.7	116		9868.73	153
12420.7	127		9879.94	149
12434.8	123		9891.14	154
12448.9	129		9902.33	150
12463	111		9913.52	154
12477.1	112		9924.74	150
12491.2	129		9935.93	140
12505.2	105		9947.13	159
12519.3	119		9958.33	156
12533.4	117		9969.52	144
12547.5	116		9980.73	146
12561.5	129		9991.92	150
12575.6	126		10003.1	149
12589.7	118		10014.3	153
12603.8	110		10025.5	165
12617.9	109		10036.7	143
12632	117		10047.9	143
12646	122		10059.1	136
12660.1	116		10070.3	141
12674.2	120		10081.5	149
12688.3	106		10092.8	144
12702.4	133		10104	143
12716.4	106		10115.2	146
12730.5	134		10126.4	147
12744.6	113		10137.6	148
12758.6	125		10148.7	153
12772.7	131		10159.9	150
12786.8	115		10171.1	154
12800.9	120		10182.3	148
12815	109		10193.5	150
12829	117		10204.7	146
12843.1	129		10215.9	149
12857.2	116		10227.1	146
12871.3	111		10238.3	145
12885.4	112		10249.5	150
12899.5	120		10260.7	153
12913.5	127		10271.9	150
12927.6	126		10283.1	160
12941.7	119		10294.4	148
12955.8	111		10305.6	160
12969.9	125		10316.8	146
12983.9	105		10328	153
12998	116		10339.2	145
13012.1	116		10350.4	145
13026.2	115		10361.6	148
13040.3	122		10372.8	152
13054.3	116		10384	148
13068.4	109		10395.2	138
13082.5	111		10406.4	144
13096.6	105		10417.6	160
13110.7	123		10428.8	153
13124.8	120		10440	151
13138.8	106		10451.2	148
13152.9	130		10462.4	146
13167	116		10473.6	141
13181.1	106		10484.8	159
13195.2	120		10496	159
13209.2	114		10507.2	139
13223.3	116		10518.4	138
13237.4	119		10529.6	156
13251.5	121		10540.8	145
13265.6	113		10552	144
13279.6	123		10563.2	155
13293.7	108		10574.4	153
13307.8	119		10585.6	148
13321.9	104		10596.8	155
13336	117		10608	150
13350	115		10619.2	148
13364.1	107		10630.4	155
13378.2	105		10641.6	138
13392.3	112		10652.8	143
13406.4	126		10664	152
13420.4	105		10675.2	152
13434.5	104		10686.4	144
13448.6	119		10697.6	166
13462.7	121		10708.8	151
13476.8	117		10720	152
13490.9	113		10731.2	147
13505	102		10742.4	153
13519	106		10753.6	145
13533.1	112		10764.8	145
13547.2	120		10776	138
13561.3	104		10787.2	153
13575.3	116		10798.4	144
13589.4	111		10809.6	140
13603.5	112		10820.8	152
13617.6	113		10832	143
13631.7	104		10843.2	147
13645.7	104		10854.4	150
13659.8	104		10865.6	142
13673.9	112		10876.8	154
13688	108		10888	143
13702.1	99		10899.2	143
13716.2	114		10910.4	147
13730.3	118		10921.6	161
13744.3	114		10932.9	139
13758.4	116		10944.1	143
13772.5	114		10955.3	149
13786.6	121		10966.5	144
13800.7	117		10977.7	144
13814.7	108		10988.9	143
13828.8	105		11000.1	145
13842.9	96		11011.3	145
13857	97		11022.5	165
13871.1	119		11033.7	154
13885.1	124		11044.9	144
13899.2	97		11056.1	143
13913.3	110		11067.3	148
13927.4	108		11078.5	155
13941.5	106		11089.7	147
13955.6	102		11100.9	149
13969.6	97		11112.1	165
13983.7	108		11123.3	153
13997.8	107		11134.5	152
14011.9	112		11145.7	159
14026	114		11156.9	152
14040	114		11168.1	152
14054.1	117		11179.3	159
14068.2	99		11190.5	152
14082.3	118		11201.7	157
14096.4	101		11212.9	144
14110.5	112		11224.1	158
14124.5	109		11235.3	146
14138.6	118		11246.5	152
14152.7	113		11257.7	163
14166.8	107		11268.9	152
14180.9	115		11280.1	159
14195	105		11291.3	162
14209	92		11302.5	147
14223.1	104		11313.7	151
14237.2	103		11324.9	150
14251.3	102		11336.1	140
14265.4	102		11347.3	151
14279.4	97		11358.5	141
14293.5	103		11369.7	149
14307.6	105		11380.9	144
14321.7	108		11392.1	160
14335.8	112		11403.3	148
14349.8	113		11414.5	149
14363.9	111		11425.7	145
14378	109		11436.9	158
14392.1	115		11448.1	146
14406.2	102		11459.3	158
14420.3	113		11470.5	149
14434.3	132		11481.7	143
14448.4	102		11493	155
14462.5	105		11504.1	152
14476.6	112		11515.3	147
14490.7	96		11526.5	161
14504.8	103		11537.7	163
14518.9	105		11548.9	135
14532.9	103		11560.1	158
14547	99		11571.3	142
14561.1	110		11582.6	145
14575.2	102		11593.8	140
14589.2	109		11605	152
14603.3	110		11616.2	139
14617.3	95		11627.4	150
14631.4	107		11638.6	153
14645.5	105		11649.8	147
14659.6	97		11661	153
14673.7	87		11672.2	144
14687.7	109		11683.4	146
14701.8	104		11694.6	145
14715.9	121		11705.8	153
14730	107		11717	149
14744.1	111		11728.1	158
14758.2	107		11739.4	143
14772.2	104		11750.6	142
14786.3	104		11761.8	154
14800.4	117		11773	151
14814.5	107		11784.2	145
14828.6	100		11795.4	145
14842.7	108		11806.6	147
14856.7	106		11817.8	153
14870.8	107		11829	142
14884.9	103		11840.2	152
14899	108		11851.4	147
14913.1	101		11862.6	152
14927.1	99		11873.8	152
14941.2	113		11885	151
14955.3	108		11896.2	157
14969.4	100		11907.4	157
14983.5	106		11918.6	152
14997.5	106		11929.8	151
15011.6	103		11941	159
15025.7	108		11952.2	141
15039.8	115		11963.4	146
15053.9	94		11974.6	145
15068	101		11985.8	144
15082.5	105		11997	140
15096.6	104		12008.2	153
15110.7	103		12019.4	150
15124.8	105		12030.6	161
15138.8	109		12041.8	162
15152.9	97		12053	137
15167	87		12064.2	143
15181.1	109		12075.4	146
15195.2	107		12086.6	140
15209.3	104		12097.8	145
15223.3	101		12109	146
15237.4	106		12120.2	152
15251.5	111		12131.4	148
15265.6	92		12142.6	147
15279.7	103		12153.8	149
15293.7	105		12165	158
15307.8	97		12176.2	163
15321.9	95		12187.4	145
15336	103		12198.6	142
15350.1	110		12209.8	145
15364.1	100		12221	150
15378.2	117		12232.2	155
15392.3	96		12243.4	157
15406.4	97		12254.6	149
15420.5	113		12265.8	138
15434.6	99		12277	148
15448.6	99		12288.2	139
15462.7	83		12299.4	149
15476.8	102		12310.6	151
15490.9	105		12321.8	144
15505	102		12333	153
15519.1	90		12344.2	142
15533.1	98		12355.4	144
15547.2	101		12366.6	145
15561.3	101		12377.8	153
15575.4	93		12389.1	145
15589.4	101		12400.3	141
15603.5	104		12411.5	142
15617.6	83		12422.7	159
15631.7	103		12433.9	154
15645.8	114		12445.1	144
15659.8	99		12456.3	148
15673.9	102		12467.5	156
15688	104		12478.7	152
15702.1	94		12489.9	149
15716.2	105		12501.1	145
15730.3	100		12512.3	156
15744.3	94		12523.5	152
15758.4	100		12534.7	145
15772.5	109		12545.9	157
15786.6	110		12557.1	151
15800.7	94		12568.3	149
15814.7	94		12579.5	148
15828.8	98		12590.7	147
15842.9	89		12601.9	154
15857	106		12613.1	153
15871.1	96		12624.3	146
15885.1	109		12635.5	140
15899.2	97		12646.7	145
15913.3	100		12657.9	140
15927.4	111		12669.1	164
15941.5	103		12680.3	147
15955.6	99		12691.5	139
15969.6	84		12702.7	144
15983.7	82		12713.9	140
15997.8	99		12725.1	150
16011.9	87		12736.3	146
16026	91		12747.5	152
16040	93		12758.7	156
16054.1	91		12769.9	142
16068.2	100		12781.1	143
16082.3	112		12792.3	152
16096.4	101		12803.5	152
16110.5	113		12814.7	146
16124.5	94		12825.9	149
16138.6	100		12837.1	148
16152.7	87		12848.3	165
16166.8	91		12859.5	152
16180.9	95		12870.8	154
16194.9	98		12882	148
16209	103		12893.2	143
16223.1	109		12904.4	147
16237.2	97		12915.6	156
16251.3	91		12926.8	144
16265.3	102		12938	147
16279.4	111		12949.2	147
16293.5	93		12960.4	151
16307.6	99		12971.6	150
16321.7	101		12982.8	150
16335.8	89		12994	146
16349.8	98		13005.2	148
16363.9	96		13016.4	143
16378	85		13027.6	151
16392.1	98		13038.8	147
16406.1	106		13050	157
16420.2	104		13061.2	158
16434.3	96		13072.4	155
16448.4	102		13083.6	144
16462.5	99		13094.8	144
16476.5	89		13106	152
16490.6	95		13117.2	151
16504.7	83		13128.4	161
16518.7	97		13139.6	144
16532.8	108		13150.8	146
16546.9	100		13162	148
16560.9	89		13173.2	157
16575	103		13184.4	142
16589.1	90		13195.6	158
16603.2	98		13206.9	156
16617.3	100		13218.1	148
16631.3	100		13229.3	143
16645.4	103		13240.4	144
16659.5	105		13251.7	147
16673.6	89		13262.9	155
16687.7	97		13274.1	135
16701.8	97		13285.3	160
16715.9	103		13296.5	147
16729.9	90		13307.7	161
16744	105		13318.9	144
16758.1	109		13330.1	156
16772.2	113		13341.3	148
16786.3	103		13352.5	149
16800.3	95		13363.7	154
16814.4	90		13374.9	149
16828.5	104		13386.1	161
16842.6	90		13397.3	150
16856.7	104		13408.5	152
16870.8	104		13419.7	156
16884.8	85		13430.9	149
16898.9	86		13442.1	149
16913	94		13453.3	150
16927.1	87		13464.5	153
16941.2	98		13475.7	154
16955.2	76		13486.9	151
16969.3	79		13498.1	144
16983.4	111		13509.4	142
16997.5	96		13520.6	145
17011.6	93		13531.8	153
17025.7	82		13543	143
17039.7	94		13554.2	146
17053.8	96		13565.4	144
17067.9	93		13576.6	141
17082	81		13587.8	150
17096.1	99		13599	143
17110.1	90		13610.2	156
17124.2	95		13621.4	151
17138.3	89		13632.6	142
17152.4	95		13643.8	148
17166.5	86		13655	150
17180.5	101		13666.2	145
17194.6	91		13677.4	147
17208.7	97		13688.6	148
17222.8	84		13699.8	130
17236.9	84		13711	151
17250.9	83		13722.2	164
17265	98		13733.4	157
17279.1	77		13744.6	151
17293.2	88		13755.8	151
17307.3	103		13767	145
17321.4	89		13778.2	154
17335.4	102		13789.4	150
17349.5	90		13800.6	156
17363.6	88		13811.8	154
17377.7	88		13823	151
17391.8	91		13834.2	148
17405.8	107		13845.4	148
17419.9	87		13856.6	159
17434	100		13867.8	147
17448.1	84		13879	155
17462.2	103		13890.3	158
17476.2	95		13901.5	138
17490.3	95		13912.7	148
17504.4	89		13923.9	145
17518.5	101		13935.1	136
17532.6	86		13946.3	153
17546.7	96		13957.5	150
17560.8	83		13968.7	146
17574.8	96		13979.9	138
17588.9	87		13991.1	146
17603	87		14002.3	153
17617.1	87		14013.5	134
17631.2	91		14024.7	140
17645.3	88		14035.9	139
17659.3	97		14047.1	152
17673.4	83		14058.3	149
17687.5	88		14069.5	149
17701.6	84		14080.7	155
17715.6	105		14091.9	149
17729.7	101		14103.1	146
17743.8	86		14114.3	143
17757.9	87		14125.5	153
17772	100		14136.7	149
17786	95		14147.9	152
17800.1	96		14159.1	139
17814.2	80		14170.3	158
17828.3	97		14181.5	148
17842.4	98		14192.7	166
17856.4	89		14203.9	147
17870.5	86		14215.1	159
17884.6	90		14226.3	160
17898.7	108		14237.5	151
17912.8	89		14248.7	155
17926.8	89		14259.9	150
17940.9	88		14271.1	152
17955	93		14282.3	149
17969.1	83		14293.5	162
17983.2	82		14304.7	138
17997.3	99		14315.9	150
18011.3	91		14327.1	149
18025.4	93		14338.3	157
18039.5	95		14349.5	151
18053.6	104		14360.7	155
18067.7	91		14371.9	151
18081.8	79		14383.1	148
18095.8	94		14394.3	151
18109.9	100		14405.6	151
18124	82		14416.8	154
18138.1	89		14428	155
18152.2	94		14439.2	154
18166.2	84		14450.4	155
18180.3	85		14461.6	140
18194.4	95		14472.8	155
18208.5	89		14484	142
18222.6	82		14495.2	146
18236.6	96		14506.4	147
18250.7	91		14517.6	146
18264.8	91		14528.8	147
18278.9	92		14540	146
18293	77		14551.2	142
18307	97		14562.4	149
18321.1	91		14573.5	146
18335.2	87		14584.7	158
18349.3	86		14596	151
18363.3	79		14607.2	151
18377.4	91		14618.4	148
18391.4	87		14629.6	142
18405.5	91		14640.8	156
18419.6	85		14652	148
18433.6	96		14663.1	145
18447.7	79		14674.3	148
18461.8	98		14685.5	146
18475.9	81		14696.7	154
18489.9	92		14707.9	155
18504	85		14719.1	137
18518.1	92		14730.3	137
18532.2	82		14741.5	150
18546.3	82		14752.7	136
18560.4	77		14763.9	144
18574.4	92		14775.1	157
18588.5	89		14786.3	146
18602.6	91		14797.5	156
18616.7	81		14808.7	140
18630.8	90		14819.9	141
18644.9	86		14831.1	156
18658.9	92		14842.3	131
18673	87		14853.5	156
18687.1	72		14864.7	157
18701.2	87		14875.9	144
18715.3	83		14887.1	144
18729.3	99		14898.3	147
18743.4	85		14909.5	161
18757.5	79		14920.7	151
18771.6	97		14931.9	150
18785.7	83		14943.1	154
18799.7	91		14954.3	145
18813.8	84		14965.5	146
18827.9	84		14976.7	141
18842	98		14987.9	158
18856.1	98		14999.1	150
18870.2	96		15010.3	144
18884.2	80		15021.5	160
18898.3	82		15032.7	145
18912.4	84		15043.9	143
18926.5	86		15055.1	156
18940.5	92		15066.3	147
18954.6	89		15077.5	145
18968.7	88		15088.7	145
18982.8	70		15099.9	158
18996.9	81		15111.1	151
19011	89		15122.3	162
19025.1	88		15133.5	144
19039.2	80		15144.7	148
19053.2	96		15155.9	146
19067.3	93		15167.1	145
19081.4	83		15178.3	154
19095.5	81		15189.6	154
19109.5	87		15200.8	142
19123.6	79		15212	141
19137.7	85		15223.2	158
19151.8	86		15234.4	148
19165.9	90		15245.6	144
19179.9	93		15256.8	158
19194	88		15268	157
19208.1	82		15279.2	162
19222.2	77		15290.4	148
19236.3	81		15301.6	146
19250.4	95		15312.8	156
19264.4	82		15324	151
19278.5	88		15335.2	154
19292.6	90		15346.4	146
19306.7	87		15357.6	153
19320.8	92		15368.8	144
19334.8	80		15380	138
19348.9	76		15391.2	147
19363	90		15402.4	147
19377.1	90		15413.6	148
19391.2	86		15424.8	145
19405.2	95		15436	140
19419.3	84		15447.2	159
19433.4	92		15458.4	138
19447.5	83		15469.6	159
19461.6	87		15480.8	156
19475.7	69		15492	146
19489.7	105		15503.2	154
19503.8	94		15514.4	146
19517.9	69		15525.6	148
19532	92		15536.8	155
19546	83		15548	152
19560.1	82		15559.2	151
19574.2	91		15570.4	147
19588.3	76		15581.6	162
19602.4	85		15592.8	147
19616.4	85		15604	146
19630.5	84		15615.3	148
19644.6	83		15626.4	138
19658.7	78		15637.7	150
19672.8	78		15648.9	150
19686.9	81		15660.1	166
19701	81		15671.3	142
19715	73		15682.5	152
19729.1	82		15693.7	145
19743.2	66		15704.9	141
19757.3	71		15716.1	148
19771.4	84		15727.3	158
19785.4	94		15738.5	160
19799.5	85		15749.7	143
19813.6	85		15760.9	153
19827.7	80		15772.1	151
19841.8	71		15783.3	147
19855.9	83		15794.5	134
19869.9	74		15805.7	154
19884	86		15816.9	151
19898.1	89		15828.1	145
19912.2	98		15839.3	137
19926.3	77		15850.5	149
19940.4	93		15861.7	143
19954.4	93		15872.9	149
19968.5	87		15884.1	139
19982.6	90		15895.3	153
19996.7	89		15906.5	157
20010.8	88		15917.7	153
20024.8	88		15928.9	158
20038.9	76		15940.1	154
20052.9	104		15951.3	148
20067	89		15962.5	159
20081.1	91		15973.7	146
20095.2	90		15984.9	144
20109.2	81		15996.1	162
20123.3	86		16007.3	156
20137.4	91		16018.5	149
20151.5	84		16029.7	144
20165.5	71		16040.9	150
20179.6	92		16052.1	152
20193.7	82		16063.3	146
20207.8	84		16074.5	155
20221.9	88		16085.7	142
20235.9	91		16096.9	143
20250	95		16108.1	147
20264.1	80		16119.4	138
20278.2	81		16130.5	143
20292.2	98		16141.8	161
20306.3	87		16153	140
20320.3	77		16164.1	149
20334.4	80		16175.4	161
20348.5	92		16186.5	143
20362.5	80		16197.8	147
20376.6	86		16209	150
20390.7	80		16220.1	147
20404.8	91		16231.4	139
20418.9	87		16242.6	135
20432.9	74		16253.8	159
20447	88		16265	144
20461.1	90		16276.1	146
20475.2	74		16287.4	148
20489.3	91		16298.5	158
20503.4	91		16309.8	145
20517.4	82		16321	148
20531.5	77		16332.2	139
20545.6	86		16343.4	159
20559.7	76		16354.6	146
20573.8	69		16365.8	138
20587.8	87		16377	146
20601.9	97		16388.2	153
20616	83		16399.3	145
20630.1	83		16410.5	148
20644.2	73		16421.7	148
20658.3	66		16432.9	146
20672.3	91		16444.1	150
20686.4	73		16455.3	149
20700.5	86		16466.5	154
20714.6	86		16477.7	144
20728.7	82		16488.9	142
20742.7	83		16500.1	149
20756.8	83		16511.3	141
20770.9	94		16522.5	146
20785	92		16533.7	151
20799.1	90		16545	139
20813.1	77		16556.1	151
20827.2	89		16567.4	159
20841.3	83		16578.5	149
20855.4	76		16589.8	157
20869.5	80		16600.9	158
20883.6	68		16612.1	150
20897.6	80		16623.4	152
20911.7	65		16634.5	155
20925.8	80		16645.7	147
20939.9	79		16657	152
20954	74		16668.2	153
20968	86		16679.4	136
20982.1	85		16690.6	138
20996.2	78		16701.8	148
21010.3	72		16713	144
21024.4	90		16724.2	145
21038.5	87		16735.4	146
21052.5	85		16746.6	148
21066.6	81		16757.8	151
21080.7	75		16769	143
21094.8	87		16780.2	144
21108.9	82		16791.4	146
21122.9	67		16802.6	148
21137	84		16813.8	144
21151.1	67		16825	145
21165.2	90		16836.2	149
21179.3	69		16847.4	157
21193.4	103		16858.6	151
21207.4	77		16869.8	148
21221.5	89		16881	136
21235.6	90		16892.2	140
21249.7	94		16903.4	155
21263.8	72		16914.6	147
21277.8	85		16925.8	140
21291.9	80		16937	150
21306	94		16948.2	149
21320.1	78		16959.4	155
21334.2	78		16970.6	142
21348.2	88		16981.8	140
21362.3	83		16993	152
21376.4	97		17004.2	148
21390.5	93		17015.4	142
21404.6	78		17026.6	139
21418.7	76		17037.8	149
21432.7	87		17049	147
21446.8	77		17060.2	150
21460.9	85		17071.4	149
21475	83		17082.6	145
21489.1	86		17093.8	148
21503.1	80		17105	149
21517.2	79		17116.2	152
21531.3	83		17127.4	148
21545.4	88		17138.6	164
21559.5	80		17149.8	158
21573.5	100		17161	149
21587.6	79		17172.2	147
21601.7	77		17183.4	152
21615.8	94		17194.6	145
21629.9	97		17205.8	146
21643.9	82		17217	162
21658	69		17228.2	150
21672.1	71		17239.4	147
21686.2	79		17250.6	142
21700.3	95		17261.8	156
21714.4	86		17273	151
21728.4	77		17284.2	144
21742.5	91		17295.4	146
21756.6	70		17306.6	155
21770.7	83		17317.8	140
21784.8	96		17329	154
21798.8	87		17340.2	158
21812.9	96		17351.6	158
21827	94		17362.8	139
21841.1	86		17374	163
21855.2	88		17385.2	159
21869.2	85		17396.4	160
21883.3	80		17407.6	151
21897.4	81		17418.8	159
21911.5	67		17430	141
21925.6	71		17441.2	144
21939.6	84		17452.4	148
21953.7	75		17463.6	141
21967.8	98		17474.8	135
21981.9	63		17486	153
21996	76		17497.2	149
22010.1	72		17508.4	142
22024.1	77		17519.6	153
22038.2	74		17530.8	151
22052.3	65		17542	150
22066.4	69		17553.2	150
22080.5	87		17564.4	149
22094.5	71		17575.6	150
22108.6	60		17586.8	144
22122.7	91		17598	154
22136.8	89		17609.2	147
22150.9	75		17620.4	144
22165	65		17631.6	157
22179	66		17642.8	158
22193.1	75		17654	138
22207.2	92		17665.2	149
22221.2	79		17676.4	152
22235.3	82		17687.6	153
22249.4	66		17698.8	156
22263.4	81		17710	152
22277.5	72		17721.2	142
22291.5	73		17732.4	149
22305.6	68		17743.6	148
22319.7	76		17754.8	148
22333.7	85		17766	143
22347.8	70		17777.2	154
22361.9	65		17788.4	157
22376	82		17799.6	148
22390.1	74		17810.8	134
22404.1	82		17822	143
22418.2	80		17833.2	149
22432.3	81		17844.4	140
22446.4	84		17855.6	149
22460.5	82		17866.8	150
22474.6	84		17878	132
22488.6	82		17889.2	156
22502.7	93		17900.4	146
22516.8	78		17911.6	150
22530.9	82		17922.8	156
22545	67		17934	152
22559.1	91		17945.2	154
22573.1	75		17956.4	139
22587.2	78		17967.6	146
22601.3	76		17978.8	153
22615.4	72		17990	149
22629.5	79		18001.2	148
22643.5	78		18012.4	152
22657.6	89		18023.6	146
22671.7	71		18034.8	148
22685.8	63		18046	133
22699.9	96		18057.2	153
22714	70		18068.4	146
22728	73		18079.6	158
22742.1	74		18090.8	145
22756.2	56		18102	145
22770.3	79		18113.2	160
22784.4	59		18124.4	153
22798.4	59		18135.6	145
22812.5	89		18146.8	148
22826.6	86		18158	143
22840.7	52		18169.2	147
22854.7	75		18180.4	140
22868.8	73		18191.7	139
22882.9	66		18202.8	146
22897	74		18214	149
22911.1	81		18225.3	138
22925.2	78		18236.5	139
22939.2	88		18247.7	154
22953.3	84		18258.8	147
22967.4	94		18270	144
22981.5	80		18281.2	146
22995.6	82		18292.4	147
23009.6	82		18303.6	154
23023.7	76		18314.8	141
23037.8	67		18326	158
23051.9	84		18337.2	150
23066	72		18348.4	153
23080	67		18359.6	137
23094.1	67		18370.8	151
23108.2	86		18382	149
23122.3	85		18393.2	159
23136.4	81		18404.4	151
23150.4	91		18415.6	151
23164.5	89		18426.8	143
23178.6	88		18438	142
23192.7	89		18449.2	154
23206.8	77		18460.4	159
23220.9	64		18471.6	142
23234.9	76		18482.8	139
23249	77		18494	140
23263.1	90		18505.2	149
23277.2	68		18516.4	161
23291.3	82		18527.6	152
23305.4	78		18538.8	142
23319.5	63		18550	148
23333.5	73		18561.2	153
23347.6	81		18572.4	145
23361.7	76		18583.6	136
23375.8	78		18594.8	144
23389.9	77		18606	147
23403.9	82		18617.2	162
23418	81		18628.4	145
23432.1	85		18639.6	143
23446.2	58		18650.8	148
23460.3	80		18662	152
23474.3	75		18673.2	146
23488.4	68		18684.4	152
23502.5	85		18695.6	137
23516.6	84		18706.8	146
23530.7	81		18718	137
23544.8	91		18729.2	157
23558.8	79		18740.4	142
23572.9	74		18751.7	151
23587	70		18762.8	142
23601.1	84		18774	153
23615.2	74		18785.2	139
23629.2	70		18796.4	138
23643.3	93		18807.6	141
23657.4	83		18818.8	154
23671.5	65		18830	152
23685.6	73		18841.2	147
23699.7	76		18852.4	142
23713.7	85		18863.6	154
23727.8	89		18874.9	143
23741.9	93		18886	150
23756	58		18897.3	152
23770.1	80		18908.5	149
23784.1	92		18919.7	147
23798.2	59		18930.9	146
23812.3	76		18942	155
23826.4	73		18953.2	140
23840.5	86		18964.4	150
23854.5	91		18975.6	164
23868.6	77		18986.8	139
23882.7	77		18998.1	143
23896.8	86		19009.3	148
23910.9	84		19020.5	146
23925	76		19031.7	148
23939	64		19042.8	149
23953.1	68		19054.1	146
23967.2	72		19065.3	151
23981.3	78		19076.5	145
23995.4	74		19087.7	147
24009.5	74		19098.9	149
24023.5	94		19110.1	148
24037.6	82		19121.3	153
24051.7	79		19132.5	144
24065.8	76		19143.7	155
24079.9	75		19154.9	147
24093.9	83		19166.1	143
24108	77		19177.3	142
24122.1	85		19188.4	153
24136.2	89		19199.7	161
24150.3	78		19210.9	148
24164.4	85		19222.1	141
24178.4	64		19233.3	155
24192.5	70		19244.5	150
24206.6	80		19255.7	144
24220.6	75		19266.9	152
24234.7	78		19278.1	149
24248.7	88		19289.3	151
24262.8	82		19300.5	138
24276.9	82		19311.7	143
24290.9	78		19322.9	157
24305	87		19334.1	149
24319.1	76		19345.3	149
24333.1	81		19356.5	158
24347.2	71		19367.7	142
24361.3	73		19378.9	154
24375.4	95		19390.1	149
24389.5	83		19401.3	154
24403.6	76		19412.5	158
24417.6	77		19423.7	148
24431.7	73		19434.9	154
24445.8	80		19446.1	137
24459.9	69		19457.3	146
24474	75		19468.5	141
24488	80		19479.7	142
24502.1	69		19490.9	152
24516.2	78		19502.1	146
24530.3	86		19513.3	148
24544.4	74		19524.5	155
24558.4	77		19535.7	151
24572.5	68		19546.9	160
24586.6	70		19558.1	148
24600.7	77		19569.3	158
24614.8	84		19580.5	147
24628.9	85		19591.7	149
24643	76		19602.9	154
24657	71		19614.1	131
24671.1	58		19625.3	144
24685.2	79		19636.5	151
24699.3	88		19647.7	152
24713.4	80		19658.9	154
24727.4	85		19670.1	152
24741.5	71		19681.3	144
24755.6	81		19692.5	145
24769.7	62		19703.7	155
24783.8	90		19714.9	143
24797.9	78		19726.1	152
24811.9	90		19737.3	158
24826	86		19748.6	157
24840.1	82		19759.8	148
24854.2	79		19770.9	150
24868.3	77		19782.2	149
24882.4	73		19793.4	160
24896.5	72		19804.6	144
24910.5	58		19815.7	150
24924.6	75		19826.9	160
24938.7	83		19838.2	151
24952.8	65		19849.4	153
24966.9	82		19860.5	151
24980.9	78		19871.7	155
24995	73		19882.9	153
25009.1	79		19894.2	154
25023.2	82		19905.4	147
25037.3	78		19916.6	135
25051.3	78		19927.8	140
25065.4	87		19939	154
25079.5	67		19950.2	131
25093.6	94		19961.4	158
25107.7	80		19972.6	148
25121.8	83		19983.8	146
25135.8	81		19995	140
25149.9	71		20006.2	139
25164	76		20017.4	146
25178.1	73		20028.6	158
25192.2	81		20039.8	153
25206.3	75		20051	146
25220.3	80		20062.2	150
25234.4	79		20073.3	143
25248.5	76		20084.5	143
25262.6	81		20095.7	150
25276.7	83		20106.9	142
25290.7	78		20118.1	147
25304.8	74		20129.3	146
25318.9	64		20140.5	143
25333	84		20151.7	153
25347.1	79		20162.9	154
25361.1	86		20174.1	152
25375.2	70		20185.3	143
25389.3	85		20196.5	144
25403.4	63		20207.7	148
25417.5	74		20218.9	146
25431.6	84		20230.1	147
25445.6	67		20241.3	155
25459.7	89		20252.5	154
25473.8	80		20263.7	149
25487.9	81		20274.9	158
25502	90		20286.1	156
25516	77		20297.3	152
25530.1	72		20308.5	152
25544.2	69		20319.7	157
25558.3	70		20330.9	140
25572.4	66		20342.1	148
25586.4	86		20353.3	156
25600.5	87		20364.5	155
25614.6	77		20375.7	155
25628.7	73		20386.9	146
25642.8	78		20398.1	148
25656.8	71		20409.3	144
25670.9	80		20420.5	145
25685	69		20431.7	146
25699.1	81		20442.9	145
25713.2	89		20454.1	148
25727.3	64		20465.3	150
25741.3	70		20476.5	141
25755.4	82		20487.7	140
25769.5	75		20498.9	160
25783.6	79		20510.1	146
25797.7	86		20521.3	153
25811.8	75		20532.5	143
25825.8	61		20543.7	144
25839.9	74		20554.9	149
25854	76		20566.1	145
25868.1	84		20577.3	151
25882.2	69		20588.5	149
25896.2	83		20599.7	146
25910.3	67		20610.9	152
25924.4	86		20622.1	144
25938.5	73		20633.3	153
25952.6	93		20644.5	144
25966.6	64		20655.7	141
25980.7	85		20666.9	146
25994.8	79		20678.1	155
26008.9	85		20689.3	146
26023	84		20700.5	141
26037	92		20711.7	151
26051.1	80		20722.9	150
26065.2	81		20734.1	152
26079.3	77		20745.3	140
26093.4	65		20756.5	149
26107.5	71		20767.7	152
26121.5	79		20778.9	152
26135.6	88		20790.1	132
26149.7	72		20801.3	142
26163.7	70		20812.5	133
26177.8	85		20823.7	149
26191.9	80		20834.9	150
26205.9	70		20846.1	146
26220	79		20857.3	146
26234	86		20868.5	141
26248.1	64		20879.7	146
26262.2	71		20890.9	160
26276.2	76		20902.1	154
26290.3	75		20913.3	157
26304.4	75		20924.5	150
26318.4	70		20935.7	146
26332.5	70		20946.9	142
26346.6	70		20958.1	138
26360.6	84		20969.3	146
26374.7	70		20980.5	136
26388.8	75		20991.7	137
26402.9	75		21002.9	142
26417	79		21014.1	149
26431	74		21025.3	152
26445.1	84		21036.5	150
26459.2	58		21047.7	158
26473.3	80		21058.9	150
26487.4	73		21070.1	166
26501.5	74		21081.3	146
26515.5	72		21092.5	143
26529.6	62		21103.7	150
26543.7	75		21114.9	152
26557.8	81		21126.1	145
26571.9	77		21137.3	147
26585.9	75		21148.5	143
26600	78		21159.7	145
26614.1	79		21170.9	140
26628.2	79		21182.1	147
26642.3	81		21193.3	142
26656.3	68		21204.5	157
26670.4	76		21215.7	128
26684.5	76		21226.9	148
26698.6	71		21238.1	146
26712.7	74		21249.4	148
26726.8	72		21260.6	152
26740.8	80		21271.8	137
26754.9	73		21282.9	139
26769	65		21294.1	165
26783.1	82		21305.3	139
26797.1	71		21316.5	150
26811.2	82		21327.7	148
26825.3	74		21338.9	143
26839.4	78		21350.1	148
26853.5	77		21361.3	158
26867.6	78		21372.5	149
26881.6	84		21383.7	156
26895.7	79		21394.9	155
26909.8	76		21406.1	138
26923.9	78		21417.3	140
26938	64		21428.5	150
26952.1	67		21439.7	150
26966.1	79		21450.9	159
26980.2	62		21462.1	153
26994.3	59		21473.3	145
27008.4	83		21484.5	152
27022.5	64		21495.7	148
27036.5	74		21506.9	145
27050.6	72		21518.1	143
27064.7	86		21529.3	147
27078.8	61		21540.5	137
27092.9	86		21551.7	163
27106.9	87		21562.9	160
27121	79		21574.1	164
27135.1	69		21585.3	134
27149.2	76		21596.5	146
27163.3	79		21607.7	153
27177.4	63		21618.9	151
27191.4	67		21630.1	146
27205.5	78		21641.3	152
27219.6	68		21652.5	148
27233.7	75		21663.7	143
27247.8	78		21674.9	144
27261.8	73		21686.1	152
27275.9	68		21697.3	152
27290	65		21708.5	154
27304.1	94		21719.7	129
27318.2	71		21730.9	150
27332.3	74		21742.1	150
27346.3	77		21753.3	153
27360.4	70		21764.5	153
27374.5	80		21775.7	144
27388.6	69		21786.9	145
27402.7	81		21798.1	162
27416.7	65		21809.3	148
27430.8	87		21820.5	146
27444.9	67		21831.7	147
27459	66		21842.9	136
27473.1	73		21854.1	156
27487.2	81		21865.3	139
27501.2	80		21876.5	141
27515.3	73		21887.7	146
27529.4	72		21898.9	156
27543.5	82		21910.1	147
27557.6	66		21921.3	156
27571.7	74		21932.5	146
27585.8	78		21943.7	147
27599.8	73		21954.9	137
27613.9	83		21966.1	147
27628	80		21977.3	145
27642.1	79		21988.5	160
27656.2	81		21999.7	151
27670.2	64		22010.9	162
27684.3	77		22022.1	159
27698.4	65		22033.3	149
27712.5	69		22044.5	146
27726.6	78		22055.7	148
27740.6	76		22066.8	144
27754.7	90		22078	148
27768.8	70		22089.3	145
27782.9	83		22100.5	146
27797	77		22111.7	143
27811.1	67		22122.9	153
27825.1	74		22134.1	145
27839.2	82		22145.3	151
27853.3	73		22156.5	155
27867.4	79		22167.7	149
27881.5	81		22178.9	141
27895.5	78		22190.1	154
27909.6	69		22201.3	141
27923.7	72		22212.5	152
27937.8	61		22223.7	151
27951.9	73		22234.9	150
27965.9	83		22246.1	153
27980	78		22257.3	132
27994.1	65		22268.5	153
28008.2	86		22279.7	155
28022.3	60		22290.9	145
28036.4	68		22302.1	157
28050.4	70		22313.3	144
28064.5	68		22324.5	151
28078.6	82		22335.7	158
28092.7	75		22346.9	147
28106.8	88		22358.1	151
28120.8	73		22369.3	147
[truncated: 971 more rows]
