# Supplementary material for: ARL3 activation requires the co-GEF BART and effector-mediated turnover
Source: eLife. 2021 Jan 13;10:e64624. doi: 10.7554/eLife.64624 (PMC7817177; doi:10.7554/eLife.64624)
Supplement: Figure 3—source data 3. [file elife-64624-fig3-data3.xlsx]

## Sheet: Sheet1
	intrinsic		time	0	1	2	3	5	10	20	uM BART
0	244		9.987	250	262	238	238	209	177	187
10.044	250		29.974	252	250	222	229	171	103	122
19.961	251		49.961	254	236	209	199	135	85	91
29.873	243		59.955	246	204	201	148	117	88	61
39.786	255		69.945	249	218	201	178	100	76	64
49.694	244		79.949	243	224	186	167	85	70	59
59.596	251		89.939	247	203	191	153	86	66	65
69.505	258		99.927	241	195	180	92	82	70	53
79.403	239		109.919	240	207	167	131	75	66	48
89.312	260		129.9	235	197	156	101	81	67	59
99.212	260		149.886	232	182	146	105	73	78	47
109.113	250		169.873	233	166	148	85	66	79	53
119.019	243		189.866	218	176	130	90	68	66	68
128.934	257		209.837	227	169	130	86	65	72	69
138.85	250		219.82	228	159	139	58	73	64	58
148.751	250		229.8	213	161	126	72	63	63	58
158.664	251		239.787	219	164	127	88	62	69	50
168.562	251		249.777	220	146	114	97	64	62	50
178.471	247		259.765	214	147	124	66	72	76	59
188.393	251		269.759	221	148	114	89	53	54	49
198.308	257		279.739	219	141	100	59	72	58	46
208.228	246		289.716	219	129	114	41	63	68	55
218.128	254		299.698	222	143	111	63	66	65	52
228.037	247		309.682	218	138	103	65	62	63	45
237.943	247		319.67	208	134	109	57	64	65	49
247.849	251		329.651	205	147	101	68	54	61	66
257.749	249		339.654	215	138	108	62	64	65	32
267.661	251		349.632	212	136	92	57	64	67	45
277.565	249		359.639	210	136	94	70	58	55	37
287.482	254		369.631	214	122	90	58	69	68	51
297.4	264		379.628	217	119	113	67	55	68	41
307.301	248		389.622	207	129	96	57	48	70	36
317.2	251		399.601	203	117	98	78	66	65	35
327.09	251		409.586	208	124	92	64	61	64	48
336.997	243		419.568	207	113	100	59	62	64	44
346.899	247		429.551	203	125	94	50	66	59	55
356.798	247		439.531	212	111	103	52	66	59	48
366.716	241		449.514	204	110	91	123	65	72	44
376.612	247		459.5	202	109	86	59	60	57	55
386.527	248		469.484	198	111	87	56	69	76	54
396.435	251		479.478	195	91	97	46	62	67	36
406.367	250		489.457	201	120	85	69	60	67	46
416.281	248		499.445	203	103	89	45	49	59	41
426.204	245		519.415	192	115	81	67	63	56	35
436.11	241		529.407	199	110	81	89	57	65	45
446.016	254		539.388	189	109	72	75	57	65	42
455.926	245		549.373	194	113	84	64	63	71	38
465.823	238		559.347	190	103	83	86	59	62	43
475.734	246		569.342	182	107	81	94	66	54	49
485.71	243		579.33	193	94	71	77	63	51	44
495.615	246		589.315	193	114	66	90	46	61	37
505.517	236		599.305	203	108	75	72	70	63	38
515.438	246		619.253	194	100	81	56	50	74	46
525.336	244		629.229	188	107	74	58	54	62	40
535.245	242		639.206	183	108	59	67	45	43	43
545.143	245		649.18	177	95	72	64	58	58	44
555.044	240		659.173	181	101	74	50	55	51	40
564.943	245		679.139	192	103	73	59	56	58	57
574.84	246		689.119	188	104	70	45	47	47	43
584.75	256		699.098	179	94	68	69	59	45	39
594.664	241		709.076	182	89	69	37	54	67	43
604.659	247		719.055	173	80	73	51	52	45	47
614.579	250		729.032	179	103	75	58	61	54	43
624.493	245		748.995	188	90	63	66	62	50	42
634.412	250		758.978	187	94	53	52	48	57	43
644.314	244		768.95	185	94	72	51	66	62	36
654.227	239		778.925	183	93	65	55	67	67	44
664.135	244		798.9	178	93	75	51	47	57	43
674.038	245		818.863	174	96	57	50	53	58	52
683.938	237		878.716	163	69	61	40	51	64	38
693.853	248		898.67	174	93	65	59	59	58	46
703.759	246		918.633	162	102	54	57	55	59	29
713.66	249		938.587	162	89	71	48	52	56	34
723.573	242		958.554	174	82	65	57	51	62	35
733.473	232		978.517	162	86	65	61	65	54	39
743.39	251		998.492	155	76	74	61	57	68	42
753.288	240		1018.46	166	80	77	62	54	65	60
763.186	248		1038.4	172	59	56	45	49	55	35
773.087	239
782.989	247
792.895	226
802.798	246
812.713	245
822.619	249
832.514	248
842.43	241
852.343	244
862.249	247
872.146	249
882.061	236
891.961	240
901.868	249
911.758	249
921.677	241
931.587	237
941.489	250
951.4	241
961.292	239
971.21	242
981.11	237
991.008	243
1000.91	237
1010.81	238
1020.72	241
1030.68	248
1040.6	237
1050.52	247
1060.44	247
1070.36	247
1080.27	243
1090.18	249
1100.08	246
1109.99	251
1119.89	243
1129.87	249
1139.78	249
1149.69	243
1159.58	240
1169.48	254
1179.38	253
1189.28	236
1199.18	236
1209.08	252
1218.97	247
1228.87	242
1238.77	243
1248.68	238
1258.61	247
1268.54	245
1278.44	242
1288.37	246
1298.28	245
1308.18	239
1318.09	238
1328.06	241
1338.05	246
1347.95	240
1357.85	240
1367.75	247
1377.75	241
1387.65	250
1397.57	246
1407.47	252
1417.37	251
1427.28	254
1437.17	241
1447.08	248
1456.97	250
1466.87	245
1476.79	250
1486.7	243
1496.62	252
1506.54	236
1516.45	238
1526.35	235
1536.26	238
1546.16	242
1556.1	240
1566	245
1575.89	250
1585.8	242
1595.7	244
1605.6	243
1615.5	250
1625.45	246
1635.34	244
1645.24	244
1655.15	244
1665.05	239
1674.96	241
1684.87	234
1694.79	245
1704.7	248
1714.62	242
1724.55	234
1734.46	253
1744.37	235
1754.32	243
1764.23	247
1774.13	243
1784.04	250
