# Supplementary material for: ARL3 activation requires the co-GEF BART and effector-mediated turnover
Source: eLife. 2021 Jan 13;10:e64624. doi: 10.7554/eLife.64624 (PMC7817177; doi:10.7554/eLife.64624)
Supplement: Figure 3—source data 4. [file elife-64624-fig3-data4.xlsx]

## Sheet: Sheet1
time (s)	ARL13B	+UNC	+PDEd	+BART
0	259	260	263	261
8.803	255	258	261	265
17.589	261	261	262	251
26.379	258	258	264	253
35.169	255	251	262	239
43.971	254	251	256	241
52.772	255	258	269	242
61.558	254	256	258	237
70.365	245	249	260	238
79.164	256	248	267	223
87.958	247	243	260	229
96.769	253	256	256	231
105.561	250	247	267	226
114.369	256	245	255	215
123.186	252	242	262	220
131.976	248	244	259	209
140.778	252	231	264	213
149.568	259	256	263	214
158.384	245	247	263	220
167.195	238	246	253	204
175.994	244	252	259	204
184.8	243	252	252	211
193.589	243	239	255	199
202.399	243	254	259	200
211.208	240	229	261	198
219.996	239	243	258	192
228.8	242	245	250	186
237.593	241	244	254	200
246.38	237	244	252	182
255.189	255	245	252	194
263.979	243	250	259	190
272.783	245	240	254	192
281.582	233	240	237	185
290.374	244	243	255	188
299.186	242	233	244	192
307.97	237	244	247	183
316.774	247	237	247	185
325.573	237	241	250	186
334.378	235	237	253	175
343.171	229	242	256	176
351.959	232	242	255	185
360.767	231	231	253	181
369.574	242	230	255	164
378.372	238	221	256	177
387.18	244	231	248	176
395.969	241	242	258	178
404.761	248	230	250	168
413.565	239	233	241	182
422.351	237	230	256	180
431.149	233	236	247	170
439.942	231	239	244	160
448.735	241	242	249	173
457.531	236	242	233	161
466.334	225	242	245	175
475.13	232	244	244	175
483.923	231	237	244	167
492.719	239	232	251	163
501.525	232	231	243	162
510.33	236	229	247	161
519.131	229	236	254	164
527.934	234	231	249	159
536.73	239	236	245	158
545.542	234	239	242	163
554.351	229	234	239	166
563.146	237	237	248	159
571.939	221	231	245	159
580.743	234	230	249	163
589.555	234	231	257	160
598.37	230	235	247	159
607.165	224	241	239	156
615.97	234	231	243	162
624.758	228	231	251	159
633.554	230	231	248	160
642.355	233	221	243	143
651.153	233	224	246	146
659.947	236	221	242	161
668.728	226	233	233	149
677.519	225	234	245	154
686.322	224	233	246	151
695.116	231	232	241	160
703.914	232	226	239	143
712.717	218	226	237	151
721.51	226	229	241	143
730.313	232	223	232	151
739.107	221	224	249	139
747.899	232	227	240	143
756.71	225	221	246	138
765.507	223	224	233	150
774.306	224	223	238	144
783.131	217	233	244	139
791.934	216	222	238	137
800.735	217	227	246	132
809.545	226	229	237	148
818.339	215	223	243	133
827.144	234	222	232	134
835.931	215	230	232	147
844.735	224	224	231	137
853.52	217	221	235	123
862.312	224	231	241	132
871.149	224	229	229	126
879.936	217	229	232	131
888.737	224	217	238	115
897.541	214	224	237	129
906.337	221	222	234	137
915.138	210	227	227	127
923.928	219	221	232	121
932.862	210	223	239	129
941.651	210	226	241	132
950.448	218	214	234	114
959.243	218	225	232	127
968.027	211	221	239	134
976.823	213	222	231	124
985.618	218	221	235	114
994.421	225	220	231	128
1003.24	212	224	230	131
1012.04	229	216	228	129
1020.84	215	234	250	123
1029.63	214	224	225	135
1038.41	210	209	236	113
1047.21	208	223	231	109
1056.01	211	222	234	111
1064.8	214	224	237	107
1073.59	212	217	235	122
1082.39	205	217	226	118
1091.18	218	219	232	112
1099.97	217	217	230	106
1108.77	206	215	232	115
1117.56	205	212	233	109
1126.36	215	224	230	106
1135.15	204	217	233	114
1143.95	209	220	233	108
1152.74	209	213	232	105
1161.55	204	214	241	99
1170.35	209	218	224	99
1179.14	209	220	231	109
1187.93	212	213	224	101
1196.73	206	217	229	97
1205.54	195	209	222	94
1214.35	208	220	224	108
1223.15	209	207	230	105
1231.94	214	206	230	115
1240.74	200	208	234	114
1249.54	200	210	223	87
1258.35	203	220	228	96
1267.15	211	212	224	88
1275.94	207	218	216	93
1284.75	208	212	229	88
1293.55	212	209	225	89
1302.35	218	216	225	90
1311.15	199	205	220	104
1319.94	207	211	222	93
1328.75	192	204	221	96
1337.54	199	212	233	98
1346.34	201	212	226	89
1355.14	203	194	215	96
1363.94	204	201	217	93
1372.74	209	197	218	96
1381.54	197	209	218	82
1390.34	195	199	214	103
1399.14	206	211	218	87
1407.95	197	201	210	84
1416.75	202	215	222	93
