# Supplementary material for: ARL3 activation requires the co-GEF BART and effector-mediated turnover
Source: eLife. 2021 Jan 13;10:e64624. doi: 10.7554/eLife.64624 (PMC7817177; doi:10.7554/eLife.64624)
Supplement: Figure 3—source data 5. [file elife-64624-fig3-data5.xlsx]

## Sheet: Sheet1
	2uM truncArl3mD+150uM GppNHp
time	intrinsic	0.2uM 13B	+20uM BART
0	257	258	260
9.943	272	260	254
19.881	261	262	256
29.815	260	257	261
39.764	263	259	254
49.696	259	252	250
59.636	257	242	244
69.568	265	245	248
79.503	269	244	232
89.445	261	253	235
99.379	268	258	234
109.323	267	244	222
119.272	254	256	224
129.223	263	242	223
139.161	257	242	209
149.102	261	243	208
159.046	260	240	203
168.991	258	238	198
178.928	254	244	201
188.868	253	237	193
198.807	256	243	196
208.739	253	240	194
218.682	261	230	179
228.636	249	239	180
238.574	257	243	180
248.514	258	222	171
258.451	262	229	166
268.395	252	231	177
278.331	251	234	160
288.279	254	230	153
298.227	251	229	151
308.158	260	222	155
318.105	251	224	153
328.035	252	232	142
337.984	253	231	149
347.93	254	226	146
357.867	251	221	136
367.799	255	221	137
377.728	247	211	137
387.661	258	218	131
397.593	253	227	127
407.524	254	219	126
417.46	249	216	129
427.401	248	213	138
437.343	244	201	121
447.279	243	209	123
457.221	250	209	122
467.15	252	208	119
477.092	249	220	114
487.031	241	219	113
496.972	256	211	124
506.91	251	209	117
516.853	248	204	116
526.792	243	196	110
536.722	245	196	109
546.661	246	205	99
556.613	249	188	107
566.576	249	201	111
576.526	249	198	100
586.475	245	202	104
596.416	248	196	112
606.35	239	192	99
616.277	243	199	102
626.209	247	193	102
636.148	241	190	94
646.082	242	186	94
656.032	242	195	91
665.972	237	186	102
675.903	236	191	94
685.838	241	186	90
695.788	240	193	103
705.725	247	185	88
715.661	239	180	98
725.592	238	183	93
735.527	244	177	88
745.459	239	190	88
755.404	240	193	77
765.336	242	175	88
775.289	239	177	97
785.231	238	169	95
795.182	239	184	89
805.125	242	180	81
815.065	231	178	89
825.012	235	179	77
834.954	231	177	94
844.897	231	175	76
854.833	239	177	88
864.767	240	175	89
874.703	232	174	96
884.64	227	171	82
894.583	243	163	91
904.515	232	171	87
914.464	236	181	82
924.4	225	159	80
934.339	229	167	83
944.28	243	168	86
954.214	236	157	69
964.159	226	163	78
974.095	238	166	78
984.036	234	163	74
993.974	236	164	76
1003.91	224	175	75
1013.85	233	163	81
1023.8	242	164	78
1033.74	222	160	76
1043.67	236	159	70
1053.61	246	156	71
1063.54	224	160	72
1073.47	237	147	66
1083.4	224	156	83
1093.34	234	156	77
1103.29	224	158	70
1113.22	224	146	80
1123.15	231	151	63
1133.09	217	159	77
1143.03	219	153	59
1152.97	240	150	71
1162.9	229	153	84
1172.85	222	151	76
1182.78	224	153	74
1192.72	225	146	76
1202.66	221	147	76
1212.6	223	146	73
1222.55	224	151	72
1232.49	225	140	78
1242.43	223	142	65
1252.37	229	128	75
1262.31	228	143	76
1272.25	222	144	69
1282.19	229	147	77
1292.13	220	141	71
1302.06	220	133	78
1311.99	227	140	62
1321.92	214	141	65
1331.86	224	139	68
1341.79	216	135	58
1351.73	227	136	64
1361.68	222	149	67
1371.6	225	147	67
1381.54	219	137	67
1391.47	212	141	69
1401.42	213	134	61
1411.36	227	134	74
1421.31	221	141	67
1431.25	215	136	62
1441.18	226	134	58
1451.14	220	132	62
1461.09	215	131	71
1471.03	215	132	56
1480.97	215	118	55
1490.93	213	123	51
1500.87	217	119	58
1510.8	214	135	58
1520.73	209	128	68
1530.67	217	124	66
1540.62	217	130	64
1550.56	203	129	67
1560.49	212	140	61
1570.43	210	129	54
1580.36	217	121	58
1590.31	210	128	62
1600.24	217	117	69
1610.18	217	125	61
1620.13	207	112	59
1630.06	203	122	50
1640	214	118	51
1649.92	210	120	46
1659.87	206	124	43
1669.81	211	124	51
1679.75	200	115	51
1689.69	205	123	62
1699.62	213	121	57
1709.56	210	114	48
1719.49	205	119	59
1729.43	203	124	54
1739.37	205	117	48
1749.31	209	118	54
1759.24	206	114	56
1769.19	211	114	59
1779.13	206	109	57
1789.06	192	117	52
1799	201	117	49
1808.96	206	111	51
1818.9	203	109	57
1828.85	204	110	51
1838.78	202	114	52
1848.72	205	101	53
1858.65	203	104	43
1868.6	186	105	45
1878.54	200	113	60
1888.49	192	104	48
1898.44	203	117	51
1908.37	209	106	55
1918.31	197	105	62
1928.24	200	125	31
1938.18	200	110	47
1948.12	200	105	44
1958.05	204	111	53
1967.98	195	106	55
1977.91	202	95	57
1987.84	202	113	36
1997.78	199	110	48
2007.72	193	109	50
2017.66	197	101	51
2027.59	204	95	55
2037.53	192	98	60
2047.46	199	101	45
2057.4	198	91	46
2067.34	203	99	45
2077.29	195	103	49
2087.23	188	106	50
2097.18	194	103	46
2107.12	189	104	48
2117.07	189	99	40
2127.01	196	101	49
2136.96	198	97	48
2146.9	195	91	55
2156.84	182	105	44
2166.77	189	107	45
2176.71	195	106	42
2186.64	186	103	44
2196.58	189	99	48
2206.51	200	101	44
2216.46	195	95	46
2226.39	188	96	52
2236.34	189	102	42
2246.28	190	105	54
2256.22	190	101	58
2266.17	190	100	36
2276.11	178	96	47
2286.04	195	95	51
2295.97	189	94	50
2305.91	198	98	54
2315.84	190	97	57
2325.77	190	99	38
2335.71	190	89	59
2345.65	195	98	48
2355.58	194	99	55
2365.52	185	97	38
2375.46	190	99	41
2385.41	186	96	47
2395.34	196	82	50
2405.28	185	93	46
2415.21	192	90	42
2425.15	189	88	44
2435.09	192	97	48
2445.03	189	88	46
2454.97	198	89	53
2464.9	183	95	44
2474.85	188	95	47
2484.78	187	85	34
2494.73	181	89	44
2504.66	183	85	35
2514.61	181	85	54
2524.57	176	89	45
2534.51	185	93	36
2544.45	188	95	58
2554.39	184	89	35
2564.33	188	91	40
2574.27	190	84	46
2584.21	185	83	41
2594.14	185	80	36
2604.07	177	82	64
2614	181	95	42
2623.93	173	106	52
2633.86	185	93	46
2643.79	184	76	38
2653.73	185	81	34
2663.66	176	89	33
2673.59	184	82	45
2683.52	191	86	33
2693.45	184	86	45
2703.39	182	82	46
2713.33	182	95	40
2723.28	180	95	44
2733.23	182	87	43
2743.18	180	92	44
2753.12	194	81	44
2763.07	187	98	40
2773.02	187	85	32
2782.96	182	82	35
2792.91	182	84	41
2802.85	174	83	41
2812.79	190	79	35
2822.73	180	86	46
2832.66	182	88	41
2842.59	175	87	48
2852.53	173	97	45
2862.47	183	91	36
2872.41	178	81	36
2882.34	185	93	48
2892.28	175	76	48
2902.22	182	80	36
2912.16	184	86	47
2922.09	189	75	34
2932.02	174	92	40
2941.96	179	79	39
2951.88	173	85	48
2961.82	174	83	46
2971.76	171	77	45
2981.7	173	78	44
2991.64	182	79	44
3001.58	182	88	35
3011.51	166	80	31
3021.45	185	85	45
3031.39	174	74	45
3041.33	177	73	42
3051.27	166	88	33
3061.21	166	79	45
3071.15	176	84	45
3081.09	176	82	43
3091.02	176	77	50
3100.97	168	75	41
3110.9	173	72	43
3120.84	182	94	38
3130.78	173	80	38
3140.72	170	73	38
3150.66	167	78	55
3160.59	173	74	41
3170.54	169	80	50
3180.49	169	83	44
3190.43	170	81	50
3200.38	163	75	54
3210.32	171	73	41
3220.26	171	81	43
3230.2	165	78	36
3240.13	177	77	39
3250.06	169	80	44
3260	166	76	46
3269.93	169	70	43
3279.86	173	70	36
3289.79	167	73	43
3299.71	173	84	46
3309.65	165	81	54
3319.59	164	73	37
3329.52	162	78	28
3339.46	168	80	38
3349.39	164	77	34
3359.36	174	86	28
3369.3	166	89	42
3379.25	166	84	41
3389.18	162	73	32
3399.12	164	70	42
3409.06	172	72	42
3419.01	166	82	49
3428.95	168	79	41
3438.89	164	76	44
3448.84	162	75	44
3458.77	155	78	35
3468.7	172	69	37
3478.64	164	72	35
3488.58	170	70	35
3498.52	154	74	48
3508.46	169	73	36
3518.41	162	83	43
3528.34	164	71	39
3538.28	160	79	42
3548.21	165	59	38
3558.14	160	68	44
3568.08	160	61	30
3578.01	160	76	43
3587.94	165	66	40
3597.87	172	57	41
3607.8	160	68	33
3617.74	159	79	50
3627.68	152	58	41
3637.62	162	70	44
3647.55	156	79	33
3657.51	165	68	32
3667.44	159	62	50
3677.38	157	64	31
3687.32	163	77	39
3697.26	164	80	51
3707.2	159	71	31
3717.14	169	74	42
3727.08	157	75	40
3737.02	163	71	35
3746.96	155	74	55
3756.9	149	69	29
3766.84	159	76	39
3776.78	166	67	33
3786.71	158	52	33
3796.65	155	75	43
3806.59	152	71	29
3816.53	154	67	52
3826.49	158	77	42
3836.44	154	64	50
3846.39	158	82	36
3856.32	161	61	43
3866.25	155	78	41
3876.18	158	73	38
3886.12	163	66	44
3896.05	151	68	35
3905.99	151	69	37
3915.92	166	65	26
3925.85	165	75	40
3935.78	171	69	33
3945.71	164	73	40
3955.65	162	82	32
3965.59	164	70	43
3975.53	159	69	41
3985.47	162	61	43
3995.4	163	60	42
4005.32	166	83	57
4015.26	166	67	47
4025.22	157	71	36
4035.17	171	74	38
4045.11	163	80	37
4055.05	148	75	46
4064.99	154	70	31
4074.93	158	69	45
4084.86	158	75	53
4094.8	164	77	50
4104.75	158	71	44
4114.68	166	76	50
4124.62	155	66	40
4134.55	162	62	40
4144.49	146	73	39
4154.44	148	77	43
4164.38	164	78	51
4174.32	152	76	41
4184.25	152	69	36
4194.18	162	76	42
4204.1	155	83	36
4214.04	153	76	51
4223.97	156	63	44
4233.91	162	73	44
4243.85	151	72	48
4253.78	157	76	47
4263.73	158	72	43
4273.68	150	73	49
4283.63	150	83	48
4293.57	163	91	31
4303.51	161	73	52
4313.45	163	80	45
4323.39	151	70	52
4333.32	163	69	34
4343.26	155	66	45
4353.2	157	77	33
4363.14	158	77	42
4373.08	160	70	41
4383.01	146	72	43
4392.95	144	68	45
4402.9	162	75	42
4412.83	151	81	51
4422.78	154	84	42
4432.71	156	74	43
4442.66	161	64	51
4452.59	149	74	52
4462.52	152	67	44
4472.46	151	69	41
4482.4	155	74	43
4492.35	150	74	46
4502.29	160	69	52
4512.21	146	63	36
4522.15	147	74	50
4532.08	149	74	44
4542.01	158	68	33
4551.93	142	78	56
4561.86	148	73	45
4571.79	141	79	50
4581.73	155	77	57
4591.67	147	76	45
4601.62	154	84	63
4611.56	146	79	40
4621.49	149	67	59
4631.44	155	74	47
4641.37	149	76	54
4651.31	144	72	49
4661.25	155	74	52
4671.19	150	68	43
4681.14	147	77	52
4691.08	141	85	42
4701.03	156	79	35
4710.97	148	71	57
4720.93	142	66	47
4730.87	161	76	40
4740.81	146	70	42
4750.75	151	69	39
4760.68	146	71	37
4770.62	146	64	52
4780.55	156	75	45
4790.49	153	68	29
4800.42	146	75	47
4810.37	146	63	60
4820.3	144	61	46
4830.22	145	69	53
4840.16	149	77	57
4850.1	150	76	44
4860.03	149	78	52
4869.97	145	61	43
4879.9	145	69	45
4889.84	154	75	41
4899.77	150	79	45
4909.72	142	79	47
4919.65	134	72	54
4929.61	138	60	39
4939.56	138	63	44
4949.5	151	73	43
4959.44	143	57	42
4969.38	141	66	46
4979.32	145	74	56
4989.27	147	71	55
4999.21	146	58	44
5009.14	150	85	55
5019.09	146	65	51
5029.02	149	64	49
5038.96	142	62	58
5048.91	150	66	53
5058.84	138	62	43
5068.78	148	64	54
5078.72	141	73	48
5088.66	141	69	40
5098.6	144	62	48
5108.54	147	69	41
5118.48	136	70	42
5128.42	144	74	44
5138.36	140	84	35
5148.3	139	77	42
5158.23	152	66	47
5168.16	148	84	39
5178.1	148	71	52
5188.03	142	70	43
5197.95	133	73	46
5207.89	138	62	42
5217.82	135	67	36
5227.76	145	60	52
5237.69	140	75	42
5247.63	140	71	51
5257.57	143	56	50
5267.51	141	66	38
5277.45	129	74	43
5287.39	144	62	43
5297.34	142	69	46
5307.3	129	72	50
5317.24	139	64	47
5327.18	141	63	50
5337.12	134	66	43
5347.06	143	68	35
5357.01	136	66	52
5366.96	133	63	38
5376.9	139	66	36
5386.84	136	61	45
5396.78	140	59	43
5406.73	127	68	53
5416.66	127	71	39
5426.59	137	62	49
5436.53	135	71	36
5446.47	148	69	44
5456.4	134	64	46
5466.33	142	65	47
5476.26	136	61	38
5486.19	142	67	42
5496.12	135	70	59
5506.06	139	74	49
5515.99	139	71	39
5525.92	136	70	51
5535.85	138	70	47
5545.78	129	70	38
5555.73	139	70	48
5565.67	142	75	51
5575.62	133	76	40
5585.57	126	65	53
5595.51	138	67	46
5605.45	142	75	39
5615.38	133	75	59
5625.32	138	58	36
5635.26	128	59	43
5645.2	127	58	43
5655.13	130	71	43
5665.06	132	69	39
5675.01	130	69	35
5684.94	131	64	44
5694.89	131	59	38
5704.82	128	76	48
5714.77	119	68	45
5724.71	133	56	46
5734.65	130	67	50
5744.59	129	63	48
5754.52	127	72	51
5764.44	127	65	47
5774.38	133	65	50
5784.32	135	68	45
5794.26	130	65	44
5804.19	132	72	44
5814.12	130	68	44
5824.05	128	62	39
5833.98	122	72	35
5843.91	119	69	56
5853.85	131	60	41
5863.79	122	64	43
5873.73	134	69	52
5883.66	131	64	39
5893.59	126	61	45
5903.54	128	72	51
5913.48	124	62	43
5923.42	131	70	47
5933.36	126	57	40
5943.3	135	58	48
5953.24	123	75	39
5963.16	129	64	48
5973.1	123	55	36
5983.04	141	64	44
5992.98	129	58	58
6002.93	133	60	33
6012.87	126	64	45
6022.81	137	78	50
6032.75	134	63	39
6042.7	120	67	39
6052.64	129	63	41
6062.57	124	71	30
6072.51	127	60	53
6082.43	127	71	50
6092.36	137	79	47
6102.29	124	61	32
6112.22	125	59	40
6122.15	124	59	49
6132.09	131	66	33
6142.02	127	64	47
6151.94	127	67	35
6161.89	124	55	49
6171.83	127	62	49
6181.78	130	61	43
6191.71	128	61	43
6201.66	123	68	51
6211.61	128	67	45
6221.56	124	60	46
6231.51	124	62	37
6241.44	127	60	48
6251.38	121	64	41
6261.32	133	67	52
6271.24	116	65	55
6281.17	120	55	29
6291.12	125	74	45
6301.06	123	59	41
6311	127	52	50
6320.94	123	64	39
6330.87	123	64	48
6340.81	129	58	42
6350.75	127	71	43
6360.69	124	57	48
6370.63	124	60	43
6380.57	126	68	39
6390.51	124	68	38
6400.43	124	68	42
6410.36	115	60	34
6420.31	125	64	44
6430.25	120	68	45
6440.19	127	67	43
6450.11	122	54	39
6460.05	122	59	57
6469.98	130	70	44
6479.91	127	62	37
6489.85	119	56	51
6499.79	116	66	38
6509.73	121	59	36
6519.66	118	63	47
6529.61	119	71	44
6539.54	118	67	39
6549.49	125	61	45
6559.43	119	69	43
6569.37	127	65	40
6579.31	118	67	41
6589.24	133	58	44
6599.19	117	52	35
6609.12	118	56	44
6619.06	123	66	51
6629.01	113	59	41
6638.96	119	62	41
6648.9	125	58	39
6658.84	119	67	38
6668.8	122	64	46
6678.74	118	56	37
6688.68	128	65	54
6698.62	114	64	48
6708.56	120	60	47
6718.48	121	56	50
6728.41	115	59	41
6738.34	123	65	47
6748.27	125	53	38
6758.21	116	60	50
6768.14	116	62	45
6778.07	122	59	48
6788	121	54	46
6797.94	113	58	52
6807.88	120	55	32
6817.82	117	63	50
6827.76	119	65	49
6837.7	119	58	38
6847.64	125	64	39
6857.59	123	67	47
6867.53	118	70	44
6877.49	123	59	37
6887.44	123	52	38
6897.38	114	66	46
6907.32	124	63	44
6917.26	119	58	44
6927.19	120	53	32
6937.12	113	61	38
6947.07	121	55	37
6957	121	62	33
6966.94	118	57	48
6976.87	120	57	32
6986.81	113	63	37
6996.75	119	70	49
7006.7	124	77	40
7016.64	119	56	50
7026.57	124	59	42
7036.51	116	70	38
7046.44	114	65	37
7056.37	112	67	44
7066.31	110	55	38
7076.25	117	47	36
7086.19	120	64	40
7096.13	119	61	44
7106.06	116	51	47
7115.99	113	72	44
7125.94	125	54	44
7135.87	117	64	45
7145.81	114	66	42
7155.74	109	65	39
7165.68	111	54	40
7175.61	123	56	45
7185.55	118	64	37
7195.49	113	61	48
7205.43	109	60	45
7215.37	115	46	52
7225.33	120	61	40
7235.25	110	64	35
7245.17	114	50	43
7255.11	118	61	38
7265.05	114	61	44
7274.99	119	56	42
7284.94	114	60	41
7294.9	115	68	44
7304.84	110	55	37
7314.79	116	58	39
7324.73	111	60	37
7334.66	107	61	38
7344.6	120	71	44
7354.52	112	56	45
7364.45	125	65	40
7374.39	119	69	45
7384.32	115	66	45
7394.25	115	60	31
7404.19	110	59	36
7414.12	121	73	41
7424.05	119	67	45
7434	110	65	38
7443.93	119	64	36
7453.87	117	69	42
7463.81	116	56	38
7473.75	116	53	49
7483.69	123	60	51
7493.62	112	65	47
7503.58	126	56	51
7513.52	131	55	42
7523.46	117	55	42
7533.4	115	67	52
7543.35	125	55	47
7553.28	114	61	42
7563.23	109	54	42
7573.17	110	60	48
7583.1	109	55	49
7593.05	118	57	45
7602.98	125	57	43
7612.92	111	52	38
7622.85	110	58	45
7632.8	107	57	47
7642.73	115	44	32
7652.67	110	63	50
7662.6	122	68	43
7672.54	110	55	32
7682.47	103	41	41
7692.41	111	63	36
7702.33	103	61	46
7712.26	113	71	39
7722.19	105	55	48
7732.13	105	71	28
7742.07	110	58	43
7752.01	111	55	44
7761.96	113	57	45
7771.89	111	66	47
7781.83	104	68	48
7791.76	115	57	45
7801.71	112	63	41
7811.64	105	57	38
7821.59	104	60	54
7831.52	106	64	48
7841.46	117	60	47
7851.4	110	60	47
7861.33	97	54	49
7871.27	105	54	40
7881.2	107	56	33
7891.15	98	57	40
7901.09	116	65	39
7911.04	112	58	49
7920.98	104	69	48
7930.92	107	60	50
7940.88	112	62	37
7950.82	112	47	37
7960.76	108	55	49
7970.7	115	64	34
7980.63	109	55	44
7990.57	113	63	38
8000.49	105	62	43
8010.42	108	63	50
8020.35	107	58	36
8030.28	108	52	42
8040.2	114	58	41
8050.14	102	63	47
8060.07	104	50	43
8070.01	99	58	55
8079.95	102	70	50
8089.88	111	56	45
8099.82	114	69	45
8109.76	109	70	39
8119.7	113	54	49
8129.65	99	58	55
8139.59	109	53	53
8149.53	103	59	35
8159.47	111	64	33
8169.41	103	53	51
8179.35	113	60	38
8189.29	105	50	45
8199.23	107	56	35
8209.17	100	51	43
8219.1	107	73	48
8229.03	104	70	45
8238.97	100	66	38
8248.91	104	59	43
8258.86	107	56	38
8268.8	100	61	45
8278.74	95	54	37
8288.66	106	70	25
8298.59	117	59	40
8308.52	99	62	47
8318.45	110	59	56
8328.38	99	56	38
8338.33	112	63	42
8348.26	99	65	43
8358.2	107	53	38
8368.13	108	69	49
8378.09	100	58	52
8388.04	98	60	37
8397.98	104	62	44
8407.92	90	53	44
8417.86	105	63	41
8427.8	106	61	49
8437.73	111	53	48
8447.67	98	65	41
8457.6	108	54	53
8467.54	93	61	42
8477.48	96	58	39
8487.42	98	47	36
8497.36	102	65	45
8507.3	101	46	41
8517.25	105	60	41
8527.19	107	58	49
8537.13	103	63	30
8547.07	100	51	49
8557.01	101	54	38
8566.95	106	53	44
8576.88	95	66	45
8586.84	115	58	50
8596.78	114	54	39
8606.72	104	61	33
8616.65	99	48	53
8626.58	93	65	42
8636.52	98	60	38
8646.45	100	61	46
8656.38	100	46	36
8666.31	103	50	48
8676.24	105	55	50
8686.17	95	49	41
8696.11	96	57	37
8706.04	103	68	44
8715.98	106	60	41
8725.92	102	65	50
8735.85	98	51	41
8745.79	101	63	46
8755.73	102	52	42
8765.68	93	49	49
8775.63	96	57	33
8785.56	102	54	47
8795.51	97	42	41
8805.45	98	52	47
8815.4	97	58	46
8825.33	100	62	51
8835.27	107	69	35
8845.22	96	58	42
8855.15	105	56	35
8865.09	111	55	39
8875.02	97	55	41
8884.95	112	49	35
8894.89	98	54	40
8904.84	95	56	44
8914.78	97	41	54
8924.71	99	52	40
8934.64	100	58	46
8944.57	112	62	64
8954.5	99	56	50
8964.43	97	60	43
8974.36	90	56	33
8984.3	110	49	51
8994.23	90	54	54
9004.17	98	56	47
9014.1	94	57	36
9024.05	87	65	34
9033.99	93	49	44
9043.94	84	70	33
9053.89	95	55	53
9063.82	99	60	52
9073.74	106	52	38
9083.66	97	48	43
9093.68	100	60	45
9103.62	108	42	54
9113.56	102	67	38
9123.5	94	60	37
9133.43	96	57	50
9143.37	94	46	40
9153.32	100	59	43
9163.27	91	56	44
9173.2	108	66	41
9183.15	97	63	44
9193.08	96	51	35
9203.03	96	55	47
9212.97	94	60	35
9222.91	93	59	46
9232.84	103	67	52
9242.79	93	61	34
9252.73	101	50	30
9262.66	102	58	38
9272.59	96	56	39
9282.52	99	42	45
9292.45	91	55	38
9302.38	103	61	44
9312.3	95	60	49
9322.23	108	50	36
9332.17	98	44	47
9342.12	103	63	41
9352.06	93	51	49
9361.99	89	53	50
9371.93	107	44	47
9381.86	101	56	44
9391.81	102	61	43
9401.74	100	62	49
9411.68	90	58	37
9421.63	101	54	41
9431.56	97	69	46
9441.5	95	57	46
9451.44	84	66	42
9461.4	103	41	50
9471.35	95	46	47
9481.29	88	52	41
9491.23	92	46	56
9501.17	89	59	42
9511.1	87	63	33
9521.03	92	53	36
9530.97	99	52	32
9540.9	93	55	53
9550.84	86	64	51
9560.77	99	52	43
9570.7	105	58	54
9580.62	84	56	35
9590.56	89	47	43
9600.49	97	58	48
9610.42	94	62	40
9620.35	95	57	31
9630.29	91	45	41
9640.22	101	51	46
9650.16	100	52	42
9660.1	91	57	40
9670.05	96	51	42
9680	89	51	38
9689.94	106	64	40
9699.88	93	53	37
9709.82	90	51	52
9719.76	85	46	37
9729.7	94	55	53
9739.64	91	50	43
9749.57	102	59	45
9759.51	95	68	43
9769.45	90	45	48
9779.39	92	58	45
9789.33	87	41	29
9799.26	86	53	33
9809.21	88	61	47
9819.14	98	57	36
9829.08	96	60	56
9839.01	94	59	44
9848.95	96	45	42
9858.88	88	36	51
9868.81	93	64	59
9878.74	89	62	50
9888.68	89	54	36
9898.61	99	57	35
9908.56	103	59	34
9918.49	94	49	27
9928.43	99	62	39
9938.35	87	49	52
9948.29	90	56	49
9958.22	89	51	44
9968.15	103	63	58
9978.08	82	53	31
9988.03	84	47	40
9997.96	89	57	37
10007.9	80	58	36
10017.8	90	59	32
10027.8	88	64	27
10037.7	93	60	45
10047.7	83	56	43
10057.6	97	48	30
10067.5	80	69	56
10077.5	92	61	43
10087.4	95	48	43
10097.4	90	56	39
10107.3	90	53	29
10117.2	88	54	43
10127.2	87	48	40
10137.1	93	58	47
10147	86	55	31
10157	91	41	30
10166.9	99	55	30
10176.9	95	54	45
10186.8	90	53	31
10196.7	102	63	42
10206.6	97	53	43
10216.6	101	48	39
10226.5	105	53	30
10236.4	94	68	47
10246.4	87	58	45
10256.3	91	47	50
10266.2	94	55	40
10276.2	99	65	37
10286.1	93	44	37
10296.1	93	56	47
10306	91	60	39
10315.9	89	48	39
10325.9	89	46	37
10335.8	86	63	40
10345.8	96	51	35
10355.7	87	48	43
10365.7	90	47	47
10375.6	97	54	49
10385.5	83	62	35
10395.5	91	58	56
10405.4	84	63	40
10415.3	109	52	45
10425.3	80	49	39
10435.2	95	59	42
10445.2	84	52	44
10455.1	86	56	47
10465	99	63	42
10475	91	52	40
10484.9	89	51	34
10494.8	89	47	47
10504.8	79	57	43
10514.7	92	63	33
10524.6	98	56	40
10534.6	81	52	32
10544.5	79	54	51
10554.5	85	60	35
10564.4	91	59	43
10574.3	82	51	37
10584.3	89	48	37
10594.2	85	49	38
10604.1	90	57	42
10614.1	87	48	24
10624	86	54	41
10634	88	59	52
10643.9	84	62	45
10653.8	97	55	32
10663.8	91	58	45
10673.7	92	68	46
10683.6	88	57	42
10693.6	80	65	46
10703.5	91	45	37
10713.5	75	58	51
10723.4	77	61	42
10733.4	89	55	32
10743.3	93	53	50
10753.2	89	55	34
10763.2	78	43	51
10773.1	85	51	49
10783.1	88	53	49
10793	98	64	47
10802.9	91	54	44
10812.9	94	55	29
10822.8	93	58	53
10832.7	84	54	48
10842.7	98	57	42
10852.6	91	52	45
10862.5	72	46	52
10872.5	88	56	35
10882.4	85	53	38
10892.3	102	46	44
10902.3	91	49	40
10912.2	79	60	42
10922.1	88	51	34
10932	86	49	37
10942	87	60	36
10951.9	89	46	52
10961.9	87	47	42
10971.8	105	53	33
10981.7	88	53	39
10991.7	90	50	55
11001.6	91	49	38
11011.6	80	55	43
11021.5	97	48	40
11031.4	90	49	47
11041.4	87	57	40
11051.3	76	63	48
11061.3	86	61	41
11071.2	91	50	41
11081.1	88	57	47
11091.1	97	64	45
11101	84	58	56
11110.9	88	51	45
11120.9	82	47	44
11130.8	94	63	46
11140.7	79	62	35
11150.7	84	63	42
11160.6	80	58	28
11170.6	86	53	41
11180.5	80	65	54
11190.4	90	62	39
11200.4	93	51	43
11210.3	92	53	34
11220.2	86	49	33
11230.2	77	46	46
11240.1	83	56	33
11250	73	58	42
11260	97	59	44
11269.9	83	47	47
11279.9	81	53	42
11289.8	89	52	45
11299.7	95	50	52
11309.7	84	52	35
11319.6	80	64	37
11329.6	88	55	45
11339.5	86	45	42
11349.4	86	50	30
11359.4	84	48	44
11369.3	88	55	41
11379.3	74	48	31
11389.2	75	47	47
11399.2	82	54	38
11409.1	89	48	52
11419	70	52	40
11429	90	56	37
11438.9	78	47	42
11448.8	81	53	42
11458.8	83	64	51
11468.7	79	58	29
11478.6	99	56	42
11488.5	75	56	43
11498.5	87	65	55
11508.4	77	54	32
11518.3	82	66	35
11528.3	75	40	39
11538.2	85	33	43
11548.2	83	58	42
11558.1	85	46	36
11568	80	46	48
11578	85	56	45
11587.9	85	52	43
11597.9	79	68	36
11607.8	81	49	36
11617.8	89	56	53
11627.7	86	49	50
11637.6	101	65	46
11647.6	91	57	36
11657.5	90	59	38
11667.4	85	53	31
11677.4	87	41	40
11687.3	83	47	37
11697.2	73	45	36
11707.2	77	67	44
11717.1	83	50	40
11727.1	93	56	32
11737	82	49	37
11746.9	84	53	43
11756.9	83	53	35
11766.8	88	58	41
11776.7	67	52	21
11786.6	84	49	39
11796.6	87	47	50
11806.5	95	51	39
11816.5	75	43	49
11826.4	85	55	49
11836.4	75	53	46
11846.3	78	56	40
11856.2	92	51	28
11866.2	83	53	37
11876.1	80	49	47
11886.1	80	55	37
11896	79	58	37
11905.9	79	56	43
11915.9	73	44	31
11925.8	94	48	34
11935.7	87	47	36
11945.7	81	50	42
11955.6	77	57	53
11965.6	84	56	64
11975.5	82	47	45
11985.4	79	51	41
11995.4	95	66	48
12005.3	89	56	41
12015.3	80	45	45
12025.2	88	54	53
12035.2	88	47	36
12045.1	80	59	40
12055	79	59	42
12065	90	51	55
12074.9	82	53	35
12084.8	78	66	41
12094.7	77	55	46
12104.7	76	53	53
12114.6	74	54	28
12124.5	92	51	20
12134.5	81	58	34
12144.4	94	54	47
12154.4	80	47	46
12164.3	72	33	41
12174.2	85	59	37
12184.2	90	58	52
12194.1	80	59	42
12204.1	74	48	45
12214	77	47	24
12224	75	46	36
12233.9	83	52	49
12243.8	86	52	43
12253.8	80	51	40
12263.7	68	50	43
12273.7	92	49	36
12283.6	82	54	39
12293.5	84	52	38
12303.5	87	50	33
12313.4	89	64	43
12323.3	78	44	50
12333.3	82	52	38
12343.2	80	55	41
12353.2	82	51	38
12363.1	83	52	33
12373	76	44	44
12383	78	48	33
12392.9	94	44	46
12402.8	80	59	51
12412.8	92	43	35
12422.7	91	59	18
12432.6	81	50	38
12442.6	83	51	35
12452.5	75	56	48
12462.5	98	57	36
12472.4	73	55	43
12482.3	82	53	40
12492.3	85	49	41
12502.2	80	55	43
12512.2	81	56	39
12522.1	80	58	46
12532	77	64	33
12542	73	53	48
12551.9	88	60	35
12561.8	76	63	33
12571.8	81	58	29
12581.7	94	59	42
12591.7	79	54	44
12601.6	84	61	46
12611.5	77	49	50
12621.5	71	61	33
12631.4	88	51	52
12641.4	83	44	35
12651.3	84	44	43
12661.2	72	54	49
12671.2	78	57	40
12681.1	88	59	48
12691.1	75	54	24
12701	76	61	49
12710.9	91	50	36
12720.9	79	57	32
12730.8	80	58	34
12740.7	78	51	40
12750.6	74	43	43
12760.6	85	55	45
12770.5	78	62	53
12780.4	74	66	44
12790.3	82	48	33
12800.3	70	50	33
12810.2	82	52	42
12820.1	73	58	46
12830.1	84	50	38
12840	84	61	40
12849.9	77	49	28
12859.9	71	54	44
12869.8	93	63	38
12879.8	78	46	51
12889.7	88	41	42
12899.7	85	52	35
12909.6	77	46	28
12919.5	77	55	45
12929.5	85	48	33
12939.4	79	59	53
12949.4	86	49	38
12959.3	87	59	47
12969.2	81	62	46
12979.2	77	55	42
12989.1	75	52	40
12999	61	50	40
13008.9	81	53	48
13018.9	77	51	46
13028.8	81	51	33
13038.7	70	47	39
13048.7	79	48	32
13058.6	74	44	29
13068.6	71	43	34
13078.5	81	49	35
13088.4	76	51	41
13098.4	69	57	44
13108.3	85	59	33
13118.3	82	42	38
13128.2	80	55	43
13138.2	79	66	34
13148.1	90	54	47
13158	75	53	44
13168	71	56	30
13177.9	83	47	28
13187.8	92	47	45
13197.8	86	59	36
13207.7	78	50	43
13217.7	76	52	29
13227.6	74	55	55
13237.5	82	52	51
13247.5	81	41	32
13257.4	85	49	57
13267.4	78	55	47
13277.3	88	59	44
13287.2	69	45	37
13297.2	72	34	50
13307.1	72	53	42
13317	69	61	42
13327	78	46	50
13336.9	76	59	45
13346.9	78	54	57
13356.8	68	45	49
13366.7	88	55	44
13376.6	80	57	51
13386.6	78	46	47
13396.5	83	38	34
13406.4	70	49	39
13416.4	68	42	36
13426.3	80	47	52
13436.3	71	48	36
13446.2	79	48	39
13456.1	73	49	40
13466.1	78	54	45
13476	84	55	41
13486	68	47	41
13495.9	88	44	37
13505.8	71	60	38
13515.8	81	35	34
13525.7	71	53	45
13535.7	81	44	31
13545.6	83	63	43
13555.6	65	53	43
13565.5	74	56	43
13575.4	70	49	30
13585.4	90	49	52
13595.3	74	59	44
13605.3	68	52	38
13615.2	83	54	45
13625.1	76	74	42
13635.1	74	53	47
13645	75	53	41
13654.9	82	46	40
13664.9	84	54	36
13674.8	77	43	40
13684.7	73	62	32
13694.7	83	50	26
13704.6	82	55	39
13714.5	81	46	55
13724.5	63	53	27
13734.4	79	58	46
13744.4	77	38	47
13754.3	64	59	47
13764.3	78	54	43
13774.2	77	48	37
13784.2	80	48	38
13794.1	87	49	41
13804	76	64	38
13814	76	55	38
13823.9	65	62	41
13833.8	80	49	49
13843.8	75	65	43
13853.7	78	44	44
13863.7	77	56	49
13873.6	71	55	43
13883.5	78	49	27
13893.5	79	45	39
13903.4	76	61	40
13913.3	87	53	40
13923.3	75	50	36
13933.2	76	55	35
13943.2	70	46	35
13953.1	83	51	38
13963	70	44	32
13973	84	48	45
13982.9	76	46	33
13992.8	71	61	33
14002.8	69	47	36
14012.7	75	41	42
14022.6	74	41	34
14032.6	78	62	35
14042.5	73	57	39
14052.4	79	37	35
14062.4	84	57	35
14072.3	80	54	43
14082.2	82	59	31
14092.2	83	44	30
14102.1	69	60	35
14112.1	65	46	45
14122	83	42	45
14131.9	69	54	43
14141.9	71	47	45
14151.8	75	46	30
14161.8	87	67	47
14171.7	80	47	29
14181.7	79	62	32
14191.6	73	55	38
14201.6	74	55	40
14211.5	82	40	47
14221.4	82	57	26
14231.4	69	53	37
14241.3	85	47	45
14251.2	66	51	48
14261.2	70	51	28
14271.1	70	58	43
14281	81	46	40
14291	72	52	41
14300.9	68	57	37
14310.8	72	60	47
14320.8	67	43	53
14330.7	72	57	39
14340.6	74	53	45
14350.6	78	47	42
14360.5	74	54	31
14370.5	77	39	30
14380.4	73	49	37
14390.3	73	45	42
14400.3	78	53	44
14410.2	77	36	38
14420.2	64	43	36
14430.1	83	57	44
14440	71	47	24
14450	77	50	51
14459.9	72	53	58
14469.8	91	54	45
14479.8	84	54	46
14489.7	70	48	35
14499.7	75	59	47
14509.6	73	42	39
14519.5	81	46	39
14529.5	69	58	35
14539.4	71	59	42
14549.4	76	48	38
14559.3	69	51	35
14569.2	73	44	41
14579.2	73	44	41
14589.1	85	53	34
14599	67	55	39
14609	75	46	38
14618.9	65	64	41
14628.8	71	52	33
14638.7	83	56	43
14648.7	65	57	41
14658.6	75	48	44
14668.5	70	46	36
14678.4	77	47	37
14688.4	70	43	46
14698.3	77	57	44
14708.2	64	55	45
14718.2	64	49	41
14728.1	61	56	46
14738.1	76	57	49
14748	69	50	29
14757.9	72	61	49
14767.9	74	48	40
14777.8	75	46	43
14787.8	80	47	38
14797.7	74	60	39
14807.6	65	49	34
14817.6	61	59	30
14827.5	72	48	47
14837.5	69	47	47
14847.4	81	44	36
14857.4	73	53	41
14867.3	72	46	39
14877.2	71	37	42
14887.2	66	38	41
14897.1	77	53	38
14907	68	63	45
14917	67	61	37
14926.9	76	51	38
14936.8	72	56	37
14946.7	75	54	43
14956.7	75	48	42
14966.6	69	49	38
14976.6	75	56	31
14986.5	65	56	46
14996.5	70	55	51
15006.4	76	48	50
15016.3	62	48	45
15026.3	72	58	42
15036.2	76	52	37
15046.2	76	62	46
15056.1	65	50	29
15066.1	77	52	47
15076	76	57	44
15085.9	71	57	42
15095.9	61	26	37
15105.8	72	58	40
15115.7	69	41	36
15125.7	71	53	37
15135.6	72	48	36
15145.5	64	62	36
15155.5	76	62	45
15165.4	69	55	38
15175.4	76	54	42
15185.3	69	53	36
15195.2	71	54	39
15205.2	71	54	44
15215.1	81	56	45
15225	73	43	39
15235	71	55	28
15244.9	63	42	43
15254.8	78	48	30
15264.8	67	51	32
15274.7	74	57	48
15284.7	66	56	47
15294.6	64	50	37
15304.5	68	54	35
15314.5	63	58	35
15324.4	68	52	38
15334.4	78	49	45
15344.3	75	50	42
15354.2	74	53	47
15364.2	68	54	44
15374.1	74	50	40
15384	69	42	41
15394	69	48	33
15403.9	57	51	38
15413.9	77	53	42
15423.8	76	52	49
15433.8	81	54	43
15443.7	78	52	44
15453.6	74	59	49
15463.6	65	49	39
15473.5	60	56	54
15483.5	73	54	39
15493.4	69	58	40
15503.3	65	58	45
15513.3	54	53	38
15523.2	73	48	40
15533.1	72	48	47
15543.1	60	65	43
15553	52	48	39
15562.9	73	51	30
15572.9	71	42	42
15582.8	71	55	48
15592.7	79	50	43
15602.7	70	52	45
15612.6	71	43	33
15622.5	74	48	42
15632.5	79	56	46
15642.4	63	59	43
15652.3	62	52	26
15662.3	71	48	39
15672.2	65	52	37
15682.2	71	44	53
15692.1	61	59	48
15702.1	63	46	45
15712	57	58	43
15721.9	80	47	41
15731.9	76	48	34
15741.8	68	53	34
15751.7	63	57	35
15761.7	69	55	51
15771.6	63	53	36
15781.6	67	50	40
15791.5	72	45	24
15801.4	78	54	42
15811.4	73	48	31
15821.3	71	54	40
15831.2	75	49	35
15841.2	65	53	47
15851.1	71	51	48
15861	64	51	29
15871	81	52	49
15880.9	69	51	35
15890.8	71	51	41
15900.8	69	52	50
15910.7	75	54	31
15920.7	75	48	32
15930.6	59	51	52
15940.6	71	53	35
15950.5	69	60	41
15960.4	66	53	37
15970.4	71	44	33
15980.3	69	55	36
15990.3	71	47	45
16000.2	56	50	41
16010.1	72	34	30
16020.1	65	48	40
16030	69	47	41
16040	67	53	30
16049.9	68	59	38
16059.8	60	46	43
16069.7	75	53	38
16079.7	59	47	32
16089.6	71	50	35
16099.5	72	46	37
16109.4	62	44	36
16119.4	72	50	47
16129.3	59	60	44
16139.2	66	46	40
16149.2	66	57	43
16159.1	65	47	35
16169	66	52	33
16179	70	45	30
16188.9	69	42	33
16198.8	70	48	40
16208.8	71	52	39
16218.7	77	45	41
16228.6	65	52	46
16238.6	73	53	34
16248.5	78	53	36
16258.5	67	49	38
16268.4	70	47	37
16278.4	69	46	44
16288.3	66	52	46
16298.2	60	50	45
16308.2	69	64	44
16318.1	78	48	46
16328.1	71	53	31
16338	77	46	35
16348	61	55	35
16357.9	74	48	36
16367.8	69	61	43
16377.8	71	49	35
16387.7	74	57	41
16397.6	74	62	44
16407.6	68	56	31
16417.5	76	55	39
16427.5	69	48	32
16437.4	76	54	42
16447.3	63	62	50
16457.3	64	59	33
16467.2	73	51	41
16477.1	76	53	33
16487.1	66	44	50
16497	65	43	36
16506.9	64	64	40
16516.8	78	51	43
16526.8	66	56	20
16536.7	69	56	33
16546.6	58	43	43
16556.6	61	54	44
16566.5	70	46	35
16576.4	59	50	45
16586.3	64	57	49
16596.3	72	57	33
16606.3	63	49	40
16616.2	68	50	39
16626.1	81	54	49
16636	61	36	30
16646	70	54	44
16655.9	75	53	44
16665.8	65	53	41
16675.8	70	48	23
16685.7	74	50	38
16695.7	62	55	43
16705.6	72	54	56
16715.5	71	45	39
16725.5	70	53	42
16735.4	68	58	42
16745.3	70	46	35
16755.3	75	43	50
16765.2	73	48	35
16775.1	69	61	46
16785.1	53	46	40
16795	61	59	43
16804.9	68	52	47
16814.9	70	57	46
16824.8	63	52	31
16834.7	60	59	50
16844.7	68	40	40
16854.6	66	58	37
16864.6	64	51	43
16874.5	57	47	43
16884.5	74	46	38
16894.4	61	61	42
16904.3	64	51	46
16914.3	65	52	39
16924.2	67	47	34
16934.2	69	43	35
16944.1	61	44	37
16954	56	53	37
16964	66	49	44
16973.9	65	48	27
16983.9	71	54	42
16993.8	72	42	37
17003.8	65	55	40
17013.7	65	46	45
17023.6	60	48	40
17033.6	65	52	41
17043.5	69	42	33
17053.4	62	54	34
17063.4	58	47	28
17073.3	72	63	38
17083.2	68	48	40
17093.2	60	49	33
17103.1	62	55	43
17113	60	46	29
17123	59	52	41
17132.9	64	53	22
17142.8	68	49	35
17152.8	65	48	38
17162.7	45	47	44
17172.7	64	51	30
17182.6	62	57	32
17192.6	63	48	44
17202.5	60	48	41
17212.4	68	48	35
17222.4	83	44	33
17232.3	67	55	44
17242.3	64	52	35
17252.2	64	55	49
17262.1	66	52	35
17272.1	64	45	41
17282	58	46	33
17292	73	44	42
17301.9	68	60	45
17311.8	61	46	42
17321.8	73	49	40
17331.7	59	49	30
17341.6	62	54	35
17351.6	60	43	34
17361.5	70	58	47
17371.4	78	58	38
17381.4	62	47	46
17391.3	81	48	36
17401.2	65	45	35
17411.2	63	46	40
17421.1	59	56	44
17431.1	67	44	36
17441	57	54	43
17450.9	63	53	42
17460.8	70	44	43
17470.8	72	54	39
17480.7	74	43	44
17490.7	67	45	38
17500.6	69	59	27
17510.6	63	52	40
17520.5	68	49	44
17530.4	69	50	37
17540.4	65	42	44
17550.3	75	51	38
17560.3	66	62	35
17570.2	60	52	41
17580.1	73	51	36
17590.1	79	47	38
17600	74	57	46
17610	76	58	41
17619.9	63	54	53
17629.9	67	57	41
17639.8	51	54	33
17649.7	61	47	30
17659.7	71	41	43
17669.6	62	50	48
17679.5	67	36	38
17689.5	70	41	57
17699.4	65	42	40
17709.3	82	49	47
17719.3	72	43	58
17729.2	66	48	41
17739.1	59	52	36
17749.1	67	45	38
17759	71	44	37
17768.9	63	56	30
17778.9	62	52	32
17788.8	74	56	49
17798.8	66	47	27
17808.7	72	54	40
17818.7	73	55	50
17828.6	59	60	36
17838.5	69	55	47
17848.5	67	52	43
17858.4	60	52	40
17868.4	66	42	43
17878.3	68	46	41
17888.2	59	42	35
17898.2	55	46	31
17908.1	51	51	34
17918	61	45	35
17928	66	41	42
17937.9	61	50	40
17947.9	61	51	39
17957.8	55	44	28
17967.7	71	48	39
17977.7	65	49	44
17987.6	59	46	51
17997.6	64	60	38
18007.5	54	60	35
18017.4	73	53	34
18027.3	59	40	36
18037.3	60	51	36
18047.2	57	53	44
18057.2	61	50	37
18067.1	68	47	41
18077	62	46	22
18087	71	50	45
18096.9	61	39	43
18106.8	73	50	46
18116.8	66	48	47
18126.7	72	51	44
18136.6	66	59	50
18146.6	68	52	44
18156.5	70	47	36
18166.5	60	49	42
18176.4	68	57	27
18186.3	67	47	38
18196.3	68	47	30
18206.2	59	58	40
18216.2	68	53	44
18226.1	48	43	33
18236	69	55	32
18246	75	51	29
18255.9	60	57	45
18265.9	68	48	42
18275.8	70	56	30
18285.8	69	39	41
18295.7	50	53	47
18305.6	63	60	35
18315.5	70	51	36
18325.5	64	53	34
18335.4	68	49	44
18345.3	61	49	44
18355.3	63	44	46
18365.2	68	43	29
18375.1	67	48	36
18385.1	59	48	48
18395	69	43	40
18405	68	52	38
18414.9	68	52	38
18424.8	50	47	43
18434.7	59	47	43
18444.7	57	51	41
18454.6	68	56	47
18464.5	63	48	42
18474.4	57	58	53
18484.4	70	42	35
18494.3	71	47	45
18504.2	73	48	33
18514.1	73	49	35
18524.1	75	47	37
18534	57	60	44
18543.9	62	48	38
18553.9	76	45	40
18563.8	60	57	40
18573.7	69	50	41
18583.7	58	48	46
18593.6	53	48	39
18603.5	66	52	43
18613.5	69	47	37
18623.4	70	41	48
18633.3	78	56	33
18643.3	63	56	40
18653.2	61	53	43
18663.1	60	46	39
18673.1	59	59	40
18683	72	54	44
18693	62	45	36
18702.9	64	48	40
18712.9	70	60	44
18722.8	59	52	31
18732.7	59	48	45
18742.7	69	52	43
18752.6	65	42	36
18762.6	59	36	32
18772.5	59	47	31
18782.4	62	52	39
18792.4	62	52	36
18802.3	66	53	48
18812.3	61	53	32
18822.2	67	43	31
18832.1	51	51	41
18842.1	62	59	44
18852	63	59	41
18862	64	53	41
18871.9	62	43	45
18881.8	68	45	37
18891.8	61	43	30
18901.7	64	43	39
18911.7	54	52	35
18921.6	71	53	41
18931.5	78	42	43
18941.5	62	49	32
18951.4	69	54	37
18961.3	63	50	40
18971.3	67	49	38
18981.2	61	41	33
18991.1	64	49	29
19001.1	74	44	38
19011	63	54	33
19020.9	59	55	48
19030.9	76	48	39
19040.8	67	56	46
19050.8	63	44	37
19060.7	58	49	52
19070.7	59	37	38
19080.6	73	45	32
19090.5	66	55	39
19100.5	63	49	35
19110.4	60	36	39
19120.4	66	56	22
19130.3	55	50	38
19140.2	66	46	36
19150.2	55	56	36
19160.1	66	38	35
19170	56	56	34
19180	67	50	43
19189.9	67	35	42
19199.9	57	41	48
19209.8	52	46	32
19219.7	63	40	36
19229.7	65	52	37
19239.6	69	51	34
19249.5	58	45	38
19259.4	54	57	34
19269.4	60	52	38
19279.3	63	43	43
19289.2	54	49	41
19299.2	75	43	41
19309.1	59	45	53
19319.1	57	51	36
19329	65	66	42
19339	76	50	39
19348.9	70	50	40
19358.9	64	43	49
19368.8	57	54	35
19378.7	62	45	39
19388.7	63	53	44
19398.6	57	51	42
19408.5	69	53	37
19418.5	66	52	28
19428.4	63	47	45
19438.3	55	41	52
19448.3	60	49	26
19458.2	63	43	43
19468.2	63	45	38
19478.1	64	54	34
19488	77	53	45
19498	61	47	38
19507.9	55	56	40
19517.9	60	52	42
19527.8	69	53	30
19537.7	65	51	43
19547.7	59	42	43
19557.6	50	52	30
19567.5	54	43	50
19577.5	63	51	31
19587.4	66	42	31
19597.3	60	49	44
19607.3	67	46	42
19617.2	55	45	32
19627.1	59	46	34
19637.1	64	51	39
19647	74	55	33
19656.9	61	50	25
19666.9	68	52	28
19676.8	72	52	30
19686.8	66	47	41
19696.7	81	55	34
19706.7	59	53	32
19716.6	53	52	27
19726.5	71	49	46
19736.5	64	53	34
19746.4	51	42	40
19756.4	65	52	32
19766.3	56	48	45
19776.2	63	58	42
19786.2	60	43	48
19796.1	66	41	37
19806.1	53	49	27
19816	52	42	28
19825.9	73	43	25
19835.9	56	55	32
19845.8	63	52	39
[truncated: 2,288 more rows]
