# Supplementary material for: ARL3 activation requires the co-GEF BART and effector-mediated turnover
Source: eLife. 2021 Jan 13;10:e64624. doi: 10.7554/eLife.64624 (PMC7817177; doi:10.7554/eLife.64624)
Supplement: Figure 4—source data 1. [file elife-64624-fig4-data1.xlsx]

## Sheet: multiple turnover GDP GppNHp
time (s)	GppNHp	GDP
0	261	253
5.806	258	254
11.627	258	259
17.453	261	250
23.285	255	254
29.104	259	249
34.923	252	253
40.736	254	255
46.552	253	251
52.377	251	249
58.189	251	255
63.996	253	255
69.82	249	249
75.64	250	249
81.453	256	248
87.269	255	247
93.086	254	247
98.904	247	248
104.718	250	254
110.534	246	250
116.339	250	254
122.147	255	251
127.96	250	237
133.774	251	246
139.589	248	243
145.405	252	244
151.235	248	239
157.06	246	246
162.866	249	245
168.685	247	240
174.494	249	242
180.31	245	240
186.121	247	236
191.939	246	235
197.758	247	236
203.573	243	238
209.387	243	234
215.205	248	240
221.011	244	238
226.826	249	238
232.646	244	235
238.453	244	234
244.264	242	230
250.087	234	228
255.907	248	234
261.732	241	236
267.548	237	237
273.361	244	227
279.173	244	228
284.989	245	224
290.82	246	233
296.66	239	230
302.475	248	229
308.285	246	227
314.099	240	231
319.923	246	225
325.738	246	232
331.564	243	230
337.373	246	228
343.181	241	230
348.996	249	229
354.812	243	224
360.616	245	224
366.431	242	224
372.249	244	220
378.06	238	226
383.881	246	223
389.699	241	222
395.512	241	224
401.324	240	223
407.131	245	224
412.94	239	223
418.754	234	221
424.57	245	224
430.397	238	225
436.205	244	225
442.027	243	219
447.846	244	213
453.669	240	219
459.482	243	217
465.298	242	214
471.101	242	219
476.924	241	217
482.742	242	222
488.556	244	216
494.376	246	218
500.189	238	216
506.005	242	210
511.826	237	215
517.648	239	219
523.462	236	209
529.278	248	214
535.091	247	217
540.903	243	210
546.708	242	212
552.52	245	214
558.333	240	214
564.143	245	214
569.951	236	221
575.76	239	207
581.584	241	216
587.399	242	212
593.218	242	211
599.034	241	211
604.853	240	215
610.667	241	209
616.472	240	209
622.279	237	208
628.085	236	206
633.891	240	210
639.704	240	210
645.522	244	216
651.349	237	209
657.165	240	203
662.984	241	206
668.801	243	205
674.609	239	206
680.406	243	211
686.217	239	208
692.023	239	203
697.829	235	203
703.654	238	211
709.462	240	202
715.288	242	209
721.115	241	205
726.927	247	203
732.741	240	200
738.551	240	201
744.366	240	208
750.18	233	202
755.985	242	204
761.789	240	200
767.604	242	212
773.418	245	203
779.234	242	200
785.053	246	211
790.875	246	211
796.688	242	209
802.505	245	202
808.322	239	206
814.136	236	201
819.956	244	205
825.771	239	204
831.588	243	202
837.404	243	197
843.222	240	201
849.043	242	198
854.873	236	193
860.69	240	196
866.496	244	200
872.303	242	203
878.118	242	206
883.93	243	200
889.743	246	198
895.55	245	200
901.352	234	201
907.177	239	201
912.997	236	195
918.823	241	206
924.645	235	197
930.458	237	199
936.27	237	196
942.088	238	198
947.9	242	194
953.717	239	194
959.533	240	197
965.346	239	192
971.166	241	200
976.987	238	196
982.811	239	192
988.639	244	196
994.446	240	190
1000.26	243	194
1006.07	241	198
1011.88	242	188
1017.7	247	199
1023.52	247	196
1029.33	238	195
1035.14	242	189
1040.96	235	193
1046.77	242	196
1052.59	242	193
1058.39	240	185
1064.2	237	192
1070.01	238	196
1075.84	236	193
1081.76	230	203
1087.68	235	192
1093.49	243	200
1099.31	232	197
1105.12	235	195
1110.93	231	191
1116.76	239	195
1122.57	242	185
1128.39	242	194
1134.2	241	191
1140.02	239	192
1145.85	235	188
1151.68	238	190
1157.49	240	190
1163.3	237	186
1169.12	240	183
1174.93	240	187
1180.74	246	192
1186.55	242	192
1192.35	240	194
1198.15	245	191
1203.97	240	189
1209.8	242	187
1215.62	240	181
1221.45	236	184
1227.27	238	183
1233.09	242	189
1238.9	239	190
1244.7	241	189
1250.51	247	192
1256.32	237	187
1262.13	241	184
1267.94	237	189
1273.76	238	188
1279.59	234	192
1285.41	245	187
1291.23	236	184
1297.05	236	190
1302.86	240	184
1308.68	241	190
1314.48	238	186
1320.29	239	183
1326.09	241	181
1331.89	234	185
1337.71	231	185
1343.54	238	187
1349.36	241	187
1355.19	243	186
1361.01	239	187
1366.83	239	182
1372.65	238	186
1378.46	241	183
1384.27	240	188
1390.08	240	189
1395.89	242	184
1401.7	240	185
1407.52	237	186
1413.32	238	184
1419.14	241	187
1424.95	233	192
1430.77	243	187
1436.58	240	188
1442.39	237	189
1448.2	236	189
1454.01	238	190
1459.82	242	182
1465.62	238	188
1471.44	241	183
1477.25	243	181
1483.06	240	185
1488.87	243	186
1494.68	235	187
1500.5	241	180
1506.32	241	182
1512.13	242	181
1517.94	237	190
1523.76	232	177
1529.58	240	187
1535.38	240	182
1541.2	241	176
1547.01	242	179
1552.83	237	182
1558.65	249	179
1564.47	238	183
1570.28	238	185
1576.09	238	178
1581.91	235	178
1587.73	244	182
1593.54	244	182
1599.35	239	186
1605.16	236	185
1610.96	241	183
1616.78	234	178
1622.58	242	181
1628.39	232	183
1634.19	238	186
1640.01	239	180
1645.81	243	184
1651.64	240	182
1657.45	240	180
1663.26	241	180
1669.07	235	177
1674.89	242	179
1680.7	239	178
1686.52	241	183
1692.33	235	182
1698.13	237	173
1703.95	238	177
1709.77	240	185
1715.59	239	178
1721.4	234	185
1727.21	241	180
1733.02	239	181
1738.84	242	177
1744.63	238	179
1750.44	238	185
1756.24	233	176
1762.06	234	183
1767.88	232	178
1773.7	241	172
1779.5	236	179
1785.33	237	173
1791.15	235	176
1796.97	236	178
1802.78	244	174
1808.59	242	183
1814.4	235	183
1820.2	235	180
1826	239	180
1831.82	234	176
1837.64	238	174
1843.45	240	173
1849.26	238	177
1855.08	240	175
1860.9	243	174
1866.7	240	181
1872.5	242	176
1878.3	243	186
1884.11	241	177
1889.93	242	174
1895.75	231	183
1901.56	245	174
1907.38	237	175
1913.2	241	173
1919.02	237	172
1924.84	244	178
1930.65	241	175
1936.47	234	174
1942.27	243	173
1948.07	240	180
1953.88	239	177
1959.69	236	176
1965.5	239	172
1971.32	240	174
1977.14	239	175
1982.97	240	174
1988.78	240	175
1994.61	239	174
2000.43	243	178
2006.24	239	177
2012.05	238	176
2017.86	234	179
2023.67	241	174
2029.49	240	177
2035.31	236	172
2041.12	236	174
2046.94	241	171
2052.75	238	175
2058.56	233	174
2064.37	238	176
2070.19	242	176
2076	234	173
2081.81	238	179
2087.63	233	179
2093.45	240	185
2099.27	235	177
2105.1	238	178
2110.91	244	174
2116.73	241	178
2122.54	235	176
2128.35	238	176
2134.15	234	172
2139.97	240	166
2145.79	240	176
2151.6	237	182
2157.4	247	182
2163.21	242	177
2169.01	230	183
2174.82	235	181
2180.63	238	179
2186.43	239	176
2192.24	237	179
2198.06	242	174
2203.88	239	179
2209.7	237	169
2215.52	234	175
2221.34	243	173
2227.14	233	178
2232.96	241	177
2238.78	238	177
2244.58	238	180
2250.39	245	175
2256.19	238	178
2262.01	239	176
2267.83	239	182
2273.65	237	164
2279.46	243	173
2285.27	242	172
2291.08	241	179
2296.9	247	176
2302.72	242	173
2308.52	243	178
2314.33	240	168
2320.14	245	170
2325.97	238	167
2331.8	240	167
2337.61	238	167
2343.43	237	169
2349.25	236	173
2355.06	244	170
2360.88	237	168
2366.68	238	170
2372.5	241	175
2378.3	237	167
2384.11	238	170
2389.93	238	172
2395.76	240	168
2401.57	237	169
2407.39	237	172
2413.2	234	173
2419.02	236	173
2424.85	240	172
2430.66	239	177
2436.46	235	177
2442.26	243	175
2448.06	239	175
2453.87	233	172
2459.68	232	181
2465.51	228	185
2471.34	229	172
2477.14	221	171
2482.96	237	178
2488.77	227	171
2494.57	234	178
2500.37	233	175
2506.18	234	171
2512	236	172
2517.81	230	176
2523.63	230	171
2529.45	234	178
2535.27	239	173
2541.09	234	175
2546.91	233	177
2552.72	231	174
2558.53	233	174
2564.34	230	169
2570.15	234	173
2575.96	237	177
2581.77	230	179
2587.59	231	170
2593.41	232	173
2599.24	232	170
2605.05	234	176
2610.87	233	170
2616.68	237	176
2622.48	228	171
2628.3	236	174
2634.11	231	170
2639.92	231	172
2645.73	231	177
2651.54	240	182
2657.35	239	167
2663.17	243	169
2668.99	238	168
2674.81	236	169
2680.62	241	165
2686.42	240	169
2692.23	238	164
2698.04	235	166
2703.86	240	168
2709.67	240	175
2715.48	240	167
2721.3	233	166
2727.12	239	159
2732.93	237	165
2738.75	238	165
2744.54	239	163
2750.35	232	162
2756.16	242	160
2761.98	236	168
2767.78	238	170
2773.59	239	165
2779.4	242	155
2785.21	237	171
2791.01	238	163
2796.83	240	171
2802.64	234	167
2808.45	241	166
2814.26	237	168
2820.08	243	166
2825.89	242	168
2831.72	236	163
2837.53	238	172
2843.34	237	170
2849.16	241	177
2854.98	239	174
2860.8	241	172
2866.6	238	169
2872.4	235	173
2878.21	236	167
2884.04	239	165
2889.85	242	171
2895.67	237	167
2901.48	241	179
2907.29	234	173
2913.1	238	166
2918.91	237	179
2924.71	235	167
2930.51	238	167
2936.32	232	167
2942.14	235	165
2947.96	233	172
2953.78	241	169
2959.6	240	166
2965.43	237	168
2971.24	237	171
2977.05	233	162
2982.86	242	166
2988.67	236	172
2994.47	238	171
3000.28	235	168
3006.11	237	166
3011.92	236	172
3017.74	238	168
3023.56	235	163
3029.38	239	168
3035.2	239	173
3041.01	230	168
3046.82	238	171
3052.62	237	169
3058.43	232	172
3064.24	240	171
3070.05	238	169
3075.87	228	169
3081.68	240	164
3087.5	236	171
3093.33	240	172
3099.15	239	166
3104.97	241	168
3110.78	235	166
3116.59	239	166
3122.39	240	167
3128.2	236	163
3134.01	236	169
3139.83	238	173
3145.63	232	164
3151.45	234	172
3157.27	233	171
3163.09	232	168
3168.91	230	166
3174.72	242	169
3180.53	240	167
3186.33	233	169
3192.15	239	172
3197.97	234	164
3203.79	237	173
3209.6	233	164
3215.42	238	165
3221.24	236	169
3227.05	236	162
3232.88	237	169
3238.68	237	166
3244.49	235	171
3250.3	234	160
3256.13	243	157
3261.95	237	166
3267.76	236	174
3273.58	240	168
3279.4	240	166
3285.22	234	159
3291.04	239	168
3296.86	238	165
3302.66	238	166
3308.47	237	166
3314.27	244	169
3320.09	240	166
3325.91	232	158
3331.72	232	164
3337.53	235	158
3343.35	237	153
3349.16	241	158
3354.98	239	161
3360.78	240	166
3366.59	237	155
3372.4	237	166
3378.22	236	163
3384.04	231	167
3389.86	240	162
3395.67	236	167
3401.48	240	160
3407.29	235	161
3413.1	236	158
3418.92	237	166
3424.73	237	163
3430.53	237	160
3436.33	237	156
3442.15	241	172
3447.97	241	158
3453.78	236	168
3459.6	244	173
3465.41	238	163
3471.22	233	164
3477.03	236	156
3482.86	231	154
3488.66	234	157
3494.46	240	162
3500.27	239	162
3506.09	239	161
3511.92	239	155
3517.74	241	166
3523.57	237	164
3529.38	235	155
3535.18	241	156
3540.99	236	153
3546.79	243	168
3552.59	237	163
3558.41	238	160
3564.23	238	168
3570.05	238	164
3575.87	237	159
3581.7	242	166
3587.5	236	161
3593.3	238	160
3599.09	240	161
