# Supplementary material for: ARL3 activation requires the co-GEF BART and effector-mediated turnover
Source: eLife. 2021 Jan 13;10:e64624. doi: 10.7554/eLife.64624 (PMC7817177; doi:10.7554/eLife.64624)
Supplement: Figure 4—source data 2. [file elife-64624-fig4-data2.xlsx]

## Sheet: multiple turnover BART UNC
time (s)	13B	13B+UNC	13B+BART	13B+both
0	266	261	267	255
7.592	275	266	262	261
15.182	264	264	264	249
22.775	261	265	263	260
30.376	268	266	266	249
37.976	269	260	274	248
45.569	261	264	254	239
53.166	266	260	263	247
60.768	265	273	258	246
68.386	265	248	264	244
76.004	266	268	258	247
83.606	260	256	253	257
91.2	274	264	258	242
98.792	257	270	253	249
106.394	263	264	257	246
113.995	261	265	254	247
121.594	265	265	247	228
129.182	272	268	252	240
136.768	265	277	250	244
144.359	252	263	257	243
151.963	255	256	248	242
159.554	266	262	259	245
167.146	280	269	248	241
174.739	271	268	248	242
182.328	269	264	252	232
189.921	261	268	245	233
197.515	269	262	255	238
205.105	259	268	240	234
212.691	264	268	234	236
220.289	263	266	252	229
227.892	261	270	238	226
235.487	264	271	239	231
243.072	265	263	245	230
250.666	254	255	242	232
258.266	255	259	249	228
265.876	269	262	241	235
273.456	262	254	239	235
281.048	266	261	242	227
288.656	250	253	244	225
296.262	246	255	235	241
303.848	258	266	251	222
311.44	261	264	239	232
319.028	262	267	248	226
326.622	253	258	240	225
334.215	258	259	239	221
341.821	254	265	224	226
349.416	258	265	239	231
357.006	254	258	243	225
364.596	260	249	235	225
372.187	261	265	233	230
379.785	251	252	230	232
387.376	249	256	247	232
394.967	247	259	225	217
402.562	254	266	243	226
410.152	255	255	233	226
417.757	251	255	240	226
425.347	259	257	230	228
432.931	252	252	230	225
440.517	250	255	231	216
448.104	255	261	235	234
455.71	255	253	238	225
463.286	256	250	226	237
470.884	262	252	237	214
478.472	248	261	232	216
486.073	255	249	238	225
493.679	254	256	233	221
501.279	252	257	235	210
508.872	258	265	230	230
516.47	260	259	236	213
524.065	262	262	231	220
531.661	257	260	233	215
539.242	255	251	228	218
546.838	252	257	242	221
554.435	251	259	235	230
562.025	256	249	223	224
569.625	255	258	230	215
577.216	263	266	221	221
584.806	260	245	235	218
592.398	252	252	230	211
599.989	262	252	231	216
607.586	260	253	227	215
615.174	265	252	227	216
622.764	256	259	233	217
630.354	267	252	230	219
637.943	252	263	231	226
645.535	254	250	233	209
653.123	254	244	228	229
660.707	264	250	230	215
668.298	267	263	225	214
675.902	246	244	214	221
683.491	260	245	227	222
691.074	260	255	238	208
698.686	253	248	225	211
706.286	263	258	221	214
713.889	247	244	216	212
721.478	259	248	234	214
729.073	262	252	225	215
736.658	249	246	231	216
744.251	264	256	221	213
751.851	259	261	230	221
759.441	268	246	225	226
767.043	255	247	224	207
774.64	248	251	230	214
782.231	260	256	221	213
789.821	259	255	217	221
797.409	251	257	217	212
805.009	257	247	223	210
812.607	254	257	233	210
820.196	253	253	224	215
827.786	250	244	217	210
835.374	253	240	224	207
842.984	251	245	231	209
850.59	248	248	222	212
858.175	251	250	224	208
865.767	251	251	227	207
873.355	245	248	226	215
880.949	254	249	227	211
888.542	253	252	225	210
896.134	248	245	217	211
903.719	252	253	223	200
911.321	253	249	218	201
918.935	258	241	221	201
926.545	257	253	219	203
934.147	246	250	225	196
941.747	242	241	225	213
949.337	261	250	223	199
956.937	252	250	220	207
964.529	258	255	219	205
972.127	245	255	220	203
979.721	239	244	213	210
987.305	252	245	220	205
994.894	255	250	218	192
1002.5	258	255	218	197
1010.09	258	246	229	193
1017.68	252	259	213	203
1025.29	247	245	219	192
1032.89	256	261	213	197
1040.5	254	241	211	198
1048.09	253	241	210	203
1055.69	250	247	219	203
1063.27	241	255	217	199
1070.87	249	262	217	196
1078.48	252	249	216	199
1086.07	242	242	207	206
1093.66	242	247	216	197
1101.25	250	250	217	206
1108.84	250	240	218	214
1116.43	251	254	217	203
1124.05	253	236	217	207
1131.65	253	247	223	201
1139.26	257	244	221	202
1146.88	247	249	220	204
1154.49	250	246	220	203
1162.09	245	250	218	199
1169.68	248	246	214	196
1177.28	249	249	207	192
1184.88	259	247	215	202
1192.47	248	249	207	194
1200.07	256	247	203	202
1207.66	257	253	208	201
1215.25	249	246	212	212
1222.85	256	243	215	195
1230.46	243	248	220	192
1238.06	240	246	206	197
1245.64	245	239	213	198
1253.23	252	236	212	197
1260.83	245	247	217	200
1268.43	254	249	211	194
1276.03	246	253	216	197
1283.62	244	238	213	195
1291.2	245	252	207	197
1298.79	256	248	218	194
1306.38	247	238	203	194
1313.98	255	244	216	185
1321.57	256	245	216	194
1329.16	247	241	205	192
1336.76	251	235	218	197
1344.36	249	244	209	197
1351.97	256	254	214	191
1359.57	249	244	218	190
1367.16	245	240	216	192
1374.76	251	245	211	194
1382.35	241	244	211	197
1389.94	251	246	212	188
1397.54	248	247	210	193
1405.13	257	248	211	192
1412.7	246	245	217	197
1420.32	257	254	214	187
1427.91	248	250	213	193
1435.5	246	244	215	190
1443.09	253	242	207	190
1450.68	257	240	209	193
1458.29	251	237	206	187
1465.88	250	245	208	195
1473.47	248	240	210	183
1481.06	257	236	215	180
1488.65	249	252	208	182
1496.26	249	248	213	192
1503.85	252	253	215	201
1511.45	245	255	221	186
1519.04	249	257	212	191
1526.64	245	240	206	181
1534.24	239	251	211	204
1541.84	248	244	211	189
1549.43	247	246	214	199
1557.03	242	235	204	191
1564.62	256	252	212	188
1572.24	239	241	213	189
1579.83	247	242	223	189
1587.42	243	247	212	190
1595.01	252	250	215	185
1602.6	243	245	204	195
1610.21	253	244	211	188
1617.8	247	243	215	192
1625.38	247	254	213	186
1632.96	247	248	219	188
1640.56	243	250	197	191
1648.14	250	246	218	193
1655.74	253	243	210	190
1663.33	246	244	208	187
1670.92	249	246	213	187
1678.51	247	245	204	201
1686.1	247	244	215	193
1693.7	248	242	210	188
1701.3	252	246	209	185
1708.88	246	244	213	193
1716.47	248	245	204	184
1724.07	256	243	209	184
1731.67	248	244	208	179
1739.28	252	241	200	190
1746.87	249	245	207	189
1754.46	248	246	203	190
1762.06	235	240	208	182
1769.66	246	251	213	195
1777.25	247	244	216	185
1784.84	250	243	213	183
1792.42	248	251	203	189
1800.02	253	244	216	193
1807.6	250	249	213	186
1815.17	247	239	213	201
1822.77	249	245	204	186
1830.36	254	243	208	180
1837.95	252	233	205	180
1845.54	254	253	206	186
1853.12	250	249	219	185
1860.71	246	241	209	180
1868.31	246	240	210	199
1875.9	241	243	210	193
1883.49	249	232	204	186
1891.07	245	252	210	190
1898.67	243	234	208	196
1906.26	246	244	202	178
1913.85	254	237	210	180
1921.43	252	241	203	180
1929.02	250	244	208	181
1936.61	242	242	211	177
1944.2	252	249	220	175
1951.8	244	241	201	185
1959.39	248	239	206	181
1966.99	248	241	206	190
1974.59	254	250	203	187
1982.2	247	247	206	192
1989.8	245	248	207	183
1997.39	236	242	204	192
2005	248	249	201	183
2012.6	247	243	207	184
2020.19	246	230	201	180
2027.79	242	247	209	178
2035.38	244	252	206	177
2042.98	254	244	208	183
2050.57	241	232	207	188
2058.17	237	253	208	182
2065.75	243	242	206	172
2073.34	240	242	203	181
2080.92	240	243	205	190
2088.52	241	239	199	189
2096.11	249	239	201	181
2103.7	245	241	202	186
2111.28	255	255	205	176
2118.88	255	237	209	179
2126.47	242	235	209	182
2134.05	245	237	196	175
2141.63	245	246	201	181
2149.22	240	254	210	179
2156.82	243	246	211	176
2164.41	249	241	198	181
2172	235	245	195	175
2179.59	248	235	199	172
2187.18	260	247	209	180
2194.79	242	241	203	170
2202.38	244	245	202	170
2209.98	243	247	204	185
2217.56	257	240	196	181
2225.15	246	236	215	179
2232.76	252	240	194	177
2240.35	251	245	209	171
2247.94	243	245	199	171
2255.52	240	236	206	175
2263.11	251	241	201	170
2270.7	246	242	194	173
2278.29	248	236	207	175
2285.88	245	238	196	171
2293.46	252	246	198	180
2301.05	244	244	206	183
2308.66	240	236	200	176
2316.26	252	241	193	182
2323.85	233	236	204	174
2331.43	240	244	199	166
2339.03	250	238	217	172
2346.64	240	246	200	183
2354.24	246	240	211	166
2361.84	257	246	202	167
2369.42	248	233	196	175
2377.01	255	238	200	179
2384.61	252	235	206	183
2392.2	255	243	205	181
2399.79	253	236	200	175
2407.39	245	239	211	172
2414.99	247	240	199	177
2422.6	253	237	198	171
2430.21	246	246	200	174
2437.81	245	229	201	176
2445.4	255	226	209	170
2453.01	245	235	197	173
2460.6	253	237	197	177
2468.2	250	241	201	180
2475.8	246	245	204	181
2483.38	249	240	202	175
2490.97	237	236	201	166
2498.57	242	227	200	181
2506.17	248	238	205	174
2513.76	251	230	194	182
2521.35	242	239	196	179
2528.95	247	239	201	164
2536.54	258	238	200	174
2544.15	253	233	197	176
2551.73	242	235	204	174
2559.31	241	242	204	176
2566.9	241	243	199	169
2574.5	242	236	201	173
2582.11	246	243	202	177
2589.69	244	240	196	174
2597.27	250	242	202	172
2604.86	256	237	195	176
2612.47	244	241	203	171
2620.09	241	236	203	171
2627.67	240	235	203	177
2635.27	238	238	206	170
2642.86	247	235	203	175
2650.46	239	239	201	172
2658.06	244	238	202	175
2665.65	245	238	201	174
2673.24	251	241	202	170
2680.83	241	239	198	164
2688.43	240	238	197	168
2696.03	249	247	199	177
2703.61	245	235	204	169
2711.2	242	241	205	176
2718.8	239	241	200	166
2726.39	239	241	204	170
2733.99	239	244	202	176
2741.58	238	239	199	170
2749.17	241	242	201	170
2756.76	249	242	201	172
2764.35	241	238	208	176
2771.95	247	234	199	173
2779.53	247	241	202	166
2787.12	244	242	196	172
2794.72	243	237	200	172
2802.31	240	234	206	180
2809.91	245	234	211	172
2817.5	241	240	199	164
2825.1	238	239	201	171
2832.7	243	240	202	178
2840.31	245	238	205	165
2847.91	242	234	199	172
2855.5	239	233	195	177
2863.09	238	232	201	167
2870.68	248	232	208	170
2878.28	241	234	208	164
2885.88	241	241	200	178
2893.47	252	236	191	166
2901.05	242	238	197	171
2908.65	248	236	198	170
2916.24	240	237	196	175
2923.84	245	245	199	169
2931.43	241	237	201	168
2939.04	244	237	195	178
2946.62	240	231	197	174
2954.22	238	238	209	163
2961.81	241	240	204	172
2969.39	251	234	191	165
2976.99	243	241	209	170
2984.58	241	234	205	164
2992.16	247	242	208	164
2999.74	245	239	207	168
3007.33	245	238	204	166
3014.93	235	235	202	163
3022.51	248	231	196	164
3030.12	243	233	200	167
3037.71	241	234	197	166
3045.3	230	244	199	178
3052.91	237	234	201	163
3060.5	241	242	206	171
3068.1	234	227	188	163
3075.68	237	230	200	176
3083.26	244	235	199	169
3090.86	241	235	194	171
3098.46	242	240	199	164
3106.05	240	241	198	157
3113.63	240	229	198	165
3121.22	242	229	197	166
3128.83	243	234	195	166
3136.43	243	228	201	168
3144.02	244	236	205	163
3151.6	243	239	211	166
3159.19	233	238	210	171
3166.79	247	233	203	173
3174.38	249	223	199	167
3181.98	239	237	196	165
3189.56	235	236	199	164
3197.16	239	239	199	167
3204.76	242	241	193	166
3212.36	242	238	203	163
3219.95	236	237	198	164
3227.54	236	236	200	167
3235.13	245	234	206	157
3242.74	243	231	197	164
3250.34	244	241	190	166
3257.95	244	236	202	162
3265.54	242	234	205	160
3273.14	240	226	196	165
3280.74	241	234	195	171
3288.32	246	238	198	166
3295.91	241	231	197	164
3303.5	241	237	199	163
3311.1	235	234	196	166
3318.68	242	232	206	175
3326.28	237	244	197	168
3333.87	242	236	201	170
3341.45	244	237	192	168
3349.05	242	233	197	170
3356.63	244	230	197	158
3364.23	239	234	198	166
3371.81	245	239	205	161
3379.39	247	239	195	164
3386.98	247	225	195	166
3394.56	252	237	193	164
3402.16	254	239	198	168
3409.75	240	234	196	162
3417.34	245	238	202	163
3424.94	236	236	198	163
3432.54	237	235	198	164
3440.14	237	235	197	173
3447.71	244	235	198	160
3455.31	243	232	200	162
3462.91	238	240	196	157
3470.52	243	234	195	163
3478.14	243	239	199	158
3485.73	248	229	195	163
3493.31	241	234	202	163
3500.91	244	229	194	160
3508.52	241	240	195	166
3516.12	243	234	198	160
3523.7	237	234	203	167
3531.28	237	233	203	166
3538.87	244	238	192	164
3546.48	233	232	200	161
3554.07	238	232	199	164
3561.66	238	236	200	158
3569.26	240	233	195	156
3576.86	237	235	193	162
3584.46	242	229	202	171
