# Supplementary material for: ARL3 activation requires the co-GEF BART and effector-mediated turnover
Source: eLife. 2021 Jan 13;10:e64624. doi: 10.7554/eLife.64624 (PMC7817177; doi:10.7554/eLife.64624)
Supplement: Figure 4—source data 3. [file elife-64624-fig4-data3.xlsx]

## Sheet: Sheet1
Time	RU(Buffer)	Time	RU(2uM PDEd)
-40	0.3832	-40	0.6329
-39.9	-0.1728	-39.9	0.1711
-39.8	-0.5306	-39.8	-0.8601
-39.7	-0.3659	-39.7	0.1167
-39.6	-0.2036	-39.6	0.0451
-39.5	-0.0877	-39.5	-1.0223
-39.4	0.2091	-39.4	0.442
-39.3	0.5769	-39.3	-0.0668
-39.2	0.4496	-39.2	0.0387
-39.1	0.4119	-39.1	-0.0025
-39	0.3948	-39	0.0333
-38.9	0.3888	-38.9	-0.0101
-38.8	0.3073	-38.8	0.0286
-38.7	0.3968	-38.7	0.0183
-38.6	0.3989	-38.6	0.0817
-38.5	0.4803	-38.5	0.0866
-38.4	0.5616	-38.4	0.2006
-38.3	0.6499	-38.3	0.3357
-38.2	0.6558	-38.2	0.4272
-38.1	0.6527	-38.1	0.4739
-38	0.5911	-38	0.4944
-37.9	0.2847	-37.9	0.2125
-37.8	0.1798	-37.8	0.2441
-37.7	0.0668	-37.7	0.2615
-37.6	-0.0243	-37.6	0.1849
-37.5	-0.056	-37.5	0.1397
-37.4	-0.0843	-37.4	0.0837
-37.3	-0.1697	-37.3	0.0458
-37.2	-0.1792	-37.2	-0.0003
-37.1	-0.1898	-37.1	-0.0686
-37	-0.1885	-37	-0.1164
-36.9	-0.1775	-36.9	-0.1346
-36.8	-0.1739	-36.8	-0.1442
-36.7	-0.1498	-36.7	-0.1261
-36.6	-0.1507	-36.6	-0.1191
-36.5	-0.1301	-36.5	-0.085
-36.4	-0.1163	-36.4	-0.0535
-36.3	-0.1063	-36.3	-0.0464
-36.2	-0.103	-36.2	-0.022
-36.1	-0.0797	-36.1	-0.0227
-36	-0.1023	-36	-0.017
-35.9	-0.0975	-35.9	-0.0192
-35.8	-0.073	-35.8	0.0082
-35.7	-0.094	-35.7	0.0123
-35.6	-0.0891	-35.6	0.0148
-35.5	-0.071	-35.5	0.0079
-35.4	-0.0795	-35.4	-0.0053
-35.3	-0.0806	-35.3	-0.0027
-35.2	-0.0771	-35.2	-0.0044
-35.1	-0.0779	-35.1	-0.0075
-35	-0.0737	-35	-0.001
-34.9	-0.0773	-34.9	0.0011
-34.8	-0.0764	-34.8	0.0093
-34.7	-0.0759	-34.7	0.0072
-34.6	-0.0758	-34.6	0.0074
-34.5	-0.0734	-34.5	0.0082
-34.4	-0.0623	-34.4	0.0046
-34.3	-0.0682	-34.3	0.0127
-34.2	-0.0673	-34.2	0.0129
-34.1	-0.0616	-34.1	0.0141
-34	-0.0583	-34	0.0175
-33.9	-0.0584	-33.9	0.0203
-33.8	-0.0536	-33.8	0.0224
-33.7	-0.0533	-33.7	0.0295
-33.6	-0.0529	-33.6	0.0336
-33.5	-0.0529	-33.5	0.0329
-33.4	-0.052	-33.4	0.0312
-33.3	-0.0496	-33.3	0.036
-33.2	-0.049	-33.2	0.0392
-33.1	-0.0457	-33.1	0.0422
-33	-0.0456	-33	0.0448
-32.9	-0.0452	-32.9	0.045
-32.8	-0.0439	-32.8	0.0464
-32.7	-0.0409	-32.7	0.0479
-32.6	-0.0417	-32.6	0.0487
-32.5	-0.0421	-32.5	0.0514
-32.4	-0.0404	-32.4	0.0523
-32.3	-0.039	-32.3	0.0568
-32.2	-0.0394	-32.2	0.0606
-32.1	-0.0391	-32.1	0.0634
-32	-0.0379	-32	0.0646
-31.9	-0.0364	-31.9	0.0662
-31.8	-0.0337	-31.8	0.0664
-31.7	-0.0333	-31.7	0.0708
-31.6	-0.0334	-31.6	0.0702
-31.5	-0.0348	-31.5	0.0733
-31.4	-0.0333	-31.4	0.0746
-31.3	-0.0324	-31.3	0.0737
-31.2	-0.0318	-31.2	0.0754
-31.1	-0.0308	-31.1	0.0794
-31	-0.0304	-31	0.0816
-30.9	-0.032	-30.9	0.0815
-30.8	-0.0321	-30.8	0.0833
-30.7	-0.0313	-30.7	0.0834
-30.6	-0.0313	-30.6	0.086
-30.5	-0.0286	-30.5	0.0848
-30.4	-0.0302	-30.4	0.0854
-30.3	-0.0319	-30.3	0.0834
-30.2	-0.0284	-30.2	0.0861
-30.1	-0.0231	-30.1	0.0864
-30	-0.0227	-30	0.0865
-29.9	-0.0193	-29.9	0.0825
-29.8	-0.0199	-29.8	0.0837
-29.7	-0.0195	-29.7	0.0852
-29.6	-0.0166	-29.6	0.0867
-29.5	-0.0171	-29.5	0.0874
-29.4	-0.0158	-29.4	0.0877
-29.3	-0.0151	-29.3	0.0911
-29.2	-0.0171	-29.2	0.0941
-29.1	-0.0171	-29.1	0.0926
-29	-0.0161	-29	0.0945
-28.9	-0.0134	-28.9	0.0951
-28.8	-0.0153	-28.8	0.0972
-28.7	-0.017	-28.7	0.0982
-28.6	-0.0187	-28.6	0.0972
-28.5	-0.0169	-28.5	0.0951
-28.4	-0.0173	-28.4	0.0952
-28.3	-0.0191	-28.3	0.0987
-28.2	-0.0229	-28.2	0.0996
-28.1	-0.0227	-28.1	0.101
-28	-0.0247	-28	0.0996
-27.9	-0.0231	-27.9	0.095
-27.8	-0.0217	-27.8	0.0914
-27.7	-0.0258	-27.7	0.0903
-27.6	-0.0269	-27.6	0.0923
-27.5	-0.0267	-27.5	0.0905
-27.4	-0.0271	-27.4	0.0904
-27.3	-0.027	-27.3	0.0918
-27.2	-0.0272	-27.2	0.0908
-27.1	-0.0278	-27.1	0.0897
-27	-0.0303	-27	0.0885
-26.9	-0.0287	-26.9	0.0865
-26.8	-0.0278	-26.8	0.085
-26.7	-0.0263	-26.7	0.0854
-26.6	-0.0269	-26.6	0.0862
-26.5	-0.0264	-26.5	0.0857
-26.4	-0.0254	-26.4	0.0852
-26.3	-0.0236	-26.3	0.0837
-26.2	-0.0256	-26.2	0.0812
-26.1	-0.0235	-26.1	0.0792
-26	-0.0238	-26	0.0766
-25.9	-0.0252	-25.9	0.0741
-25.8	-0.0233	-25.8	0.0755
-25.7	-0.0241	-25.7	0.0777
-25.6	-0.0251	-25.6	0.0742
-25.5	-0.024	-25.5	0.0705
-25.4	-0.0229	-25.4	0.0711
-25.3	-0.0228	-25.3	0.0705
-25.2	-0.0243	-25.2	0.0681
-25.1	-0.0238	-25.1	0.0656
-25	-0.0247	-25	0.0632
-24.9	-0.0229	-24.9	0.0613
-24.8	-0.0233	-24.8	0.0624
-24.7	-0.0214	-24.7	0.0611
-24.6	-0.0223	-24.6	0.0624
-24.5	-0.0254	-24.5	0.0637
-24.4	-0.0271	-24.4	0.064
-24.3	-0.0245	-24.3	0.0622
-24.2	-0.0235	-24.2	0.0646
-24.1	-0.0252	-24.1	0.0634
-24	-0.0265	-24	0.0652
-23.9	-0.0279	-23.9	0.0614
-23.8	-0.029	-23.8	0.0613
-23.7	-0.0281	-23.7	0.0601
-23.6	-0.0268	-23.6	0.0593
-23.5	-0.0304	-23.5	0.0579
-23.4	-0.0306	-23.4	0.0606
-23.3	-0.0298	-23.3	0.0589
-23.2	-0.0299	-23.2	0.0596
-23.1	-0.0316	-23.1	0.0579
-23	-0.031	-23	0.0572
-22.9	-0.0338	-22.9	0.0569
-22.8	-0.034	-22.8	0.0549
-22.7	-0.0313	-22.7	0.0567
-22.6	-0.026	-22.6	0.0601
-22.5	-0.0301	-22.5	0.0609
-22.4	-0.0342	-22.4	0.0625
-22.3	-0.0297	-22.3	0.0592
-22.2	-0.0281	-22.2	0.0566
-22.1	-0.0262	-22.1	0.0604
-22	-0.0247	-22	0.0603
-21.9	-0.0264	-21.9	0.0644
-21.8	-0.0281	-21.8	0.0635
-21.7	-0.0181	-21.7	0.0612
-21.6	-0.0055	-21.6	0.0622
-21.5	0.0004	-21.5	0.0605
-21.4	0.0137	-21.4	0.0609
-21.3	0.0272	-21.3	0.0629
-21.2	0.0327	-21.2	0.066
-21.1	0.032	-21.1	0.0702
-21	0.0353	-21	0.0699
-20.9	0.0318	-20.9	0.0713
-20.8	0.0288	-20.8	0.0792
-20.7	0.0258	-20.7	0.0825
-20.6	0.0233	-20.6	0.0837
-20.5	0.019	-20.5	0.0915
-20.4	0.0169	-20.4	0.097
-20.3	0.0117	-20.3	0.0985
-20.2	0.0153	-20.2	0.1005
-20.1	0.0196	-20.1	0.0949
-20	0.0251	-20	0.0897
-19.9	0.0259	-19.9	0.0868
-19.8	0.025	-19.8	0.0882
-19.7	0.0226	-19.7	0.0895
-19.6	0.0223	-19.6	0.0935
-19.5	0.0238	-19.5	0.0936
-19.4	0.0217	-19.4	0.1032
-19.3	0.0216	-19.3	0.1161
-19.2	0.0203	-19.2	0.1232
-19.1	0.016	-19.1	0.1261
-19	0.0168	-19	0.1234
-18.9	0.0224	-18.9	0.1222
-18.8	0.0198	-18.8	0.1115
-18.7	0.016	-18.7	0.1053
-18.6	0.0092	-18.6	0.0986
-18.5	0.0051	-18.5	0.0929
-18.4	-0.0016	-18.4	0.095
-18.3	-0.0095	-18.3	0.0995
-18.2	-0.0147	-18.2	0.106
-18.1	-0.013	-18.1	0.1115
-18	-0.0136	-18	0.1143
-17.9	-0.0119	-17.9	0.1195
-17.8	-0.0135	-17.8	0.1191
-17.7	-0.022	-17.7	0.1232
-17.6	-0.0302	-17.6	0.123
-17.5	-0.0363	-17.5	0.1118
-17.4	-0.0369	-17.4	0.1017
-17.3	-0.0317	-17.3	0.0939
-17.2	-0.0313	-17.2	0.0843
-17.1	-0.0328	-17.1	0.0768
-17	-0.0321	-17	0.0708
-16.9	-0.0275	-16.9	0.0669
-16.8	-0.0374	-16.8	0.0679
-16.7	-0.0484	-16.7	0.0735
-16.6	-0.0562	-16.6	0.0721
-16.5	-0.0589	-16.5	0.0715
-16.4	-0.0563	-16.4	0.0724
-16.3	-0.0584	-16.3	0.0726
-16.2	-0.0558	-16.2	0.0751
-16.1	-0.0552	-16.1	0.0722
-16	-0.0547	-16	0.0696
-15.9	-0.0571	-15.9	0.0649
-15.8	-0.0591	-15.8	0.0629
-15.7	-0.0678	-15.7	0.0697
-15.6	-0.0719	-15.6	0.0775
-15.5	-0.0721	-15.5	0.0764
-15.4	-0.0746	-15.4	0.0775
-15.3	-0.073	-15.3	0.0828
-15.2	-0.0727	-15.2	0.0792
-15.1	-0.0716	-15.1	0.0773
-15	-0.0747	-15	0.0683
-14.9	-0.0743	-14.9	0.0575
-14.8	-0.0766	-14.8	0.0467
-14.7	-0.0808	-14.7	0.0281
-14.6	-0.0791	-14.6	0.0128
-14.5	-0.0765	-14.5	0.0064
-14.4	-0.0761	-14.4	0.0025
-14.3	-0.0777	-14.3	-0.0002
-14.2	-0.0806	-14.2	-0.0018
-14.1	-0.0828	-14.1	0.0028
-14	-0.0786	-14	0.0156
-13.9	-0.0772	-13.9	0.0178
-13.8	-0.0725	-13.8	0.022
-13.7	-0.0696	-13.7	0.0211
-13.6	-0.0634	-13.6	0.0302
-13.5	-0.0604	-13.5	0.0318
-13.4	-0.0613	-13.4	0.0328
-13.3	-0.0677	-13.3	0.0401
-13.2	-0.066	-13.2	0.047
-13.1	-0.0696	-13.1	0.0473
-13	-0.0727	-13	0.0369
-12.9	-0.0746	-12.9	0.0282
-12.8	-0.0749	-12.8	0.0229
-12.7	-0.0719	-12.7	0.0185
-12.6	-0.0723	-12.6	0.0271
-12.5	-0.0697	-12.5	0.0325
-12.4	-0.0705	-12.4	0.0272
-12.3	-0.07	-12.3	0.0255
-12.2	-0.0668	-12.2	0.0229
-12.1	-0.0604	-12.1	0.0212
-12	-0.0564	-12	0.0223
-11.9	-0.0529	-11.9	0.0272
-11.8	-0.0543	-11.8	0.0272
-11.7	-0.0565	-11.7	0.0278
-11.6	-0.0592	-11.6	0.0264
-11.5	-0.0543	-11.5	0.0266
-11.4	-0.0563	-11.4	0.0249
-11.3	-0.0571	-11.3	0.0279
-11.2	-0.0586	-11.2	0.0262
-11.1	-0.0563	-11.1	0.0237
-11	-0.0537	-11	0.0241
-10.9	-0.049	-10.9	0.0197
-10.8	-0.0491	-10.8	0.0157
-10.7	-0.0491	-10.7	0.0209
-10.6	-0.0452	-10.6	0.0219
-10.5	-0.0443	-10.5	0.0168
-10.4	-0.0443	-10.4	0.0134
-10.3	-0.0456	-10.3	0.013
-10.2	-0.0466	-10.2	0.0107
-10.1	-0.0454	-10.1	0.015
-10	-0.044	-10	0.0125
-9.9	-0.0407	-9.9	0.0064
-9.8	-0.0413	-9.8	0.0043
-9.7	-0.0361	-9.7	0.0039
-9.6	-0.0304	-9.6	0.0034
-9.5	-0.0321	-9.5	0.0027
-9.4	-0.031	-9.4	0.0024
-9.3	-0.0309	-9.3	-0.0011
-9.2	-0.0307	-9.2	0.0033
-9.1	-0.0269	-9.1	-0.0028
-9	-0.0245	-9	-0.0059
-8.9	-0.029	-8.9	-0.0132
-8.8	-0.0315	-8.8	-0.0071
-8.7	-0.0305	-8.7	-0.0011
-8.6	-0.0257	-8.6	-0.009
-8.5	-0.021	-8.5	-0.011
-8.4	-0.0118	-8.4	-0.0072
-8.3	-0.0094	-8.3	-0.0068
-8.2	-0.0126	-8.2	-0.0059
-8.1	-0.0065	-8.1	-0.0082
-8	-0.0068	-8	-0.0058
-7.9	-0.0038	-7.9	-0.0056
-7.8	-0.0034	-7.8	-0.0028
-7.7	-0.0048	-7.7	-0.0025
-7.6	-0.0072	-7.6	-0.0009
-7.5	-0.0087	-7.5	-0.001
-7.4	-0.0108	-7.4	-0.005
-7.3	-0.0089	-7.3	-0.0046
-7.2	-0.0072	-7.2	-0.0058
-7.1	-0.0045	-7.1	-0.0041
-7	-0.0065	-7	-0.0031
-6.9	-0.0066	-6.9	-0.004
-6.8	-0.0063	-6.8	-0.0042
-6.7	-0.007	-6.7	-0.0012
-6.6	-0.003	-6.6	-0.0002
-6.5	-0.0028	-6.5	0.0016
-6.4	0.0005	-6.4	0.0046
-6.3	0.0026	-6.3	0.0057
-6.2	0.0001	-6.2	0.0028
-6.1	0.0007	-6.1	0.0006
-6	0.002	-6	0.0012
-5.9	-0.0005	-5.9	0.0018
-5.8	-0.0019	-5.8	0.0039
-5.7	-0.0035	-5.7	0.0053
-5.6	-0.0039	-5.6	0.0036
-5.5	-0.005	-5.5	0.0023
-5.4	-0.0016	-5.4	-0.0019
-5.3	0.0003	-5.3	-0.0018
-5.2	0	-5.2	-0.0009
-5.1	0.001	-5.1	0
-5	0	-5	0.002
-4.9	0.0013	-4.9	0.0019
-4.8	0.0013	-4.8	-0.001
-4.7	0.0006	-4.7	0.0001
-4.6	0.0003	-4.6	0.0015
-4.5	0.0011	-4.5	0.0022
-4.4	0.0005	-4.4	0.0033
-4.3	0.001	-4.3	0.0033
-4.2	0.0029	-4.2	0.0025
-4.1	0.0009	-4.1	0.0041
-4	0.0035	-4	0.0027
-3.9	0.0042	-3.9	-0.0017
-3.8	0.0044	-3.8	-0.0013
-3.7	0.0021	-3.7	-0.0032
-3.6	0.0073	-3.6	0
-3.5	0.0063	-3.5	0.0009
-3.4	0.0034	-3.4	-0.0017
-3.3	-0.0033	-3.3	-0.0018
-3.2	-0.0029	-3.2	-0.0005
-3.1	-0.0017	-3.1	-0.0003
-3	-0.0051	-3	-0.0008
-2.9	-0.0097	-2.9	-0.0005
-2.8	-0.0139	-2.8	-0.0017
-2.7	-0.0008	-2.7	-0.0021
-2.6	0.0068	-2.6	0.0036
-2.5	0.0051	-2.5	0.0041
-2.4	0.0085	-2.4	0.0051
-2.3	0.0067	-2.3	0.0058
-2.2	0.0008	-2.2	0.0032
-2.1	0.0048	-2.1	0.0057
-2	0.0008	-2	-0.0012
-1.9	0.003	-1.9	-0.0005
-1.8	0.0014	-1.8	0.0046
-1.7	0.0032	-1.7	0.0015
-1.6	0.0126	-1.6	-0.0031
-1.5	0.0196	-1.5	-0.0032
-1.4	0.0196	-1.4	0.004
-1.3	0.0234	-1.3	0.0011
-1.2	0.0246	-1.2	-0.0032
-1.1	0.0325	-1.1	-0.0032
-1	0.0541	-1	-0.0189
-0.899998	0.0674	-0.899998	-0.0189
-0.799999	0.0803	-0.799999	-0.0032
-0.699997	NaN	-0.699997	NaN
-0.599998	NaN	-0.599998	NaN
-0.5	NaN	-0.5	NaN
-0.399998	NaN	-0.399998	NaN
-0.299999	NaN	-0.299999	NaN
-0.199997	NaN	-0.199997	NaN
-0.0999985	NaN	-0.0999985	NaN
0	NaN	0	NaN
0.100002	NaN	0.100002	NaN
0.200001	NaN	0.200001	NaN
0.300003	NaN	0.300003	NaN
0.400002	NaN	0.400002	NaN
0.5	NaN	0.5	NaN
0.600002	NaN	0.600002	NaN
0.700001	NaN	0.700001	NaN
0.800003	NaN	0.800003	NaN
0.900002	NaN	0.900002	NaN
1	NaN	1	NaN
1.1	NaN	1.1	NaN
1.2	NaN	1.2	NaN
1.3	NaN	1.3	NaN
1.4	NaN	1.4	NaN
1.5	NaN	1.5	NaN
1.6	NaN	1.6	NaN
1.7	NaN	1.7	NaN
1.8	9.198	1.8	8.2377
1.9	9.7399	1.9	8.928
2	10.3757	2	9.6134
2.1	10.9954	2.1	10.2174
2.2	11.6279	2.2	10.8613
2.3	12.2724	2.3	11.5442
2.4	12.8598	2.4	12.1529
2.5	13.4547	2.5	12.7769
2.6	14.0915	2.6	13.3901
2.7	14.6962	2.7	14.0054
2.8	15.2571	2.8	14.5996
2.9	15.8369	2.9	15.1954
3	16.4214	3	15.8195
3.1	17.0099	3.1	16.4082
3.2	17.5985	3.2	17.0068
3.3	18.203	3.3	17.6007
3.4	18.7796	3.4	18.1859
3.5	19.3497	3.5	18.7558
3.6	19.9194	3.6	19.3291
3.7	20.462	3.7	19.8859
3.8	21.0242	3.8	20.4494
3.9	21.5586	3.9	21.0059
4	22.1073	4	21.5333
4.1	22.6265	4.1	22.0595
4.2	23.1606	4.2	22.5743
4.3	23.667	4.3	23.0706
4.4	24.1748	4.4	23.5616
4.5	24.6733	4.5	24.0526
4.6	25.1717	4.6	24.5391
4.7	25.6655	4.7	25.0035
4.8	26.1469	4.8	25.4639
4.9	26.6246	4.9	25.9158
5	27.0878	5	26.3671
5.1	27.5382	5.1	26.8094
5.2	27.9857	5.2	27.2355
5.3	28.4274	5.3	27.6537
5.4	28.8416	5.4	28.071
5.5	29.2621	5.5	28.4746
5.6	29.6639	5.6	28.8683
5.7	30.0586	5.7	29.2532
5.8	30.4434	5.8	29.6284
5.9	30.8193	5.9	29.9975
6	31.1786	6	30.3486
6.1	31.5371	6.1	30.6831
6.2	31.8914	6.2	31.0098
6.3	32.2577	6.3	31.3307
6.4	32.5772	6.4	31.6403
6.5	32.9027	6.5	31.9384
6.6	33.2124	6.6	32.2177
6.7	33.4683	6.7	32.4963
6.8	33.7524	6.8	32.7727
6.9	34.028	6.9	33.0369
7	34.2819	7	33.2865
7.1	34.5338	7.1	33.5254
7.2	34.7873	7.2	33.7598
7.3	35.0217	7.3	33.9795
7.4	35.2541	7.4	34.1923
7.5	35.4837	7.5	34.4137
7.6	35.707	7.6	34.6251
7.7	35.9217	7.7	34.8282
7.8	36.1326	7.8	35.0208
7.9	36.3176	7.9	35.2
8	36.4978	8	35.3641
8.1	36.6861	8.1	35.5173
8.2	36.8665	8.2	35.6647
8.3	37.0319	8.3	35.8264
8.4	37.1874	8.4	35.9776
8.5	37.3386	8.5	36.1258
8.6	37.4716	8.6	36.267
8.7	37.5862	8.7	36.3899
8.8	37.7051	8.8	36.4893
8.9	37.8066	8.9	36.594
9	37.9137	9	36.7089
9.1	38.0174	9.1	36.799
9.2	38.1209	9.2	36.9009
9.3	38.2009	9.3	36.989
9.4	38.2972	9.4	37.0771
9.5	38.3888	9.5	37.1596
9.6	38.4547	9.6	37.2329
9.7	38.5367	9.7	37.3219
9.8	38.6104	9.8	37.4017
9.9	38.6712	9.9	37.4766
10	38.7434	10	37.5441
10.1	38.7997	10.1	37.5957
10.2	38.8615	10.2	37.6557
10.3	38.9072	10.3	37.7044
10.4	38.9647	10.4	37.746
10.5	39.0108	10.5	37.8034
10.6	39.07	10.6	37.8489
10.7	39.1104	10.7	37.9018
10.8	39.1622	10.8	37.9429
10.9	39.2106	10.9	37.9828
11	39.2572	11	38.0317
11.1	39.2862	11.1	38.0749
11.2	39.3276	11.2	38.1199
11.3	39.3584	11.3	38.1616
11.4	39.3978	11.4	38.2008
11.5	39.4374	11.5	38.2334
11.6	39.4687	11.6	38.257
11.7	39.4895	11.7	38.2885
11.8	39.5229	11.8	38.3123
11.9	39.5558	11.9	38.3359
12	39.5757	12	38.3642
12.1	39.6024	12.1	38.3791
12.2	39.616	12.2	38.3993
12.3	39.6353	12.3	38.4228
12.4	39.6638	12.4	38.4378
12.5	39.6892	12.5	38.4505
12.6	39.7113	12.6	38.4728
12.7	39.7343	12.7	38.4937
12.8	39.7639	12.8	38.5144
12.9	39.7742	12.9	38.5326
13	39.7942	13	38.5445
13.1	39.8112	13.1	38.5558
13.2	39.828	13.2	38.5739
13.3	39.8331	13.3	38.5911
13.4	39.8495	13.4	38.61
13.5	39.8571	13.5	38.6264
13.6	39.8719	13.6	38.6423
13.7	39.8844	13.7	38.6586
13.8	39.8974	13.8	38.6725
13.9	39.9083	13.9	38.6828
14	39.9232	14	38.6944
14.1	39.9368	14.1	38.7081
14.2	39.9505	14.2	38.721
14.3	39.9603	14.3	38.7322
14.4	39.9736	14.4	38.7431
14.5	39.9816	14.5	38.7528
14.6	39.9865	14.6	38.7627
14.7	39.9865	14.7	38.771
14.8	39.9911	14.8	38.7739
14.9	39.9955	14.9	38.7765
15	39.9967	15	38.7782
15.1	40.0026	15.1	38.7785
15.2	40.0102	15.2	38.7877
15.3	40.0174	15.3	38.796
15.4	40.0246	15.4	38.8003
15.5	40.0313	15.5	38.8049
15.6	40.0357	15.6	38.8098
15.7	40.0398	15.7	38.8134
15.8	40.0441	15.8	38.815
15.9	40.0516	15.9	38.8171
16	40.0565	16	38.8193
16.1	40.061	16.1	38.824
16.2	40.0656	16.2	38.8259
16.3	40.0673	16.3	38.8274
16.4	40.072	16.4	38.8324
16.5	40.0735	16.5	38.8335
16.6	40.0745	16.6	38.8341
16.7	40.075	16.7	38.8369
16.8	40.079	16.8	38.84
16.9	40.0841	16.9	38.8451
17	40.0888	17	38.8497
17.1	40.0936	17.1	38.8537
17.2	40.102	17.2	38.8613
17.3	40.1064	17.3	38.8664
17.4	40.108	17.4	38.8706
17.5	40.1142	17.5	38.8718
17.6	40.1184	17.6	38.8752
17.7	40.1191	17.7	38.8754
17.8	40.1238	17.8	38.8785
17.9	40.1287	17.9	38.8817
18	40.1294	18	38.884
18.1	40.1261	18.1	38.8849
18.2	40.128	18.2	38.8879
18.3	40.1353	18.3	38.89
18.4	40.1387	18.4	38.8982
18.5	40.1415	18.5	38.9011
18.6	40.1442	18.6	38.9057
18.7	40.1498	18.7	38.9088
18.8	40.1525	18.8	38.9088
18.9	40.152	18.9	38.9123
19	40.1529	19	38.9176
19.1	40.1554	19.1	38.9194
19.2	40.1588	19.2	38.9213
19.3	40.1607	19.3	38.9228
19.4	40.1637	19.4	38.9246
19.5	40.1632	19.5	38.9264
19.6	40.1661	19.6	38.9277
19.7	40.1683	19.7	38.932
19.8	40.1733	19.8	38.9315
19.9	40.1718	19.9	38.9345
20	40.1744	20	38.938
20.1	40.1748	20.1	38.938
20.2	40.1789	20.2	38.9411
20.3	40.1809	20.3	38.9448
20.4	40.1829	20.4	38.9467
20.5	40.1863	20.5	38.9516
20.6	40.1895	20.6	38.9559
20.7	40.1926	20.7	38.9577
20.8	40.1952	20.8	38.9608
20.9	40.1959	20.9	38.9653
21	40.1954	21	38.969
21.1	40.1987	21.1	38.9722
21.2	40.2	21.2	38.9735
21.3	40.2012	21.3	38.974
21.4	40.2029	21.4	38.976
21.5	40.203	21.5	38.9782
21.6	40.2041	21.6	38.98
21.7	40.2066	21.7	38.9828
21.8	40.2085	21.8	38.9854
21.9	40.2115	21.9	38.9889
22	40.2132	22	38.9945
22.1	40.2151	22.1	38.9976
22.2	40.2158	22.2	38.9999
22.3	40.2181	22.3	39.0037
22.4	40.2205	22.4	39.0076
22.5	40.2229	22.5	39.0082
22.6	40.2216	22.6	39.0109
22.7	40.222	22.7	39.0152
22.8	40.2266	22.8	39.0173
22.9	40.2311	22.9	39.0165
23	40.2325	23	39.0157
23.1	40.2342	23.1	39.0163
23.2	40.2338	23.2	39.0128
23.3	40.2359	23.3	39.0114
23.4	40.2387	23.4	39.0115
23.5	40.2427	23.5	39.0119
23.6	40.243	23.6	39.0139
23.7	40.2426	23.7	39.0141
23.8	40.2419	23.8	39.0149
23.9	40.2435	23.9	39.0161
24	40.2447	24	39.0169
24.1	40.2482	24.1	39.0171
24.2	40.254	24.2	39.0186
24.3	40.2601	24.3	39.02
24.4	40.2595	24.4	39.0188
24.5	40.2575	24.5	39.0178
24.6	40.2609	24.6	39.0179
24.7	40.2604	24.7	39.0193
24.8	40.2611	24.8	39.0217
24.9	40.2632	24.9	39.0257
25	40.2678	25	39.0249
25.1	40.2705	25.1	39.0225
25.2	40.273	25.2	39.0229
25.3	40.2758	25.3	39.02
25.4	40.2797	25.4	39.019
25.5	40.2801	25.5	39.0162
25.6	40.2815	25.6	39.0122
25.7	40.285	25.7	39.0128
25.8	40.2842	25.8	39.0117
25.9	40.2825	25.9	39.0119
26	40.285	26	39.0119
26.1	40.2857	26.1	39.015
26.2	40.2877	26.2	39.0179
26.3	40.2852	26.3	39.0156
26.4	40.2882	26.4	39.0143
26.5	40.2878	26.5	39.0115
26.6	40.2882	26.6	39.0098
26.7	40.2894	26.7	39.0095
26.8	40.2887	26.8	39.0108
26.9	40.2864	26.9	39.0091
27	40.2871	27	39.0079
27.1	40.289	27.1	39.0058
27.2	40.291	27.2	39.0072
27.3	40.2923	27.3	39.009
27.4	40.292	27.4	39.0118
27.5	40.2903	27.5	39.0117
27.6	40.2908	27.6	39.0111
27.7	40.2951	27.7	39.0126
27.8	40.2974	27.8	39.012
27.9	40.2988	27.9	39.0115
28	40.3028	28	39.0112
28.1	40.3047	28.1	39.0099
28.2	40.3055	28.2	39.0112
28.3	40.3082	28.3	39.0103
28.4	40.3075	28.4	39.0107
28.5	40.3088	28.5	39.0111
28.6	40.3091	28.6	39.0091
28.7	40.3132	28.7	39.011
28.8	40.3194	28.8	39.0094
28.9	40.3205	28.9	39.0091
29	40.3176	29	39.0111
29.1	40.3194	29.1	39.0133
29.2	40.3186	29.2	39.0116
29.3	40.3195	29.3	39.0145
29.4	40.3166	29.4	39.016
29.5	40.3151	29.5	39.0182
29.6	40.3157	29.6	39.0199
29.7	40.3166	29.7	39.0224
29.8	40.3213	29.8	39.0229
29.9	40.3254	29.9	39.0238
30	40.3248	30	39.0241
30.1	40.3257	30.1	39.0236
30.2	40.3249	30.2	39.0227
30.3	40.3264	30.3	39.0235
30.4	40.3246	30.4	39.0219
30.5	40.3258	30.5	39.0201
30.6	40.3279	30.6	39.0189
30.7	40.3247	30.7	39.0178
30.8	40.3265	30.8	39.0171
30.9	40.3288	30.9	39.0164
31	40.3309	31	39.0132
31.1	40.3283	31.1	39.0121
31.2	40.3274	31.2	39.0158
31.3	40.3253	31.3	39.0163
31.4	40.3248	31.4	39.0204
31.5	40.3234	31.5	39.0222
31.6	40.3238	31.6	39.0227
31.7	40.3291	31.7	39.0248
31.8	40.3289	31.8	39.025
31.9	40.3309	31.9	39.0279
32	40.3345	32	39.0313
32.1	40.3371	32.1	39.0317
32.2	40.3386	32.2	39.0307
32.3	40.3385	32.3	39.0316
32.4	40.3413	32.4	39.0328
32.5	40.3415	32.5	39.0355
32.6	40.3434	32.6	39.0385
32.7	40.3452	32.7	39.0372
32.8	40.346	32.8	39.0382
32.9	40.3447	32.9	39.0375
33	40.3486	33	39.0396
33.1	40.3505	33.1	39.0416
33.2	40.3549	33.2	39.0435
33.3	40.354	33.3	39.0437
33.4	40.3562	33.4	39.0442
33.5	40.3568	33.5	39.0423
33.6	40.3609	33.6	39.041
33.7	40.3623	33.7	39.0428
33.8	40.3621	33.8	39.0417
33.9	40.3619	33.9	39.0421
34	40.3629	34	39.0418
34.1	40.3575	34.1	39.0429
34.2	40.3569	34.2	39.045
34.3	40.3599	34.3	39.0437
34.4	40.3599	34.4	39.043
34.5	40.3636	34.5	39.0427
34.6	40.3648	34.6	39.0418
34.7	40.3656	34.7	39.0465
34.8	40.3659	34.8	39.0448
34.9	40.3636	34.9	39.0454
35	40.3649	35	39.0461
35.1	40.3679	35.1	39.0477
35.2	40.3673	35.2	39.0467
35.3	40.3698	35.3	39.0481
35.4	40.372	35.4	39.0477
35.5	40.3732	35.5	39.0468
35.6	40.3753	35.6	39.0432
35.7	40.374	35.7	39.0416
35.8	40.3743	35.8	39.0405
35.9	40.3697	35.9	39.0409
36	40.3679	36	39.0414
36.1	40.3695	36.1	39.0404
36.2	40.3715	36.2	39.041
36.3	40.3729	36.3	39.043
36.4	40.3726	36.4	39.0403
36.5	40.3743	36.5	39.0397
36.6	40.3763	36.6	39.0436
36.7	40.3791	36.7	39.0442
36.8	40.3797	36.8	39.0484
36.9	40.3815	36.9	39.0475
37	40.3839	37	39.0481
37.1	40.3839	37.1	39.0512
37.2	40.3866	37.2	39.0519
37.3	40.3898	37.3	39.053
37.4	40.3916	37.4	39.0537
37.5	40.3918	37.5	39.0513
37.6	40.3949	37.6	39.0509
37.7	40.3933	37.7	39.051
37.8	40.3919	37.8	39.0507
37.9	40.3939	37.9	39.0521
38	40.3938	38	39.0497
38.1	40.3942	38.1	39.0477
38.2	40.3949	38.2	39.0456
38.3	40.3964	38.3	39.0443
38.4	40.3967	38.4	39.0433
38.5	40.3955	38.5	39.044
38.6	40.3944	38.6	39.0441
38.7	40.3949	38.7	39.0433
38.8	40.3922	38.8	39.0459
38.9	40.3924	38.9	39.0462
39	40.3922	39	39.0479
39.1	40.3938	39.1	39.0481
39.2	40.3923	39.2	39.0482
39.3	40.389	39.3	39.0497
39.4	40.3906	39.4	39.0503
39.5	40.3916	39.5	39.0532
39.6	40.3952	39.6	39.0546
39.7	40.3938	39.7	39.0557
39.8	40.3963	39.8	39.0532
39.9	40.396	39.9	39.0529
40	40.3966	40	39.0551
40.1	40.3989	40.1	39.0578
40.2	40.4014	40.2	39.0552
40.3	40.4015	40.3	39.0546
40.4	40.4033	40.4	39.057
40.5	40.4056	40.5	39.0603
40.6	40.4049	40.6	39.0615
40.7	40.4036	40.7	39.06
40.8	40.4024	40.8	39.0587
40.9	40.4011	40.9	39.0635
41	40.4031	41	39.0635
41.1	40.4036	41.1	39.0644
41.2	40.4049	41.2	39.0652
41.3	40.4061	41.3	39.0686
41.4	40.4075	41.4	39.0711
41.5	40.4094	41.5	39.073
41.6	40.4142	41.6	39.074
41.7	40.4134	41.7	39.0756
41.8	40.4139	41.8	39.0761
41.9	40.4143	41.9	39.0762
42	40.4163	42	39.0784
42.1	40.4156	42.1	39.0788
42.2	40.416	42.2	39.0778
42.3	40.4145	42.3	39.0777
42.4	40.4139	42.4	39.0789
42.5	40.414	42.5	39.0789
42.6	40.4135	42.6	39.0786
42.7	40.4126	42.7	39.0764
42.8	40.4109	42.8	39.076
42.9	40.4143	42.9	39.0741
43	40.415	43	39.0752
43.1	40.4137	43.1	39.0737
43.2	40.4141	43.2	39.0734
43.3	40.4144	43.3	39.0716
43.4	40.415	43.4	39.0716
43.5	40.4187	43.5	39.0694
43.6	40.4189	43.6	39.0709
43.7	40.416	43.7	39.0743
43.8	40.4167	43.8	39.0737
43.9	40.4169	43.9	39.0746
44	40.4192	44	39.0749
44.1	40.4189	44.1	39.0774
44.2	40.4197	44.2	39.0805
44.3	40.4206	44.3	39.0813
44.4	40.4187	44.4	39.0828
44.5	40.4203	44.5	39.0834
44.6	40.4247	44.6	39.0817
44.7	40.4259	44.7	39.0817
44.8	40.4262	44.8	39.0798
44.9	40.4294	44.9	39.0799
45	40.4325	45	39.0808
45.1	40.4363	45.1	39.0786
45.2	40.4352	45.2	39.0793
45.3	40.4379	45.3	39.0788
45.4	40.4388	45.4	39.0784
45.5	40.4385	45.5	39.0784
45.6	40.4375	45.6	39.0756
45.7	40.4366	45.7	39.0761
45.8	40.4365	45.8	39.0773
45.9	40.4362	45.9	39.0805
46	40.437	46	39.082
46.1	40.4395	46.1	39.0792
46.2	40.4386	46.2	39.0756
46.3	40.4388	46.3	39.079
46.4	40.4405	46.4	39.0775
46.5	40.4385	46.5	39.0787
46.6	40.4372	46.6	39.0757
46.7	40.4388	46.7	39.0732
46.8	40.437	46.8	39.0731
46.9	40.4359	46.9	39.0709
47	40.4384	47	39.0676
47.1	40.4382	47.1	39.067
47.2	40.4366	47.2	39.065
47.3	40.4353	47.3	39.0631
47.4	40.4348	47.4	39.0617
47.5	40.4322	47.5	39.0583
47.6	40.4315	47.6	39.0577
47.7	40.4266	47.7	39.0595
47.8	40.4273	47.8	39.0562
47.9	40.4286	47.9	39.0568
48	40.4305	48	39.0553
48.1	40.4313	48.1	39.0523
48.2	40.4335	48.2	39.0519
48.3	40.4345	48.3	39.0547
48.4	40.4369	48.4	39.0535
48.5	40.4378	48.5	39.0538
48.6	40.4393	48.6	39.0559
48.7	40.4374	48.7	39.0596
48.8	40.4377	48.8	39.0611
48.9	40.4389	48.9	39.0642
49	40.4405	49	39.0665
49.1	40.4425	49.1	39.0687
49.2	40.4409	49.2	39.0699
49.3	40.4419	49.3	39.0698
49.4	40.4424	49.4	39.0718
49.5	40.4425	49.5	39.0677
49.6	40.4386	49.6	39.0705
49.7	40.4375	49.7	39.0717
49.8	40.4394	49.8	39.069
49.9	40.4416	49.9	39.0675
50	40.4404	50	39.0674
50.1	40.4361	50.1	39.0673
50.2	40.4398	50.2	39.0668
50.3	40.4412	50.3	39.0644
50.4	40.4414	50.4	39.0659
50.5	40.4412	50.5	39.0663
50.6	40.4419	50.6	39.0648
50.7	40.4423	50.7	39.0643
50.8	40.4434	50.8	39.0628
50.9	40.4436	50.9	39.0666
51	40.4446	51	39.0649
51.1	40.4451	51.1	39.0643
51.2	40.4472	51.2	39.0638
51.3	40.4487	51.3	39.0617
51.4	40.4482	51.4	39.06
51.5	40.4496	51.5	39.0607
51.6	40.4495	51.6	39.0602
51.7	40.4496	51.7	39.0583
51.8	40.4508	51.8	39.0578
51.9	40.4541	51.9	39.0568
52	40.455	52	39.0566
52.1	40.4551	52.1	39.0594
52.2	40.4561	52.2	39.0599
52.3	40.4572	52.3	39.0607
52.4	40.4604	52.4	39.0568
52.5	40.4581	52.5	39.06
52.6	40.4572	52.6	39.0571
52.7	40.4557	52.7	39.0588
52.8	40.4528	52.8	39.0593
52.9	40.455	52.9	39.0594
53	40.4545	53	39.061
53.1	40.4556	53.1	39.061
53.2	40.4549	53.2	39.0587
53.3	40.4597	53.3	39.0596
53.4	40.462	53.4	39.0601
53.5	40.4629	53.5	39.0594
53.6	40.4645	53.6	39.0616
53.7	40.4616	53.7	39.0592
53.8	40.4642	53.8	39.0591
53.9	40.4656	53.9	39.064
54	40.4661	54	39.0647
54.1	40.4648	54.1	39.0675
54.2	40.4654	54.2	39.0684
54.3	40.4677	54.3	39.068
54.4	40.4672	54.4	39.0653
54.5	40.4659	54.5	39.0664
54.6	40.4644	54.6	39.0659
54.7	40.4651	54.7	39.0667
54.8	40.4661	54.8	39.0651
54.9	40.4685	54.9	39.065
55	40.4682	55	39.062
55.1	40.4679	55.1	39.0585
55.2	40.4668	55.2	39.0567
55.3	40.4698	55.3	39.0573
55.4	40.4683	55.4	39.0574
55.5	40.469	55.5	39.058
55.6	40.4683	55.6	39.0596
55.7	40.4669	55.7	39.0605
55.8	40.4689	55.8	39.059
55.9	40.468	55.9	39.0608
56	40.4668	56	39.0637
56.1	40.468	56.1	39.0634
56.2	40.4704	56.2	39.066
56.3	40.4667	56.3	39.0672
56.4	40.4644	56.4	39.0689
56.5	40.4643	56.5	39.0689
56.6	40.4664	56.6	39.067
56.7	40.4657	56.7	39.0693
56.8	40.4628	56.8	39.0698
56.9	40.4608	56.9	39.0669
57	40.4612	57	39.0638
57.1	40.4629	57.1	39.0673
57.2	40.4604	57.2	39.0679
57.3	40.4567	57.3	39.0694
57.4	40.4582	57.4	39.0691
57.5	40.4588	57.5	39.0688
57.6	40.4599	57.6	39.067
57.7	40.4612	57.7	39.0658
57.8	40.4644	57.8	39.065
57.9	40.4639	57.9	39.0646
58	40.4625	58	39.0649
58.1	40.4629	58.1	39.0636
58.2	40.4624	58.2	39.0608
58.3	40.4599	58.3	39.063
58.4	40.4587	58.4	39.0651
58.5	40.456	58.5	39.0693
58.6	40.4563	58.6	39.0669
58.7	40.4595	58.7	39.0641
58.8	40.463	58.8	39.0615
58.9	40.465	58.9	39.0627
59	40.4647	59	39.0645
59.1	40.4674	59.1	39.0633
59.2	40.4656	59.2	39.0659
59.3	40.4656	59.3	39.0701
59.4	40.4614	59.4	39.0704
59.5	40.4604	59.5	39.0707
59.6	40.4593	59.6	39.0715
59.7	40.4602	59.7	39.0717
59.8	40.4629	59.8	39.0745
59.9	40.4628	59.9	39.0739
60	40.4618	60	39.0722
60.1	40.4638	60.1	39.0709
60.2	40.4656	60.2	39.07
60.3	40.4663	60.3	39.0704
60.4	40.4639	60.4	39.0721
60.5	40.465	60.5	39.0736
60.6	40.4637	60.6	39.0756
60.7	40.4672	60.7	39.0768
60.8	40.4666	60.8	39.0784
60.9	40.4695	60.9	39.0784
61	40.4684	61	39.0786
61.1	40.4682	61.1	39.08
61.2	40.4674	61.2	39.0811
61.3	40.4693	61.3	39.0826
61.4	40.4676	61.4	39.0852
61.5	40.4691	61.5	39.0857
61.6	40.4689	61.6	39.0859
61.7	40.4706	61.7	39.0861
61.8	40.4736	61.8	39.085
61.9	40.4725	61.9	39.0852
62	40.4756	62	39.0831
62.1	40.4774	62.1	39.0816
62.2	40.478	62.2	39.0796
62.3	40.4757	62.3	39.0762
62.4	40.4775	62.4	39.0755
62.5	40.4783	62.5	39.0759
62.6	40.4771	62.6	39.077
62.7	40.4761	62.7	39.0785
62.8	40.4753	62.8	39.0799
62.9	40.4761	62.9	39.0825
63	40.4788	63	39.0859
63.1	40.4805	63.1	39.0894
63.2	40.48	63.2	39.0863
63.3	40.4816	63.3	39.0876
63.4	40.4823	63.4	39.0879
63.5	40.4826	63.5	39.0891
63.6	40.4829	63.6	39.0933
63.7	40.4823	63.7	39.0939
63.8	40.4835	63.8	39.0937
63.9	40.4808	63.9	39.0962
64	40.4805	64	39.0978
64.1	40.4819	64.1	39.0983
64.2	40.479	64.2	39.0989
64.3	40.479	64.3	39.0988
64.4	40.482	64.4	39.0964
64.5	40.4857	64.5	39.0976
64.6	40.4885	64.6	39.0966
64.7	40.4899	64.7	39.0958
64.8	40.4882	64.8	39.0974
64.9	40.4854	64.9	39.1013
65	40.4848	65	39.1006
65.1	40.4839	65.1	39.1006
65.2	40.4826	65.2	39.1029
65.3	40.4837	65.3	39.1013
65.4	40.4882	65.4	39.102
65.5	40.4898	65.5	39.1019
65.6	40.4894	65.6	39.0999
65.7	40.4902	65.7	39.0974
65.8	40.492	65.8	39.0996
65.9	40.4929	65.9	39.1
66	40.4931	66	39.1006
66.1	40.495	66.1	39.1002
66.2	40.4949	66.2	39.0993
66.3	40.4936	66.3	39.0994
66.4	40.4901	66.4	39.0997
66.5	40.49	66.5	39.0978
66.6	40.4905	66.6	39.0994
66.7	40.4926	66.7	39.0968
66.8	40.4926	66.8	39.0962
66.9	40.4925	66.9	39.0932
67	40.4899	67	39.0948
67.1	40.4919	67.1	39.0957
67.2	40.4897	67.2	39.0984
67.3	40.4884	67.3	39.1003
67.4	40.4858	67.4	39.099
67.5	40.4867	67.5	39.097
67.6	40.4857	67.6	39.0981
67.7	40.4864	67.7	39.1015
67.8	40.4874	67.8	39.1032
67.9	40.4886	67.9	39.101
68	40.49	68	39.1
68.1	40.4882	68.1	39.1008
68.2	40.488	68.2	39.1004
68.3	40.487	68.3	39.1035
68.4	40.4873	68.4	39.1048
68.5	40.4878	68.5	39.1053
68.6	40.4878	68.6	39.104
68.7	40.4904	68.7	39.103
68.8	40.4889	68.8	39.1053
68.9	40.4915	68.9	39.1024
69	40.4911	69	39.1027
69.1	40.4906	69.1	39.1012
69.2	40.4909	69.2	39.1004
69.3	40.4874	69.3	39.1039
69.4	40.4845	69.4	39.1019
69.5	40.4837	69.5	39.1011
69.6	40.4813	69.6	39.1015
69.7	40.4804	69.7	39.1001
69.8	40.4811	69.8	39.1027
69.9	40.478	69.9	39.1026
70	40.4793	70	39.1018
70.1	40.48	70.1	39.0997
70.2	40.4796	70.2	39.0983
70.3	40.4814	70.3	39.0995
70.4	40.4813	70.4	39.1002
70.5	40.4813	70.5	39.1029
70.6	40.48	70.6	39.1025
70.7	40.4809	70.7	39.1039
70.8	40.4822	70.8	39.1059
70.9	40.4824	70.9	39.1083
71	40.4831	71	39.1077
71.1	40.4811	71.1	39.1084
71.2	40.4835	71.2	39.1102
71.3	40.4859	71.3	39.1077
71.4	40.4858	71.4	39.1089
71.5	40.481	71.5	39.1083
71.6	40.4806	71.6	39.1087
71.7	40.4819	71.7	39.11
71.8	40.4832	71.8	39.1118
71.9	40.4829	71.9	39.1079
72	40.4816	72	39.1056
72.1	40.4809	72.1	39.1063
72.2	40.4805	72.2	39.1051
72.3	40.4774	72.3	39.1092
72.4	40.4762	72.4	39.1129
72.5	40.4797	72.5	39.1147
72.6	40.482	72.6	39.1162
72.7	40.484	72.7	39.1182
72.8	40.4839	72.8	39.122
72.9	40.4815	72.9	39.1206
73	40.4824	73	39.1241
73.1	40.4829	73.1	39.1242
73.2	40.4796	73.2	39.1228
73.3	40.4838	73.3	39.1227
73.4	40.484	73.4	39.1245
73.5	40.4827	73.5	39.1264
73.6	40.4847	73.6	39.1266
73.7	40.4862	73.7	39.1255
73.8	40.4879	73.8	39.123
73.9	40.4854	73.9	39.122
74	40.4815	74	39.1247
74.1	40.4806	74.1	39.1252
74.2	40.4824	74.2	39.1275
74.3	40.4835	74.3	39.1283
74.4	40.4846	74.4	39.128
74.5	40.4859	74.5	39.1272
74.6	40.4861	74.6	39.1256
74.7	40.486	74.7	39.1255
74.8	40.4843	74.8	39.1262
74.9	40.4845	74.9	39.1255
75	40.4816	75	39.1251
75.1	40.4841	75.1	39.1207
75.2	40.4851	75.2	39.1213
75.3	40.4841	75.3	39.1191
75.4	40.4846	75.4	39.1155
75.5	40.4886	75.5	39.1157
75.6	40.49	75.6	39.1182
75.7	40.4914	75.7	39.1175
75.8	40.4926	75.8	39.1198
75.9	40.4918	75.9	39.1194
76	40.495	76	39.1234
76.1	40.4961	76.1	39.1248
76.2	40.4945	76.2	39.1262
76.3	40.4937	76.3	39.1275
76.4	40.4919	76.4	39.1295
76.5	40.4879	76.5	39.1288
76.6	40.4884	76.6	39.1282
76.7	40.491	76.7	39.1274
76.8	40.4888	76.8	39.1257
76.9	40.4866	76.9	39.1255
77	40.487	77	39.1278
77.1	40.4872	77.1	39.1276
77.2	40.4901	77.2	39.1279
77.3	40.4898	77.3	39.1251
77.4	40.489	77.4	39.1263
77.5	40.4889	77.5	39.1235
77.6	40.489	77.6	39.1236
77.7	40.4886	77.7	39.1257
77.8	40.4873	77.8	39.1261
77.9	40.4867	77.9	39.1256
78	40.4843	78	39.1258
78.1	40.4887	78.1	39.1288
78.2	40.4893	78.2	39.1298
78.3	40.4887	78.3	39.1338
78.4	40.4916	78.4	39.1317
78.5	40.495	78.5	39.1288
78.6	40.4964	78.6	39.126
78.7	40.4912	78.7	39.1267
78.8	40.489	78.8	39.124
78.9	40.4875	78.9	39.1223
79	40.4889	79	39.1239
79.1	40.4849	79.1	39.1224
79.2	40.4836	79.2	39.1212
79.3	40.4826	79.3	39.1221
79.4	40.48	79.4	39.1198
79.5	40.4787	79.5	39.1174
79.6	40.4815	79.6	39.1156
79.7	40.4777	79.7	39.1152
79.8	40.4776	79.8	39.1154
79.9	40.4739	79.9	39.114
80	40.4746	80	39.1131
80.1	40.4769	80.1	39.113
80.2	40.4793	80.2	39.1117
80.3	40.4765	80.3	39.1108
80.4	40.4751	80.4	39.1124
80.5	40.4744	80.5	39.1119
80.6	40.4764	80.6	39.1143
80.7	40.4762	80.7	39.1152
80.8	40.4759	80.8	39.1148
80.9	40.4776	80.9	39.1157
81	40.4813	81	39.1168
81.1	40.4839	81.1	39.1193
81.2	40.4818	81.2	39.1224
81.3	40.4785	81.3	39.123
81.4	40.4794	81.4	39.1245
81.5	40.4798	81.5	39.1275
81.6	40.4771	81.6	39.1269
81.7	40.4784	81.7	39.1261
81.8	40.4754	81.8	39.127
81.9	40.4763	81.9	39.1249
82	40.473	82	39.1221
82.1	40.4726	82.1	39.1224
82.2	40.4712	82.2	39.1215
82.3	40.4717	82.3	39.1214
82.4	40.4732	82.4	39.1215
82.5	40.4752	82.5	39.1191
82.6	40.4775	82.6	39.1193
82.7	40.475	82.7	39.1193
82.8	40.4677	82.8	39.1193
82.9	40.469	82.9	39.1197
83	40.471	83	39.1186
83.1	40.4719	83.1	39.1157
83.2	40.4744	83.2	39.1178
83.3	40.4725	83.3	39.1177
83.4	40.4701	83.4	39.1213
83.5	40.4705	83.5	39.123
83.6	40.4729	83.6	39.1258
83.7	40.4747	83.7	39.1257
83.8	40.4764	83.8	39.123
83.9	40.4781	83.9	39.1239
84	40.476	84	39.1244
84.1	40.4785	84.1	39.1261
84.2	40.4742	84.2	39.1261
84.3	40.4761	84.3	39.1244
84.4	40.4771	84.4	39.1228
84.5	40.4746	84.5	39.1252
84.6	40.474	84.6	39.1274
84.7	40.4721	84.7	39.1264
84.8	40.4713	84.8	39.1241
84.9	40.4704	84.9	39.1227
85	40.4724	85	39.1214
85.1	40.471	85.1	39.119
85.2	40.4744	85.2	39.1184
85.3	40.4772	85.3	39.1201
85.4	40.479	85.4	39.1208
85.5	40.4784	85.5	39.1211
85.6	40.4804	85.6	39.1192
85.7	40.4829	85.7	39.1201
85.8	40.4843	85.8	39.1226
85.9	40.4837	85.9	39.124
86	40.4855	86	39.1258
86.1	40.4843	86.1	39.128
86.2	40.4824	86.2	39.1267
86.3	40.4818	86.3	39.1289
86.4	40.4826	86.4	39.1285
86.5	40.4826	86.5	39.1271
86.6	40.4815	86.6	39.1268
86.7	40.4802	86.7	39.1269
86.8	40.476	86.8	39.1271
86.9	40.4761	86.9	39.1284
87	40.477	87	39.1268
87.1	40.4732	87.1	39.1229
87.2	40.469	87.2	39.122
87.3	40.4685	87.3	39.1215
87.4	40.4744	87.4	39.1217
87.5	40.4757	87.5	39.1211
87.6	40.4765	87.6	39.1219
87.7	40.4777	87.7	39.1211
87.8	40.4771	87.8	39.1183
87.9	40.4803	87.9	39.1159
88	40.478	88	39.1153
88.1	40.4823	88.1	39.1158
88.2	40.4808	88.2	39.1111
88.3	40.4808	88.3	39.1128
88.4	40.4802	88.4	39.1115
88.5	40.4796	88.5	39.1097
88.6	40.4799	88.6	39.1079
88.7	40.4813	88.7	39.1075
88.8	40.4788	88.8	39.1062
88.9	40.481	88.9	39.1068
89	40.4801	89	39.106
89.1	40.4803	89.1	39.1086
89.2	40.4796	89.2	39.1095
89.3	40.476	89.3	39.106
89.4	40.4774	89.4	39.1059
89.5	40.4796	89.5	39.1043
89.6	40.4799	89.6	39.1019
89.7	40.4805	89.7	39.0984
89.8	40.4805	89.8	39.0981
89.9	40.48	89.9	39.0983
90	40.4758	90	39.0982
90.1	40.4765	90.1	39.0988
90.2	40.4737	90.2	39.097
90.3	40.475	90.3	39.0941
90.4	40.4757	90.4	39.0936
90.5	40.4762	90.5	39.0949
90.6	40.4787	90.6	39.0936
90.7	40.4773	90.7	39.0905
90.8	40.48	90.8	39.0921
90.9	40.4862	90.9	39.0948
91	40.4879	91	39.0963
91.1	40.4874	91.1	39.0978
91.2	40.4884	91.2	39.1009
91.3	40.4883	91.3	39.1006
91.4	40.488	91.4	39.0989
91.5	40.4899	91.5	39.099
91.6	40.4896	91.6	39.1012
91.7	40.4882	91.7	39.1042
91.8	40.4862	91.8	39.1034
91.9	40.4865	91.9	39.1003
92	40.4885	92	39.1003
92.1	40.4837	92.1	39.1017
92.2	40.4835	92.2	39.1013
92.3	40.4866	92.3	39.1009
92.4	40.4859	92.4	39.0984
92.5	40.4853	92.5	39.0977
92.6	40.4866	92.6	39.1008
92.7	40.4904	92.7	39.1022
92.8	40.4895	92.8	39.1007
92.9	40.4967	92.9	39.1013
93	40.4971	93	39.1005
93.1	40.4954	93.1	39.0993
93.2	40.4961	93.2	39.1004
93.3	40.4994	93.3	39.1024
93.4	40.4982	93.4	39.1054
93.5	40.4931	93.5	39.1061
93.6	40.4931	93.6	39.1085
93.7	40.4933	93.7	39.1077
93.8	40.4932	93.8	39.1097
93.9	40.493	93.9	39.1118
94	40.4936	94	39.1138
94.1	40.4935	94.1	39.1132
94.2	40.4931	94.2	39.1143
94.3	40.4927	94.3	39.112
94.4	40.4905	94.4	39.1104
94.5	40.4904	94.5	39.1113
94.6	40.4897	94.6	39.112
94.7	40.4903	94.7	39.1107
94.8	40.4934	94.8	39.1112
94.9	40.4981	94.9	39.1143
95	40.5008	95	39.1132
95.1	40.5004	95.1	39.116
95.2	40.5004	95.2	39.1148
95.3	40.5018	95.3	39.1141
95.4	40.5045	95.4	39.1165
95.5	40.5054	95.5	39.118
95.6	40.5076	95.6	39.1162
95.7	40.507	95.7	39.1161
95.8	40.5033	95.8	39.1155
95.9	40.5046	95.9	39.1144
96	40.5051	96	39.1159
96.1	40.5056	96.1	39.1155
96.2	40.5057	96.2	39.1131
96.3	40.508	96.3	39.1132
96.4	40.5049	96.4	39.1148
96.5	40.5004	96.5	39.1157
96.6	40.4991	96.6	39.1117
96.7	40.4996	96.7	39.1122
96.8	40.4998	96.8	39.115
96.9	40.4976	96.9	39.1159
97	40.4933	97	39.1155
97.1	40.4927	97.1	39.116
97.2	40.4938	97.2	39.1153
97.3	40.4944	97.3	39.1147
97.4	40.493	97.4	39.1162
97.5	40.4915	97.5	39.1157
97.6	40.4907	97.6	39.1147
97.7	40.4927	97.7	39.1126
97.8	40.4972	97.8	39.1102
97.9	40.4972	97.9	39.109
98	40.4936	98	39.1098
98.1	40.4926	98.1	39.1083
98.2	40.4983	98.2	39.1061
98.3	40.4997	98.3	39.1066
98.4	40.5005	98.4	39.1086
98.5	40.5006	98.5	39.1106
98.6	40.5036	98.6	39.1104
98.7	40.5019	98.7	39.1072
98.8	40.499	98.8	39.109
98.9	40.5004	98.9	39.1096
99	40.4985	99	39.1101
99.1	40.4997	99.1	39.1124
99.2	40.4974	99.2	39.1149
99.3	40.4991	99.3	39.1161
99.4	40.4978	99.4	39.1151
99.5	40.4997	99.5	39.1141
99.6	40.5002	99.6	39.1141
99.7	40.4992	99.7	39.1131
99.8	40.4996	99.8	39.1129
99.9	40.5003	99.9	39.1122
100	40.5004	100	39.1127
100.1	40.4973	100.1	39.1097
100.2	40.4992	100.2	39.108
100.3	40.4987	100.3	39.1065
100.4	40.4978	100.4	39.1112
100.5	40.4972	100.5	39.1137
100.6	40.498	100.6	39.1153
100.7	40.4968	100.7	39.1146
100.8	40.4957	100.8	39.1163
100.9	40.495	100.9	39.1167
101	40.4922	101	39.1112
101.1	40.4923	101.1	39.1108
101.2	40.49	101.2	39.111
101.3	40.4888	101.3	39.1112
101.4	40.4865	101.4	39.1128
101.5	40.4838	101.5	39.1125
101.6	40.4832	101.6	39.1096
101.7	40.4814	101.7	39.1112
101.8	40.4817	101.8	39.1136
101.9	40.4821	101.9	39.117
102	40.4796	102	39.1198
102.1	40.4791	102.1	39.1199
102.2	40.48	102.2	39.1192
102.3	40.4774	102.3	39.1193
102.4	40.4791	102.4	39.1197
102.5	40.4796	102.5	39.123
102.6	40.4819	102.6	39.1206
102.7	40.4821	102.7	39.1235
102.8	40.4826	102.8	39.1221
102.9	40.4833	102.9	39.1179
103	40.4851	103	39.1145
103.1	40.4847	103.1	39.1132
103.2	40.4853	103.2	39.1091
103.3	40.4836	103.3	39.1113
103.4	40.4846	103.4	39.1104
103.5	40.4847	103.5	39.1092
103.6	40.4859	103.6	39.1101
103.7	40.4839	103.7	39.1128
103.8	40.4847	103.8	39.1121
103.9	40.4805	103.9	39.1143
104	40.4804	104	39.1143
104.1	40.4817	104.1	39.113
104.2	40.4802	104.2	39.1142
104.3	40.4791	104.3	39.1143
104.4	40.4808	104.4	39.1121
104.5	40.4799	104.5	39.1128
104.6	40.482	104.6	39.1147
104.7	40.4834	104.7	39.1151
104.8	40.4821	104.8	39.1137
104.9	40.4831	104.9	39.1123
105	40.4834	105	39.1145
105.1	40.4823	105.1	39.1157
105.2	40.4832	105.2	39.1158
105.3	40.4867	105.3	39.1149
105.4	40.4875	105.4	39.1134
105.5	40.4889	105.5	39.1117
105.6	40.4902	105.6	39.1118
105.7	40.4897	105.7	39.1142
105.8	40.4877	105.8	39.1114
105.9	40.4868	105.9	39.1101
106	40.4865	106	39.109
106.1	40.4884	106.1	39.1074
106.2	40.4912	106.2	39.1101
106.3	40.4908	106.3	39.112
106.4	40.4886	106.4	39.1133
106.5	40.4877	106.5	39.1127
106.6	40.4922	106.6	39.11
106.7	40.4913	106.7	39.1084
106.8	40.4925	106.8	39.1093
106.9	40.4943	106.9	39.1098
107	40.4913	107	39.11
107.1	40.4921	107.1	39.1139
107.2	40.492	107.2	39.1133
107.3	40.4962	107.3	39.1103
107.4	40.4965	107.4	39.1105
107.5	40.4985	107.5	39.1094
107.6	40.4995	107.6	39.108
107.7	40.5004	107.7	39.1101
107.8	40.5015	107.8	39.1106
107.9	40.5025	107.9	39.1095
108	40.5031	108	39.1075
108.1	40.504	108.1	39.1065
108.2	40.5026	108.2	39.1049
108.3	40.502	108.3	39.1086
108.4	40.5084	108.4	39.1104
108.5	40.5057	108.5	39.1089
108.6	40.5078	108.6	39.105
108.7	40.5075	108.7	39.1046
108.8	40.508	108.8	39.1031
108.9	40.506	108.9	39.1052
109	40.5056	109	39.1049
109.1	40.5055	109.1	39.1096
109.2	40.506	109.2	39.113
109.3	40.508	109.3	39.1142
109.4	40.5058	109.4	39.1121
109.5	40.5019	109.5	39.1116
109.6	40.5053	109.6	39.1079
109.7	40.5049	109.7	39.1082
109.8	40.5087	109.8	39.108
109.9	40.5091	109.9	39.1076
110	40.5113	110	39.1063
110.1	40.5104	110.1	39.1081
110.2	40.5094	110.2	39.1078
110.3	40.5108	110.3	39.1054
110.4	40.51	110.4	39.1027
110.5	40.51	110.5	39.1017
110.6	40.5112	110.6	39.1
110.7	40.512	110.7	39.1005
110.8	40.511	110.8	39.1001
110.9	40.5121	110.9	39.102
111	40.5107	111	39.0985
111.1	40.5089	111.1	39.0963
111.2	40.5078	111.2	39.0963
111.3	40.5047	111.3	39.0919
111.4	40.5009	111.4	39.0894
111.5	40.4989	111.5	39.089
111.6	40.4978	111.6	39.088
111.7	40.4969	111.7	39.0872
111.8	40.498	111.8	39.0825
111.9	40.4989	111.9	39.083
112	40.4997	112	39.0836
112.1	40.4974	112.1	39.0841
112.2	40.4951	112.2	39.0855
112.3	40.4925	112.3	39.0826
112.4	40.4911	112.4	39.0817
112.5	40.492	112.5	39.0829
112.6	40.4965	112.6	39.0856
112.7	40.4936	112.7	39.0886
112.8	40.493	112.8	39.0875
112.9	40.4929	112.9	39.0866
113	40.4916	113	39.0869
113.1	40.4945	113.1	39.0872
113.2	40.4936	113.2	39.0831
113.3	40.4908	113.3	39.0838
113.4	40.4882	113.4	39.085
113.5	40.49	113.5	39.0857
113.6	40.4891	113.6	39.0842
113.7	40.4874	113.7	39.0837
113.8	40.4849	113.8	39.0812
113.9	40.485	113.9	39.0822
114	40.4856	114	39.083
114.1	40.4866	114.1	39.0854
114.2	40.4852	114.2	39.0848
114.3	40.4847	114.3	39.087
114.4	40.4864	114.4	39.0851
114.5	40.4834	114.5	39.0837
114.6	40.4836	114.6	39.0844
114.7	40.4835	114.7	39.0854
114.8	40.4837	114.8	39.0868
114.9	40.483	114.9	39.0889
115	40.482	115	39.0847
115.1	40.4803	115.1	39.0865
115.2	40.4792	115.2	39.0834
115.3	40.4815	115.3	39.0827
115.4	40.477	115.4	39.0857
115.5	40.4792	115.5	39.0873
115.6	40.483	115.6	39.0884
115.7	40.4816	115.7	39.0913
115.8	40.4809	115.8	39.0904
115.9	40.4806	115.9	39.0871
116	40.4792	116	39.09
116.1	40.478	116.1	39.0917
116.2	40.4768	116.2	39.091
116.3	40.4792	116.3	39.0912
116.4	40.4773	116.4	39.093
116.5	40.4786	116.5	39.097
116.6	40.4789	116.6	39.0996
116.7	40.4782	116.7	39.0995
116.8	40.4776	116.8	39.0996
116.9	40.4754	116.9	39.101
117	40.477	117	39.1017
117.1	40.4769	117.1	39.1043
117.2	40.4784	117.2	39.1056
117.3	40.4798	117.3	39.1001
117.4	40.4796	117.4	39.1024
117.5	40.4802	117.5	39.1056
117.6	40.4836	117.6	39.105
117.7	40.4854	117.7	39.105
117.8	40.4836	117.8	39.1063
117.9	40.4839	117.9	39.1082
118	40.4804	118	39.1115
118.1	40.474	118.1	39.1128
118.2	40.4769	118.2	39.1131
118.3	40.4774	118.3	39.1126
118.4	40.4778	118.4	39.1149
118.5	40.4779	118.5	39.1183
118.6	40.4798	118.6	39.1189
118.7	40.477	118.7	39.1193
118.8	40.4775	118.8	39.1174
118.9	40.4785	118.9	39.1192
119	40.4776	119	39.121
119.1	40.4772	119.1	39.1201
119.2	40.4746	119.2	39.1187
119.3	40.4748	119.3	39.1226
119.4	40.4757	119.4	39.1256
119.5	40.4777	119.5	39.1242
119.6	40.475	119.6	39.1212
119.7	40.4742	119.7	39.1218
119.8	40.4772	119.8	39.1233
119.9	40.48	119.9	39.1245
120	40.4808	120	39.1251
120.1	40.4773	120.1	39.1236
120.2	40.4749	120.2	39.1212
120.3	40.4754	120.3	39.1214
120.4	40.4751	120.4	39.118
120.5	40.475	120.5	39.1192
120.6	40.4754	120.6	39.1214
120.7	40.4751	120.7	39.1256
120.8	40.4748	120.8	39.129
120.9	40.474	120.9	39.1314
121	40.4755	121	39.1322
121.1	40.4769	121.1	39.1356
121.2	40.4786	121.2	39.1379
121.3	40.4785	121.3	39.1389
121.4	40.4804	121.4	39.1368
121.5	40.4804	121.5	39.1358
121.6	40.4787	121.6	39.1336
121.7	40.4761	121.7	39.1308
121.8	40.474	121.8	39.1309
121.9	40.4757	121.9	39.1354
122	40.4753	122	39.1374
122.1	40.4754	122.1	39.1343
122.2	40.4764	122.2	39.1328
122.3	40.4773	122.3	39.1329
122.4	40.4775	122.4	39.132
122.5	40.4795	122.5	39.1309
122.6	40.4781	122.6	39.1308
122.7	40.4773	122.7	39.1294
122.8	40.4748	122.8	39.1269
122.9	40.4733	122.9	39.1247
123	40.4718	123	39.1217
123.1	40.4694	123.1	39.1178
123.2	40.4728	123.2	39.1179
123.3	40.4723	123.3	39.1144
123.4	40.4707	123.4	39.1166
123.5	40.4722	123.5	39.1176
123.6	40.4723	123.6	39.1162
123.7	40.4686	123.7	39.1166
123.8	40.4672	123.8	39.1191
123.9	40.4704	123.9	39.1162
124	40.4705	124	39.1161
124.1	40.4754	124.1	39.114
124.2	40.4807	124.2	39.1141
124.3	40.4778	124.3	39.1154
124.4	40.476	124.4	39.1175
124.5	40.4759	124.5	39.1164
124.6	40.4768	124.6	39.1151
124.7	40.4767	124.7	39.1147
124.8	40.4757	124.8	39.1131
124.9	40.476	124.9	39.1112
125	40.4781	125	39.1094
125.1	40.481	125.1	39.1088
125.2	40.4788	125.2	39.1089
125.3	40.4788	125.3	39.1075
125.4	40.4799	125.4	39.108
125.5	40.4806	125.5	39.1075
125.6	40.479	125.6	39.1099
125.7	40.4777	125.7	39.112
125.8	40.4783	125.8	39.1137
125.9	40.4776	125.9	39.1139
126	40.4775	126	39.1142
126.1	40.4753	126.1	39.1131
126.2	40.4777	126.2	39.1133
126.3	40.4756	126.3	39.1135
126.4	40.476	126.4	39.1102
126.5	40.4764	126.5	39.1097
126.6	40.4774	126.6	39.1062
126.7	40.4772	126.7	39.105
126.8	40.4754	126.8	39.1012
126.9	40.4759	126.9	39.0994
127	40.4762	127	39.0989
127.1	40.4743	127.1	39.0974
127.2	40.4728	127.2	39.0941
127.3	40.4723	127.3	39.0932
127.4	40.4746	127.4	39.0949
127.5	40.4726	127.5	39.0947
127.6	40.4726	127.6	39.0935
127.7	40.4737	127.7	39.0947
127.8	40.4727	127.8	39.0953
127.9	40.4737	127.9	39.0938
128	40.4726	128	39.0898
128.1	40.4703	128.1	39.0891
128.2	40.4694	128.2	39.09
128.3	40.4667	128.3	39.0883
128.4	40.4653	128.4	39.0899
128.5	40.466	128.5	39.0911
128.6	40.4665	128.6	39.0926
128.7	40.4665	128.7	39.0931
128.8	40.4683	128.8	39.0944
128.9	40.4699	128.9	39.0967
129	40.4673	129	39.0973
129.1	40.4686	129.1	39.0995
129.2	40.4707	129.2	39.1021
129.3	40.4696	129.3	39.1
129.4	40.4692	129.4	39.0973
129.5	40.4692	129.5	39.0964
129.6	40.4698	129.6	39.0958
129.7	40.4694	129.7	39.0952
129.8	40.4722	129.8	39.0963
129.9	40.4742	129.9	39.0956
130	40.4726	130	39.0968
130.1	40.4722	130.1	39.0973
130.2	40.4707	130.2	39.0991
130.3	40.4712	130.3	39.0973
130.4	40.4736	130.4	39.0938
130.5	40.4751	130.5	39.0899
130.6	40.4755	130.6	39.0924
130.7	40.4729	130.7	39.0934
130.8	40.4706	130.8	39.0914
130.9	40.4731	130.9	39.0906
131	40.4717	131	39.0907
131.1	40.4696	131.1	39.0927
131.2	40.4657	131.2	39.0925
131.3	40.465	131.3	39.0914
131.4	40.4665	131.4	39.0924
131.5	40.4646	131.5	39.0883
131.6	40.4621	131.6	39.0873
131.7	40.4597	131.7	39.0864
131.8	40.4625	131.8	39.0846
131.9	40.4639	131.9	39.0819
132	40.4639	132	39.08
132.1	40.4628	132.1	39.0792
132.2	40.4626	132.2	39.0772
132.3	40.4612	132.3	39.0783
132.4	40.4639	132.4	39.0791
132.5	40.4676	132.5	39.0819
132.6	40.4701	132.6	39.0836
132.7	40.4702	132.7	39.085
132.8	40.4701	132.8	39.0865
132.9	40.4719	132.9	39.0896
133	40.4718	133	39.0898
133.1	40.473	133.1	39.0891
133.2	40.4725	133.2	39.0905
133.3	40.4737	133.3	39.0901
133.4	40.474	133.4	39.0893
133.5	40.4746	133.5	39.0877
133.6	40.4748	133.6	39.0875
133.7	40.4761	133.7	39.0888
133.8	40.473	133.8	39.0875
133.9	40.4746	133.9	39.0886
134	40.4752	134	39.0905
134.1	40.474	134.1	39.0898
134.2	40.4757	134.2	39.0881
134.3	40.4761	134.3	39.087
134.4	40.4755	134.4	39.0879
134.5	40.4754	134.5	39.0856
134.6	40.4742	134.6	39.0849
134.7	40.4727	134.7	39.0858
134.8	40.4737	134.8	39.0864
134.9	40.4715	134.9	39.0848
135	40.4724	135	39.0814
135.1	40.4766	135.1	39.0787
135.2	40.4765	135.2	39.0778
135.3	40.476	135.3	39.0782
135.4	40.4752	135.4	39.0793
135.5	40.474	135.5	39.0826
135.6	40.4757	135.6	39.0844
135.7	40.4779	135.7	39.0824
135.8	40.48	135.8	39.082
135.9	40.4787	135.9	39.0805
136	40.4768	136	39.0801
136.1	40.4735	136.1	39.0776
136.2	40.4703	136.2	39.0776
136.3	40.4677	136.3	39.0774
136.4	40.4669	136.4	39.0774
136.5	40.4659	136.5	39.0793
136.6	40.4632	136.6	39.0798
136.7	40.4643	136.7	39.0784
136.8	40.4651	136.8	39.0796
136.9	40.4654	136.9	39.0805
137	40.4643	137	39.0816
137.1	40.4643	137.1	39.0835
137.2	40.4639	137.2	39.0805
137.3	40.4669	137.3	39.0806
137.4	40.4687	137.4	39.0835
137.5	40.4698	137.5	39.084
137.6	40.4704	137.6	39.0876
137.7	40.472	137.7	39.0861
137.8	40.4755	137.8	39.0846
137.9	40.4752	137.9	39.0863
138	40.4727	138	39.0884
138.1	40.4698	138.1	39.0881
138.2	40.469	138.2	39.0881
138.3	40.4694	138.3	39.0889
138.4	40.4671	138.4	39.0886
138.5	40.4669	138.5	39.0892
138.6	40.4596	138.6	39.0853
138.7	40.4571	138.7	39.0844
138.8	40.4576	138.8	39.0834
138.9	40.4584	138.9	39.0839
139	40.4599	139	39.0832
139.1	40.4596	139.1	39.0811
139.2	40.4576	139.2	39.0804
139.3	40.4604	139.3	39.0795
139.4	40.4611	139.4	39.0828
139.5	40.4619	139.5	39.0854
139.6	40.4603	139.6	39.0846
139.7	40.4601	139.7	39.0855
139.8	40.4607	139.8	39.0856
139.9	40.4655	139.9	39.0896
140	40.4664	140	39.0896
140.1	40.4624	140.1	39.0897
140.2	40.4643	140.2	39.0908
140.3	40.4653	140.3	39.0928
140.4	40.463	140.4	39.0927
140.5	40.4636	140.5	39.0941
140.6	40.4655	140.6	39.093
140.7	40.4644	140.7	39.0934
140.8	40.4636	140.8	39.0921
140.9	40.4627	140.9	39.0922
141	40.4604	141	39.0935
141.1	40.4582	141.1	39.0958
141.2	40.4544	141.2	39.0989
141.3	40.4525	141.3	39.0986
141.4	40.4508	141.4	39.0973
141.5	40.4517	141.5	39.0954
141.6	40.4544	141.6	39.0934
141.7	40.4533	141.7	39.0947
141.8	40.4503	141.8	39.0935
141.9	40.4496	141.9	39.0927
142	40.4487	142	39.0943
142.1	40.4487	142.1	39.0941
142.2	40.4505	142.2	39.0948
142.3	40.4534	142.3	39.0934
142.4	40.4548	142.4	39.0907
142.5	40.456	142.5	39.092
142.6	40.4546	142.6	39.0925
142.7	40.4575	142.7	39.0945
142.8	40.4571	142.8	39.0952
142.9	40.4611	142.9	39.0935
143	40.4621	143	39.0938
143.1	40.4637	143.1	39.0908
143.2	40.4649	143.2	39.0866
143.3	40.4661	143.3	39.0914
143.4	40.4665	143.4	39.0906
143.5	40.4672	143.5	39.0883
143.6	40.4633	143.6	39.0874
143.7	40.4633	143.7	39.0884
143.8	40.4628	143.8	39.0903
143.9	40.4605	143.9	39.0905
144	40.4581	144	39.0897
144.1	40.4582	144.1	39.091
144.2	40.46	144.2	39.0936
144.3	40.4628	144.3	39.093
144.4	40.4634	144.4	39.0924
144.5	40.4656	144.5	39.091
144.6	40.4654	144.6	39.0911
144.7	40.467	144.7	39.094
144.8	40.4678	144.8	39.0948
144.9	40.4658	144.9	39.0953
145	40.4646	145	39.0933
145.1	40.4639	145.1	39.0896
145.2	40.464	145.2	39.0901
145.3	40.4647	145.3	39.0899
145.4	40.4627	145.4	39.092
145.5	40.463	145.5	39.0887
145.6	40.4635	145.6	39.0862
145.7	40.4601	145.7	39.0859
145.8	40.4607	145.8	39.0862
145.9	40.4581	145.9	39.0857
146	40.4557	146	39.0832
146.1	40.4568	146.1	39.0827
146.2	40.4621	146.2	39.0814
146.3	40.4621	146.3	39.0798
146.4	40.4626	146.4	39.0805
146.5	40.4658	146.5	39.0818
146.6	40.466	146.6	39.0811
146.7	40.4665	146.7	39.0829
146.8	40.4676	146.8	39.0846
146.9	40.4686	146.9	39.0845
147	40.4694	147	39.0812
147.1	40.4728	147.1	39.0791
147.2	40.4722	147.2	39.0779
147.3	40.4729	147.3	39.0774
147.4	40.4758	147.4	39.0773
147.5	40.4778	147.5	39.0778
147.6	40.4784	147.6	39.0803
147.7	40.4775	147.7	39.0847
147.8	40.4797	147.8	39.0828
147.9	40.4786	147.9	39.0855
148	40.4806	148	39.0881
148.1	40.4804	148.1	39.0862
148.2	40.4807	148.2	39.0823
148.3	40.4797	148.3	39.0812
148.4	40.4803	148.4	39.0812
148.5	40.4818	148.5	39.0815
148.6	40.4806	148.6	39.0797
148.7	40.4825	148.7	39.0789
148.8	40.4802	148.8	39.0755
148.9	40.4786	148.9	39.076
149	40.474	149	39.0753
149.1	40.4738	149.1	39.0711
149.2	40.4731	149.2	39.0718
149.3	40.4724	149.3	39.0741
149.4	40.4707	149.4	39.0735
149.5	40.4681	149.5	39.0743
149.6	40.4682	149.6	39.0734
149.7	40.4707	149.7	39.0766
149.8	40.4697	149.8	39.0779
149.9	40.4698	149.9	39.0738
150	40.4707	150	39.0724
150.1	40.4734	150.1	39.0717
150.2	40.473	150.2	39.0679
150.3	40.4733	150.3	39.0641
150.4	40.4712	150.4	39.0663
150.5	40.4712	150.5	39.0672
150.6	40.4688	150.6	39.0683
150.7	40.4683	150.7	39.068
150.8	40.4707	150.8	39.0687
150.9	40.472	150.9	39.07
151	40.4725	151	39.0701
151.1	40.4733	151.1	39.0691
151.2	40.4717	151.2	39.0686
151.3	40.469	151.3	39.0673
151.4	40.4685	151.4	39.067
151.5	40.4686	151.5	39.0639
151.6	40.4681	151.6	39.0637
151.7	40.4667	151.7	39.0592
151.8	40.4666	151.8	39.0568
151.9	40.4664	151.9	39.055
152	40.4663	152	39.0546
152.1	40.4691	152.1	39.0519
152.2	40.4663	152.2	39.0497
152.3	40.4627	152.3	39.0498
152.4	40.4632	152.4	39.05
152.5	40.4586	152.5	39.0485
152.6	40.4574	152.6	39.047
152.7	40.459	152.7	39.0467
152.8	40.4582	152.8	39.0463
152.9	40.4571	152.9	39.0465
153	40.4556	153	39.0473
153.1	40.4533	153.1	39.0497
153.2	40.4516	153.2	39.0536
153.3	40.4553	153.3	39.0556
153.4	40.4562	153.4	39.0531
153.5	40.456	153.5	39.0535
153.6	40.4555	153.6	39.0554
153.7	40.4541	153.7	39.0552
153.8	40.453	153.8	39.0526
153.9	40.45	153.9	39.0539
154	40.4521	154	39.0513
154.1	40.4513	154.1	39.0499
154.2	40.4511	154.2	39.0486
154.3	40.4536	154.3	39.05
154.4	40.4537	154.4	39.0532
154.5	40.452	154.5	39.0519
154.6	40.4519	154.6	39.0508
154.7	40.4521	154.7	39.0503
154.8	40.4532	154.8	39.0532
154.9	40.4583	154.9	39.056
155	40.4608	155	39.0564
155.1	40.4619	155.1	39.054
155.2	40.4604	155.2	39.0551
155.3	40.4577	155.3	39.0532
155.4	40.4584	155.4	39.0508
155.5	40.4613	155.5	39.0497
155.6	40.4633	155.6	39.0508
155.7	40.4629	155.7	39.052
155.8	40.4625	155.8	39.0501
155.9	40.4673	155.9	39.0472
156	40.4711	156	39.0486
156.1	40.4737	156.1	39.0508
156.2	40.4742	156.2	39.0503
156.3	40.4743	156.3	39.0516
156.4	40.4745	156.4	39.0542
156.5	40.4736	156.5	39.0518
156.6	40.4722	156.6	39.0511
156.7	40.4733	156.7	39.0531
156.8	40.4729	156.8	39.051
156.9	40.4724	156.9	39.0504
157	40.4688	157	39.0509
157.1	40.4691	157.1	39.0485
157.2	40.4675	157.2	39.0496
157.3	40.4679	157.3	39.0503
157.4	40.4696	157.4	39.0511
157.5	40.4694	157.5	39.0515
157.6	40.47	157.6	39.0512
157.7	40.4705	157.7	39.0545
157.8	40.4694	157.8	39.0593
157.9	40.4711	157.9	39.0626
158	40.4704	158	39.0653
158.1	40.4731	158.1	39.0652
158.2	40.4719	158.2	39.0677
158.3	40.4742	158.3	39.0717
158.4	40.475	158.4	39.071
158.5	40.4729	158.5	39.0715
158.6	40.475	158.6	39.0713
158.7	40.4735	158.7	39.0744
158.8	40.4725	158.8	39.074
158.9	40.471	158.9	39.0715
159	40.4727	159	39.0718
159.1	40.4739	159.1	39.0722
159.2	40.4746	159.2	39.0712
159.3	40.4745	159.3	39.0676
159.4	40.4737	159.4	39.0662
159.5	40.473	159.5	39.0691
159.6	40.4714	159.6	39.0687
159.7	40.4707	159.7	39.0664
159.8	40.4684	159.8	39.0682
[truncated: 20,962 more rows]
