# Supplementary material for: ARL3 activation requires the co-GEF BART and effector-mediated turnover
Source: eLife. 2021 Jan 13;10:e64624. doi: 10.7554/eLife.64624 (PMC7817177; doi:10.7554/eLife.64624)
Supplement: Figure 5—source data 1. [file elife-64624-fig5-data1.xlsx]

## Sheet: Result sheet
Method name: Method 1
Application: SparkControl				V2.3
Device: Spark				Serial number: 1805010789
Firmware:				LUM:V5.2.3|ABS:V4.3.2|ABS_MEX:V5.0.7|MTP:V13.1.5|FLUOR:V5.1.3|FLUOR_FP:V5.0.2|FLUOR_BOTTOM:V5.0.2|FLUOR_MEM:V5.0.7|FLUOR_MEX:V5.0.7
Date:				2019-10-04
Time:				7:30 PM
System				WIN-ES3VQR1Q0JI
User				WIN-ES3VQR1Q0JI\beatson
Plate				[COR96fb half area] - Corning 96 Flat Black Cat. No.: 3694
Lid lifter				No lid
Humidity Cassette				No humidity cassette
Smooth mode				Not selected
List of actions in this measurement script:
Plate
	Kinetic
		Fluorescence polarisation				Label 1
Name				COR96fb half area
Plate layout
Plate area				A1;C6-C7
Mode	Kinetic
Kinetic duration				01:00:00	hh:mm:ss
Interval time				00:00:03	hh:mm:ss
Mode	Fluorescence polarisation
Name	Label 1
Excitation				Monochromator
Excitation wavelength				366	nm
Excitation bandwidth				20	nm
Emission				Monochromator
Emission wavelength				450	nm
Emission bandwidth				20	nm
Gain				117	Manual
Mirror				Automatic (50% Mirror)
Number of flashes				30
Integration time				40	µs
Lag time				0	µs
Settle time				0	ms
Z-Position				18474	µm
Z-Position mode				Manual
G Factor				1.793	Manual
Measurement Blank				BL1
Part of Plate				A1;C6-C7
Start Time				2019-10-04 19:08:07
Label 1 [mP]
Cycle Nr.	Time [s]	Temp. [°C]	A1	A2	A3	A4	A5	A6	A7	A8	A9	A10	A11	A12	B1	B2	B3	B4	B5	B6	B7	B8	B9	B10	B11	B12	C1	C2	C3	C4	C5	C6	C7	C8	C9	C10	C11	C12	D1	D2	D3	D4	D5	D6	D7	D8	D9	D10	D11
1	0	30.1	BL1																												0	213	296
2	6.191	30	BL1																												6.191	212	286
3	12.367	30	BL1																												12.367	208	292
4	18.538	30	BL1																												18.538	206	291
5	24.724	30	BL1																												24.724	204	294
6	30.908	30	BL1																												30.908	201	288
7	37.091	29.9	BL1																												37.091	185	283
8	43.267	29.9	BL1																												43.267	188	290
9	49.453	29.9	BL1																												49.453	177	288
10	55.624	29.9	BL1																												55.624	174	286
11	61.808	29.8	BL1																												61.808	169	287
12	67.993	29.8	BL1																												67.993	159	295
13	74.193	29.7	BL1																												74.193	153	282
14	80.373	29.7	BL1																												80.373	148	285
15	86.562	29.7	BL1																												86.562	147	278
16	92.746	29.6	BL1																												92.746	144	278
17	98.933	29.6	BL1																												98.933	136	280
18	105.117	29.6	BL1																												105.117	130	283
19	111.319	29.5	BL1																												111.319	135	277
20	117.488	29.5	BL1																												117.488	127	286
21	123.67	29.5	BL1																												123.67	122	279
22	129.849	29.5	BL1																												129.849	116	286
23	136.036	29.5	BL1																												136.036	111	279
24	142.221	29.4	BL1																												142.221	115	274
25	148.405	29.4	BL1																												148.405	108	276
26	154.593	29.4	BL1																												154.593	94	278
27	160.77	29.4	BL1																												160.77	101	278
28	166.954	29.4	BL1																												166.954	91	265
29	173.149	29.4	BL1																												173.149	99	274
30	179.341	29.4	BL1																												179.341	85	277
31	185.521	29.4	BL1																												185.521	87	275
32	191.71	29.4	BL1																												191.71	84	280
33	197.91	29.4	BL1																												197.91	86	281
34	204.101	29.4	BL1																												204.101	76	271
35	210.319	29.4	BL1																												210.319	84	279
36	216.509	29.4	BL1																												216.509	76	275
37	222.688	29.4	BL1																												222.688	75	272
38	228.861	29.4	BL1																												228.861	74	271
39	235.043	29.4	BL1																												235.043	77	271
40	241.219	29.4	BL1																												241.219	62	271
41	247.404	29.4	BL1																												247.404	76	273
42	253.582	29.4	BL1																												253.582	67	266
43	259.759	29.4	BL1																												259.759	71	263
44	265.947	29.4	BL1																												265.947	76	268
45	272.14	29.4	BL1																												272.14	70	269
46	278.324	29.4	BL1																												278.324	55	267
47	284.5	29.4	BL1																												284.5	63	267
48	290.684	29.4	BL1																												290.684	72	275
49	296.855	29.4	BL1																												296.855	62	267
50	303.031	29.4	BL1																												303.031	64	267
51	309.212	29.4	BL1																												309.212	60	262
52	315.404	29.4	BL1																												315.404	65	272
53	321.596	29.4	BL1																												321.596	73	265
54	327.789	29.4	BL1																												327.789	65	268
55	333.991	29.4	BL1																												333.991	69	275
56	340.19	29.4	BL1																												340.19	64	256
57	346.374	29.4	BL1																												346.374	67	272
58	352.556	29.4	BL1																												352.556	68	270
59	358.745	29.4	BL1																												358.745	61	269
60	364.925	29.4	BL1																												364.925	59	270
61	371.11	29.4	BL1																												371.11	55	270
62	377.308	29.4	BL1																												377.308	68	266
63	383.495	29.4	BL1																												383.495	67	266
64	389.676	29.4	BL1																												389.676	66	277
65	395.856	29.4	BL1																												395.856	57	266
66	402.053	29.3	BL1																												402.053	65	265
67	408.243	29.4	BL1																												408.243	62	266
68	414.44	29.4	BL1																												414.44	67	263
69	420.628	29.3	BL1																												420.628	65	265
70	426.826	29.3	BL1																												426.826	69	273
71	433.015	29.3	BL1																												433.015	54	262
72	439.199	29.3	BL1																												439.199	62	265
73	445.378	29.3	BL1																												445.378	51	269
74	451.562	29.3	BL1																												451.562	61	268
75	457.74	29.3	BL1																												457.74	50	269
76	463.925	29.3	BL1																												463.925	60	267
77	470.112	29.3	BL1																												470.112	65	263
78	476.288	29.3	BL1																												476.288	60	269
79	482.476	29.3	BL1																												482.476	60	258
80	488.649	29.3	BL1																												488.649	64	265
81	494.823	29.2	BL1																												494.823	67	271
82	500.998	29.2	BL1																												500.998	68	265
83	507.18	29.2	BL1																												507.18	63	267
84	513.359	29.2	BL1																												513.359	65	257
85	519.545	29.2	BL1																												519.545	64	257
86	525.725	29.2	BL1																												525.725	61	270
87	531.91	29.2	BL1																												531.91	56	263
88	538.084	29.2	BL1																												538.084	57	269
89	544.26	29.2	BL1																												544.26	65	260
90	550.445	29.2	BL1																												550.445	58	256
91	556.625	29.2	BL1																												556.625	59	256
92	562.807	29.2	BL1																												562.807	66	263
93	568.994	29.2	BL1																												568.994	56	262
94	575.18	29.2	BL1																												575.18	68	259
95	581.371	29.2	BL1																												581.371	56	260
96	587.565	29.2	BL1																												587.565	60	256
97	593.759	29.2	BL1																												593.759	68	256
98	599.948	29.2	BL1																												599.948	65	254
99	606.136	29.2	BL1																												606.136	54	262
100	612.327	29.2	BL1																												612.327	61	268
101	618.523	29.2	BL1																												618.523	62	264
102	624.71	29.2	BL1																												624.71	57	256
103	630.906	29.2	BL1																												630.906	63	264
104	637.097	29.2	BL1																												637.097	71	253
105	643.289	29.2	BL1																												643.289	63	253
106	649.468	29.2	BL1																												649.468	57	257
107	655.647	29.2	BL1																												655.647	64	257
108	661.829	29.1	BL1																												661.829	61	270
109	668.013	29.1	BL1																												668.013	53	265
110	674.202	29.2	BL1																												674.202	64	259
111	680.382	29.1	BL1																												680.382	53	267
112	686.559	29.2	BL1																												686.559	52	259
113	692.737	29.1	BL1																												692.737	66	256
114	698.913	29.1	BL1																												698.913	56	258
115	705.096	29.1	BL1																												705.096	60	265
116	711.276	29.2	BL1																												711.276	58	256
117	717.447	29.2	BL1																												717.447	67	269
118	723.621	29.2	BL1																												723.621	62	260
119	729.798	29.2	BL1																												729.798	64	258
120	735.976	29.2	BL1																												735.976	59	265
121	742.151	29.2	BL1																												742.151	58	252
122	748.331	29.2	BL1																												748.331	54	259
123	754.51	29.2	BL1																												754.51	61	262
124	760.684	29.2	BL1																												760.684	64	257
125	766.864	29.2	BL1																												766.864	60	256
126	773.039	29.2	BL1																												773.039	62	263
127	779.217	29.2	BL1																												779.217	66	259
128	785.397	29.2	BL1																												785.397	62	270
129	791.586	29.2	BL1																												791.586	58	257
130	797.774	29.2	BL1																												797.774	60	257
131	803.96	29.2	BL1																												803.96	59	259
132	810.139	29.2	BL1																												810.139	67	269
133	816.323	29.2	BL1																												816.323	57	258
134	822.504	29.2	BL1																												822.504	62	269
135	828.696	29.2	BL1																												828.696	67	264
136	834.879	29.2	BL1																												834.879	63	256
137	841.069	29.2	BL1																												841.069	59	257
138	847.257	29.2	BL1																												847.257	66	253
139	853.452	29.2	BL1																												853.452	61	260
140	859.648	29.1	BL1																												859.648	62	264
141	865.835	29.1	BL1																												865.835	68	251
142	872.023	29.1	BL1																												872.023	61	259
143	878.21	29.2	BL1																												878.21	61	258
144	884.401	29.1	BL1																												884.401	57	266
145	890.581	29.1	BL1																												890.581	59	259
146	896.766	29.1	BL1																												896.766	65	260
147	902.95	29.1	BL1																												902.95	60	258
148	909.132	29.1	BL1																												909.132	55	257
149	915.313	29.1	BL1																												915.313	56	256
150	921.497	29.1	BL1																												921.497	60	259
151	927.68	29.1	BL1																												927.68	69	255
152	933.86	29.1	BL1																												933.86	63	257
153	940.056	29.1	BL1																												940.056	72	257
154	946.249	29.1	BL1																												946.249	66	259
155	952.431	29.1	BL1																												952.431	57	257
156	958.606	29.1	BL1																												958.606	61	255
157	964.779	29.1	BL1																												964.779	61	257
158	970.965	29.1	BL1																												970.965	67	258
159	977.137	29.1	BL1																												977.137	58	254
160	983.31	29.1	BL1																												983.31	59	256
161	989.488	29.1	BL1																												989.488	58	264
162	995.671	29.1	BL1																												995.671	60	264
163	1001.87	29.1	BL1																												1001.87	56	260
164	1008.06	29.1	BL1																												1008.06	59	254
165	1014.25	29.1	BL1																												1014.25	59	251
166	1020.43	29.1	BL1																												1020.43	63	253
167	1026.6	29.1	BL1																												1026.6	68	254
168	1032.78	29.1	BL1																												1032.78	62	267
169	1038.97	29.1	BL1																												1038.97	67	262
170	1045.15	29.1	BL1																												1045.15	67	259
171	1051.34	29.1	BL1																												1051.34	61	255
172	1057.54	29.1	BL1																												1057.54	60	253
173	1063.75	29.1	BL1																												1063.75	66	262
174	1069.94	29.1	BL1																												1069.94	73	255
175	1076.15	29.1	BL1																												1076.15	66	256
176	1082.34	29.1	BL1																												1082.34	64	255
177	1088.53	29.1	BL1																												1088.53	63	258
178	1094.71	29.1	BL1																												1094.71	59	256
179	1100.89	29.1	BL1																												1100.89	61	250
180	1107.06	29.1	BL1																												1107.06	57	259
181	1113.25	29.1	BL1																												1113.25	61	264
182	1119.43	29.1	BL1																												1119.43	59	253
183	1125.61	29.1	BL1																												1125.61	68	252
184	1131.79	29.1	BL1																												1131.79	68	250
185	1137.98	29.1	BL1																												1137.98	64	252
186	1144.17	29.1	BL1																												1144.17	62	256
187	1150.35	29.1	BL1																												1150.35	71	253
188	1156.53	29.1	BL1																												1156.53	64	259
189	1162.71	29.1	BL1																												1162.71	56	257
190	1168.89	29.1	BL1																												1168.89	69	254
191	1175.07	29.1	BL1																												1175.07	68	252
192	1181.25	29.1	BL1																												1181.25	63	259
193	1187.43	29.1	BL1																												1187.43	65	252
194	1193.62	29.1	BL1																												1193.62	66	253
195	1199.81	29.1	BL1																												1199.81	58	259
196	1205.99	29.1	BL1																												1205.99	63	261
197	1212.18	29.1	BL1																												1212.18	65	256
198	1218.35	29.2	BL1																												1218.35	59	255
199	1224.53	29.1	BL1																												1224.53	57	261
200	1230.7	29.1	BL1																												1230.7	60	257
201	1236.88	29.1	BL1																												1236.88	66	247
202	1243.06	29.1	BL1																												1243.06	59	256
203	1249.24	29.1	BL1																												1249.24	61	256
204	1255.43	29.1	BL1																												1255.43	67	261
205	1261.62	29.1	BL1																												1261.62	68	255
206	1267.81	29.1	BL1																												1267.81	63	254
207	1274	29.1	BL1																												1274	71	253
208	1280.17	29.1	BL1																												1280.17	63	260
209	1286.36	29.1	BL1																												1286.36	61	262
210	1292.54	29.1	BL1																												1292.54	64	255
211	1298.72	29.1	BL1																												1298.72		255
Rawdata (perpendicular)
Cycle Nr.	Time [s]	Temp. [°C]	A1	A2	A3	A4	A5	A6	A7	A8	A9	A10	A11	A12	B1	B2	B3	B4	B5	B6	B7	B8	B9	B10	B11	B12	C1	C2	C3	C4	C5	C6	C7	C8	C9	C10	C11	C12	D1	D2	D3	D4	D5	D6	D7	D8	D9	D10	D11
1	0	30.1	293																													44885	45391
2	6.191	30	301																													45506	46402
3	12.367	30	288																													44333	45065
4	18.538	30	305																													42943	45108
5	24.724	30	278																													41976	45355
6	30.908	30	296																													41537	45251
7	37.091	29.9	289																													41083	45139
8	43.267	29.9	289																													39527	44469
9	49.453	29.9	295																													39521	44235
10	55.624	29.9	283																													38505	44392
11	61.808	29.8	286																													37847	43986
12	67.993	29.8	280																													37740	43500
13	74.193	29.7	290																													37199	44135
14	80.373	29.7	294																													36607	43717
15	86.562	29.7	279																													35927	44372
16	92.746	29.6	271																													34934	44041
17	98.933	29.6	283																													34962	44025
18	105.117	29.6	304																													34478	43300
19	111.319	29.5	267																													34007	43710
20	117.488	29.5	283																													33682	43128
21	123.67	29.5	275																													33416	42977
22	129.849	29.5	293																													32671	43203
23	136.036	29.5	291																													32465	43110
24	142.221	29.4	299																													32106	42950
25	148.405	29.4	281																													31576	42680
26	154.593	29.4	290																													31918	42347
27	160.77	29.4	292																													31347	42888
28	166.954	29.4	281																													31431	43261
29	173.149	29.4	308																													30604	42374
30	179.341	29.4	288																													31208	42051
31	185.521	29.4	276																													30523	42174
32	191.71	29.4	292																													30265	41771
33	197.91	29.4	292																													30347	41603
34	204.101	29.4	285																													30697	42367
35	210.319	29.4	306																													30108	41889
36	216.509	29.4	287																													30098	42069
37	222.688	29.4	288																													30094	42306
38	228.861	29.4	290																													29946	42233
39	235.043	29.4	285																													29495	41734
40	241.219	29.4	282																													30058	41794
41	247.404	29.4	295																													29764	41536
42	253.582	29.4	277																													29500	42383
43	259.759	29.4	286																													29289	42644
44	265.947	29.4	290																													29206	41710
45	272.14	29.4	281																													29692	41737
46	278.324	29.4	301																													30139	41625
47	284.5	29.4	280																													29395	41627
48	290.684	29.4	276																													29255	41580
49	296.855	29.4	296																													29333	41671
50	303.031	29.4	295																													29266	41905
51	309.212	29.4	281																													29558	41351
52	315.404	29.4	293																													29267	41149
53	321.596	29.4	286																													29064	41261
54	327.789	29.4	289																													29246	41378
55	333.991	29.4	268																													28913	41038
56	340.19	29.4	285																													29092	41807
57	346.374	29.4	285																													29268	41075
58	352.556	29.4	297																													29087	40547
59	358.745	29.4	280																													28915	41098
60	364.925	29.4	300																													28964	41012
61	371.11	29.4	286																													29225	40856
62	377.308	29.4	264																													28869	40466
63	383.495	29.4	284																													28941	40608
64	389.676	29.4	292																													28351	40260
65	395.856	29.4	285																													28917	40279
66	402.053	29.3	294																													28904	40519
67	408.243	29.4	278																													28693	40415
68	414.44	29.4	308																													28292	40519
69	420.628	29.3	283																													28708	40486
70	426.826	29.3	281																													28409	40003
71	433.015	29.3	302																													28704	40415
72	439.199	29.3	276																													28537	40258
73	445.378	29.3	288																													28817	40132
74	451.562	29.3	290																													28795	39769
75	457.74	29.3	278																													28772	39959
76	463.925	29.3	285																													28501	39871
77	470.112	29.3	292																													28608	40302
78	476.288	29.3	285																													28185	39991
79	482.476	29.3	270																													28666	40600
80	488.649	29.3	280																													28239	40107
81	494.823	29.2	284																													28148	39809
82	500.998	29.2	282																													28379	39968
83	507.18	29.2	297																													28582	40260
84	513.359	29.2	273																													28632	40889
85	519.545	29.2	279																													28628	40848
86	525.725	29.2	282																													28927	40181
87	531.91	29.2	274																													29120	40070
88	538.084	29.2	295																													28823	39786
89	544.26	29.2	279																													28283	40137
90	550.445	29.2	269																													28839	40634
91	556.625	29.2	284																													28823	40445
92	562.807	29.2	278																													28434	40187
93	568.994	29.2	286																													28774	40244
94	575.18	29.2	287																													28591	40528
95	581.371	29.2	273																													28514	39754
96	587.565	29.2	287																													28566	40071
97	593.759	29.2	275																													28335	40247
98	599.948	29.2	285																													28353	40270
99	606.136	29.2	277																													28735	39640
100	612.327	29.2	288																													28169	39388
101	618.523	29.2	286																													28194	39645
102	624.71	29.2	291																													28445	40063
103	630.906	29.2	285																													28562	39538
104	637.097	29.2	295																													28405	40101
105	643.289	29.2	273																													28406	40167
106	649.468	29.2	288																													28443	39886
107	655.647	29.2	290																													28464	39491
108	661.829	29.1	293																													28552	39413
109	668.013	29.1	273																													28658	39332
110	674.202	29.2	280																													27997	39691
111	680.382	29.1	293																													28477	39171
112	686.559	29.2	289																													28745	39614
113	692.737	29.1	280																													28087	40256
114	698.913	29.1	288																													28475	39492
115	705.096	29.1	290																													28651	39334
116	711.276	29.2	298																													28585	39928
117	717.447	29.2	285																													28393	39267
118	723.621	29.2	289																													28368	39653
119	729.798	29.2	287																													28364	39428
120	735.976	29.2	293																													28712	39058
121	742.151	29.2	267																													28560	40075
122	748.331	29.2	280																													28809	39605
123	754.51	29.2	277																													28643	39064
124	760.684	29.2	299																													28143	39342
125	766.864	29.2	278																													28249	39588
126	773.039	29.2	305																													28422	39427
127	779.217	29.2	282																													28039	39452
128	785.397	29.2	282																													28109	38646
129	791.586	29.2	285																													28345	39481
130	797.774	29.2	273																													28294	39265
131	803.96	29.2	290																													28047	39218
132	810.139	29.2	302																													28008	39045
133	816.323	29.2	283																													28515	39366
134	822.504	29.2	276																													28344	38596
135	828.696	29.2	273																													28046	38902
136	834.879	29.2	276																													28226	39417
137	841.069	29.2	286																													28235	39205
138	847.257	29.2	273																													27814	39186
139	853.452	29.2	286																													27862	38787
140	859.648	29.1	295																													27875	38565
141	865.835	29.1	288																													28137	39573
142	872.023	29.1	291																													28149	38874
143	878.21	29.2	294																													27994	39155
144	884.401	29.1	283																													28153	38427
145	890.581	29.1	279																													27800	38625
146	896.766	29.1	278																													27890	38796
147	902.95	29.1	287																													28246	38505
148	909.132	29.1	277																													28154	38679
149	915.313	29.1	282																													27913	38805
150	921.497	29.1	291																													27621	38563
151	927.68	29.1	274																													27849	38927
152	933.86	29.1	279																													28220	38676
153	940.056	29.1	286																													27821	38695
154	946.249	29.1	284																													28122	38828
155	952.431	29.1	273																													28088	38681
156	958.606	29.1	275																													28049	38663
157	964.779	29.1	276																													27797	38712
158	970.965	29.1	276																													27717	38480
159	977.137	29.1	286																													28011	38477
160	983.31	29.1	288																													27746	38010
161	989.488	29.1	289																													27734	38188
162	995.671	29.1	297																													27924	38027
163	1001.87	29.1	287																													27658	38200
164	1008.06	29.1	289																													27939	38642
165	1014.25	29.1	274																													27883	38710
166	1020.43	29.1	279																													27806	38783
167	1026.6	29.1	284																													27445	38332
168	1032.78	29.1	285																													27799	37946
169	1038.97	29.1	280																													27966	38184
170	1045.15	29.1	282																													27843	38540
171	1051.34	29.1	279																													28109	38396
172	1057.54	29.1	281																													28109	38622
173	1063.75	29.1	279																													27666	37948
174	1069.94	29.1	283																													27395	38026
175	1076.15	29.1	287																													27713	38371
176	1082.34	29.1	285																													27619	38044
177	1088.53	29.1	303																													27919	38323
178	1094.71	29.1	287																													27629	37917
179	1100.89	29.1	278																													28055	38381
180	1107.06	29.1	284																													28108	38077
181	1113.25	29.1	285																													27914	38150
182	1119.43	29.1	270																													27916	38725
183	1125.61	29.1	280																													27750	38099
184	1131.79	29.1	275																													27984	38242
185	1137.98	29.1	302																													27965	38689
186	1144.17	29.1	282																													27936	38235
187	1150.35	29.1	288																													27736	38411
188	1156.53	29.1	294																													28062	38282
189	1162.71	29.1	296																													27793	38361
190	1168.89	29.1	272																													27938	38241
191	1175.07	29.1	284																													27915	38673
192	1181.25	29.1	282																													27775	38494
193	1187.43	29.1	271																													27695	38360
194	1193.62	29.1	279																													28027	38172
195	1199.81	29.1	293																													27821	38273
196	1205.99	29.1	294																													28040	38251
197	1212.18	29.1	272																													27932	38293
198	1218.35	29.2	278																													28083	38532
199	1224.53	29.1	301																													28276	38315
200	1230.7	29.1	278																													28054	38575
201	1236.88	29.1	281																													28110	38907
202	1243.06	29.1	291																													27976	38195
203	1249.24	29.1	275																													27984	38607
204	1255.43	29.1	289																													27679	38190
205	1261.62	29.1	285																													27503	38101
206	1267.81	29.1	289																													27994	38412
207	1274	29.1	281																													27693	38381
208	1280.17	29.1	301																													27842	38029
209	1286.36	29.1	294																													27840	37810
210	1292.54	29.1	287																													27683	37982
211	1298.72	29.1	287																														38151
Rawdata (parallel)
Cycle Nr.	Time [s]	Temp. [°C]	A1	A2	A3	A4	A5	A6	A7	A8	A9	A10	A11	A12	B1	B2	B3	B4	B5	B6	B7	B8	B9	B10	B11	B12	C1	C2	C3	C4	C5	C6	C7	C8	C9	C10	C11	C12	D1	D2	D3	D4	D5	D6	D7	D8	D9	D10	D11
1	0	30.1	374																													38672	46727
2	6.191	30	377																													39163	46700
3	12.367	30	363																													37805	45924
4	18.538	30	366																													36493	45821
5	24.724	30	379																													35526	46435
6	30.908	30	359																													34902	45738
7	37.091	29.9	364																													33450	45108
8	43.267	29.9	378																													32368	45127
9	49.453	29.9	349																													31651	44647
10	55.624	29.9	360																													30667	44643
11	61.808	29.8	368																													29832	44373
12	67.993	29.8	369																													29163	44626
13	74.193	29.7	381																													28406	44024
14	80.373	29.7	355																													27619	43859
15	86.562	29.7	353																													27090	43886
16	92.746	29.6	366																													26196	43596
17	98.933	29.6	375																													25817	43762
18	105.117	29.6	364																													25130	43259
19	111.319	29.5	395																													25105	43184
20	117.488	29.5	372																													24433	43399
21	123.67	29.5	367																													23993	42597
22	129.849	29.5	377																													23170	43512
23	136.036	29.5	358																													22789	42745
24	142.221	29.4	375																													22747	42100
25	148.405	29.4	375																													22076	42019
26	154.593	29.4	361																													21650	41903
27	160.77	29.4	385																													21603	42463
28	166.954	29.4	375																													21246	41627
29	173.149	29.4	370																													20977	41508
30	179.341	29.4	358																													20806	41539
31	185.521	29.4	374																													20441	41491
32	191.71	29.4	373																													20163	41466
33	197.91	29.4	377																													20299	41434
34	204.101	29.4	352																													20104	41287
35	210.319	29.4	372																													20042	41486
36	216.509	29.4	355																													19714	41334
37	222.688	29.4	357																													19694	41339
38	228.861	29.4	360																													19535	41147
39	235.043	29.4	375																													19377	40695
40	241.219	29.4	361																													19181	40685
41	247.404	29.4	346																													19501	40597
42	253.582	29.4	379																													19020	40880
43	259.759	29.4	347																													18984	40863
44	265.947	29.4	364																													19158	40338
45	272.14	29.4	363																													19220	40459
46	278.324	29.4	348																													18921	40181
47	284.5	29.4	357																													18788	40196
48	290.684	29.4	356																													19008	40878
49	296.855	29.4	383																													18722	40237
50	303.031	29.4	356																													18734	40495
51	309.212	29.4	380																													18806	39548
52	315.404	29.4	363																													18759	40160
53	321.596	29.4	369																													18941	39686
54	327.789	29.4	352																													18749	40046
55	333.991	29.4	337																													18676	40296
56	340.19	29.4	357																													18616	39433
57	346.374	29.4	365																													18867	40072
58	352.556	29.4	365																													18760	39382
59	358.745	29.4	367																													18416	39915
60	364.925	29.4	356																													18358	39833
61	371.11	29.4	361																													18395	39691
62	377.308	29.4	353																													18646	39004
63	383.495	29.4	346																													18639	39095
64	389.676	29.4	367																													18240	39715
65	395.856	29.4	355																													18247	38848
66	402.053	29.3	359																													18536	38969
67	408.243	29.4	355																													18308	38950
68	414.44	29.4	360																													18194	38798
69	420.628	29.3	366																													18411	38925
70	426.826	29.3	349																													18356	39125
71	433.015	29.3	365																													18031	38601
72	439.199	29.3	346																													18205	38757
73	445.378	29.3	352																													17987	38962
74	451.562	29.3	369																													18338	38504
75	457.74	29.3	350																													17915	38760
76	463.925	29.3	355																													18117	38485
77	470.112	29.3	366																													18351	38619
78	476.288	29.3	361																													17913	38839
79	482.476	29.3	350																													18194	38513
80	488.649	29.3	365																													18088	38573
81	494.823	29.2	357																													18117	38806
82	500.998	29.2	368																													18331	38465
83	507.18	29.2	355																													18236	38886
84	513.359	29.2	356																													18379	38714
85	519.545	29.2	366																													18348	38618
86	525.725	29.2	356																													18398	39057
87	531.91	29.2	363																													18352	38373
88	538.084	29.2	352																													18173	38588
89	544.26	29.2	368																													18172	38221
90	550.445	29.2	366																													18253	38400
91	556.625	29.2	352																													18266	38198
92	562.807	29.2	377																													18294	38482
93	568.994	29.2	366																													18125	38451
94	575.18	29.2	368																													18456	38527
95	581.371	29.2	351																													17978	37846
96	587.565	29.2	336																													18120	37815
97	593.759	29.2	370																													18314	37966
98	599.948	29.2	358																													18192	37808
99	606.136	29.2	372																													18049	37937
100	612.327	29.2	356																													17919	38127
101	618.523	29.2	382																													17995	38056
102	624.71	29.2	356																													17952	37778
103	630.906	29.2	347																													18240	37956
104	637.097	29.2	358																													18447	37629
105	643.289	29.2	353																													18157	37644
106	649.468	29.2	353																													17961	37722
107	655.647	29.2	342																													18213	37319
108	661.829	29.1	361																													18187	38358
109	668.013	29.1	355																													17965	37820
110	674.202	29.2	366																													17923	37708
111	680.382	29.1	364																													17840	37859
112	686.559	29.2	370																													17987	37667
113	692.737	29.1	367																													18081	38010
114	698.913	29.1	367																													17969	37403
115	705.096	29.1	359																													18205	37865
116	711.276	29.2	346																													18061	37667
117	717.447	29.2	363																													18300	38067
118	723.621	29.2	355																													18088	37760
119	729.798	29.2	362																													18162	37378
120	735.976	29.2	385																													18231	37587
121	742.151	29.2	376																													18109	37516
122	748.331	29.2	358																													18069	37594
123	754.51	29.2	362																													18246	37365
124	760.684	29.2	368																													18026	37209
125	766.864	29.2	366																													17957	37376
126	773.039	29.2	334																													18092	37718
127	779.217	29.2	363																													18018	37514
128	785.397	29.2	377																													17966	37598
129	791.586	29.2	368																													17941	37330
130	797.774	29.2	346																													17986	37099
131	803.96	29.2	375																													17807	37255
132	810.139	29.2	354																													18013	37871
133	816.323	29.2	368																													18035	37309
134	822.504	29.2	363																													18072	37444
135	828.696	29.2	364																													18076	37370
136	834.879	29.2	342																													18036	37226
137	841.069	29.2	381																													17917	37075
138	847.257	29.2	366																													17884	36790
139	853.452	29.2	338																													17726	36918
140	859.648	29.1	352																													17766	37043
141	865.835	29.1	343																													18146	36922
142	872.023	29.1	366																													17917	36956
143	878.21	29.2	358																													17824	37131
144	884.401	29.1	359																													17789	37067
145	890.581	29.1	357																													17613	36701
146	896.766	29.1	348																													17888	36919
147	902.95	29.1	363																													17937	36497
148	909.132	29.1	359																													17699	36574
149	915.313	29.1	354																													17579	36626
150	921.497	29.1	369																													17555	36640
151	927.68	29.1	352																													18000	36653
152	933.86	29.1	351																													18013	36617
153	940.056	29.1	336																													18063	36588
154	946.249	29.1	362																													18098	36914
155	952.431	29.1	359																													17743	36612
156	958.606	29.1	356																													17861	36454
157	964.779	29.1	358																													17706	36625
158	970.965	29.1	364																													17858	36499
159	977.137	29.1	341																													17705	36119
160	983.31	29.1	358																													17610	35863
161	989.488	29.1	358																													17567	36634
162	995.671	29.1	351																													17716	36454
163	1001.87	29.1	350																													17429	36355
164	1008.06	29.1	356																													17698	36305
165	1014.25	29.1	364																													17696	36159
166	1020.43	29.1	364																													17764	36396
167	1026.6	29.1	367																													17711	36068
168	1032.78	29.1	361																													17745	36663
169	1038.97	29.1	365																													18015	36523
170	1045.15	29.1	350																													17918	36608
171	1051.34	29.1	364																													17889	36173
172	1057.54	29.1	344																													17835	36213
173	1063.75	29.1	358																													17787	36268
174	1069.94	29.1	356																													17868	35834
175	1076.15	29.1	364																													17805	36190
176	1082.34	29.1	346																													17687	35806
177	1088.53	29.1	348																													17821	36278
178	1094.71	29.1	358																													17526	35785
179	1100.89	29.1	360																													17871	35797
180	1107.06	29.1	359																													17741	36165
181	1113.25	29.1	353																													17782	36600
182	1119.43	29.1	368																													17722	36346
183	1125.61	29.1	358																													17929	35688
184	1131.79	29.1	354																													18055	35656
185	1137.98	29.1	345																													17893	36158
186	1144.17	29.1	343																													17800	36071
187	1150.35	29.1	358																													18022	36005
188	1156.53	29.1	358																													17963	36355
189	1162.71	29.1	353																													17525	36291
190	1168.89	29.1	366																													18069	35931
191	1175.07	29.1	352																													18021	36158
192	1181.25	29.1	347																													17726	36589
193	1187.43	29.1	356																													17768	35880
194	1193.62	29.1	344																													18009	35796
195	1199.81	29.1	352																													17594	36320
196	1205.99	29.1	365																													17905	36478
197	1212.18	29.1	360																													17939	36132
198	1218.35	29.2	342																													17794	36275
199	1224.53	29.1	348																													17849	36531
200	1230.7	29.1	359																													17812	36468
201	1236.88	29.1	361																													18075	36015
202	1243.06	29.1	365																													17746	36018
203	1249.24	29.1	360																													17819	36430
204	1255.43	29.1	359																													17835	36439
205	1261.62	29.1	351																													17745	35850
206	1267.81	29.1	394																													17933	36130
207	1274	29.1	359																													17986	36003
208	1280.17	29.1	361																													17788	36164
209	1286.36	29.1	353																													17727	36153
210	1292.54	29.1	353																													17730	35807
211	1298.72	29.1	374																														35985
Anisotropy
Cycle Nr.	Time [s]	Temp. [°C]	A1	A2	A3	A4	A5	A6	A7	A8	A9	A10	A11	A12	B1	B2	B3	B4	B5	B6	B7	B8	B9	B10	B11	B12	C1	C2	C3	C4	C5	C6	C7	C8	C9	C10	C11	C12	D1	D2	D3	D4	D5	D6	D7	D8	D9	D10	D11
1	0	30.1	BL1																													153	219
2	6.191	30	BL1																													152	211
3	12.367	30	BL1																													149	216
4	18.538	30	BL1																													148	214
5	24.724	30	BL1																													146	217
6	30.908	30	BL1																													143	213
7	37.091	29.9	BL1																													132	208
8	43.267	29.9	BL1																													133	214
9	49.453	29.9	BL1																													126	212
10	55.624	29.9	BL1																													123	211
11	61.808	29.8	BL1																													119	212
12	67.993	29.8	BL1																													112	218
13	74.193	29.7	BL1																													108	207
14	80.373	29.7	BL1																													103	210
15	86.562	29.7	BL1																													103	204
16	92.746	29.6	BL1																													101	204
17	98.933	29.6	BL1																													95	206
18	105.117	29.6	BL1																													91	208
19	111.319	29.5	BL1																													95	203
20	117.488	29.5	BL1																													89	211
21	123.67	29.5	BL1																													85	205
22	129.849	29.5	BL1																													80	211
23	136.036	29.5	BL1																													77	205
24	142.221	29.4	BL1																													80	201
25	148.405	29.4	BL1																													75	202
26	154.593	29.4	BL1																													65	204
27	160.77	29.4	BL1																													70	204
28	166.954	29.4	BL1																													63	194
29	173.149	29.4	BL1																													68	201
30	179.341	29.4	BL1																													58	204
31	185.521	29.4	BL1																													59	202
32	191.71	29.4	BL1																													58	206
33	197.91	29.4	BL1																													59	207
34	204.101	29.4	BL1																													52	199
35	210.319	29.4	BL1																													58	205
36	216.509	29.4	BL1																													52	202
37	222.688	29.4	BL1																													52	200
38	228.861	29.4	BL1																													50	199
39	235.043	29.4	BL1																													53	199
40	241.219	29.4	BL1																													43	198
41	247.404	29.4	BL1																													52	200
42	253.582	29.4	BL1																													46	195
43	259.759	29.4	BL1																													48	192
44	265.947	29.4	BL1																													52	196
45	272.14	29.4	BL1																													47	197
46	278.324	29.4	BL1																													37	195
47	284.5	29.4	BL1																													43	195
48	290.684	29.4	BL1																													49	202
49	296.855	29.4	BL1																													42	195
50	303.031	29.4	BL1																													44	196
51	309.212	29.4	BL1																													41	191
52	315.404	29.4	BL1																													44	199
53	321.596	29.4	BL1																													50	194
54	327.789	29.4	BL1																													44	196
55	333.991	29.4	BL1																													47	202
56	340.19	29.4	BL1																													44	186
57	346.374	29.4	BL1																													46	199
58	352.556	29.4	BL1																													46	197
59	358.745	29.4	BL1																													42	197
60	364.925	29.4	BL1																													40	198
61	371.11	29.4	BL1																													38	197
62	377.308	29.4	BL1																													47	194
63	383.495	29.4	BL1																													46	194
64	389.676	29.4	BL1																													45	203
65	395.856	29.4	BL1																													39	195
66	402.053	29.3	BL1																													44	194
67	408.243	29.4	BL1																													42	194
68	414.44	29.4	BL1																													45	192
69	420.628	29.3	BL1																													44	193
70	426.826	29.3	BL1																													47	200
71	433.015	29.3	BL1																													37	191
72	439.199	29.3	BL1																													42	194
73	445.378	29.3	BL1																													35	197
74	451.562	29.3	BL1																													42	196
75	457.74	29.3	BL1																													34	197
76	463.925	29.3	BL1																													41	195
77	470.112	29.3	BL1																													44	192
78	476.288	29.3	BL1																													41	197
79	482.476	29.3	BL1																													41	188
80	488.649	29.3	BL1																													44	194
81	494.823	29.2	BL1																													45	199
82	500.998	29.2	BL1																													47	194
83	507.18	29.2	BL1																													43	195
84	513.359	29.2	BL1																													44	188
85	519.545	29.2	BL1																													44	187
86	525.725	29.2	BL1																													41	198
87	531.91	29.2	BL1																													38	192
88	538.084	29.2	BL1																													38	197
89	544.26	29.2	BL1																													45	190
90	550.445	29.2	BL1																													39	187
91	556.625	29.2	BL1																													40	187
92	562.807	29.2	BL1																													45	192
93	568.994	29.2	BL1																													38	191
94	575.18	29.2	BL1																													46	189
95	581.371	29.2	BL1																													38	190
96	587.565	29.2	BL1																													41	187
97	593.759	29.2	BL1																													47	186
98	599.948	29.2	BL1																													44	185
99	606.136	29.2	BL1																													37	192
100	612.327	29.2	BL1																													41	196
101	618.523	29.2	BL1																													42	193
102	624.71	29.2	BL1																													39	186
103	630.906	29.2	BL1																													43	193
104	637.097	29.2	BL1																													49	185
105	643.289	29.2	BL1																													43	184
106	649.468	29.2	BL1																													39	187
107	655.647	29.2	BL1																													44	187
108	661.829	29.1	BL1																													42	198
109	668.013	29.1	BL1																													36	194
110	674.202	29.2	BL1																													43	189
111	680.382	29.1	BL1																													36	196
112	686.559	29.2	BL1																													35	189
113	692.737	29.1	BL1																													45	187
114	698.913	29.1	BL1																													38	188
115	705.096	29.1	BL1																													41	194
116	711.276	29.2	BL1																													39	187
117	717.447	29.2	BL1																													46	197
118	723.621	29.2	BL1																													42	190
119	729.798	29.2	BL1																													44	188
120	735.976	29.2	BL1																													40	194
121	742.151	29.2	BL1																													40	183
122	748.331	29.2	BL1																													36	189
123	754.51	29.2	BL1																													42	191
124	760.684	29.2	BL1																													44	187
125	766.864	29.2	BL1																													41	187
126	773.039	29.2	BL1																													42	192
127	779.217	29.2	BL1																													45	189
128	785.397	29.2	BL1																													43	198
129	791.586	29.2	BL1																													39	187
130	797.774	29.2	BL1																													41	187
131	803.96	29.2	BL1																													40	189
132	810.139	29.2	BL1																													45	197
133	816.323	29.2	BL1																													39	188
134	822.504	29.2	BL1																													42	197
135	828.696	29.2	BL1																													46	193
136	834.879	29.2	BL1																													43	187
137	841.069	29.2	BL1																													40	187
138	847.257	29.2	BL1																													45	184
139	853.452	29.2	BL1																													42	190
140	859.648	29.1	BL1																													42	193
141	865.835	29.1	BL1																													46	182
142	872.023	29.1	BL1																													41	189
143	878.21	29.2	BL1																													42	188
144	884.401	29.1	BL1																													39	195
145	890.581	29.1	BL1																													40	189
146	896.766	29.1	BL1																													44	190
147	902.95	29.1	BL1																													41	188
148	909.132	29.1	BL1																													37	187
149	915.313	29.1	BL1																													38	187
150	921.497	29.1	BL1																													41	189
151	927.68	29.1	BL1																													47	186
152	933.86	29.1	BL1																													43	188
153	940.056	29.1	BL1																													49	187
154	946.249	29.1	BL1																													45	189
155	952.431	29.1	BL1																													39	188
156	958.606	29.1	BL1																													42	186
157	964.779	29.1	BL1																													42	187
158	970.965	29.1	BL1																													46	188
159	977.137	29.1	BL1																													39	185
160	983.31	29.1	BL1																													40	186
161	989.488	29.1	BL1																													40	193
162	995.671	29.1	BL1																													41	193
163	1001.87	29.1	BL1																													38	190
164	1008.06	29.1	BL1																													40	185
165	1014.25	29.1	BL1																													40	183
166	1020.43	29.1	BL1																													43	184
167	1026.6	29.1	BL1																													46	185
168	1032.78	29.1	BL1																													42	195
169	1038.97	29.1	BL1																													46	191
170	1045.15	29.1	BL1																													45	189
171	1051.34	29.1	BL1																													41	186
172	1057.54	29.1	BL1																													41	184
173	1063.75	29.1	BL1																													45	191
174	1069.94	29.1	BL1																													50	186
175	1076.15	29.1	BL1																													45	186
176	1082.34	29.1	BL1																													44	186
177	1088.53	29.1	BL1																													43	188
178	1094.71	29.1	BL1																													40	187
179	1100.89	29.1	BL1																													42	182
180	1107.06	29.1	BL1																													39	189
181	1113.25	29.1	BL1																													42	193
182	1119.43	29.1	BL1																													40	184
183	1125.61	29.1	BL1																													47	184
184	1131.79	29.1	BL1																													46	182
185	1137.98	29.1	BL1																													44	183
186	1144.17	29.1	BL1																													42	187
187	1150.35	29.1	BL1																													49	184
188	1156.53	29.1	BL1																													44	189
189	1162.71	29.1	BL1																													38	188
190	1168.89	29.1	BL1																													47	185
191	1175.07	29.1	BL1																													47	183
192	1181.25	29.1	BL1																													43	189
193	1187.43	29.1	BL1																													44	183
194	1193.62	29.1	BL1																													45	184
195	1199.81	29.1	BL1																													39	189
196	1205.99	29.1	BL1																													43	190
197	1212.18	29.1	BL1																													44	186
198	1218.35	29.2	BL1																													40	186
199	1224.53	29.1	BL1																													39	191
200	1230.7	29.1	BL1																													41	187
201	1236.88	29.1	BL1																													45	179
202	1243.06	29.1	BL1																													40	186
203	1249.24	29.1	BL1																													41	186
204	1255.43	29.1	BL1																													46	191
205	1261.62	29.1	BL1																													46	185
206	1267.81	29.1	BL1																													43	185
207	1274	29.1	BL1																													49	184
208	1280.17	29.1	BL1																													43	190
209	1286.36	29.1	BL1																													42	192
210	1292.54	29.1	BL1																													44	186
211	1298.72	29.1	BL1																														186
Total Intensity
Cycle Nr.	Time [s]	Temp. [°C]	A1	A2	A3	A4	A5	A6	A7	A8	A9	A10	A11	A12	B1	B2	B3	B4	B5	B6	B7	B8	B9	B10	B11	B12	C1	C2	C3	C4	C5	C6	C7	C8	C9	C10	C11	C12	D1	D2	D3	D4	D5	D6	D7	D8	D9	D10	D11
1	0	30.1	BL1																													157853	173308
2	6.191	30	BL1																													159955	175260
3	12.367	30	BL1																													155224	171245
4	18.538	30	BL1																													150050	171106
5	24.724	30	BL1																													146417	172735
6	30.908	30	BL1																													144417	171276
7	37.091	29.9	BL1																													140911	169927
8	43.267	29.9	BL1																													135834	168596
9	49.453	29.9	BL1																													134576	167305
10	55.624	29.9	BL1																													130783	167618
11	61.808	29.8	BL1																													127950	166300
12	67.993	29.8	BL1																													126549	165794
13	74.193	29.7	BL1																													124065	165941
14	80.373	29.7	BL1																													121509	164848
15	86.562	29.7	BL1																													119235	166240
16	92.746	29.6	BL1																													115637	165051
17	98.933	29.6	BL1																													114976	165278
18	105.117	29.6	BL1																													112754	162903
19	111.319	29.5	BL1																													111786	163608
20	117.488	29.5	BL1																													109940	162837
21	123.67	29.5	BL1																													108641	161121
22	129.849	29.5	BL1																													105625	163162
23	136.036	29.5	BL1																													104568	161639
24	142.221	29.4	BL1																													103727	160116
25	148.405	29.4	BL1																													101499	159465
26	154.593	29.4	BL1																													101425	158598
27	160.77	29.4	BL1																													100155	160638
28	166.954	29.4	BL1																													99722	159924
29	173.149	29.4	BL1																													97540	157892
30	179.341	29.4	BL1																													98504	157364
31	185.521	29.4	BL1																													96474	157519
32	191.71	29.4	BL1																													95429	156638
33	197.91	29.4	BL1																													95832	156237
34	204.101	29.4	BL1																													96238	157561
35	210.319	29.4	BL1																													94873	156882
36	216.509	29.4	BL1																													94332	157039
37	222.688	29.4	BL1																													94284	157517
38	228.861	29.4	BL1																													93691	157016
39	235.043	29.4	BL1																													92491	155193
40	241.219	29.4	BL1																													93295	155324
41	247.404	29.4	BL1																													93283	154652
42	253.582	29.4	BL1																													91869	156829
43	259.759	29.4	BL1																													91423	157360
44	265.947	29.4	BL1																													91529	154512
45	272.14	29.4	BL1																													92632	154804
46	278.324	29.4	BL1																													92977	154068
47	284.5	29.4	BL1																													91277	154125
48	290.684	29.4	BL1																													91401	155263
49	296.855	29.4	BL1																													90958	154209
50	303.031	29.4	BL1																													90895	155191
51	309.212	29.4	BL1																													91592	152369
52	315.404	29.4	BL1																													90931	153067
53	321.596	29.4	BL1																													90856	152444
54	327.789	29.4	BL1																													90899	153349
55	333.991	29.4	BL1																													90169	153185
56	340.19	29.4	BL1																													90354	153108
57	346.374	29.4	BL1																													91142	152776
58	352.556	29.4	BL1																													90562	150458
59	358.745	29.4	BL1																													89631	152545
60	364.925	29.4	BL1																													89605	152206
61	371.11	29.4	BL1																													90212	151658
62	377.308	29.4	BL1																													90010	149705
63	383.495	29.4	BL1																													90113	150125
64	389.676	29.4	BL1																													88164	150487
65	395.856	29.4	BL1																													89342	149004
66	402.053	29.3	BL1																													89812	149679
67	408.243	29.4	BL1																													89019	149476
68	414.44	29.4	BL1																													87945	149341
69	420.628	29.3	BL1																													89206	149545
70	426.826	29.3	BL1																													88543	148970
71	433.015	29.3	BL1																													88480	148786
72	439.199	29.3	BL1																													88543	148836
73	445.378	29.3	BL1																													88678	148916
74	451.562	29.3	BL1																													89228	147333
75	457.74	29.3	BL1																													88483	148233
76	463.925	29.3	BL1																													88280	147538
77	470.112	29.3	BL1																													88880	148607
78	476.288	29.3	BL1																													87271	148403
79	482.476	29.3	BL1																													88785	149084
80	488.649	29.3	BL1																													87695	148161
81	494.823	29.2	BL1																													87573	147989
82	500.998	29.2	BL1																													88404	147681
83	507.18	29.2	BL1																													88632	149014
84	513.359	29.2	BL1																													89033	150008
85	519.545	29.2	BL1																													88940	149726
86	525.725	29.2	BL1																													89640	149189
87	531.91	29.2	BL1																													89946	147745
88	538.084	29.2	BL1																													89011	147539
89	544.26	29.2	BL1																													87932	147587
90	550.445	29.2	BL1																													89210	148922
91	556.625	29.2	BL1																													89198	148180
92	562.807	29.2	BL1																													88438	148141
93	568.994	29.2	BL1																													88819	148203
94	575.18	29.2	BL1																													89039	148901
95	581.371	29.2	BL1																													88088	146190
96	587.565	29.2	BL1																													88446	146769
97	593.759	29.2	BL1																													88294	147355
98	599.948	29.2	BL1																													88113	147118
99	606.136	29.2	BL1																													88611	146081
100	612.327	29.2	BL1																													87254	145924
101	618.523	29.2	BL1																													87396	146269
102	624.71	29.2	BL1																													87859	146642
103	630.906	29.2	BL1																													88635	145938
104	637.097	29.2	BL1																													88655	146438
105	643.289	29.2	BL1																													88188	146651
106	649.468	29.2	BL1																													87880	146199
107	655.647	29.2	BL1																													88390	144701
108	661.829	29.1	BL1																													88479	146368
109	668.013	29.1	BL1																													88346	145294
110	674.202	29.2	BL1																													86916	145777
111	680.382	29.1	BL1																													87701	144984
112	686.559	29.2	BL1																													88498	145523
113	692.737	29.1	BL1																													87375	147447
114	698.913	29.1	BL1																													87933	144814
115	705.096	29.1	BL1																													88718	145334
116	711.276	29.2	BL1																													88338	146178
117	717.447	29.2	BL1																													88377	145567
118	723.621	29.2	BL1																													87953	145794
119	729.798	29.2	BL1																													88070	144651
120	735.976	29.2	BL1																													88835	144233
121	742.151	29.2	BL1																													88380	146209
122	748.331	29.2	BL1																													88814	145413
123	754.51	29.2	BL1																													88798	143919
124	760.684	29.2	BL1																													87347	144142
125	766.864	29.2	BL1																													87482	144978
126	773.039	29.2	BL1																													88073	145273
127	779.217	29.2	BL1																													87170	144951
128	785.397	29.2	BL1																													87191	143465
129	791.586	29.2	BL1																													87628	144666
130	797.774	29.2	BL1																													87670	143880
131	803.96	29.2	BL1																													86771	143981
132	810.139	29.2	BL1																													87074	144756
133	816.323	29.2	BL1																													88141	144400
134	822.504	29.2	BL1																													87888	143128
135	828.696	29.2	BL1																													87304	143609
136	834.879	29.2	BL1																													87625	144417
137	841.069	29.2	BL1																													87339	143630
138	847.257	29.2	BL1																													86494	143136
139	853.452	29.2	BL1																													86327	142589
140	859.648	29.1	BL1																													86382	142327
141	865.835	29.1	BL1																													87617	144156
142	872.023	29.1	BL1																													87186	142772
143	878.21	29.2	BL1																													86717	143657
144	884.401	29.1	BL1																													86994	142107
145	890.581	29.1	BL1																													85984	141859
146	896.766	29.1	BL1																													86672	142607
147	902.95	29.1	BL1																													87428	141223
148	909.132	29.1	BL1																													86846	141737
149	915.313	29.1	BL1																													86146	142082
150	921.497	29.1	BL1																													85474	141577
151	927.68	29.1	BL1																													86792	142392
152	933.86	29.1	BL1																													87550	141820
153	940.056	29.1	BL1																													86855	141818
154	946.249	29.1	BL1																													87476	142626
155	952.431	29.1	BL1																													86799	141816
156	958.606	29.1	BL1																													86933	141500
157	964.779	29.1	BL1																													86147	141897
158	970.965	29.1	BL1																													86249	141196
159	977.137	29.1	BL1																													86584	140532
160	983.31	29.1	BL1																													85849	139104
161	989.488	29.1	BL1																													85744	140841
162	995.671	29.1	BL1																													86388	140191
163	1001.87	29.1	BL1																													85364	140383
164	1008.06	29.1	BL1																													86396	141163
165	1014.25	29.1	BL1																													86295	141053
166	1020.43	29.1	BL1																													86253	141614
167	1026.6	29.1	BL1																													85420	140109
168	1032.78	29.1	BL1																													86198	140413
169	1038.97	29.1	BL1																													87018	140639
170	1045.15	29.1	BL1																													86622	141526
171	1051.34	29.1	BL1																													87083	140441
172	1057.54	29.1	BL1																													87017	140997
173	1063.75	29.1	BL1																													86023	139724
174	1069.94	29.1	BL1																													85624	139099
175	1076.15	29.1	BL1																													86124	140404
176	1082.34	29.1	BL1																													85757	139095
177	1088.53	29.1	BL1																													86563	140463
178	1094.71	29.1	BL1																													85466	138781
179	1100.89	29.1	BL1																													86952	139746
180	1107.06	29.1	BL1																													86815	139787
181	1113.25	29.1	BL1																													86509	140722
182	1119.43	29.1	BL1																													86409	141421
183	1125.61	29.1	BL1																													86445	138983
184	1131.79	29.1	BL1																													87158	139232
185	1137.98	29.1	BL1																													86789	140986
186	1144.17	29.1	BL1																													86608	139965
187	1150.35	29.1	BL1																													86568	140161
188	1156.53	29.1	BL1																													87101	140517
189	1162.71	29.1	BL1																													85782	140564
190	1168.89	29.1	BL1																													87072	139704
191	1175.07	29.1	BL1																													86942	140977
192	1181.25	29.1	BL1																													86145	141404
193	1187.43	29.1	BL1																													86068	139873
194	1193.62	29.1	BL1																													87168	139350
195	1199.81	29.1	BL1																													85972	140453
196	1205.99	29.1	BL1																													86940	140664
197	1212.18	29.1	BL1																													86840	140182
198	1218.35	29.2	BL1																													86901	140937
199	1224.53	29.1	BL1																													87330	140903
200	1230.7	29.1	BL1																													86845	141338
201	1236.88	29.1	BL1																													87419	141182
202	1243.06	29.1	BL1																													86535	139734
203	1249.24	29.1	BL1																													86721	141337
204	1255.43	29.1	BL1																													86114	140493
205	1261.62	29.1	BL1																													85623	139281
206	1267.81	29.1	BL1																													86859	140321
207	1274	29.1	BL1																													86427	140110
208	1280.17	29.1	BL1																													86329	139650
209	1286.36	29.1	BL1																													86243	139223
210	1292.54	29.1	BL1																													85949	138958
211	1298.72	29.1	BL1																														139578
Intensity (parallel)
Cycle Nr.	Time [s]	Temp. [°C]	A1	A2	A3	A4	A5	A6	A7	A8	A9	A10	A11	A12	B1	B2	B3	B4	B5	B6	B7	B8	B9	B10	B11	B12	C1	C2	C3	C4	C5	C6	C7	C8	C9	C10	C11	C12	D1	D2	D3	D4	D5	D6	D7	D8	D9	D10	D11
1	0	30.1	BL1																													68669	83112
2	6.191	30	BL1																													69544	83058
3	12.367	30	BL1																													67133	81691
4	18.538	30	BL1																													64774	81500
5	24.724	30	BL1																													63019	82579
6	30.908	30	BL1																													61935	81365
7	37.091	29.9	BL1																													59324	80227
8	43.267	29.9	BL1																													57358	80235
9	49.453	29.9	BL1																													56124	79426
10	55.624	29.9	BL1																													54340	79400
11	61.808	29.8	BL1																													52828	78901
12	67.993	29.8	BL1																													51628	79354
13	74.193	29.7	BL1																													50248	78252
14	80.373	29.7	BL1																													48883	78002
15	86.562	29.7	BL1																													47938	78054
16	92.746	29.6	BL1																													46312	77511
17	98.933	29.6	BL1																													45618	77793
18	105.117	29.6	BL1																													44406	76911
19	111.319	29.5	BL1																													44305	76722
20	117.488	29.5	BL1																													43142	77148
21	123.67	29.5	BL1																													42361	75717
22	129.849	29.5	BL1																													40868	77341
23	136.036	29.5	BL1																													40219	76000
24	142.221	29.4	BL1																													40113	74814
25	148.405	29.4	BL1																													38910	74667
26	154.593	29.4	BL1																													38171	74484
27	160.77	29.4	BL1																													38045	75446
28	166.954	29.4	BL1																													37422	73965
29	173.149	29.4	BL1																													36947	73760
30	179.341	29.4	BL1																													36663	73837
31	185.521	29.4	BL1																													35980	73723
32	191.71	29.4	BL1																													35483	73680
33	197.91	29.4	BL1																													35721	73615
34	204.101	29.4	BL1																													35414	73396
35	210.319	29.4	BL1																													35268	73717
36	216.509	29.4	BL1																													34711	73475
37	222.688	29.4	BL1																													34672	73481
38	228.861	29.4	BL1																													34380	73131
39	235.043	29.4	BL1																													34071	72294
40	241.219	29.4	BL1																													33743	72300
41	247.404	29.4	BL1																													34346	72170
42	253.582	29.4	BL1																													33423	72619
43	259.759	29.4	BL1																													33417	72645
44	265.947	29.4	BL1																													33697	71673
45	272.14	29.4	BL1																													33810	71892
46	278.324	29.4	BL1																													33302	71420
47	284.5	29.4	BL1																													33047	71431
48	290.684	29.4	BL1																													33444	72656
49	296.855	29.4	BL1																													32883	71459
50	303.031	29.4	BL1																													32952	71970
51	309.212	29.4	BL1																													33038	70229
52	315.404	29.4	BL1																													32985	71356
53	321.596	29.4	BL1																													33299	70495
54	327.789	29.4	BL1																													32985	71171
55	333.991	29.4	BL1																													32881	71645
56	340.19	29.4	BL1																													32739	70064
57	346.374	29.4	BL1																													33176	71196
58	352.556	29.4	BL1																													32983	69958
59	358.745	29.4	BL1																													32361	70909
60	364.925	29.4	BL1																													32277	70781
61	371.11	29.4	BL1																													32334	70518
62	377.308	29.4	BL1																													32799	69302
63	383.495	29.4	BL1																													32799	69477
64	389.676	29.4	BL1																													32046	70551
65	395.856	29.4	BL1																													32079	69017
66	402.053	29.3	BL1																													32592	69228
67	408.243	29.4	BL1																													32189	69201
68	414.44	29.4	BL1																													31976	68919
69	420.628	29.3	BL1																													32355	69137
70	426.826	29.3	BL1																													32286	69525
71	433.015	29.3	BL1																													31676	68558
72	439.199	29.3	BL1																													32021	68871
73	445.378	29.3	BL1																													31620	69228
74	451.562	29.3	BL1																													32218	68375
75	457.74	29.3	BL1																													31495	68870
76	463.925	29.3	BL1																													31847	68366
77	470.112	29.3	BL1																													32248	68588
78	476.288	29.3	BL1																													31470	68991
79	482.476	29.3	BL1																													31993	68425
80	488.649	29.3	BL1																													31777	68506
81	494.823	29.2	BL1																													31844	68939
82	500.998	29.2	BL1																													32209	68308
83	507.18	29.2	BL1																													32061	69087
84	513.359	29.2	BL1																													32314	68775
85	519.545	29.2	BL1																													32242	68587
86	525.725	29.2	BL1																													32350	69391
87	531.91	29.2	BL1																													32254	68151
88	538.084	29.2	BL1																													31954	68557
89	544.26	29.2	BL1																													31923	67872
90	550.445	29.2	BL1																													32071	68193
91	556.625	29.2	BL1																													32120	67857
92	562.807	29.2	BL1																													32126	68323
93	568.994	29.2	BL1																													31843	68287
94	575.18	29.2	BL1																													32432	68419
95	581.371	29.2	BL1																													31605	67228
96	587.565	29.2	BL1																													31887	67200
97	593.759	29.2	BL1																													32173	67411
98	599.948	29.2	BL1																													31977	67148
99	606.136	29.2	BL1																													31695	67355
100	612.327	29.2	BL1																													31491	67724
101	618.523	29.2	BL1																													31580	67550
102	624.71	29.2	BL1																													31551	67097
103	630.906	29.2	BL1																													32081	67432
104	637.097	29.2	BL1																													32435	66827
105	643.289	29.2	BL1																													31923	66863
106	649.468	29.2	BL1																													31572	67003
107	655.647	29.2	BL1																													32042	66299
108	661.829	29.1	BL1																													31962	68128
109	668.013	29.1	BL1																													31575	67175
110	674.202	29.2	BL1																													31480	66954
111	680.382	29.1	BL1																													31334	67229
112	686.559	29.2	BL1																													31586	66874
113	692.737	29.1	BL1																													31761	67494
114	698.913	29.1	BL1																													31560	66406
115	705.096	29.1	BL1																													31997	67248
116	711.276	29.2	BL1																													31762	66917
117	717.447	29.2	BL1																													32162	67604
118	723.621	29.2	BL1																													31795	67066
119	729.798	29.2	BL1																													31916	66370
120	735.976	29.2	BL1																													31999	66704
121	742.151	29.2	BL1																													31794	66592
122	748.331	29.2	BL1																													31756	66764
123	754.51	29.2	BL1																													32066	66345
124	760.684	29.2	BL1																													31661	66057
125	766.864	29.2	BL1																													31542	66360
126	773.039	29.2	BL1																													31839	67029
127	779.217	29.2	BL1																													31656	66612
128	785.397	29.2	BL1																													31537	66738
129	791.586	29.2	BL1																													31508	66274
130	797.774	29.2	BL1																													31627	65897
131	803.96	29.2	BL1																													31257	66126
132	810.139	29.2	BL1																													31661	67268
133	816.323	29.2	BL1																													31676	66234
134	822.504	29.2	BL1																													31752	66486
135	828.696	29.2	BL1																													31759	66352
136	834.879	29.2	BL1																													31726	66134
137	841.069	29.2	BL1																													31441	65793
138	847.257	29.2	BL1																													31411	65308
139	853.452	29.2	BL1																													31176	65587
140	859.648	29.1	BL1																													31223	65788
141	865.835	29.1	BL1																													31920	65586
142	872.023	29.1	BL1																													31470	65606
143	878.21	29.2	BL1																													31318	65934
144	884.401	29.1	BL1																													31252	65818
145	890.581	29.1	BL1																													30941	65166
146	896.766	29.1	BL1																													31448	65571
147	902.95	29.1	BL1																													31510	64787
148	909.132	29.1	BL1																													31092	64935
149	915.313	29.1	BL1																													30884	65036
150	921.497	29.1	BL1																													30814	65033
151	927.68	29.1	BL1																													31643	65087
152	933.86	29.1	BL1																													31669	65025
153	940.056	29.1	BL1																													31785	64999
154	946.249	29.1	BL1																													31800	65538
155	952.431	29.1	BL1																													31169	65001
156	958.606	29.1	BL1																													31386	64724
157	964.779	29.1	BL1																													31104	65025
158	970.965	29.1	BL1																													31367	64790
159	977.137	29.1	BL1																													31133	64150
160	983.31	29.1	BL1																													30932	63660
161	989.488	29.1	BL1																													30855	65043
162	995.671	29.1	BL1																													31135	64733
163	1001.87	29.1	BL1																													30623	64557
164	1008.06	29.1	BL1																													31095	64457
165	1014.25	29.1	BL1																													31077	64181
166	1020.43	29.1	BL1																													31199	64605
167	1026.6	29.1	BL1																													31097	64012
168	1032.78	29.1	BL1																													31170	65091
169	1038.97	29.1	BL1																													31646	64830
170	1045.15	29.1	BL1																													31499	65010
171	1051.34	29.1	BL1																													31422	64206
172	1057.54	29.1	BL1																													31361	64313
173	1063.75	29.1	BL1																													31249	64386
174	1069.94	29.1	BL1																													31399	63613
175	1076.15	29.1	BL1																													31272	64236
176	1082.34	29.1	BL1																													31091	63578
177	1088.53	29.1	BL1																													31330	64423
178	1094.71	29.1	BL1																													30781	63519
179	1100.89	29.1	BL1																													31397	63539
180	1107.06	29.1	BL1																													31167	64201
181	1113.25	29.1	BL1																													31250	64991
182	1119.43	29.1	BL1																													31116	64510
183	1125.61	29.1	BL1																													31505	63347
184	1131.79	29.1	BL1																													31739	63298
185	1137.98	29.1	BL1																													31463	64213
186	1144.17	29.1	BL1																													31301	64059
187	1150.35	29.1	BL1																													31673	63916
188	1156.53	29.1	BL1																													31566	64541
189	1162.71	29.1	BL1																													30789	64435
190	1168.89	29.1	BL1																													31741	63767
191	1175.07	29.1	BL1																													31680	64200
192	1181.25	29.1	BL1																													31161	64981
193	1187.43	29.1	BL1																													31220	63694
194	1193.62	29.1	BL1																													31673	63566
195	1199.81	29.1	BL1																													30915	64492
196	1205.99	29.1	BL1																													31448	64751
197	1212.18	29.1	BL1																													31519	64138
198	1218.35	29.2	BL1																													31291	64428
199	1224.53	29.1	BL1																													31380	64876
200	1230.7	29.1	BL1																													31294	64744
201	1236.88	29.1	BL1																													31762	63929
202	1243.06	29.1	BL1																													31164	63926
203	1249.24	29.1	BL1																													31304	64674
204	1255.43	29.1	BL1																													31333	64691
205	1261.62	29.1	BL1																													31189	63649
206	1267.81	29.1	BL1																													31448	64075
207	1274	29.1	BL1																													31604	63910
208	1280.17	29.1	BL1																													31247	64194
209	1286.36	29.1	BL1																													31151	64189
210	1292.54	29.1	BL1																													31157	63568
211	1298.72	29.1	BL1																														63850
Intensity (perpendicular)
Cycle Nr.	Time [s]	Temp. [°C]	A1	A2	A3	A4	A5	A6	A7	A8	A9	A10	A11	A12	B1	B2	B3	B4	B5	B6	B7	B8	B9	B10	B11	B12	C1	C2	C3	C4	C5	C6	C7	C8	C9	C10	C11	C12	D1	D2	D3	D4	D5	D6	D7	D8	D9	D10	D11
1	0	30.1	BL1																													44592	45098
2	6.191	30	BL1																													45205	46101
3	12.367	30	BL1																													44045	44777
4	18.538	30	BL1																													42638	44803
5	24.724	30	BL1																													41699	45078
6	30.908	30	BL1																													41241	44955
7	37.091	29.9	BL1																													40794	44850
8	43.267	29.9	BL1																													39238	44180
9	49.453	29.9	BL1																													39226	43940
10	55.624	29.9	BL1																													38221	44109
11	61.808	29.8	BL1																													37561	43700
12	67.993	29.8	BL1																													37460	43220
13	74.193	29.7	BL1																													36908	43845
14	80.373	29.7	BL1																													36313	43423
15	86.562	29.7	BL1																													35648	44093
16	92.746	29.6	BL1																													34663	43770
17	98.933	29.6	BL1																													34679	43742
18	105.117	29.6	BL1																													34174	42996
19	111.319	29.5	BL1																													33741	43443
20	117.488	29.5	BL1																													33399	42845
21	123.67	29.5	BL1																													33140	42702
22	129.849	29.5	BL1																													32378	42910
23	136.036	29.5	BL1																													32175	42819
24	142.221	29.4	BL1																													31807	42651
25	148.405	29.4	BL1																													31295	42399
26	154.593	29.4	BL1																													31627	42057
27	160.77	29.4	BL1																													31055	42596
28	166.954	29.4	BL1																													31150	42980
29	173.149	29.4	BL1																													30296	42066
30	179.341	29.4	BL1																													30920	41763
31	185.521	29.4	BL1																													30247	41898
32	191.71	29.4	BL1																													29973	41479
33	197.91	29.4	BL1																													30056	41311
34	204.101	29.4	BL1																													30412	42082
35	210.319	29.4	BL1																													29802	41583
36	216.509	29.4	BL1																													29811	41782
37	222.688	29.4	BL1																													29806	42018
38	228.861	29.4	BL1																													29655	41943
39	235.043	29.4	BL1																													29210	41449
40	241.219	29.4	BL1																													29776	41512
41	247.404	29.4	BL1																													29469	41241
42	253.582	29.4	BL1																													29223	42105
43	259.759	29.4	BL1																													29003	42357
44	265.947	29.4	BL1																													28916	41419
45	272.14	29.4	BL1																													29411	41456
46	278.324	29.4	BL1																													29837	41324
47	284.5	29.4	BL1																													29115	41347
48	290.684	29.4	BL1																													28978	41303
49	296.855	29.4	BL1																													29038	41375
50	303.031	29.4	BL1																													28971	41610
51	309.212	29.4	BL1																													29277	41070
52	315.404	29.4	BL1																													28973	40855
53	321.596	29.4	BL1																													28778	40975
54	327.789	29.4	BL1																													28957	41089
55	333.991	29.4	BL1																													28644	40770
56	340.19	29.4	BL1																													28807	41522
57	346.374	29.4	BL1																													28983	40790
58	352.556	29.4	BL1																													28790	40250
59	358.745	29.4	BL1																													28635	40818
60	364.925	29.4	BL1																													28664	40713
61	371.11	29.4	BL1																													28939	40570
62	377.308	29.4	BL1																													28605	40202
63	383.495	29.4	BL1																													28657	40324
64	389.676	29.4	BL1																													28059	39968
65	395.856	29.4	BL1																													28631	39994
66	402.053	29.3	BL1																													28610	40225
67	408.243	29.4	BL1																													28415	40137
68	414.44	29.4	BL1																													27984	40211
69	420.628	29.3	BL1																													28425	40204
70	426.826	29.3	BL1																													28128	39722
71	433.015	29.3	BL1																													28402	40114
72	439.199	29.3	BL1																													28261	39982
73	445.378	29.3	BL1																													28529	39844
74	451.562	29.3	BL1																													28505	39479
75	457.74	29.3	BL1																													28494	39682
76	463.925	29.3	BL1																													28216	39586
77	470.112	29.3	BL1																													28316	40009
78	476.288	29.3	BL1																													27900	39706
79	482.476	29.3	BL1																													28396	40329
80	488.649	29.3	BL1																													27959	39828
81	494.823	29.2	BL1																													27864	39525
82	500.998	29.2	BL1																													28097	39687
83	507.18	29.2	BL1																													28285	39964
84	513.359	29.2	BL1																													28359	40616
85	519.545	29.2	BL1																													28349	40569
86	525.725	29.2	BL1																													28645	39899
87	531.91	29.2	BL1																													28846	39797
88	538.084	29.2	BL1																													28528	39491
89	544.26	29.2	BL1																													28004	39858
90	550.445	29.2	BL1																													28569	40364
91	556.625	29.2	BL1																													28539	40161
92	562.807	29.2	BL1																													28156	39909
93	568.994	29.2	BL1																													28488	39958
94	575.18	29.2	BL1																													28304	40241
95	581.371	29.2	BL1																													28242	39481
96	587.565	29.2	BL1																													28279	39784
97	593.759	29.2	BL1																													28060	39972
98	599.948	29.2	BL1																													28068	39985
99	606.136	29.2	BL1																													28458	39363
100	612.327	29.2	BL1																													27881	39100
101	618.523	29.2	BL1																													27908	39359
102	624.71	29.2	BL1																													28154	39772
103	630.906	29.2	BL1																													28277	39253
104	637.097	29.2	BL1																													28110	39806
105	643.289	29.2	BL1																													28133	39894
106	649.468	29.2	BL1																													28154	39598
107	655.647	29.2	BL1																													28174	39201
108	661.829	29.1	BL1																													28259	39120
109	668.013	29.1	BL1																													28385	39060
110	674.202	29.2	BL1																													27718	39411
111	680.382	29.1	BL1																													28184	38878
112	686.559	29.2	BL1																													28456	39325
113	692.737	29.1	BL1																													27807	39977
114	698.913	29.1	BL1																													28186	39204
115	705.096	29.1	BL1																													28360	39043
116	711.276	29.2	BL1																													28288	39630
117	717.447	29.2	BL1																													28108	38982
118	723.621	29.2	BL1																													28079	39364
119	729.798	29.2	BL1																													28077	39141
120	735.976	29.2	BL1																													28418	38764
121	742.151	29.2	BL1																													28293	39809
122	748.331	29.2	BL1																													28529	39325
123	754.51	29.2	BL1																													28366	38787
124	760.684	29.2	BL1																													27843	39042
125	766.864	29.2	BL1																													27970	39309
126	773.039	29.2	BL1																													28117	39122
127	779.217	29.2	BL1																													27757	39170
128	785.397	29.2	BL1																													27827	38364
129	791.586	29.2	BL1																													28060	39196
130	797.774	29.2	BL1																													28021	38992
131	803.96	29.2	BL1																													27757	38927
132	810.139	29.2	BL1																													27706	38744
133	816.323	29.2	BL1																													28232	39083
134	822.504	29.2	BL1																													28068	38321
135	828.696	29.2	BL1																													27773	38629
136	834.879	29.2	BL1																													27950	39141
137	841.069	29.2	BL1																													27949	38919
138	847.257	29.2	BL1																													27542	38914
139	853.452	29.2	BL1																													27575	38501
140	859.648	29.1	BL1																													27579	38270
141	865.835	29.1	BL1																													27848	39285
142	872.023	29.1	BL1																													27858	38583
143	878.21	29.2	BL1																													27700	38861
144	884.401	29.1	BL1																													27871	38144
145	890.581	29.1	BL1																													27521	38347
146	896.766	29.1	BL1																													27612	38518
147	902.95	29.1	BL1																													27959	38218
148	909.132	29.1	BL1																													27877	38401
149	915.313	29.1	BL1																													27631	38523
150	921.497	29.1	BL1																													27330	38272
151	927.68	29.1	BL1																													27575	38652
152	933.86	29.1	BL1																													27941	38397
153	940.056	29.1	BL1																													27535	38409
154	946.249	29.1	BL1																													27838	38544
155	952.431	29.1	BL1																													27815	38407
156	958.606	29.1	BL1																													27773	38388
157	964.779	29.1	BL1																													27522	38436
158	970.965	29.1	BL1																													27441	38203
159	977.137	29.1	BL1																													27725	38191
160	983.31	29.1	BL1																													27459	37722
161	989.488	29.1	BL1																													27445	37899
162	995.671	29.1	BL1																													27626	37729
163	1001.87	29.1	BL1																													27371	37913
164	1008.06	29.1	BL1																													27650	38353
165	1014.25	29.1	BL1																													27609	38436
166	1020.43	29.1	BL1																													27527	38504
167	1026.6	29.1	BL1																													27161	38048
168	1032.78	29.1	BL1																													27514	37661
169	1038.97	29.1	BL1																													27686	37905
170	1045.15	29.1	BL1																													27561	38258
171	1051.34	29.1	BL1																													27830	38117
172	1057.54	29.1	BL1																													27828	38342
173	1063.75	29.1	BL1																													27387	37669
174	1069.94	29.1	BL1																													27113	37743
175	1076.15	29.1	BL1																													27426	38084
176	1082.34	29.1	BL1																													27333	37758
177	1088.53	29.1	BL1																													27616	38020
178	1094.71	29.1	BL1																													27342	37631
179	1100.89	29.1	BL1																													27777	38103
180	1107.06	29.1	BL1																													27824	37793
181	1113.25	29.1	BL1																													27629	37865
182	1119.43	29.1	BL1																													27646	38455
183	1125.61	29.1	BL1																													27470	37818
184	1131.79	29.1	BL1																													27709	37967
185	1137.98	29.1	BL1																													27663	38387
186	1144.17	29.1	BL1																													27654	37953
187	1150.35	29.1	BL1																													27448	38122
188	1156.53	29.1	BL1																													27768	37988
189	1162.71	29.1	BL1																													27497	38065
190	1168.89	29.1	BL1																													27665	37969
191	1175.07	29.1	BL1																													27631	38389
192	1181.25	29.1	BL1																													27492	38211
193	1187.43	29.1	BL1																													27424	38089
194	1193.62	29.1	BL1																													27748	37892
195	1199.81	29.1	BL1																													27528	37981
196	1205.99	29.1	BL1																													27746	37957
197	1212.18	29.1	BL1																													27661	38022
198	1218.35	29.2	BL1																													27805	38254
199	1224.53	29.1	BL1																													27975	38014
200	1230.7	29.1	BL1																													27775	38297
201	1236.88	29.1	BL1																													27829	38626
202	1243.06	29.1	BL1																													27686	37904
203	1249.24	29.1	BL1																													27708	38332
204	1255.43	29.1	BL1																													27391	37901
205	1261.62	29.1	BL1																													27217	37816
206	1267.81	29.1	BL1																													27706	38123
207	1274	29.1	BL1																													27411	38100
208	1280.17	29.1	BL1																													27541	37728
209	1286.36	29.1	BL1																													27546	37517
210	1292.54	29.1	BL1																													27396	37695
211	1298.72	29.1	BL1																														37864
End Time				2019-10-04 19:29:53
Warning	Execution of 'Method 1' was interrupted by the user.
Warning	Unable to meet given kinetic interval time for cycles '1, 2, 3, 4, 5, 6, 7, 8, 9, 10, 11, 12, 13, 14, 15, 16, 17, 18, 19, 20, 21, 22, 23, 24, 25, 26, 27, 28, 29, 30, 31, 32, 33, 34, 35, 36, 37, 38, 39, 40, 41, 42, 43, 44, 45, 46, 47, 48, 49, 50, 51, 52, 53, 54, 55, 56, 57, 58, 59, 60, 61, 62, 63, 64, 65, 66, 67, 68, 69, 70, 71, 72, 73, 74, 75, 76, 77, 78, 79, 80, 81, 82, 83, 84, 85, 86, 87, 88, 8…
[truncated: 49 more columns]

## Sheet: Sheet1
	13B	213	BART	296
0	213	1	296	1
6.191	212	0.995305	286	0.966216
12.367	208	0.976526	292	0.986486
18.538	206	0.967136	291	0.983108
24.724	204	0.957746	294	0.993243
30.908	201	0.943662	288	0.972973
37.091	185	0.868545	283	0.956081
43.267	188	0.882629	290	0.97973
49.453	177	0.830986	288	0.972973
55.624	174	0.816901	286	0.966216
61.808	169	0.793427	287	0.969595
67.993	159	0.746479	295	0.996622
74.193	153	0.71831	282	0.952703
80.373	148	0.694836	285	0.962838
86.562	147	0.690141	278	0.939189
92.746	144	0.676056	278	0.939189
98.933	136	0.638498	280	0.945946
105.117	130	0.610329	283	0.956081
111.319	135	0.633803	277	0.935811
117.488	127	0.596244	286	0.966216
123.67	122	0.57277	279	0.942568
129.849	116	0.544601	286	0.966216
136.036	111	0.521127	279	0.942568
142.221	115	0.539906	274	0.925676
148.405	108	0.507042	276	0.932432
154.593	94	0.441315	278	0.939189
160.77	101	0.474178	278	0.939189
166.954	91	0.42723	265	0.89527
173.149	99	0.464789	274	0.925676
179.341	85	0.399061	277	0.935811
185.521	87	0.408451	275	0.929054
191.71	84	0.394366	280	0.945946
197.91	86	0.403756	281	0.949324
204.101	76	0.356808	271	0.915541
210.319	84	0.394366	279	0.942568
216.509	76	0.356808	275	0.929054
222.688	75	0.352113	272	0.918919
228.861	74	0.347418	271	0.915541
235.043	77	0.361502	271	0.915541
241.219	62	0.29108	271	0.915541
247.404	76	0.356808	273	0.922297
253.582	67	0.314554	266	0.898649
259.759	71	0.333333	263	0.888514
265.947	76	0.356808	268	0.905405
272.14	70	0.328638	269	0.908784
278.324	55	0.258216	267	0.902027
284.5	63	0.295775	267	0.902027
290.684	72	0.338028	275	0.929054
296.855	62	0.29108	267	0.902027
303.031	64	0.300469	267	0.902027
309.212	60	0.28169	262	0.885135
315.404	65	0.305164	272	0.918919
321.596	73	0.342723	265	0.89527
327.789	65	0.305164	268	0.905405
333.991	69	0.323944	275	0.929054
340.19	64	0.300469	256	0.864865
346.374	67	0.314554	272	0.918919
352.556	68	0.319249	270	0.912162
358.745	61	0.286385	269	0.908784
364.925	59	0.276995	270	0.912162
371.11	55	0.258216	270	0.912162
377.308	68	0.319249	266	0.898649
383.495	67	0.314554	266	0.898649
389.676	66	0.309859	277	0.935811
395.856	57	0.267606	266	0.898649
402.053	65	0.305164	265	0.89527
408.243	62	0.29108	266	0.898649
414.44	67	0.314554	263	0.888514
420.628	65	0.305164	265	0.89527
426.826	69	0.323944	273	0.922297
433.015	54	0.253521	262	0.885135
439.199	62	0.29108	265	0.89527
445.378	51	0.239437	269	0.908784
451.562	61	0.286385	268	0.905405
457.74	50	0.234742	269	0.908784
463.925	60	0.28169	267	0.902027
470.112	65	0.305164	263	0.888514
476.288	60	0.28169	269	0.908784
482.476	60	0.28169	258	0.871622
488.649	64	0.300469	265	0.89527
494.823	67	0.314554	271	0.915541
500.998	68	0.319249	265	0.89527
507.18	63	0.295775	267	0.902027
513.359	65	0.305164	257	0.868243
519.545	64	0.300469	257	0.868243
525.725	61	0.286385	270	0.912162
531.91	56	0.262911	263	0.888514
538.084	57	0.267606	269	0.908784
544.26	65	0.305164	260	0.878378
550.445	58	0.2723	256	0.864865
556.625	59	0.276995	256	0.864865
562.807	66	0.309859	263	0.888514
568.994	56	0.262911	262	0.885135
575.18	68	0.319249	259	0.875
581.371	56	0.262911	260	0.878378
587.565	60	0.28169	256	0.864865
593.759	68	0.319249	256	0.864865
599.948	65	0.305164	254	0.858108
606.136	54	0.253521	262	0.885135
612.327	61	0.286385	268	0.905405
618.523	62	0.29108	264	0.891892
624.71	57	0.267606	256	0.864865
630.906	63	0.295775	264	0.891892
637.097	71	0.333333	253	0.85473
643.289	63	0.295775	253	0.85473
649.468	57	0.267606	257	0.868243
655.647	64	0.300469	257	0.868243
661.829	61	0.286385	270	0.912162
668.013	53	0.248826	265	0.89527
674.202	64	0.300469	259	0.875
680.382	53	0.248826	267	0.902027
686.559	52	0.244131	259	0.875
692.737	66	0.309859	256	0.864865
698.913	56	0.262911	258	0.871622
705.096	60	0.28169	265	0.89527
711.276	58	0.2723	256	0.864865
717.447	67	0.314554	269	0.908784
723.621	62	0.29108	260	0.878378
729.798	64	0.300469	258	0.871622
735.976	59	0.276995	265	0.89527
742.151	58	0.2723	252	0.851351
748.331	54	0.253521	259	0.875
754.51	61	0.286385	262	0.885135
760.684	64	0.300469	257	0.868243
766.864	60	0.28169	256	0.864865
773.039	62	0.29108	263	0.888514
779.217	66	0.309859	259	0.875
785.397	62	0.29108	270	0.912162
791.586	58	0.2723	257	0.868243
797.774	60	0.28169	257	0.868243
803.96	59	0.276995	259	0.875
810.139	67	0.314554	269	0.908784
816.323	57	0.267606	258	0.871622
822.504	62	0.29108	269	0.908784
828.696	67	0.314554	264	0.891892
834.879	63	0.295775	256	0.864865
841.069	59	0.276995	257	0.868243
847.257	66	0.309859	253	0.85473
853.452	61	0.286385	260	0.878378
859.648	62	0.29108	264	0.891892
865.835	68	0.319249	251	0.847973
872.023	61	0.286385	259	0.875
878.21	61	0.286385	258	0.871622
884.401	57	0.267606	266	0.898649
890.581	59	0.276995	259	0.875
896.766	65	0.305164	260	0.878378
902.95	60	0.28169	258	0.871622
909.132	55	0.258216	257	0.868243
915.313	56	0.262911	256	0.864865
921.497	60	0.28169	259	0.875
927.68	69	0.323944	255	0.861486
933.86	63	0.295775	257	0.868243
940.056	72	0.338028	257	0.868243
946.249	66	0.309859	259	0.875
952.431	57	0.267606	257	0.868243
958.606	61	0.286385	255	0.861486
964.779	61	0.286385	257	0.868243
970.965	67	0.314554	258	0.871622
977.137	58	0.2723	254	0.858108
983.31	59	0.276995	256	0.864865
989.488	58	0.2723	264	0.891892
995.671	60	0.28169	264	0.891892
1001.87	56	0.262911	260	0.878378
1008.06	59	0.276995	254	0.858108
1014.25	59	0.276995	251	0.847973
1020.43	63	0.295775	253	0.85473
1026.6	68	0.319249	254	0.858108
1032.78	62	0.29108	267	0.902027
1038.97	67	0.314554	262	0.885135
1045.15	67	0.314554	259	0.875
1051.34	61	0.286385	255	0.861486
1057.54	60	0.28169	253	0.85473
1063.75	66	0.309859	262	0.885135
1069.94	73	0.342723	255	0.861486
1076.15	66	0.309859	256	0.864865
1082.34	64	0.300469	255	0.861486
1088.53	63	0.295775	258	0.871622
1094.71	59	0.276995	256	0.864865
1100.89	61	0.286385	250	0.844595
1107.06	57	0.267606	259	0.875
1113.25	61	0.286385	264	0.891892
1119.43	59	0.276995	253	0.85473
1125.61	68	0.319249	252	0.851351
1131.79	68	0.319249	250	0.844595
1137.98	64	0.300469	252	0.851351
1144.17	62	0.29108	256	0.864865
1150.35	71	0.333333	253	0.85473
1156.53	64	0.300469	259	0.875
1162.71	56	0.262911	257	0.868243
1168.89	69	0.323944	254	0.858108
1175.07	68	0.319249	252	0.851351
1181.25	63	0.295775	259	0.875
1187.43	65	0.305164	252	0.851351
1193.62	66	0.309859	253	0.85473
1199.81	58	0.2723	259	0.875
1205.99	63	0.295775	261	0.881757
1212.18	65	0.305164	256	0.864865
1218.35	59	0.276995	255	0.861486
1224.53	57	0.267606	261	0.881757
1230.7	60	0.28169	257	0.868243
1236.88	66	0.309859	247	0.834459
1243.06	59	0.276995	256	0.864865
1249.24	61	0.286385	256	0.864865
1255.43	67	0.314554	261	0.881757
1261.62	68	0.319249	255	0.861486
1267.81	63	0.295775	254	0.858108
1274	71	0.333333	253	0.85473
1280.17	63	0.295775	260	0.878378
1286.36	61	0.286385	262	0.885135
1292.54	64	0.300469	255	0.861486
