# Supplementary material for: ARL3 activation requires the co-GEF BART and effector-mediated turnover
Source: eLife. 2021 Jan 13;10:e64624. doi: 10.7554/eLife.64624 (PMC7817177; doi:10.7554/eLife.64624)
Supplement: Figure 5—source data 2. [file elife-64624-fig5-data2.xlsx]

## Sheet: Result sheet
Method name: Method 1
Application: SparkControl				V2.3
Device: Spark				Serial number: 1805010789
Firmware:				LUM:V5.2.3|ABS:V4.3.2|ABS_MEX:V5.0.7|MTP:V13.1.5|FLUOR:V5.1.3|FLUOR_FP:V5.0.2|FLUOR_BOTTOM:V5.0.2|FLUOR_MEM:V5.0.7|FLUOR_MEX:V5.0.7
Date:				2020-02-21
Time:				3:31 PM
System				WIN-ES3VQR1Q0JI
User				WIN-ES3VQR1Q0JI\beatson
Plate				[COR96fb half area] - Corning 96 Flat Black Cat. No.: 3694
Lid lifter				No lid
Humidity Cassette				No humidity cassette
Smooth mode				Not selected
List of actions in this measurement script:
Plate
	Kinetic
		Fluorescence polarisation				Label 1
Name				COR96fb half area
Plate layout
Plate area				A1;A3-A4
Mode	Kinetic
Kinetic duration				01:00:00	hh:mm:ss
Interval time				00:00:03	hh:mm:ss
Mode	Fluorescence polarisation
Name	Label 1
Excitation				Monochromator
Excitation wavelength				366	nm
Excitation bandwidth				20	nm
Emission				Monochromator
Emission wavelength				450	nm
Emission bandwidth				20	nm
Gain				152	Optimal (100%)
Mirror				Automatic (50% Mirror)
Number of flashes				30
Integration time				40	µs
Lag time				0	µs
Settle time				0	ms
Z-Position				18217	µm
Z-Position mode				Manual
G Factor				1.814	Manual
Measurement Blank				BL1
Part of Plate				A1;A3-A4
Start Time				2020-02-21 15:22:56
Label 1 [mP]					GDP	GDP+BART
Cycle Nr.	Time [s]	Temp. [°C]	A1	A2	A3	A4	A5	A6	A7	A8	A9	A10	A11	A12	B1	B2	B3	B4	B5	B6	B7	B8	B9	B10	B11	B12	C1	C2	C3	C4	C5	C6	C7	C8	C9	C10	C11	C12	D1	D2	D3	D4	D5	D6	D7	D8	D9	D10	D11
1	0	28.9	BL1	0	184	280
2	5.938	28.9	BL1	5.938	182	285
3	11.877	28.9	BL1	11.877	160	284
4	17.809	28.9	BL1	17.809	161	282
5	23.74	28.8	BL1	23.74	147	292
6	29.674	28.8	BL1	29.674	146	279
7	35.615	28.8	BL1	35.615	140	284
8	41.549	28.7	BL1	41.549	122	290
9	47.492	28.7	BL1	47.492	122	280
10	53.428	28.7	BL1	53.428	115	277
11	59.362	28.6	BL1	59.362	104	274
12	65.297	28.6	BL1	65.297	124	287
13	71.231	28.6	BL1	71.231	103	285
14	77.183	28.6	BL1	77.183	103	282
15	83.116	28.6	BL1	83.116	86	281
16	89.054	28.6	BL1	89.054	89	276
17	94.992	28.5	BL1	94.992	75	276
18	100.928	28.5	BL1	100.928	89	278
19	106.861	28.5	BL1	106.861	70	283
20	112.789	28.5	BL1	112.789	79	283
21	118.73	28.5	BL1	118.73	64	275
22	124.656	28.4	BL1	124.656	70	276
23	130.58	28.5	BL1	130.58	69	284
24	136.509	28.5	BL1	136.509	76	275
25	142.43	28.5	BL1	142.43	62	273
26	148.364	28.5	BL1	148.364	53	282
27	154.308	28.5	BL1	154.308	64	263
28	160.243	28.5	BL1	160.243	57	279
29	166.181	28.5	BL1	166.181	56	280
30	172.117	28.5	BL1	172.117	52	271
31	178.056	28.5	BL1	178.056	66	272
32	183.999	28.5	BL1	183.999	51	271
33	189.934	28.5	BL1	189.934	59	275
34	195.87	28.5	BL1	195.87	45	278
35	201.801	28.5	BL1	201.801	49	284
36	207.735	28.5	BL1	207.735	41	275
37	213.677	28.5	BL1	213.677	47	266
38	219.618	28.5	BL1	219.618	57	275
39	225.551	28.5	BL1	225.551	41	279
40	231.481	28.5	BL1	231.481	53	277
41	237.412	28.5	BL1	237.412	55	271
42	243.344	28.4	BL1	243.344	58	278
43	249.28	28.4	BL1	249.28	38	282
44	255.224	28.4	BL1	255.224	38	272
45	261.169	28.4	BL1	261.169	44	277
46	267.097	28.4	BL1	267.097	49	274
47	273.024	28.4	BL1	273.024	49	271
48	278.957	28.4	BL1	278.957	27	264
49	284.884	28.4	BL1	284.884	54	274
50	290.824	28.4	BL1	290.824	64	275
51	296.768	28.4	BL1	296.768	41	275
52	302.701	28.4	BL1	302.701	59	269
53	308.639	28.4	BL1	308.639	54	268
54	314.572	28.4	BL1	314.572	31	274
55	320.507	28.4	BL1	320.507	35	271
56	326.445	28.3	BL1	326.445	38	269
57	332.387	28.3	BL1	332.387	40	266
58	338.324	28.3	BL1	338.324	17	279
59	344.252	28.3	BL1	344.252	35	265
60	350.188	28.3	BL1	350.188	37	270
61	356.127	28.3	BL1	356.127	44	276
62	362.071	28.2	BL1	362.071	50	270
63	368.004	28.2	BL1	368.004	38	274
64	373.937	28.2	BL1	373.937	50	278
65	379.866	28.2	BL1	379.866	55	274
66	385.8	28.2	BL1	385.8	30	260
67	391.732	28.2	BL1	391.732	42	266
68	397.659	28.2	BL1	397.659	36	267
69	403.586	28.2	BL1	403.586	41	262
70	409.514	28.2	BL1	409.514	30	278
71	415.443	28.2	BL1	415.443	35	272
72	421.387	28.1	BL1	421.387	32	278
73	427.325	28.1	BL1	427.325	51	271
74	433.257	28.1	BL1	433.257	62	277
75	439.186	28.1	BL1	439.186	55	270
76	445.112	28.1	BL1	445.112	51	267
77	451.037	28.1	BL1	451.037	43	274
78	456.979	28.1	BL1	456.979	45	269
79	462.906	28.1	BL1	462.906	24	268
80	468.834	28.1	BL1	468.834	40	272
81	474.757	28.1	BL1	474.757	51	276
82	480.688	28.1	BL1	480.688	44	266
83	486.614	28.1	BL1	486.614	53	269
84	492.545	28.1	BL1	492.545	41	275
85	498.48	28.1	BL1	498.48	45	269
86	504.416	28.1	BL1	504.416	27	273
Rawdata (perpendicular)
Cycle Nr.	Time [s]	Temp. [°C]	A1	A2	A3	A4	A5	A6	A7	A8	A9	A10	A11	A12	B1	B2	B3	B4	B5	B6	B7	B8	B9	B10	B11	B12	C1	C2	C3	C4	C5	C6	C7	C8	C9	C10	C11	C12	D1	D2	D3	D4	D5	D6	D7	D8	D9	D10	D11
1	0	28.9	2850		39537	45989
2	5.938	28.9	2856		38265	45715
3	11.877	28.9	2842		38518	45874
4	17.809	28.9	2947		37508	46124
5	23.74	28.8	2902		36942	44951
6	29.674	28.8	2863		36562	45794
7	35.615	28.8	2781		35177	45415
8	41.549	28.7	2838		35201	45309
9	47.492	28.7	2866		35001	44983
10	53.428	28.7	2847		34231	45604
11	59.362	28.6	2833		34416	45157
12	65.297	28.6	2870		33564	44396
13	71.231	28.6	2817		33268	44737
14	77.183	28.6	2789		33323	44633
15	83.116	28.6	2811		33231	44440
16	89.054	28.6	2914		33213	44372
17	94.992	28.5	2739		32646	44645
18	100.928	28.5	2685		31852	44384
19	106.861	28.5	2842		32320	44197
20	112.789	28.5	2927		32197	43761
21	118.73	28.5	2882		32456	44455
22	124.656	28.4	2986		31814	44521
23	130.58	28.5	2813		31758	43939
24	136.509	28.5	2830		30938	44268
25	142.43	28.5	2778		31599	43994
26	148.364	28.5	2790		31543	43652
27	154.308	28.5	2817		31075	45045
28	160.243	28.5	2758		30934	43741
29	166.181	28.5	2720		30836	43672
30	172.117	28.5	2723		30329	43486
31	178.056	28.5	2851		30594	43980
32	183.999	28.5	2896		30720	43562
33	189.934	28.5	2836		30713	43164
34	195.87	28.5	2907		30666	43289
35	201.801	28.5	2895		30552	42893
36	207.735	28.5	2834		30296	43661
37	213.677	28.5	2789		30222	43015
38	219.618	28.5	2844		29980	42789
39	225.551	28.5	2709		30751	42974
40	231.481	28.5	2762		29717	42982
41	237.412	28.5	2813		29740	43081
42	243.344	28.4	2826		29624	42659
43	249.28	28.4	2832		30114	42926
44	255.224	28.4	2929		30163	43026
45	261.169	28.4	2795		30064	42637
46	267.097	28.4	2740		30055	42981
47	273.024	28.4	2827		29797	42722
48	278.957	28.4	2816		29846	42948
49	284.884	28.4	2807		29769	42853
50	290.824	28.4	2775		29436	42848
51	296.768	28.4	2834		29616	42654
52	302.701	28.4	2746		29373	42711
53	308.639	28.4	2855		29425	42813
54	314.572	28.4	2792		29630	42700
55	320.507	28.4	2760		29846	42687
56	326.445	28.3	2670		29747	42413
57	332.387	28.3	2766		29607	42660
58	338.324	28.3	2705		30030	42395
59	344.252	28.3	2665		29645	42873
60	350.188	28.3	2713		29832	42974
61	356.127	28.3	2757		29194	42843
62	362.071	28.2	2727		29852	42867
63	368.004	28.2	2914		29359	42826
64	373.937	28.2	2823		29645	42355
65	379.866	28.2	2702		28991	42222
66	385.8	28.2	2796		29488	42735
67	391.732	28.2	2776		29625	42580
68	397.659	28.2	2793		29723	42725
69	403.586	28.2	2822		29307	42799
70	409.514	28.2	2762		29772	42073
71	415.443	28.2	2809		29471	42425
72	421.387	28.1	2639		29885	42253
73	427.325	28.1	2651		29407	42164
74	433.257	28.1	2868		29154	42086
75	439.186	28.1	2633		28839	41954
76	445.112	28.1	2738		28877	42366
77	451.037	28.1	2831		29114	42092
78	456.979	28.1	2815		28870	42414
79	462.906	28.1	2772		29769	41967
80	468.834	28.1	2774		29444	41881
81	474.757	28.1	2814		29107	42566
82	480.688	28.1	2802		29714	42645
83	486.614	28.1	2689		28903	41956
84	492.545	28.1	2936		29673	42231
85	498.48	28.1	2767		29110	42211
86	504.416	28.1	2760		29364	41710
Rawdata (parallel)
Cycle Nr.	Time [s]	Temp. [°C]	A1	A2	A3	A4	A5	A6	A7	A8	A9	A10	A11	A12	B1	B2	B3	B4	B5	B6	B7	B8	B9	B10	B11	B12	C1	C2	C3	C4	C5	C6	C7	C8	C9	C10	C11	C12	D1	D2	D3	D4	D5	D6	D7	D8	D9	D10	D11
1	0	28.9	3146		32494	45385
2	5.938	28.9	3126		31352	45605
3	11.877	28.9	3064		30240	45602
4	17.809	28.9	3140		29500	45638
5	23.74	28.8	3164		28400	45499
6	29.674	28.8	3131		28081	45133
7	35.615	28.8	3105		26755	45208
8	41.549	28.7	3281		26093	45782
9	47.492	28.7	3143		25767	44430
10	53.428	28.7	3236		25034	44835
11	59.362	28.6	3206		24678	44174
12	65.297	28.6	3058		24771	44351
13	71.231	28.6	2947		23584	44444
14	77.183	28.6	3141		23828	44300
15	83.116	28.6	3217		23132	44122
16	89.054	28.6	3217		23178	43539
17	94.992	28.5	3160		22306	43836
18	100.928	28.5	3172		22376	43822
19	106.861	28.5	3078		21771	43916
20	112.789	28.5	3167		22070	43461
21	118.73	28.5	3085		21601	43372
22	124.656	28.4	2961		21250	43316
23	130.58	28.5	2951		21270	43590
24	136.509	28.5	3056		21098	43200
25	142.43	28.5	3036		21037	42826
26	148.364	28.5	3094		20711	43341
27	154.308	28.5	2994		20691	42917
28	160.243	28.5	3088		20494	43189
29	166.181	28.5	3128		20454	43288
30	172.117	28.5	3084		19957	42226
31	178.056	28.5	3111		20552	42687
32	183.999	28.5	3153		20154	42253
33	189.934	28.5	2956		20251	42023
34	195.87	28.5	3252		19994	42613
35	201.801	28.5	3086		19918	42594
36	207.735	28.5	3124		19562	42746
37	213.677	28.5	3063		19684	41275
38	219.618	28.5	3262		20015	41966
39	225.551	28.5	3088		19862	42494
40	231.481	28.5	3131		19659	42280
41	237.412	28.5	3013		19581	41679
42	243.344	28.4	3103		19689	41944
43	249.28	28.4	3139		19381	42599
44	255.224	28.4	3163		19347	41754
45	261.169	28.4	3107		19513	41912
46	267.097	28.4	3026		19632	41931
47	273.024	28.4	3056		19460	41375
48	278.957	28.4	3135		18869	41124
49	284.884	28.4	3128		19688	41863
50	290.824	28.4	3127		19843	41970
51	296.768	28.4	3078		19111	41687
52	302.701	28.4	3095		19631	41377
53	308.639	28.4	3033		19362	41177
54	314.572	28.4	3035		18773	41633
55	320.507	28.4	3092		19105	41482
56	326.445	28.3	3125		19232	41176
57	332.387	28.3	3041		19070	40965
58	338.324	28.3	3103		18678	41890
59	344.252	28.3	3114		19052	41237
60	350.188	28.3	3018		19128	41639
61	356.127	28.3	3103		19021	42073
62	362.071	28.2	3030		19558	41527
63	368.004	28.2	3117		18848	41759
64	373.937	28.2	3010		19344	41610
65	379.866	28.2	2959		19126	41213
66	385.8	28.2	3313		18926	40831
67	391.732	28.2	3119		19229	40999
68	397.659	28.2	3103		19046	41130
69	403.586	28.2	3069		18934	40790
70	409.514	28.2	3153		18974	41509
71	415.443	28.2	3150		18928	41332
72	421.387	28.1	3154		19159	41845
73	427.325	28.1	3079		19407	41028
74	433.257	28.1	3026		19438	41224
75	439.186	28.1	2950		19076	40639
76	445.112	28.1	3030		18983	40809
77	451.037	28.1	3163		18960	41172
78	456.979	28.1	3004		18722	40902
79	462.906	28.1	3112		18737	40550
80	468.834	28.1	3117		19052	40813
81	474.757	28.1	3066		19124	41679
82	480.688	28.1	3017		19220	40940
83	486.614	28.1	3068		19151	40625
84	492.545	28.1	3025		19021	41132
85	498.48	28.1	3101		19003	40855
86	504.416	28.1	3121		18595	40733
Anisotropy
Cycle Nr.	Time [s]	Temp. [°C]	A1	A2	A3	A4	A5	A6	A7	A8	A9	A10	A11	A12	B1	B2	B3	B4	B5	B6	B7	B8	B9	B10	B11	B12	C1	C2	C3	C4	C5	C6	C7	C8	C9	C10	C11	C12	D1	D2	D3	D4	D5	D6	D7	D8	D9	D10	D11
1	0	28.9	BL1		131	206
2	5.938	28.9	BL1		129	210
3	11.877	28.9	BL1		113	209
4	17.809	28.9	BL1		113	208
5	23.74	28.8	BL1		103	216
6	29.674	28.8	BL1		103	205
7	35.615	28.8	BL1		98	209
8	41.549	28.7	BL1		85	214
9	47.492	28.7	BL1		85	206
10	53.428	28.7	BL1		80	203
11	59.362	28.6	BL1		72	201
12	65.297	28.6	BL1		86	211
13	71.231	28.6	BL1		71	210
14	77.183	28.6	BL1		71	207
15	83.116	28.6	BL1		59	207
16	89.054	28.6	BL1		61	203
17	94.992	28.5	BL1		51	202
18	100.928	28.5	BL1		61	204
19	106.861	28.5	BL1		48	209
20	112.789	28.5	BL1		54	208
21	118.73	28.5	BL1		43	202
22	124.656	28.4	BL1		48	203
23	130.58	28.5	BL1		47	209
24	136.509	28.5	BL1		52	202
25	142.43	28.5	BL1		42	200
26	148.364	28.5	BL1		36	208
27	154.308	28.5	BL1		43	192
28	160.243	28.5	BL1		39	205
29	166.181	28.5	BL1		38	206
30	172.117	28.5	BL1		35	198
31	178.056	28.5	BL1		45	199
32	183.999	28.5	BL1		35	199
33	189.934	28.5	BL1		40	202
34	195.87	28.5	BL1		30	204
35	201.801	28.5	BL1		34	209
36	207.735	28.5	BL1		28	202
37	213.677	28.5	BL1		32	194
38	219.618	28.5	BL1		38	202
39	225.551	28.5	BL1		28	205
40	231.481	28.5	BL1		36	203
41	237.412	28.5	BL1		37	198
42	243.344	28.4	BL1		39	204
43	249.28	28.4	BL1		26	207
44	255.224	28.4	BL1		25	199
45	261.169	28.4	BL1		30	204
46	267.097	28.4	BL1		33	201
47	273.024	28.4	BL1		33	198
48	278.957	28.4	BL1		18	193
49	284.884	28.4	BL1		37	201
50	290.824	28.4	BL1		44	202
51	296.768	28.4	BL1		28	202
52	302.701	28.4	BL1		40	197
53	308.639	28.4	BL1		37	196
54	314.572	28.4	BL1		21	201
55	320.507	28.4	BL1		24	199
56	326.445	28.3	BL1		26	197
57	332.387	28.3	BL1		27	195
58	338.324	28.3	BL1		11	205
59	344.252	28.3	BL1		23	194
60	350.188	28.3	BL1		25	198
61	356.127	28.3	BL1		30	203
62	362.071	28.2	BL1		34	198
63	368.004	28.2	BL1		26	201
64	373.937	28.2	BL1		34	204
65	379.866	28.2	BL1		37	201
66	385.8	28.2	BL1		20	190
67	391.732	28.2	BL1		29	195
68	397.659	28.2	BL1		24	195
69	403.586	28.2	BL1		28	192
70	409.514	28.2	BL1		20	204
71	415.443	28.2	BL1		24	200
72	421.387	28.1	BL1		21	205
73	427.325	28.1	BL1		34	198
74	433.257	28.1	BL1		42	204
75	439.186	28.1	BL1		37	198
76	445.112	28.1	BL1		34	196
77	451.037	28.1	BL1		29	201
78	456.979	28.1	BL1		30	197
79	462.906	28.1	BL1		16	196
80	468.834	28.1	BL1		27	200
81	474.757	28.1	BL1		35	203
82	480.688	28.1	BL1		30	195
83	486.614	28.1	BL1		36	197
84	492.545	28.1	BL1		28	202
85	498.48	28.1	BL1		31	197
86	504.416	28.1	BL1		18	200
Total Intensity
Cycle Nr.	Time [s]	Temp. [°C]	A1	A2	A3	A4	A5	A6	A7	A8	A9	A10	A11	A12	B1	B2	B3	B4	B5	B6	B7	B8	B9	B10	B11	B12	C1	C2	C3	C4	C5	C6	C7	C8	C9	C10	C11	C12	D1	D2	D3	D4	D5	D6	D7	D8	D9	D10	D11
1	0	28.9	BL1		126611	162901
2	5.938	28.9	BL1		122021	162774
3	11.877	28.9	BL1		120650	163228
4	17.809	28.9	BL1		116940	163445
5	23.74	28.8	BL1		113858	160893
6	29.674	28.8	BL1		112658	162054
7	35.615	28.8	BL1		107692	161642
8	41.549	28.7	BL1		106109	162041
9	47.492	28.7	BL1		105311	159129
10	53.428	28.7	BL1		102309	160975
11	59.362	28.6	BL1		102116	158965
12	65.297	28.6	BL1		100776	157959
13	71.231	28.6	BL1		98336	159114
14	77.183	28.6	BL1		98596	158350
15	83.116	28.6	BL1		96966	157460
16	89.054	28.6	BL1		96806	156060
17	94.992	28.5	BL1		94545	157597
18	100.928	28.5	BL1		93171	157137
19	106.861	28.5	BL1		92865	156792
20	112.789	28.5	BL1		92830	154762
21	118.73	28.5	BL1		92736	156225
22	124.656	28.4	BL1		90832	156274
23	130.58	28.5	BL1		91120	155971
24	136.509	28.5	BL1		88944	155698
25	142.43	28.5	BL1		90296	154611
26	148.364	28.5	BL1		89464	154732
27	154.308	28.5	BL1		88618	156877
28	160.243	28.5	BL1		87927	154710
29	166.181	28.5	BL1		87662	154755
30	172.117	28.5	BL1		85817	152528
31	178.056	28.5	BL1		87124	154049
32	183.999	28.5	BL1		86489	152259
33	189.934	28.5	BL1		87127	151524
34	195.87	28.5	BL1		85888	152166
35	201.801	28.5	BL1		85847	151662
36	207.735	28.5	BL1		84742	153528
37	213.677	28.5	BL1		85018	149769
38	219.618	28.5	BL1		84661	150098
39	225.551	28.5	BL1		86515	152014
40	231.481	28.5	BL1		83893	151457
41	237.412	28.5	BL1		83907	150676
42	243.344	28.4	BL1		83684	150125
43	249.28	28.4	BL1		84027	151767
44	255.224	28.4	BL1		83825	150198
45	261.169	28.4	BL1		84300	150076
46	267.097	28.4	BL1		84753	151056
47	273.024	28.4	BL1		83696	149302
48	278.957	28.4	BL1		82602	149177
49	284.884	28.4	BL1		83965	150359
50	290.824	28.4	BL1		83644	150608
51	296.768	28.4	BL1		82645	149675
52	302.701	28.4	BL1		83249	149374
53	308.639	28.4	BL1		82760	149109
54	314.572	28.4	BL1		82224	149831
55	320.507	28.4	BL1		83218	149493
56	326.445	28.3	BL1		83373	148510
57	332.387	28.3	BL1		82759	148582
58	338.324	28.3	BL1		82903	149739
59	344.252	28.3	BL1		82872	149571
60	350.188	28.3	BL1		83462	150580
61	356.127	28.3	BL1		81749	150866
62	362.071	28.2	BL1		84231	150112
63	368.004	28.2	BL1		81424	149921
64	373.937	28.2	BL1		83274	149084
65	379.866	28.2	BL1		81905	148432
66	385.8	28.2	BL1		81707	147938
67	391.732	28.2	BL1		82920	148323
68	397.659	28.2	BL1		82780	148844
69	403.586	28.2	BL1		81749	148380
70	409.514	28.2	BL1		82718	148199
71	415.443	28.2	BL1		81944	148494
72	421.387	28.1	BL1		83525	149414
73	427.325	28.1	BL1		83130	147865
74	433.257	28.1	BL1		82343	147729
75	439.186	28.1	BL1		81665	147010
76	445.112	28.1	BL1		81217	147788
77	451.037	28.1	BL1		81221	147471
78	456.979	28.1	BL1		80621	147944
79	462.906	28.1	BL1		82338	146303
80	468.834	28.1	BL1		82244	146594
81	474.757	28.1	BL1		81715	149547
82	480.688	28.1	BL1		83216	148479
83	486.614	28.1	BL1		81602	146662
84	492.545	28.1	BL1		82493	147718
85	498.48	28.1	BL1		81533	147375
86	504.416	28.1	BL1		81277	146127
Intensity (parallel)
Cycle Nr.	Time [s]	Temp. [°C]	A1	A2	A3	A4	A5	A6	A7	A8	A9	A10	A11	A12	B1	B2	B3	B4	B5	B6	B7	B8	B9	B10	B11	B12	C1	C2	C3	C4	C5	C6	C7	C8	C9	C10	C11	C12	D1	D2	D3	D4	D5	D6	D7	D8	D9	D10	D11
1	0	28.9	BL1		53237	76621
2	5.938	28.9	BL1		51202	77057
3	11.877	28.9	BL1		49298	77165
4	17.809	28.9	BL1		47818	77092
5	23.74	28.8	BL1		45778	76795
6	29.674	28.8	BL1		45259	76192
7	35.615	28.8	BL1		42900	76374
8	41.549	28.7	BL1		41382	77098
9	47.492	28.7	BL1		41041	74896
10	53.428	28.7	BL1		39541	75460
11	59.362	28.6	BL1		38950	74316
12	65.297	28.6	BL1		39388	74907
13	71.231	28.6	BL1		37435	75276
14	77.183	28.6	BL1		37527	74662
15	83.116	28.6	BL1		36124	74202
16	89.054	28.6	BL1		36208	73145
17	94.992	28.5	BL1		34731	73786
18	100.928	28.5	BL1		34837	73739
19	106.861	28.5	BL1		33908	74080
20	112.789	28.5	BL1		34290	73093
21	118.73	28.5	BL1		33587	73079
22	124.656	28.4	BL1		33175	73203
23	130.58	28.5	BL1		33232	73719
24	136.509	28.5	BL1		32728	72822
25	142.43	28.5	BL1		32653	72179
26	148.364	28.5	BL1		31957	73008
27	154.308	28.5	BL1		32102	72421
28	160.243	28.5	BL1		31575	72744
29	166.181	28.5	BL1		31430	72850
30	172.117	28.5	BL1		30607	71004
31	178.056	28.5	BL1		31637	71791
32	183.999	28.5	BL1		30841	70927
33	189.934	28.5	BL1		31373	70868
34	195.87	28.5	BL1		30370	71402
35	201.801	28.5	BL1		30534	71668
36	207.735	28.5	BL1		29818	71874
37	213.677	28.5	BL1		30151	69317
38	219.618	28.5	BL1		30389	70208
39	225.551	28.5	BL1		30429	71483
40	231.481	28.5	BL1		29982	71016
41	237.412	28.5	BL1		30054	70139
42	243.344	28.4	BL1		30087	70457
43	249.28	28.4	BL1		29462	71579
44	255.224	28.4	BL1		29357	70004
45	261.169	28.4	BL1		29761	70392
46	267.097	28.4	BL1		30124	70575
47	273.024	28.4	BL1		29757	69511
48	278.957	28.4	BL1		28542	68914
49	284.884	28.4	BL1		30041	70266
50	290.824	28.4	BL1		30322	70461
51	296.768	28.4	BL1		29083	70037
52	302.701	28.4	BL1		29995	69442
53	308.639	28.4	BL1		29621	69193
54	314.572	28.4	BL1		28549	70017
55	320.507	28.4	BL1		29047	69640
56	326.445	28.3	BL1		29219	69025
57	332.387	28.3	BL1		29076	68794
58	338.324	28.3	BL1		28253	70359
59	344.252	28.3	BL1		28911	69155
60	350.188	28.3	BL1		29224	70058
61	356.127	28.3	BL1		28875	70692
62	362.071	28.2	BL1		29982	69833
63	368.004	28.2	BL1		28534	70097
64	373.937	28.2	BL1		29630	70019
65	379.866	28.2	BL1		29328	69393
66	385.8	28.2	BL1		28323	68059
67	391.732	28.2	BL1		29222	68714
68	397.659	28.2	BL1		28921	68982
69	403.586	28.2	BL1		28778	68426
70	409.514	28.2	BL1		28698	69577
71	415.443	28.2	BL1		28621	69261
72	421.387	28.1	BL1		29032	70185
73	427.325	28.1	BL1		29619	68839
74	433.257	28.1	BL1		29771	69291
75	439.186	28.1	BL1		29252	68368
76	445.112	28.1	BL1		28939	68532
77	451.037	28.1	BL1		28655	68948
78	456.979	28.1	BL1		28511	68745
79	462.906	28.1	BL1		28344	67913
80	468.834	28.1	BL1		28905	68381
81	474.757	28.1	BL1		29130	70045
82	480.688	28.1	BL1		29393	68793
83	486.614	28.1	BL1		29174	68128
84	492.545	28.1	BL1		29018	69126
85	498.48	28.1	BL1		28848	68486
86	504.416	28.1	BL1		28070	68228
Intensity (perpendicular)
Cycle Nr.	Time [s]	Temp. [°C]	A1	A2	A3	A4	A5	A6	A7	A8	A9	A10	A11	A12	B1	B2	B3	B4	B5	B6	B7	B8	B9	B10	B11	B12	C1	C2	C3	C4	C5	C6	C7	C8	C9	C10	C11	C12	D1	D2	D3	D4	D5	D6	D7	D8	D9	D10	D11
1	0	28.9	BL1		36687	43140
2	5.938	28.9	BL1		35409	42859
3	11.877	28.9	BL1		35676	43032
4	17.809	28.9	BL1		34561	43176
5	23.74	28.8	BL1		34040	42049
6	29.674	28.8	BL1		33699	42931
7	35.615	28.8	BL1		32396	42634
8	41.549	28.7	BL1		32363	42471
9	47.492	28.7	BL1		32135	42116
10	53.428	28.7	BL1		31384	42757
11	59.362	28.6	BL1		31583	42324
12	65.297	28.6	BL1		30694	41526
13	71.231	28.6	BL1		30450	41919
14	77.183	28.6	BL1		30534	41844
15	83.116	28.6	BL1		30421	41629
16	89.054	28.6	BL1		30299	41458
17	94.992	28.5	BL1		29907	41905
18	100.928	28.5	BL1		29167	41699
19	106.861	28.5	BL1		29479	41356
20	112.789	28.5	BL1		29270	40834
21	118.73	28.5	BL1		29574	41573
22	124.656	28.4	BL1		28829	41535
23	130.58	28.5	BL1		28944	41126
24	136.509	28.5	BL1		28108	41438
25	142.43	28.5	BL1		28821	41216
26	148.364	28.5	BL1		28753	40862
27	154.308	28.5	BL1		28258	42228
28	160.243	28.5	BL1		28176	40983
29	166.181	28.5	BL1		28116	40953
30	172.117	28.5	BL1		27605	40762
31	178.056	28.5	BL1		27743	41129
32	183.999	28.5	BL1		27824	40666
33	189.934	28.5	BL1		27877	40328
34	195.87	28.5	BL1		27759	40382
35	201.801	28.5	BL1		27657	39997
36	207.735	28.5	BL1		27462	40827
37	213.677	28.5	BL1		27433	40226
38	219.618	28.5	BL1		27136	39945
39	225.551	28.5	BL1		28043	40265
40	231.481	28.5	BL1		26955	40221
41	237.412	28.5	BL1		26927	40268
42	243.344	28.4	BL1		26799	39834
43	249.28	28.4	BL1		27282	40094
44	255.224	28.4	BL1		27234	40097
45	261.169	28.4	BL1		27269	39842
46	267.097	28.4	BL1		27315	40241
47	273.024	28.4	BL1		26969	39895
48	278.957	28.4	BL1		27030	40132
49	284.884	28.4	BL1		26962	40046
50	290.824	28.4	BL1		26661	40073
51	296.768	28.4	BL1		26781	39819
52	302.701	28.4	BL1		26627	39966
53	308.639	28.4	BL1		26569	39958
54	314.572	28.4	BL1		26837	39907
55	320.507	28.4	BL1		27086	39927
56	326.445	28.3	BL1		27077	39743
57	332.387	28.3	BL1		26841	39894
58	338.324	28.3	BL1		27325	39690
59	344.252	28.3	BL1		26980	40208
60	350.188	28.3	BL1		27119	40261
61	356.127	28.3	BL1		26437	40087
62	362.071	28.2	BL1		27125	40139
63	368.004	28.2	BL1		26445	39912
64	373.937	28.2	BL1		26822	39532
65	379.866	28.2	BL1		26289	39519
66	385.8	28.2	BL1		26692	39939
67	391.732	28.2	BL1		26849	39804
68	397.659	28.2	BL1		26930	39931
69	403.586	28.2	BL1		26485	39977
70	409.514	28.2	BL1		27010	39311
71	415.443	28.2	BL1		26662	39616
72	421.387	28.1	BL1		27246	39614
73	427.325	28.1	BL1		26755	39513
74	433.257	28.1	BL1		26286	39219
75	439.186	28.1	BL1		26206	39321
76	445.112	28.1	BL1		26139	39628
77	451.037	28.1	BL1		26283	39261
78	456.979	28.1	BL1		26055	39599
79	462.906	28.1	BL1		26997	39195
80	468.834	28.1	BL1		26669	39107
81	474.757	28.1	BL1		26292	39751
82	480.688	28.1	BL1		26912	39843
83	486.614	28.1	BL1		26214	39267
84	492.545	28.1	BL1		26737	39296
85	498.48	28.1	BL1		26343	39444
86	504.416	28.1	BL1		26604	38950
End Time				2020-02-21 15:31:33
Warning	Execution of 'Method 1' was interrupted by the user.
Warning	Unable to meet given kinetic interval time for cycles '1, 2, 3, 4, 5, 6, 7, 8, 9, 10, 11, 12, 13, 14, 15, 16, 17, 18, 19, 20, 21, 22, 23, 24, 25, 26, 27, 28, 29, 30, 31, 32, 33, 34, 35, 36, 37, 38, 39, 40, 41, 42, 43, 44, 45, 46, 47, 48, 49, 50, 51, 52, 53, 54, 55, 56, 57, 58, 59, 60, 61, 62, 63, 64, 65, 66, 67, 68, 69, 70, 71, 72, 73, 74, 75, 76, 77, 78, 79, 80, 81, 82, 83, 84, 85, 86'.
[truncated: 49 more columns]

## Sheet: Sheet1
	GDP	184	GDP+BART	292
0	184	1	280	0.958904
5.938	182	0.98913	285	0.976027
11.877	160	0.869565	284	0.972603
17.809	161	0.875	282	0.965753
23.74	147	0.798913	292	1
29.674	146	0.793478	279	0.955479
35.615	140	0.76087	284	0.972603
41.549	122	0.663043	290	0.993151
47.492	122	0.663043	280	0.958904
53.428	115	0.625	277	0.94863
59.362	104	0.565217	274	0.938356
65.297	124	0.673913	287	0.982877
71.231	103	0.559783	285	0.976027
77.183	103	0.559783	282	0.965753
83.116	86	0.467391	281	0.962329
89.054	89	0.483696	276	0.945205
94.992	75	0.407609	276	0.945205
100.928	89	0.483696	278	0.952055
106.861	70	0.380435	283	0.969178
112.789	79	0.429348	283	0.969178
118.73	64	0.347826	275	0.941781
124.656	70	0.380435	276	0.945205
130.58	69	0.375	284	0.972603
136.509	76	0.413043	275	0.941781
142.43	62	0.336957	273	0.934932
148.364	53	0.288043	282	0.965753
154.308	64	0.347826	263	0.900685
160.243	57	0.309783	279	0.955479
166.181	56	0.304348	280	0.958904
172.117	52	0.282609	271	0.928082
178.056	66	0.358696	272	0.931507
183.999	51	0.277174	271	0.928082
189.934	59	0.320652	275	0.941781
195.87	45	0.244565	278	0.952055
201.801	49	0.266304	284	0.972603
207.735	41	0.222826	275	0.941781
213.677	47	0.255435	266	0.910959
219.618	57	0.309783	275	0.941781
225.551	41	0.222826	279	0.955479
231.481	53	0.288043	277	0.94863
237.412	55	0.298913	271	0.928082
243.344	58	0.315217	278	0.952055
249.28	38	0.206522	282	0.965753
255.224	38	0.206522	272	0.931507
261.169	44	0.23913	277	0.94863
267.097	49	0.266304	274	0.938356
273.024	49	0.266304	271	0.928082
278.957	27	0.146739	264	0.90411
284.884	54	0.293478	274	0.938356
290.824	64	0.347826	275	0.941781
296.768	41	0.222826	275	0.941781
302.701	59	0.320652	269	0.921233
308.639	54	0.293478	268	0.917808
314.572	31	0.168478	274	0.938356
320.507	35	0.190217	271	0.928082
326.445	38	0.206522	269	0.921233
332.387	40	0.217391	266	0.910959
338.324	17	0.0923913	279	0.955479
344.252	35	0.190217	265	0.907534
350.188	37	0.201087	270	0.924658
356.127	44	0.23913	276	0.945205
362.071	50	0.271739	270	0.924658
368.004	38	0.206522	274	0.938356
373.937	50	0.271739	278	0.952055
379.866	55	0.298913	274	0.938356
385.8	30	0.163043	260	0.890411
391.732	42	0.228261	266	0.910959
397.659	36	0.195652	267	0.914384
403.586	41	0.222826	262	0.89726
409.514	30	0.163043	278	0.952055
415.443	35	0.190217	272	0.931507
421.387	32	0.173913	278	0.952055
427.325	51	0.277174	271	0.928082
433.257	62	0.336957	277	0.94863
439.186	55	0.298913	270	0.924658
445.112	51	0.277174	267	0.914384
451.037	43	0.233696	274	0.938356
456.979	45	0.244565	269	0.921233
462.906	24	0.130435	268	0.917808
468.834	40	0.217391	272	0.931507
474.757	51	0.277174	276	0.945205
480.688	44	0.23913	266	0.910959
486.614	53	0.288043	269	0.921233
492.545	41	0.222826	275	0.941781
498.48	45	0.244565	269	0.921233
504.416	27	0.146739	273	0.934932
